# Supplementary material
Source: publisher figshare collection journal article supplement (https://acs.figshare.com/ndownloader/files/25756986)
Supplement: Supplementary file 1 [file 25756986]

## Sheet: Proteins
Table S5_Multireport of proteins identified in the midgut section
Checked	Protein FDR Confidence: Combined	Master	Accession	Description	tBlastn results	Exp. q-value: Combined	Contaminant	Sum PEP Score	Coverage [%]	# Peptides	# PSMs	# Unique Peptides	# AAs	MW [kDa]	calc. pI	Score Sequest HT: A Sequest HT	Score Sequest HT: B Sequest HT	Score Sequest HT: C Sequest HT	Score Sequest HT: D Sequest HT	Score Sequest HT: E Sequest HT	Score Sequest HT: F Sequest HT	Score Sequest HT: G Sequest HT	Score Sequest HT: H Sequest HT	Score Sequest HT: I Sequest HT	Score Sequest HT: J Sequest HT	Score Sequest HT: K Sequest HT	Score Sequest HT: L Sequest HT	Score Sequest HT: M Sequest HT	Score Sequest HT: N Sequest HT	Score Sequest HT: O Sequest HT	Score Sequest HT: P Sequest HT	Score Sequest HT: Q Sequest HT	Score Sequest HT: R Sequest HT	Score Sequest HT: S Sequest HT	Score Sequest HT: T Sequest HT	# Peptides (by Search Engine): A Sequest HT	# Peptides (by Search Engine): B Sequest HT	# Peptides (by Search Engine): C Sequest HT	# Peptides (by Search Engine): D Sequest HT	# Peptides (by Search Engine): E Sequest HT	# Peptides (by Search Engine): F Sequest HT	# Peptides (by Search Engine): G Sequest HT	# Peptides (by Search Engine): H Sequest HT	# Peptides (by Search Engine): I Sequest HT	# Peptides (by Search Engine): J Sequest HT	# Peptides (by Search Engine): K Sequest HT	# Peptides (by Search Engine): L Sequest HT	# Peptides (by Search Engine): M Sequest HT	# Peptides (by Search Engine): N Sequest HT
FALSE	High	Master Protein	A0A088AS00	1,2-dihydroxy-3-keto-5-methylthiopentene dioxygenase OS=Apis mellifera OX=7460 GN=LOC551839 PE=3 SV=1		0	FALSE	5.158	10	1	1	1	185	22.4	6.23									2.86																				1
FALSE	High	Master Protein	A0A0F6KUH0	10 kDa chaperonin OS=Serratia marcescens OX=615 GN=groES PE=3 SV=1		0	FALSE	4.743	14	1	1	1	97	10.3	5.5			3.04																				1
FALSE	High	Master Protein	A0A087ZYB7	10-formyltetrahydrofolate dehydrogenase OS=Apis mellifera OX=7460 PE=3 SV=1		0	FALSE	7.892	3	2	2	1	919	102.2	6.44			3.51	1.67																			1	1
FALSE	High	Master Protein	A0A087ZUP0	14_3_3 domain-containing protein OS=Apis mellifera OX=7460 GN=14-3-3epsilon PE=3 SV=1		0	FALSE	21.964	18	5	52	3	256	29.1	4.89	1.91		6.46	9.19		3.58		0	11.64	4.26	8.9		2.01	1.64							3		3	4		5		1	5	5	4		1	2
FALSE	High	Master Protein	A0A087EML1	2,3-bisphosphoglycerate-dependent phosphoglycerate mutase OS=Lactobacillus kunkeei OX=148814 GN=gpmA PE=3 SV=1		0	FALSE	6.874	17	3	3	3	230	26.4	5.44		5.13					2.02															2					1
FALSE	High	Master Protein	A0A088A1W8	26S proteasome non-ATPase regulatory subunit 2 OS=Apis mellifera OX=7460 GN=Psmd2 PE=3 SV=1		0	FALSE	15.465	6	4	5	4	892	98.6	5.52				2.26					6.68															1					4
FALSE	High	Master Protein	A0A088AQJ5	2-methoxy-6-polyprenyl-1,4-benzoquinol methylase, mitochondrial OS=Apis mellifera OX=7460 GN=coq5 PE=3 SV=1		0.001	FALSE	3.383	5	1	1	1	275	31.9	6.95											2.46																				1
FALSE	High	Master Protein	A0A088A189	2-oxoacid_dh domain-containing protein OS=Apis mellifera OX=7460 PE=4 SV=1		0	FALSE	72.703	39	9	104	9	311	33.8	9.45	28.32		68.56	8.77	8.95	11.6		7.32	13.65	10.44	27.01		4.87	11.15					4.59		7		8	4	3	8		3	8	3	5		2	3
FALSE	High	Master Protein	A0A084X126	30S ribosomal protein S1 OS=Serratia marcescens OX=615 GN=rpsA PE=3 SV=1		0	FALSE	4.718	3	1	1	1	557	61.2	5			2.49																				1
FALSE	High	Master Protein	A0A086FJL8	30S ribosomal protein S10 OS=Serratia marcescens OX=615 GN=rpsJ PE=3 SV=1		0	FALSE	5.071	14	1	1	1	103	11.8	9.86			2																				1
FALSE	High	Master Protein	A0A0P0QIA0	30S ribosomal protein S2 OS=Serratia marcescens OX=615 GN=rpsB PE=3 SV=1		0	FALSE	4.059	4	1	7	1	241	26.6	8.13		1.63	1.94				1.75	3.53														1	1				1	1
FALSE	High	Master Protein	A0A093S414	30S ribosomal protein S3 OS=Pectobacterium carotovorum subsp. carotovorum OX=555 GN=rpsC PE=3 SV=1		0	FALSE	5.914	5	1	2	1	233	26.1	10.2			3.04	1.88																			1	1
FALSE	High	Master Protein	A0A0P0Q7M8	30S ribosomal protein S4 OS=Serratia marcescens OX=615 GN=rpsD PE=3 SV=1		0.002	FALSE	2.733	6	1	1	1	206	23.6	10.02			0																				1
FALSE	High	Master Protein	A0A093RV71	30S ribosomal protein S6 OS=Pectobacterium carotovorum subsp. carotovorum OX=555 GN=rpsF PE=3 SV=1		0.003	FALSE	2.609	8	1	2	1	130	15	5.38			2.33																				1
FALSE	High	Master Protein	A0A088AET4	3-hydroxyisobutyryl-CoA hydrolase, mitochondrial OS=Apis mellifera OX=7460 GN=LOC412796 PE=3 SV=1		0	FALSE	136.826	58	24	169	24	440	48.7	8.75	44.65		75.91	0		8.5			9.6	1.89	99.93		0	4.07				2.09			17		18	2		9			12	4	19		2	7
FALSE	High	Master Protein	A0A088A5I5	40S ribosomal protein S24 OS=Apis mellifera OX=7460 GN=LOC408799 PE=3 SV=1		0	FALSE	6.536	11	1	9	1	132	15.3	10.89			6.98	3.04		0			2.35	5.49	0												1	1		1			1	1	1
FALSE	High	Master Protein	A0A088AD55	40S ribosomal protein S3a OS=Apis mellifera OX=7460 GN=RpS3A PE=3 SV=1		0	FALSE	9.744	13	3	3	3	267	30	9.66						0					2.87															1					2
FALSE	High	Master Protein	A0A088AHT9	40S ribosomal protein S4 OS=Apis mellifera OX=7460 GN=LOC550651 PE=3 SV=1		0	FALSE	29.433	25	6	54	6	262	29.4	10.24	1.77	0	23.72	11.55	1.96	4.25		1.96	7.11	14.23	19.3		3.88	2.02	0						3	1	5	4	1	2		1	2	3	5		1	1
FALSE	High	Master Protein	A0A088AFT2	40S ribosomal protein S6 OS=Apis mellifera OX=7460 GN=LOC725647 PE=3 SV=1		0	FALSE	4.576	6	1	1	1	251	28.9	10.95											2.68																				1
FALSE	High	Master Protein	A0A088A8A7	40S ribosomal protein S7 OS=Apis mellifera OX=7460 GN=RpS7 PE=3 SV=1		0	FALSE	12.049	15	3	24	3	214	24.6	9.76			5.58	3.78		2.08			2.17	4.2	2.29		1.87	2.07									2	1		1			1	1	2		1	1
FALSE	High	Master Protein	A0A087ZV06	40S ribosomal protein S8 OS=Apis mellifera OX=7460 GN=Rps8 PE=3 SV=1		0	FALSE	13.842	19	3	3	3	208	23.9	10.59											7.89																				3
FALSE	High	Master Protein	T0L9B2	40s ribosomal protein s9 OS=Nosema apis BRL 01 OX=1037528 GN=NAPIS_ORF01340 PE=4 SV=1		0	FALSE	5.319	5	1	164	1	187	22	9.58	1.97		3.69			3.71			1.92		1.2	1.64	9.01	0		1.75	0	120.55	1.92	1.89	1		1			1			1		1	1	1	1
FALSE	High	Master Protein	A0A087ZXD5	40S ribosomal protein SA OS=Apis mellifera OX=7460 GN=RpSA PE=3 SV=1		0	FALSE	21.245	17	4	31	4	310	33.7	5.05	0		0	4.22	0	2.52		0	5.24	2.56	7.61			0							1		1	3	1	2		1	4	2	3			1
FALSE	High	Master Protein	A0A093SBV7	50S ribosomal protein L1 OS=Pectobacterium carotovorum subsp. carotovorum OX=555 GN=rplA PE=3 SV=1		0	FALSE	5.155	5	1	1	1	234	24.7	9.61			3.04																				1
FALSE	High	Master Protein	A0A093UQ21	50S ribosomal protein L10 OS=Pectobacterium carotovorum subsp. carotovorum OX=555 GN=rplJ PE=3 SV=1		0	FALSE	10.3	21	2	2	2	165	17.8	8.98			6.6																				2
FALSE	High	Master Protein	A0A093SBE1	50S ribosomal protein L2 OS=Pectobacterium carotovorum subsp. carotovorum OX=555 GN=rplB PE=3 SV=1		0	FALSE	13.875	11	2	3	2	273	29.9	10.93			7.24			0																	2			1
FALSE	High	Master Protein	A0A080UXX3	50S ribosomal protein L20 OS=Serratia marcescens OX=615 GN=rplT PE=3 SV=1		0.001	FALSE	3.13	8	1	1	1	118	13.5	11.47			1.9																				1
FALSE	High	Master Protein	A0A0G8B608	50S ribosomal protein L4 OS=Serratia marcescens OX=615 GN=rplD PE=3 SV=1		0.009	FALSE	2.294	4	1	1	1	201	22.1	9.67			0																				1
FALSE	High	Master Protein	A0A086FJK5	50S ribosomal protein L5 OS=Serratia marcescens OX=615 GN=rplE PE=3 SV=1		0	FALSE	7.114	8	1	1	1	179	20.2	9.51			3.71																				1
FALSE	High	Master Protein	A0A087ENU3	50S ribosomal protein L7/L12 OS=Lactobacillus kunkeei OX=148814 GN=rplL PE=3 SV=1		0.007	FALSE	2.349	9	1	1	1	120	12.5	4.54		2.08																				1
FALSE	High	Master Protein	A0A086FBY2	50S ribosomal protein L7/L12 OS=Serratia marcescens OX=615 GN=rplL PE=3 SV=1		0	FALSE	4.533	9	1	2	1	121	12.3	4.65				1.84		0																		1		1
FALSE	High	Master Protein	A0A086FJA0	50S ribosomal protein L9 OS=Serratia marcescens OX=615 GN=rplI PE=3 SV=1		0.003	FALSE	2.596	10	1	1	1	150	15.8	6.33				1.67																				1
FALSE	High	Master Protein	A0A087ZZV1	5-demethoxyubiquinone hydroxylase, mitochondrial OS=Apis mellifera OX=7460 GN=Coq7 PE=3 SV=1		0	FALSE	11.546	17	3	4	3	195	21.7	6.64											2.77		6.71																		1		3
FALSE	High	Master Protein	A0A093SRC3	60 kDa chaperonin OS=Pectobacterium carotovorum subsp. carotovorum OX=555 GN=groL PE=3 SV=1		0	FALSE	11.367	6	4	12	4	548	57	4.91		2.2	8.78				11.7	2.96											2.07			1	4				2	1
FALSE	High	Master Protein	A0A087ZPA5	60S acidic ribosomal protein P0 OS=Apis mellifera OX=7460 GN=RpLP0 PE=3 SV=1		0.002	FALSE	2.691	3	1	5	1	317	34.4	6				0					1.78		1.89			0										1					1		1			1
FALSE	High	Master Protein	A0A088AH51	60S ribosomal protein L18 OS=Apis mellifera OX=7460 GN=102654426 PE=4 SV=1		0	FALSE	25.356	29	5	35	5	188	21.7	11.75	0		34.9	4.14		0		4.73	4.7	4.44	10.21			0		0					1		4	1		1		2	3	2	2			1
FALSE	High	Master Protein	A0A088A7V4	60S ribosomal protein L18a OS=Apis mellifera OX=7460 GN=RpL18A PE=3 SV=1		0	FALSE	7.155	11	2	9	2	177	21	10.7			3.07	0					0	0	3.5			0									2	1					1	1	2			1
FALSE	High	Master Protein	A0A088ACL1	60S ribosomal protein L27 OS=Apis mellifera OX=7460 GN=RpL27 PE=3 SV=1		0	FALSE	5.498	13	2	2	2	134	16.1	10.59			2.06																				2
FALSE	High	Master Protein	H9K170	60S ribosomal protein L32 OS=Apis mellifera OX=7460 GN=RpL32 PE=4 SV=1		0	FALSE	6.379	22	3	5	3	134	15.9	11.6									0	1.61	4.66																		1	1	2
FALSE	High	Master Protein	A0A088AHG6	6-phosphofructokinase OS=Apis mellifera OX=7460 PE=3 SV=1		0	FALSE	15.092	7	4	6	4	886	98.5	6.68			2.63	2.36						0													3	1						1
FALSE	High	Master Protein	A0A088AKI3	6-phosphogluconate dehydrogenase, decarboxylating OS=Apis mellifera OX=7460 GN=Pgd PE=3 SV=1		0	FALSE	20.461	15	6	30	6	482	52.9	7.46	0		13.79	9.16		0			4.51	3.59	7.31		0	0							1		3	5		1			3	4	2		1	1
FALSE	High	Master Protein	A0A087EQF2	6-phosphogluconate dehydrogenase, decarboxylating OS=Lactobacillus kunkeei OX=148814 GN=JI66_01835 PE=3 SV=1		0	FALSE	4.353	4	2	2	2	479	52.9	5.08		4.19																				2
FALSE	High	Master Protein	A0A088AJT7	Aa_trans domain-containing protein OS=Apis mellifera OX=7460 GN=LOC410741 PE=4 SV=1		0	FALSE	14.041	13	4	11	4	508	56.5	6.71	3.59		6.36			0			4.29												2		2			1			2
FALSE	High	Master Protein	A0A088AIY5	Aa_trans domain-containing protein OS=Apis mellifera OX=7460 GN=LOC552193 PE=4 SV=1		0.002	FALSE	2.827	2	1	1	1	481	53.9	7.83				2.16																				1
FALSE	High	Master Protein	A0A088A551	Aa_trans domain-containing protein OS=Apis mellifera OX=7460 GN=path PE=4 SV=1		0	FALSE	15.768	11	4	8	4	468	51.6	6.95			23.78																				4
FALSE	High	Master Protein	A0A087ZNA9	AA_TRNA_LIGASE_II domain-containing protein OS=Apis mellifera OX=7460 GN=Aats-ser PE=4 SV=1		0	FALSE	4.499	4	1	1	1	427	49.5	8.76			2.97																				1
FALSE	High	Master Protein	A0A087ZP92	AA_TRNA_LIGASE_II domain-containing protein OS=Apis mellifera OX=7460 GN=LOC412200 PE=3 SV=1		0	FALSE	4.397	2	1	1	1	714	83.3	7.03																		2.54
FALSE	High	Master Protein	A0A087ZU43	AA_TRNA_LIGASE_II domain-containing protein OS=Apis mellifera OX=7460 GN=LOC551088 PE=4 SV=1		0	FALSE	10.988	6	4	18	4	556	64.5	6.23	1.72	0	1.86	0				0	3.52	3.8	1.88		1.81	0	0						1	1	1	1				1	2	2	2		2	1
FALSE	High	Master Protein	A0A088ADF9	AA_TRNA_LIGASE_II domain-containing protein OS=Apis mellifera OX=7460 GN=LOC726436 PE=4 SV=1		0	FALSE	26.865	27	9	19	9	433	49.4	8.76	3.76		6.96								12.79										3		2								8
FALSE	High	Master Protein	A0A088AUH7	AA_TRNA_LIGASE_II domain-containing protein OS=Apis mellifera OX=7460 PE=4 SV=1		0	FALSE	14.9	13	3	4	3	422	48.3	8.05			7.81																				3
FALSE	High	Master Protein	A0A088ARS3	AAA domain-containing protein OS=Apis mellifera OX=7460 GN=bor PE=4 SV=1		0	FALSE	48.423	20	13	45	13	608	68.8	9.03	16.95		9.51	1.94		1.9			1.92		31.55			1.62		0		4.96			6		3	2		2			5		11			1
FALSE	High	Master Protein	A0A088A5P5	AAA domain-containing protein OS=Apis mellifera OX=7460 GN=LOC410289 PE=4 SV=1		0	FALSE	10.576	5	3	5	3	752	85.5	9.23			9.62								2.52												2								2
FALSE	High	Master Protein	A0A0B4J2P2	AAA domain-containing protein OS=Apis mellifera OX=7460 GN=LOC551386 PE=3 SV=1		0.002	FALSE	2.961	4	1	4	1	393	44.5	7.44				1.6		0			0		1.95													1		1			1		1
FALSE	High	Master Protein	A0A088A5D5	AAA domain-containing protein OS=Apis mellifera OX=7460 GN=LOC552166 PE=3 SV=1		0	FALSE	99.061	31	22	88	22	803	91	8.76	23.99		73.2	2.08		6.56			6.94		50.59			0		0					11		14	2		6			4		17			2
FALSE	High	Master Protein	A0A088A957	AAA domain-containing protein OS=Apis mellifera OX=7460 GN=Rpt1 PE=3 SV=1		0.003	FALSE	2.659	2	1	4	1	434	48.4	6.07	1.7		1.9	1.7		1.66															1		1	1		1
FALSE	High	Master Protein	A0A088AKS4	AAA_5 domain-containing protein OS=Apis mellifera OX=7460 PE=4 SV=1		0	FALSE	5.796	9	2	2	2	265	30.6	9.6	0										1.93										1										1
FALSE	High	Master Protein	A0A088AB81	Aamy domain-containing protein OS=Apis mellifera OX=7460 GN=AGLU-like2 PE=4 SV=1		0	FALSE	32.207	17	7	17	7	616	69.7	5.17			30.99		2.74			0															7		3			1
FALSE	High	Master Protein	A0A088AAX5	Aamy domain-containing protein OS=Apis mellifera OX=7460 PE=4 SV=1		0	FALSE	9.558	5	3	6	3	798	89.9	6.06			8.61		0						4.57												3		1						2
FALSE	High	Master Protein	A0A088ANJ8	AB hydrolase-1 domain-containing protein OS=Apis mellifera OX=7460 GN=LOC414038 PE=4 SV=1		0	FALSE	9.659	14	4	10	4	318	36	9.6	8.29		0			0					2.34			0							3		1			1					2			1
FALSE	High	Master Protein	A0A088A337	AB hydrolase-1 domain-containing protein OS=Apis mellifera OX=7460 GN=LOC552611 PE=4 SV=1		0	FALSE	4.777	7	2	2	2	388	43.8	7.55			3.96																				2
FALSE	High	Master Protein	A0A087ZYZ0	AB hydrolase-1 domain-containing protein OS=Apis mellifera OX=7460 PE=4 SV=1		0	FALSE	42.142	51	10	31	10	258	29.5	8.07	1.77		11.02			0					26.88										4		5			1					10
FALSE	High	Master Protein	A0A088AC12	AB hydrolase-1 domain-containing protein OS=Apis mellifera OX=7460 PE=4 SV=1		0	FALSE	6.37	7	2	8	2	305	35.2	8.95	0		2.08						0		4.54							1.73			1		1						1		2
FALSE	High	Master Protein	A0A088AN63	ABC transporter domain-containing protein OS=Apis mellifera OX=7460 GN=LOC414051 PE=4 SV=1		0	FALSE	7.299	3	2	2	2	703	79.2	7.58			4.3																				2
FALSE	High	Master Protein	A0A088AHK0	Abhydrolase_2 domain-containing protein OS=Apis mellifera OX=7460 GN=LOC409201 PE=4 SV=1		0	FALSE	25.997	41	7	11	7	219	23.8	7.53	5.92										9.17										4										4
FALSE	High	Master Protein	A0A088A0H1	Abhydrolase_2 domain-containing protein OS=Apis mellifera OX=7460 GN=LOC725796 PE=4 SV=1		0	FALSE	4.587	13	2	2	2	229	25.8	7.09													0																				2
FALSE	High	Master Protein	A0A088ADC5	AcetylCoA_hyd_C domain-containing protein OS=Apis mellifera OX=7460 PE=4 SV=1		0	FALSE	86.482	37	12	129	12	448	49.6	7.81	52.53	1.6	69.96	3.76	1.76	11.74		3.53	26.15	12.62	45.21		7.79	3.38	0	1.64		1.82	6.63		9	1	10	3	1	5		1	6	3	10		1	3
FALSE	High	Master Protein	A0A087ZXK3	Aconitate hydratase, mitochondrial OS=Apis mellifera OX=7460 GN=LOC408446 PE=3 SV=1		0	FALSE	245.868	52	35	183	35	788	85.9	8.44	96.73		13.97	5.94		69.01			11.03	2.05	156.19			5.49		22.54					24		5	5		23			7	1	27			5
FALSE	High	Master Protein	O15560	Actin (Fragment) OS=Antonospora locustae OX=278021 GN=ACT1 PE=3 SV=1		0	FALSE	14.575	15	3	44	1	327	36.3	6.19	5.02		16.31	7.65		7.2		2.06	4.46	5.6	6.23			5.06	0	14.51					1		2	1		1		1	1	1	1			1
FALSE	High	Master Protein	A0A088AJ79	Actin-related protein 2 OS=Apis mellifera OX=7460 GN=LOC409313 PE=3 SV=1		0.002	FALSE	2.757	4	2	4	1	406	46	6.47			0	0				0		0													1	1				1		1
FALSE	High	Master Protein	A0A087ZYS4	Actin-related protein 2/3 complex subunit 3 OS=Apis mellifera OX=7460 GN=Arpc3A PE=3 SV=1		0.002	FALSE	2.811	7	1	3	1	177	20.2	8.51				0					0	0														1					1	1
FALSE	High	Master Protein	A0A088A168	Actin-related protein 2/3 complex subunit 4 OS=Apis mellifera OX=7460 GN=Arpc4 PE=3 SV=1		0	FALSE	9.231	13	2	3	2	168	19.7	8.57			1.97	4.28																			1	2
FALSE	High	Master Protein	A0A088A6E7	Actin-related protein 2/3 complex subunit 5 OS=Apis mellifera OX=7460 GN=p16-ARC PE=3 SV=1		0.004	FALSE	2.515	5	1	2	1	157	17.3	5.64				0					0															1					1
FALSE	High	Master Protein	A0A088A9T8	Actin-related protein 2/3 complex subunit OS=Apis mellifera OX=7460 GN=Sop2 PE=3 SV=1		0	FALSE	8.782	11	3	5	3	368	41	7.46			1.76	1.93														1.89					1	2
FALSE	High	Master Protein	A0A088AVR3	Acyl carrier protein OS=Apis mellifera OX=7460 PE=3 SV=1		0	FALSE	13.633	21	4	36	4	187	21.5	8.43	12.23		14.09	11.96		3.66			10.57	2.28	8.89					0					3		3	3		2			4	2	2
FALSE	High	Master Protein	A0A087EN52	Acyl carrier protein OS=Lactobacillus kunkeei OX=148814 GN=acpP PE=3 SV=1		0.001	FALSE	3.922	19	1	1	1	80	9.1	3.99		2.72																				1
FALSE	High	Master Protein	A0A087ZVT1	Acyl-coenzyme A oxidase OS=Apis mellifera OX=7460 GN=LOC412020 PE=3 SV=1		0	FALSE	24.637	15	7	19	7	676	77	7.8	0		9.07						0	0	3.78			0							3		4						3	1	3			1
FALSE	High	Master Protein	A0A088ARZ1	Acyl-coenzyme A oxidase OS=Apis mellifera OX=7460 PE=3 SV=1		0	FALSE	5.85	2	1	1	1	663	75	7.46			2.73																				1
FALSE	High	Master Protein	A0A0B4J2L5	Adenylate kinase OS=Apis mellifera OX=7460 GN=Adk2 PE=3 SV=1		0	FALSE	5.557	8	2	13	2	252	28.5	8.05	1.76		1.76	1.82		0			0	1.63	8.33		0								1		1	1		1			1	1	2		1
FALSE	High	Master Protein	A0A087ZPC0	Adenylyl cyclase-associated protein OS=Apis mellifera OX=7460 GN=LOC410158 PE=4 SV=1		0	FALSE	23.752	6	4	22	4	767	85.1	5.36	0	7.07		5.27				0	9.88		2.29	3.81	1.78	0			1.8	8.18			1	2		1				1	2		1	2	1	1
FALSE	High	Master Protein	A0A088AUH4	ADF-H domain-containing protein OS=Apis mellifera OX=7460 GN=LOC725718 PE=3 SV=1		0	FALSE	22.939	45	6	34	6	148	16.8	6.57	6.29		2.26	6.67		3.63			7.28	1.86	2.12		5.19	1.92	2.54	2.3	2.74	7.94	1.88		3		1	3		2			5	1	3		2	1
FALSE	High	Master Protein	Q6VQ13	ADP/ATP translocase OS=Apis mellifera OX=7460 GN=Ant PE=2 SV=1		0	FALSE	155.908	81	22	637	22	300	33	9.69	135.96	7.92	310.55	70.49	46.09	66.49		51.19	114.59	69.19	176.71	0	25.16	51.79	13.97	6.83	2.07	8.22	4.78	0	19	4	21	17	14	16		17	20	15	20	3	9	15
FALSE	High	Master Protein	A0A088ACS2	Aldedh domain-containing protein OS=Apis mellifera OX=7460 GN=Aldh PE=3 SV=1		0	FALSE	201.042	68	26	240	26	510	55.7	7.14	132.87		96.48	2.07		65.28			24.27	4.68	192.97		4.84	8.02		1.93					24		16	2		22			12	3	25		2	6
FALSE	High	Master Protein	A0A087ZNH4	Aldedh domain-containing protein OS=Apis mellifera OX=7460 GN=LOC409736 PE=4 SV=1		0	FALSE	43.44	27	10	24	10	520	56	8.03	7.84	4.15	11.08			0			0		21.23					0					5	1	3			1			1		7
FALSE	High	Master Protein	A0A088AAD1	Aldedh domain-containing protein OS=Apis mellifera OX=7460 GN=Ssadh PE=4 SV=1		0	FALSE	168.854	50	23	192	23	503	55.6	8.4	74.64	1.82	114.7	8.87		26.65		2.17	21.15	15.65	135.8		14.46	5.9		0					17	1	19	8		11		1	10	3	21		3	2
FALSE	High	Master Protein	A0A088AID7	Aldedh domain-containing protein OS=Apis mellifera OX=7460 PE=3 SV=1		0	FALSE	8.955	5	2	3	1	487	52.9	5.8			3.06	1.67																			1	2
FALSE	High	Master Protein	A0A088ANX1	Aldehyde dehydrogenase OS=Apis mellifera OX=7460 PE=3 SV=1		0	FALSE	78.875	41	19	79	19	551	62.3	7.33	2.01	60.86	37.74	0	0	2.06	5.39		8.6		11.3							5.19			2	15	10	2	1	3	3		5		6
FALSE	High	Master Protein	A0A087ZZ66	Aldo_ket_red domain-containing protein OS=Apis mellifera OX=7460 GN=LOC411202 PE=4 SV=1		0	FALSE	6.513	12	3	4	3	321	37.2	7.87				0					1.61															1					3
FALSE	High	Master Protein	A0A088AGI6	Aldo_ket_red domain-containing protein OS=Apis mellifera OX=7460 GN=LOC412163 PE=4 SV=1		0	FALSE	86.144	70	16	273	15	311	35.2	7.87	13.34	40.88	2.63	38.77	13.41	16.76	13.14	4.13	28.01	8.96	10.9	15.79	49.64	13.36	4.22	0	48.76	147.33	1.7		6	9	1	9	5	7	4	7	9	3	3	5	10	6
FALSE	High	Master Protein	A0A088AGI8	Aldo_ket_red domain-containing protein OS=Apis mellifera OX=7460 GN=LOC551968 PE=4 SV=1		0	FALSE	83.331	71	17	155	17	318	36.1	6.73	36.16	8.3	7.99	25.64	9.95	12.68		0	13	2.32	49.37		6.59	4.59	2.2	1.73	9.94	68.35	0		10	3	3	12	4	7		1	7	2	13		4	2
FALSE	High	Master Protein	A0A088AGI5	Aldo_ket_red domain-containing protein OS=Apis mellifera OX=7460 PE=4 SV=1		0	FALSE	19.862	25	6	12	5	318	36.4	7.09		4.14		4.23					5.79		0						1.9	2.26				1		2					4		1
FALSE	High	Master Protein	A0A088AEU8	Aldolase_II domain-containing protein OS=Apis mellifera OX=7460 GN=LOC409713 PE=4 SV=1		0	FALSE	22.761	6	4	15	4	1325	150.9	5.08			10.2	6.3					9.39	2.27													2	2					2	2
FALSE	High	Master Protein	A0A088AME9	Alkaline phosphatase OS=Apis mellifera OX=7460 GN=LOC410530 PE=3 SV=1		0	FALSE	10.504	7	3	3	3	534	59.4	7.87			2.17															4.19					1
FALSE	High	Master Protein	A0A088AUU8	Alkaline phosphatase OS=Apis mellifera OX=7460 GN=LOC551687 PE=3 SV=1		0	FALSE	6.242	6	2	5	2	556	62.3	6.95							2.45					2.89					2.32	2.48									1					2
FALSE	High	Master Protein	A0A088A8P3	Alkylglycerone-phosphate synthase OS=Apis mellifera OX=7460 PE=3 SV=1		0	FALSE	11.899	7	3	8	3	562	63.3	8.09			11.77	3.44		2.12				3.35						0							2	1		2				1
FALSE	High	Master Protein	A0A087ZVF4	Alpha-1,4 glucan phosphorylase OS=Apis mellifera OX=7460 GN=GlyP PE=3 SV=1		0.003	FALSE	2.622	2	1	1	1	844	97.3	6.37						0																				1
FALSE	High	Master Protein	Q9U8X5	Alpha-amylase OS=Apis mellifera OX=7460 PE=2 SV=1		0	FALSE	11.794	11	4	8	4	493	55.9	7.34	0	2.84					1.82					3.7					4.58	0			1	1					1					1
FALSE	High	Master Protein	A0A088A332	Alpha-galactosidase OS=Apis mellifera OX=7460 PE=3 SV=1		0	FALSE	40.04	20	9	50	9	388	44.6	5.3	3.63	7.6		1.7	2.57		5.42		1.93			16.17	12.47				33.99	29.86			2	2		1	1		2		1			5	6
FALSE	High	Master Protein	Q25BT8	Alpha-glucosidase OS=Apis mellifera OX=7460 GN=hbg1 PE=4 SV=1		0	FALSE	701.808	60	48	5914	48	588	67.3	6.61	708.12	287.83	425.69	419.8	744.9	319.27	221.32	773.52	228.9	399.41	891.59	229.47	1362.22	386.58	337.81	689.15	1132.06	3841.97	811.71	160.17	38	28	34	37	38	35	21	39	33	36	38	28	43	36
FALSE	High	Master Protein	Q25BT7	Alpha-glucosidase OS=Apis mellifera OX=7460 GN=hbg2 PE=4 SV=1		0	FALSE	201.122	40	21	525	1	580	66.5	6.28	63.22	125.93	40.58	153.9	193.55	26.84	61.04	161.28	139.31	52.42	22.97	2.61	109.35	22.12		2.71	27.28	38.22		8.56	11	10	8	17	19	4	7	17	19	10	4	2	10	6
FALSE	High	Master Protein	Q17058	Alpha-glucosidase OS=Apis mellifera OX=7460 PE=1 SV=1		0	FALSE	4.885	4	2	4	2	567	65.5	5.24		2.37			1.75												4.09					1			1
FALSE	High	Master Protein	A0A0B4J2P5	Alpha-glucosidase OS=Apis mellifera OX=7460 PE=4 SV=1		0	FALSE	193.199	40	21	507	1	580	66.6	6.28	57.59	125.93	40.84	146.47	182.69	26.84	61.04	147.63	130.32	48.64	22.97	2.61	109.35	22.12		2.71	27.28	38.22		6.37	10	10	8	16	18	3	7	16	18	9	4	2	10	6
FALSE	High	Master Protein	A0A087ZZ79	Alpha-mannosidase OS=Apis mellifera OX=7460 PE=3 SV=1		0	FALSE	25.282	10	7	14	7	1012	117.8	6.52	3.42												3.82				4.94	20.55			2												1
FALSE	High	Master Protein	A0A088A624	Amino acid transporter OS=Apis mellifera OX=7460 PE=3 SV=1		0	FALSE	33.19	17	5	28	5	486	52.9	6.57		8.11	41.57	5.32		3.33	2.39	4.1		3					0							1	5	1		1	1	1		2
FALSE	High	Master Protein	A0A087ZSE6	Aminomethyltransferase OS=Apis mellifera OX=7460 GN=LOC410550 PE=3 SV=1		0.001	FALSE	3.141	3	1	1	1	455	49.6	9.42			1.79																				1
FALSE	High	Master Protein	A0A087ZUB3	Aminopeptidase OS=Apis mellifera OX=7460 GN=LOC551180 PE=3 SV=1		0	FALSE	538.046	61	55	3413	55	928	108	6.76	416.57	361.86	221.9	217.11	654.52	265.09	143.32	391.29	127.09	298.57	601.83	246.06	523.27	194.46	147.82	403.27	519.81	1536.68	316.7	94.25	41	34	31	36	42	38	21	37	28	34	41	32	39	39
FALSE	High	Master Protein	A0A087ZUB2	Aminopeptidase OS=Apis mellifera OX=7460 GN=LOC551224 PE=3 SV=1		0	FALSE	14.035	4	3	5	3	914	106	6.29									1.65								3.86	9.48											1
FALSE	High	Master Protein	A0A087ZTK0	Aminopeptidase OS=Apis mellifera OX=7460 GN=Psa PE=3 SV=1		0	FALSE	70.531	25	17	43	17	867	98.5	5.54	1.99	5.17		2.98							9.66	3.09	10.8	4.92			0	70.41			2	3		1							4	1	4	2
FALSE	High	Master Protein	A0A088AI92	Aminopeptidase OS=Apis mellifera OX=7460 PE=3 SV=1		0	FALSE	24.814	12	9	15	9	919	104.9	6.43		8.1											6.41					16.32				4											4
FALSE	High	Master Protein	A0A087ZNZ2	Aminotran_1_2 domain-containing protein OS=Apis mellifera OX=7460 GN=LOC409196 PE=4 SV=1		0	FALSE	93.147	44	18	85	18	543	60.8	8.32	42.7		21.98	11.46		15.28			4.58	4.37	63.39			0							14		7	3		9			4	2	14			1
FALSE	High	Master Protein	A0A088ADX3	Aminotran_5 domain-containing protein OS=Apis mellifera OX=7460 GN=LOC412670 PE=3 SV=1		0	FALSE	38.833	33	11	31	11	371	41.4	8.15		11.69		4.37	1.85		2.16					3.39	2.08				6.5	29.9				4		2	1		1					1	1
FALSE	High	Master Protein	A0A087ZV52	AMP-binding domain-containing protein OS=Apis mellifera OX=7460 GN=LOC409515 PE=4 SV=1		0	FALSE	15.06	8	4	5	4	715	80.8	8.32			6.93			2.46					0												3			1					1
FALSE	High	Master Protein	A0A087ZRC1	Angiotensin-converting enzyme OS=Apis mellifera OX=7460 PE=3 SV=1		0	FALSE	17.273	10	5	8	5	621	72.6	5.97		3.85		0					0			0	0				2.24	4.71				1		1					1			1	1
FALSE	High	Master Protein	A0A087ZTR6	Anion exchange protein OS=Apis mellifera OX=7460 GN=LOC409792 PE=3 SV=1		0	FALSE	3.993	1	1	1	1	1281	142.7	6.46			1.95																				1
FALSE	High	Master Protein	A0A088A1W4	Annexin OS=Apis mellifera OX=7460 GN=LOC409068 PE=3 SV=1		0	FALSE	58.627	31	14	57	14	508	56.5	5.55		38.29		2.61	2.66		1.89	22.77		1.74	2.09		25.97				2.09	9.71				8		2	3		2	7		1	2		6
FALSE	High	Master Protein	A0A088AJH1	Annexin OS=Apis mellifera OX=7460 GN=LOC409533 PE=3 SV=1		0	FALSE	43.052	40	10	28	9	323	35.9	4.74	1.64	34.36	2.1	6.35			4.2		4.92		4.68							2.15			2	8	1	3			2		3		3
FALSE	High	Master Protein	A0A087ZR92	Annexin OS=Apis mellifera OX=7460 PE=3 SV=1		0	FALSE	121.443	63	18	195	17	323	35.7	5.48		55.6	0	14.27	23.66	0	17.99	73.51	1.81	6.63	1.97	5.07	61.26		13.88		5.28	49.47	9.19	0		10	1	7	6	1	4	13	3	3	3	4	12
FALSE	High	Master Protein	Q8I6X7	Antennal-specific protein 3c OS=Apis mellifera OX=7460 GN=ASP3c PE=2 SV=1		0	FALSE	18.962	33	5	11	5	130	14.9	7.68	0			6.39					2.69	3.11											1			2					4	1
FALSE	High	Master Protein	A0A088AH86	AP complex subunit beta OS=Apis mellifera OX=7460 PE=3 SV=1		0	FALSE	4.799	1	1	1	1	918	101.3	5.27																		1.96
FALSE	High	Master Protein	A0A088AG11	AP complex subunit sigma OS=Apis mellifera OX=7460 PE=3 SV=1		0.003	FALSE	2.676	8	1	5	1	111	13.3	8.98	0		1.89	2					2.17												1		1	1					1
FALSE	High	Master Protein	A0A088A893	AP_endonuc_2 domain-containing protein OS=Apis mellifera OX=7460 PE=4 SV=1		0	FALSE	13.948	33	4	14	4	156	18	6.38	2.44	9.83				0			0		1.85		3.16	0				8.56			1	2				1			1		1		2	2
FALSE	High	Master Protein	A0A088ACY2	AP-1 complex subunit gamma OS=Apis mellifera OX=7460 PE=3 SV=1		0	FALSE	5.764	2	1	7	1	809	90.2	7.96			3.66	0		0			2.8	0													1	1		1			1	1
FALSE	High	Master Protein	A0A088APJ2	AP-2 complex subunit alpha OS=Apis mellifera OX=7460 GN=alpha-Adaptin PE=3 SV=1		0	FALSE	5.806	3	3	3	3	937	104.9	7.21			2.21	1.8						0													1	1						1
FALSE	High	Master Protein	A0A088AFU6	ApaG domain-containing protein OS=Apis mellifera OX=7460 PE=4 SV=1		0.002	FALSE	2.705	3	1	2	1	313	36.3	8.9			2.14								2.22												1								1
FALSE	High	Master Protein	A0A088ANC5	APD-3-like protein; Apidermin 1-like protein; Apidermin 3-like protein OS=Apis mellifera OX=7460 GN=apd-3 PE=4 SV=1		0	FALSE	51.209	27	3	99	3	275	24.2	7.56	44.17	3	16.93	9.68	6.95	17.19	3.28	14.51	1.87	14.75	15.47	3.39		16.63	15.9	2.47	5.15	71.08	20.22	1.99	3	1	3	2	2	2	1	3	1	3	2	1		2
FALSE	High	Master Protein	B0LUE8	Apolipophorin-III-like protein OS=Apis mellifera OX=7460 GN=A4 PE=2 SV=1		0	FALSE	25.814	45	5	45	5	193	21.3	5.66	19.24		1.91	19.69	0	5.56			1.68	4.35	14.42			10.99	1.97				0		5		1	5	1	3			3	2	5			4
FALSE	High	Master Protein	B5APR7	Apyrase OS=Apis mellifera OX=7460 PE=2 SV=1		0	FALSE	12.507	9	3	5	3	567	63.4	6.43			0									2.35					8.08						1									1
FALSE	High	Master Protein	A0A088ARZ8	Arginine kinase OS=Apis mellifera OX=7460 PE=3 SV=1		0	FALSE	147.146	54	18	252	18	383	43.4	6.55	32.06	6.4	145.21	64.56	3.19	39.51	2.92	13.91	37.15	34.03	88.87	4.34	16.35	17.8	13.18	8.77	2.53	23.44	4.48		9	2	17	14	1	11	1	4	13	10	14	2	3	10
FALSE	High	Master Protein	A0A088AM48	Arp2/3 complex 34 kDa subunit OS=Apis mellifera OX=7460 GN=Arc-p34 PE=3 SV=1		0	FALSE	11.305	4	1	16	1	306	35.8	7.68	2.32		3.02	7.02		0			4.9	7.12	3.17			2.22							1		1	1		1			1	1	1			1
FALSE	High	Master Protein	A0A087ZUT4	Arrestin_C domain-containing protein OS=Apis mellifera OX=7460 GN=409006 PE=4 SV=1		0	FALSE	15.101	15	4	5	4	492	54.2	5.62									3.66																				4
FALSE	High	Master Protein	A0A088A4B2	Aspartate aminotransferase OS=Apis mellifera OX=7460 GN=Got2 PE=4 SV=1		0	FALSE	99.017	37	14	94	14	429	48	9.22	44.5		49.1	6.86		15.55			11.98		63.49					0					12		9	6		8			8		14
FALSE	High	Master Protein	A0A088ASL4	Aspartate aminotransferase OS=Apis mellifera OX=7460 PE=4 SV=1		0	FALSE	47.435	41	9	46	9	365	41.5	7.24	0		16.87	19.6		0			8.74	2.17	1.69			0	1.85	1.95			0		1		6	8		4			7	1	3			1
FALSE	High	Master Protein	A0A087EPN4	Aspartyl/glutamyl-tRNA(Asn/Gln) amidotransferase subunit C OS=Lactobacillus kunkeei OX=148814 GN=gatC PE=3 SV=1		0	FALSE	3.932	16	1	1	1	101	11.1	4.12		2.99																				1
FALSE	High	Master Protein	M9SXX0	ATP synthase alpha subunit (Fragment) OS=Lactobacillus apis OX=303541 GN=atpA PE=4 SV=1		0	FALSE	17.736	8	2	28	1	303	32.8	5.06	12.56		22.28	2.71		7.45			14.92	2.86	11.04			0							1		1	1		1			2	1	1			1
FALSE	High	Master Protein	R9PX37	ATP synthase beta subunit (Fragment) OS=Serratia entomophila OX=42906 GN=atpD PE=4 SV=1		0.001	FALSE	3.4	5	1	1	1	214	23.4	5.47			2.05																				1
FALSE	High	Master Protein	A0A343ITD7	ATP synthase subunit a OS=Apis mellifera syriaca OX=279977 PE=4 SV=1		0	FALSE	6.712	8	2	15	2	226	26.6	8.94	1.74		5.34	0		0			2.42	1.69	2.22		3.34								2		2	1		1			2	1	1		1
FALSE	High	Master Protein	A0A087ZQI5	ATP synthase subunit alpha OS=Apis mellifera OX=7460 GN=Atp5a1 PE=3 SV=1		0	FALSE	213.59	58	29	347	28	547	59.5	8.9	88.69		221.58	75.24		55.76		7.07	141.13	41.91	78.89			19.02	6.32	22.12			0		18		23	17		17		5	22	13	16			10
FALSE	High	Master Protein	A0A093SBP3	ATP synthase subunit alpha OS=Pectobacterium carotovorum subsp. carotovorum OX=555 GN=atpA PE=3 SV=1		0	FALSE	17.798	6	2	28	1	513	55.3	5.69	12.56		25.07	2.71		7.45			12.85	2.86	11.04			0							1		2	1		1			1	1	1			1
FALSE	High	Master Protein	A0A088AMB8	ATP synthase subunit beta OS=Apis mellifera OX=7460 GN=Atp5b PE=3 SV=1		0	FALSE	294.931	73	26	363	26	516	55.1	5.41	93.3		235.17	92.53		78.92		19.23	150.14	49.18	100.94		0	20.1	9.82	20.51			2.35		18		23	21		20		8	24	15	17		1	11
FALSE	High	Master Protein	A0A087ENJ2	ATP synthase subunit beta OS=Lactobacillus kunkeei OX=148814 GN=atpD PE=3 SV=1		0	FALSE	7.728	6	2	8	2	468	50.9	4.75		0	10.65	1.72					1.86													1	1	1					1
FALSE	High	Master Protein	A0A087ZS51	ATP synthase subunit d, mitochondrial OS=Apis mellifera OX=7460 GN=ATPsyn-d PE=3 SV=1		0	FALSE	90.768	75	13	100	13	174	20.3	5.12	10.16		77.84	19.39		3.82			54.4	9.35	19.79		0	0		0					4		10	7		3			12	5	6		1	1
FALSE	High	Master Protein	A0A088ACY7	ATP synthase subunit gamma OS=Apis mellifera OX=7460 GN=Atp5c1 PE=3 SV=1		0	FALSE	90.369	46	12	132	12	296	32.8	9.42	29.39		102.3	33.16	0	12.76		1.83	38.48	3.92	34.48		0	2.07		5.48					6		11	8	1	7		2	10	3	8		1	3
FALSE	High	Master Protein	A0A088A2G0	ATP synthase subunit OS=Apis mellifera OX=7460 PE=3 SV=1		0	FALSE	25.823	47	6	113	6	107	12.2	9.83	15.3		54.02	11.68	6.4	3.91		8.56	20.41	11.71	21.2		11.26	4.04		1.8			1.85	3.33	5		6	5	3	3		5	5	5	6		4	2
FALSE	High	Master Protein	A0A087ZY48	ATPase ASNA1 homolog OS=Apis mellifera OX=7460 GN=LOC409264 PE=3 SV=1		0	FALSE	7.443	5	1	2	1	339	38.3	5.29									2.87	0																			1	1
FALSE	High	Master Protein	A0A088ARD2	ATP-citrate synthase OS=Apis mellifera OX=7460 GN=ATPCL PE=3 SV=1		0	FALSE	74.481	15	16	87	16	1086	120	7.74	9.89		29.04	16.49	2.46	8.86		2.46	21	14.44	30.12		5.83	4.78	2.12	1.93			0		5		7	7	1	5		1	11	7	10		3	4
FALSE	High	Master Protein	A0A087ZZ68	ATP-grasp_2 domain-containing protein OS=Apis mellifera OX=7460 PE=4 SV=1		0	FALSE	60.898	48	12	44	10	322	36.1	5.66	15.93		15.45			1.91					35.02					1.64					8		6			3					11
FALSE	High	Master Protein	A0A088AHV3	ATP-synt_DE_N domain-containing protein OS=Apis mellifera OX=7460 GN=Atp5d PE=3 SV=1		0	FALSE	7.284	36	3	4	3	161	17.6	5.17			2.06						0														2						1
FALSE	High	Master Protein	A0A088AN03	B5 domain-containing protein OS=Apis mellifera OX=7460 GN=LOC551101 PE=4 SV=1		0	FALSE	5.481	2	1	9	1	590	67.5	6.29	0		2.79	2.12		0				0	2.93			0							1		1	1		1				1	1			1
FALSE	High	Master Protein	A0A088APR0	Bac_surface_Ag domain-containing protein OS=Apis mellifera OX=7460 GN=LOC413450 PE=4 SV=1		0	FALSE	82.931	39	14	102	14	483	54	9.09	28.8		53.99	6.37	15.97	2.34		16.2	9.76	4.33	42.1		14.88	0	0			7.48	0		7		9	3	3	1		7	4	2	9		5	2
FALSE	High	Master Protein	A0A088AEB3	Battenin OS=Apis mellifera OX=7460 GN=cln3 PE=3 SV=1		0	FALSE	10.456	7	2	4	2	425	47.1	7.87			12.68																				2
FALSE	High	Master Protein	A0A088AMU5	BcrAD_BadFG domain-containing protein OS=Apis mellifera OX=7460 GN=LOC551847 PE=4 SV=1		0	FALSE	13.972	13	4	6	4	417	47.3	6.99		5.43															2.42	1.86				2
FALSE	High	Master Protein	A0A088AV21	Bestrophin homolog OS=Apis mellifera OX=7460 GN=LOC411764 PE=3 SV=1		0	FALSE	6.7	3	2	6	2	707	79.2	7.02	0		8.21			0					0										1		2			1					1
FALSE	High	Master Protein	A0A088AJN6	Beta-glucuronidase OS=Apis mellifera OX=7460 GN=LOC409814 PE=3 SV=1		0	FALSE	19.231	10	6	11	6	669	76.9	6.11		4.25	6.52	0								1.63						7.08				1	3	2								1
FALSE	High	Master Protein	A0A087ZUU5	Beta-hexosaminidase OS=Apis mellifera OX=7460 PE=3 SV=1		0	FALSE	118.531	46	17	248	17	541	61.3	6.99	3.96	35.8	30.26	11.33	100.88	3.43	12.24	68.17	10.64	13.16	6.23	13.27	54.7	0	10.84	0	32.46	72.11			3	6	7	8	16	3	4	15	5	8	4	6	12	1
FALSE	High	Master Protein	A0A088A3T9	BRICHOS domain-containing protein OS=Apis mellifera OX=7460 GN=LOC409366 PE=4 SV=1		0	FALSE	9.436	6	1	4	1	317	36.4	8.59	0		2.69								0										1		1								1
FALSE	High	Master Protein	A0A088ANI4	BRO1 domain-containing protein OS=Apis mellifera OX=7460 GN=ALiX PE=4 SV=1		0	FALSE	7.835	4	2	3	2	816	91.6	5.77				2.43							2.82													1							2
FALSE	High	Master Protein	A0A088AWA1	C2 domain-containing protein OS=Apis mellifera OX=7460 GN=LOC724498 PE=4 SV=1		0	FALSE	5.025	6	2	3	2	409	46	9.61				0																				2
FALSE	High	Master Protein	A0A088ACB6	C2 NT-type domain-containing protein OS=Apis mellifera OX=7460 PE=4 SV=1		0	FALSE	4.985	3	1	1	1	678	73.4	8.46			2.44																				1
FALSE	High	Master Protein	A0A087ZQ49	CAAX prenyl protease OS=Apis mellifera OX=7460 GN=LOC551466 PE=3 SV=1		0	FALSE	5.812	4	2	7	2	442	52.1	7.77								0					4.1					2.07										2					2
FALSE	High	Master Protein	A0A088AAI1	Calcium load-activated calcium channel OS=Apis mellifera OX=7460 GN=LOC552501 PE=3 SV=1		0	FALSE	8.124	8	1	4	1	183	21.1	9.6			6.94	0							2.16												1	1							1
FALSE	High	Master Protein	A0A088ACZ9	Calcium-transporting ATPase OS=Apis mellifera OX=7460 GN=LOC410371 PE=3 SV=1		0	FALSE	67.229	20	13	41	13	1002	110	5.64	4.59	0	44.01	14.68		1.62		3.89	1.76	0	4.64		4.01			3.2					2	1	12	6		1		1	1	1	1		1
FALSE	High	Master Protein	A0A087ZYD1	Calcium-transporting ATPase OS=Apis mellifera OX=7460 PE=3 SV=1		0	FALSE	34.879	10	9	19	9	1080	119.2	8.24	0		26.41	0	1.69	0					1.61										1		8	1	1	1					1
FALSE	High	Master Protein	A0A088AF78	Calponin OS=Apis mellifera OX=7460 GN=LOC408532 PE=3 SV=1		0	FALSE	9.704	15	2	5	2	169	19.1	8.4				2.65					4.07															2					2
FALSE	High	Master Protein	A0A087ZZA9	Calponin-homology (CH) domain-containing protein OS=Apis mellifera OX=7460 PE=4 SV=1		0	FALSE	12.589	20	3	28	2	158	18.2	9.99	2.04		17.28	5.73		4.89			9.74	5.85	2.33			2.53					1.68		1		3	3		2			3	3	2			2
FALSE	High	Master Protein	A0A087ZP00	Calreticulin OS=Apis mellifera OX=7460 GN=Crc PE=3 SV=1		0	FALSE	107.264	39	16	124	16	403	47.1	4.6	19.36	31.81	7.37	20.62	10.57	16.41	2.89	9.11	3.9	0	11.75		94.58	0	0			32.01			6	5	2	9	4	6	1	5	4	1	7		16	1
FALSE	High	Master Protein	Q76LA5	Carboxylic ester hydrolase OS=Apis mellifera OX=7460 GN=est PE=2 SV=1		0	FALSE	19.773	11	5	10	5	567	63.9	6.55		2.92				1.65					10.52			1.8								1				3					4			1
FALSE	High	Master Protein	A0A088A7H8	Carboxylic ester hydrolase OS=Apis mellifera OX=7460 GN=LOC409171 PE=3 SV=1		0	FALSE	24.511	22	8	20	8	538	61.2	6.71	0		0	4.1		0			0	1.8	9.51					2.19		1.84			1		1	3		1			2	2	6
FALSE	High	Master Protein	A0A088A9C3	Carboxylic ester hydrolase OS=Apis mellifera OX=7460 GN=LOC726134 PE=3 SV=1		0	FALSE	16.583	9	4	19	4	527	58.7	7.46	0		7.63	10.2		0		0	1.62	0	4.4			0							1		3	4		1		1	2	1	2			1
FALSE	High	Master Protein	A0A087ZN44	Carboxypeptidase OS=Apis mellifera OX=7460 PE=3 SV=1		0	FALSE	24.2	18	6	30	6	409	46.8	8.85		10.18		1.98	9.43		4.64	4.34		2.23	2.27	6.22	4.78	0			2.09	4.45				4		1	4		2	2		2	2	2	3	1
FALSE	High	Master Protein	A0A088A7X0	Carn_acyltransf domain-containing protein OS=Apis mellifera OX=7460 PE=3 SV=1		0	FALSE	66.689	34	17	48	17	662	76.8	8.72	6.72		37.29		0	1.61			1.78	0	13.33		2.59								9		14		1	1			3	2	7		1
FALSE	High	Master Protein	A0A088AP68	Carrier domain-containing protein OS=Apis mellifera OX=7460 GN=LOC412815 PE=4 SV=1		0	FALSE	8.343	2	3	4	3	2388	264.3	6.52									0		1.92																		2		1
FALSE	High	Master Protein	A0A088ACC2	Casein kinase II subunit beta OS=Apis mellifera OX=7460 GN=CkIIbeta PE=3 SV=1		0	FALSE	13.045	15	2	5	2	227	26.2	6.09			3.72	2.35						0													1	2						2
FALSE	High	Master Protein	A0A087ZRK9	Catalase OS=Apis mellifera OX=7460 PE=3 SV=1		0	FALSE	127.674	52	22	251	22	489	55.3	8.28	24.94	50.97	92.01	17.62	15.97	4.41	14.9	27.93	5.34	6.69	42.95	28.52	67.57	12.61			7.55	59.29	3.43		9	10	14	9	6	9	5	9	8	6	13	7	14	10
FALSE	High	Master Protein	G5D0N0	cGMP-dependent protein kinase foraging (Fragment) OS=Apis mellifera OX=7460 GN=For PE=4 SV=1		0.003	FALSE	2.556	9	1	1	1	128	14.8	8.87																0
FALSE	High	Master Protein	A0A088AVK1	cGMP-dependent protein kinase OS=Apis mellifera OX=7460 GN=100576901 PE=3 SV=1		0	FALSE	36.249	14	9	41	9	723	81.7	8.78	2.47		23.82	3.98		1.95			2	2.4	6.66			0	0	1.8	2.25	10.19	0		3		8	1		3			1	2	4			2
FALSE	High	Master Protein	A0A1J6XP18	Chaperone protein ClpB OS=Enterococcus faecalis OX=1351 GN=clpB PE=3 SV=1		0	FALSE	6.416	2	1	3	1	868	98	5.15			4.52																				1
FALSE	High	Master Protein	C5C822	Chaperone protein DnaK OS=Micrococcus luteus (strain ATCC 4698 / DSM 20030 / JCM 1464 / NBRC 3333 / NCIMB 9278 / NCTC 2665 / VKM Ac-2230) OX=465515 GN=dnaK PE=2 SV=1		0	FALSE	4.529	3	1	1	1	621	67.1	4.74								3																				1
FALSE	High	Master Protein	A0A221H3Y0	Chaperone protein DnaK OS=Serratia marcescens OX=615 GN=dnaK PE=2 SV=1		0	FALSE	9.487	4	2	2	2	637	69	4.97			6.05																				2
FALSE	High	Master Protein	A0A088AQQ4	Chitin-binding type-2 domain-containing protein OS=Apis mellifera OX=7460 GN=724199 PE=4 SV=1		0	FALSE	65.359	44	4	353	4	201	23	5.11	72.42	16.52	56.63	10.15	126.42	87.68	17.06	62.8	17.37	53.3	51.35	8.21	11.79	32.34	81.14	25.69	5.83	5.93	9.91	7.44	4	2	3	3	3	4	2	3	4	3	2	1	2	2
FALSE	High	Master Protein	A0A088APL1	Chitin-binding type-2 domain-containing protein OS=Apis mellifera OX=7460 GN=Cht5 PE=4 SV=1		0	FALSE	20.682	20	9	15	9	605	69	6.19		2.02			6.45		2.23	4.55					0		6.63							1			3		1	3					1
FALSE	High	Master Protein	A0A088A611	Chitin-binding type-2 domain-containing protein OS=Apis mellifera OX=7460 GN=LOC413705 PE=3 SV=1		0	FALSE	222.671	56	22	732	22	508	56.1	6.95	41.6	118.26	131.4	56.73	155.13	84.48	71.9	143.02	0	82.78	108.23	38.7	107.09	15.66	307.44	41.11	53.15	10.48	12.75	54.25	12	14	17	12	18	16	11	19	2	15	16	11	15	9
FALSE	High	Master Protein	A0A088AQI9	Chitin-binding type-2 domain-containing protein OS=Apis mellifera OX=7460 GN=LOC725725 PE=4 SV=1		0	FALSE	52.527	48	3	749	3	96	10.3	4.59	39.31	23.91	6.55	8.34	150.12	14.22	18.93	102.51	28.54	16.95	84.81	49.06	52.67	10.03	19.89	640.93	133	185.93	79.09	17.99	2	1	2	2	3	2	1	3	3	3	3	3	3	3
FALSE	High	Master Protein	A0A087ZS42	Chitin-binding type-2 domain-containing protein OS=Apis mellifera OX=7460 GN=LOC727129 PE=4 SV=1		0.006	FALSE	2.405	9	1	1	1	124	14.1	6						1.82																				1
FALSE	High	Master Protein	A0A088AB68	Chitin-binding type-4 domain-containing protein OS=Apis mellifera OX=7460 GN=LOC412969 PE=4 SV=1		0	FALSE	4.357	9	2	2	2	219	25.1	7.49																		1.71
FALSE	High	Master Protein	A0A087ZN59	CHK domain-containing protein OS=Apis mellifera OX=7460 GN=LOC408421 PE=4 SV=1		0	FALSE	52.15	31	13	102	13	401	46.5	7.75	2.63		46.63	27.11	2.32	14.88		4.66	23.08	30.02	17.74		2.47	8.94	2.27	8.9					2		10	7	1	7		3	7	7	4		1	3
FALSE	High	Master Protein	A0A087ZPX5	CHK domain-containing protein OS=Apis mellifera OX=7460 GN=LOC724536 PE=4 SV=1		0	FALSE	151.37	61	27	273	27	410	48	5.68	47.92		34.5	19.11	5.17	17.8		6.25	27.7	22.57	125.9		23.53	2.65	10.57	15.07	3.39	18.36	4.08		21		12	10	1	18		4	15	11	23		9	10
FALSE	High	Master Protein	A0A088AES4	CHK domain-containing protein OS=Apis mellifera OX=7460 GN=LOC726965 PE=4 SV=1		0	FALSE	7.376	6	3	11	3	455	52	5.53		1.91	0	1.6						0				1.82			4.08					2	1	1						1				2
FALSE	High	Master Protein	A0A088ARW7	CHK domain-containing protein OS=Apis mellifera OX=7460 PE=4 SV=1		0	FALSE	6.563	11	2	8	2	263	30.6	5.15			4.77	0		0				0	0			0									2	1		1				1	1			1
FALSE	High	Master Protein	P56682	Chymotrypsin inhibitor OS=Apis mellifera OX=7460 PE=1 SV=1		0	FALSE	20.517	96	4	121	4	56	6	4.73	0	37.1	0	0		0	6.36	0	2.4	0		16.39	0				110.91	4.9			1	4	1	1		1	2	2	2	1		3	1
FALSE	High	Master Protein	A0A088AKI2	Citrate synthase OS=Apis mellifera OX=7460 GN=LOC410059 PE=3 SV=1		0	FALSE	217.531	59	22	297	22	462	51.9	9	147.21		68.51	33.49		83.41		4.03	45	16.09	212.7		10.46	30.66		24.18			1.83		20		12	8		16		2	11	5	18		4	10
FALSE	High	Master Protein	A0A1Q5VZC9	Class II fructose-bisphosphate aldolase OS=Serratia marcescens OX=615 GN=A8A12_20100 PE=3 SV=1		0.009	FALSE	2.314	5	1	1	1	359	39	5.88				0																				1
FALSE	High	Master Protein	A0A088AFV6	Clathrin heavy chain OS=Apis mellifera OX=7460 GN=LOC550716 PE=3 SV=1		0	FALSE	42.415	9	12	36	12	1678	192	5.94	4.45		18.64	1.63		4.02		2.7	9.47	2.57	7.36			2.1							1		6	1		2		1	9	2	5			2
FALSE	High	Master Protein	A0A088A1Z4	CMP/dCMP-type deaminase domain-containing protein OS=Apis mellifera OX=7460 PE=4 SV=1		0.003	FALSE	2.664	8	1	1	1	130	14.4	8.68																		1.84
FALSE	High	Master Protein	A0A087ZNX2	CN hydrolase domain-containing protein OS=Apis mellifera OX=7460 GN=LOC409250 PE=4 SV=1		0	FALSE	64.726	43	12	121	12	383	43.4	5.92	3.12	32.28	16.7	21.44	3.21	28.01	11.12	5.51		8.74	9.22	22.59		8.66	5.93	2.38	119.58				3	6	5	6	1	10	4	3		4	2	8		5
FALSE	High	Master Protein	A0A088AAA2	CN hydrolase domain-containing protein OS=Apis mellifera OX=7460 GN=LOC413631 PE=4 SV=1		0	FALSE	10.053	8	3	5	3	516	59.1	8.54																	11.93	1.9
FALSE	High	Master Protein	A0A088ALI4	Coatomer subunit alpha OS=Apis mellifera OX=7460 GN=alphaCop PE=4 SV=1		0	FALSE	35.302	8	7	18	7	1214	137.9	7.36			2.46	16.52				5.21	0	0	1.89			0									1	6				2	1	1	1			1
FALSE	High	Master Protein	A0A088A977	Coatomer subunit beta OS=Apis mellifera OX=7460 GN=betaCop PE=4 SV=1		0	FALSE	8.381	3	2	3	2	949	104.7	6.07			4.36						1.68														2						1
FALSE	High	Master Protein	A0A087ZY82	Coatomer subunit beta' OS=Apis mellifera OX=7460 PE=3 SV=1		0.001	FALSE	3.921	1	1	1	1	899	101.3	5.96																		2.44
FALSE	High	Master Protein	A0A088AII7	Coatomer subunit gamma OS=Apis mellifera OX=7460 GN=gammaCop PE=3 SV=1		0	FALSE	7.74	5	3	5	3	876	96.4	5.58			0			0			0														1			1			2
FALSE	High	Master Protein	A0A086FC80	Cold-shock protein OS=Serratia marcescens OX=615 GN=A8A12_02415 PE=4 SV=1		0.004	FALSE	2.484	17	1	3	1	69	7.4	7.24			1.86	0		0																	1	1		1
FALSE	High	Master Protein	A0A2G5RW84	Colicin V synthesis protein OS=Serratia marcescens OX=615 GN=CS366_18485 PE=4 SV=1		0.001	FALSE	3.611	1	1	10	1	699	77.1	8.22				2.01		0				3.92			1.47				5.52	3.79						1		1				1			1
FALSE	High	Master Protein	A0A088A3U7	Collagen IV NC1 domain-containing protein OS=Apis mellifera OX=7460 GN=LOC408551 PE=4 SV=1		0	FALSE	142.624	12	16	513	16	1833	183.2	6.98		43.57	140.05	130.6	160.11		38.82	81.85	47.64	176.32		17.77	99.29	2.25	163.47		20.74	10.74	5.59	42.74		7	11	10	10		4	9	8	14		3	7	2
FALSE	High	Master Protein	A0A088A3X0	Collagen IV NC1 domain-containing protein OS=Apis mellifera OX=7460 GN=LOC408552 PE=4 SV=1		0	FALSE	193.753	8	11	551	11	1929	190.9	7.09		42.33	247.35	223.93	200.8	2.01	36.45	132.24	85.51	229.11		23.99	104.27	2.08	153.36		16.85	24.03	7.79	52.94		2	9	10	9	1	2	8	9	9		2	5	2
FALSE	High	Master Protein	A0A088A6D6	Complex1_30kDa domain-containing protein OS=Apis mellifera OX=7460 GN=Ndufs3 PE=3 SV=1		0	FALSE	95.325	55	12	71	12	261	30.5	6.06	5.9		94.72	10.53		7.4		1.87	23.24	5.67	14.85		0		0						3		11	2		4		1	7	2	5		1
FALSE	High	Master Protein	A0A087ZNK1	Complex1_49kDa domain-containing protein OS=Apis mellifera OX=7460 GN=Ndufs2 PE=3 SV=1		0	FALSE	112.233	48	17	101	17	480	55.4	6.76	9.48		89.67	12.61		6.29		0	36.42	1.94	23.13		11.05	7.12	5.67				0		4		15	7		4		1	12	1	7		4	2
FALSE	High	Master Protein	A0A088ADK7	Coronin OS=Apis mellifera OX=7460 GN=LOC409316 PE=3 SV=1		0.007	FALSE	2.343	2	1	1	1	540	61.1	8.92									0																				1
FALSE	High	Master Protein	A0A087ZSK9	Coronin OS=Apis mellifera OX=7460 GN=LOC412080 PE=3 SV=1		0.001	FALSE	3.08	3	1	1	1	494	54.8	6.54									0																				1
FALSE	High	Master Protein	A0A088A2Z3	COX assembly mitochondrial protein OS=Apis mellifera OX=7460 GN=Ndufs5 PE=3 SV=1		0	FALSE	19.287	36	3	15	3	106	12.6	6.16			17.72	5.75					6.67	3.34	2.31												2	1					3	1	1
FALSE	High	Master Protein	A0A088AI62	COX6C domain-containing protein OS=Apis mellifera OX=7460 GN=Cox6c PE=4 SV=1		0	FALSE	16.169	55	5	42	5	75	8.8	9.16	3.62		11.76	4.51		6.9		0	5.46	3.73	5.65				0						3		4	4		4		1	3	2	2
FALSE	High	Master Protein	A0A088A1C5	CRAL-TRIO domain-containing protein OS=Apis mellifera OX=7460 GN=408361 PE=4 SV=1		0	FALSE	5.158	4	1	2	1	306	35.6	8.51									0	2.76																			1	1
FALSE	High	Master Protein	A0A088A1P2	CRAL-TRIO domain-containing protein OS=Apis mellifera OX=7460 GN=LOC552447 PE=4 SV=1		0	FALSE	6.365	4	1	12	1	288	34.1	8.62	2.45			2.44	2.68	4.4			4.86	2.38	3.24			2.25	1.77						1			1	1	1			1	1	1			1
FALSE	High	Master Protein	A0A088AC27	CRAL-TRIO domain-containing protein OS=Apis mellifera OX=7460 PE=4 SV=1		0	FALSE	4.306	4	1	2	1	279	32.4	6.9	2.23								1.84												1								1
FALSE	High	Master Protein	A0A088AKE3	C-type lectin domain-containing protein OS=Apis mellifera OX=7460 GN=100578121 PE=4 SV=1		0.001	FALSE	3.787	4	1	3	1	315	37.2	9.91				0					0															1					1
FALSE	High	Master Protein	A0A087ZXS4	C-type lectin domain-containing protein OS=Apis mellifera OX=7460 GN=CTL11 PE=4 SV=1		0	FALSE	46.764	42	8	60	7	219	25.3	7.36	2.3		11.19	0	6.75	7.66		2.54		4.52	1.7	2.7	0	14.91	18.41		2.79		0		3		3	1	4	6		2		3	1	1	1	6
FALSE	High	Master Protein	A0A087ZNY6	C-type lectin domain-containing protein OS=Apis mellifera OX=7460 GN=CTL5 PE=4 SV=1		0	FALSE	109.456	59	10	272	9	217	25	8.32	45.97	26.51	50.28	22.21	48.3	50.45	8.61	27.66		22.53	31.15	39.61	13.84	46.24	75.37	1.6	5.7	3.26	23.47	2.27	8	6	7	8	8	8	2	6		7	8	6	4	8
FALSE	High	Master Protein	A0A088AM42	C-type lectin domain-containing protein OS=Apis mellifera OX=7460 PE=4 SV=1		0	FALSE	29.753	44	7	46	7	231	26.8	7.36	0	5.89	6.35		2.96	0	0	4.53		6.8	1.7	9.95	0	5.39	11.54				1.65		1	3	3		2	3	1	2		4	2	4	2	4
FALSE	High	Master Protein	A0A088AHY5	CUB domain-containing protein OS=Apis mellifera OX=7460 GN=LOC551372 PE=4 SV=1		0.001	FALSE	3.481	2	1	11	1	372	41.4	5.68		1.62	1.74					0				0			0							1	1					1				1
FALSE	High	Master Protein	A0A088A6G8	CYCLIN domain-containing protein OS=Apis mellifera OX=7460 GN=LOC412342 PE=3 SV=1		0	FALSE	6.185	11	2	2	2	271	31.2	5.99									0																				2
FALSE	High	Master Protein	Q0GQQ4	Cys-loop ligand-gated ion channel subunit (Fragment) OS=Apis mellifera OX=7460 PE=2 SV=1		0	FALSE	14.988	6	2	4	2	469	54.2	8.69			11.06																				2
FALSE	High	Master Protein	A0A347ZMU3	Cytochrome b OS=Apis mellifera OX=7460 GN=Cytb PE=3 SV=1		0	FALSE	18.732	13	5	48	5	383	45.2	9.29	6.78	1.78	18.82	3.59	0	0		1.68	8.28	1.76	6.61	0	6.26	0	2.02					0	4	1	4	2	1	2		2	2	1	3	1	2	1
FALSE	High	Master Protein	A0A088A5G3	Cytochrome b5 heme-binding domain-containing protein OS=Apis mellifera OX=7460 GN=LOC413486 PE=3 SV=1		0	FALSE	9.599	45	3	12	3	138	15.8	4.7	2.75		3.36		2.76			2.34			2.28		4.47					5.72			1		1		1			1			1		2
FALSE	High	Master Protein	A0A087ZUT8	Cytochrome b5 heme-binding domain-containing protein OS=Apis mellifera OX=7460 GN=LOC726860 PE=3 SV=1		0	FALSE	14.633	49	3	48	3	130	14.5	5.29		6.56	0	3.34	1.67		6.85	0	0		0	9.32	12.47			0	8.34	20.84	1.92			3	1	1	1		2	3	2		1	3	3
FALSE	High	Master Protein	A0A088AJP5	Cytochrome b5 heme-binding domain-containing protein OS=Apis mellifera OX=7460 PE=4 SV=1		0	FALSE	7.453	6	3	3	3	427	50.1	7.74											0																				3
FALSE	High	Master Protein	A0A088AFT4	Cytochrome b-c1 complex subunit 6 OS=Apis mellifera OX=7460 GN=LOC726316 PE=3 SV=1		0	FALSE	29.073	44	3	102	3	87	10.2	6.99			16.36		0	0		19	0	2.11	25.46		47.23		0	2.9		3.29	0				2		1	1		3	2	2	2		3
FALSE	High	Master Protein	A0A088ASD9	Cytochrome b-c1 complex subunit 7 OS=Apis mellifera OX=7460 GN=LOC551757 PE=3 SV=1		0	FALSE	67.318	62	9	122	9	110	13.5	5.92	17.75		48.8	15.28	6.79	8.02		15.45	46.96	24.88	12.57		25	2.14	4.43			4.49			4		7	4	3	4		6	9	7	4		6	2
FALSE	High	Master Protein	A0A088AI48	Cytochrome b-c1 complex subunit Rieske, mitochondrial OS=Apis mellifera OX=7460 PE=4 SV=1		0	FALSE	46.982	39	9	74	9	246	26.7	9.13	5.86	0	48.86	12.92		2.04		1.82	31.26	8.14	13.52		3.42	2.74		0		5.7	0		3	1	6	5		2		1	7	4	4		2	3
FALSE	High	Master Protein	A0A087ZSK5	Cytochrome c heme lyase OS=Apis mellifera OX=7460 GN=LOC408968 PE=3 SV=1		0.001	FALSE	3.57	4	1	2	1	276	32.2	6.25			4.02																				1
FALSE	High	Master Protein	P00038	Cytochrome c OS=Apis mellifera OX=7460 GN=cytC PE=1 SV=2		0	FALSE	22.58	39	5	45	5	108	11.9	9.47	9.65	0	2.32	3.65		4.32			4.21	3.78	8.47		19.23					9.91			4	2	1	3		1			2	2	3		5
FALSE	High	Master Protein	A0A0B5HAU2	Cytochrome c oxidase subunit 1 OS=Apis mellifera syriaca OX=279977 GN=COX1 PE=3 SV=1		0	FALSE	11.948	7	2	15	2	520	59.1	8.15	0		2.73			0			0		5.39		2.47								1		2			1			1		2		1
FALSE	High	Master Protein	P20375	Cytochrome c oxidase subunit 2 OS=Apis mellifera ligustica OX=7469 GN=COII PE=3 SV=1		0	FALSE	37.761	24	4	54	3	225	26.6	6.37	17		34.35	8.76		13.69		5.65	14.71	2.8	18.21		3.1	5.18				2.31	1.79	0	2		4	2		3		2	4	1	3		1	2
FALSE	High	Master Protein	A0A087ZUZ0	Cytochrome c oxidase subunit OS=Apis mellifera OX=7460 GN=Cox6b1 PE=3 SV=1		0	FALSE	38.387	40	4	76	4	92	10.9	7.78	5.41		45.22	15.95	0	5.18		5.03	28.44	16.19	16.59		19.25	0	4.62						2		4	4	1	2		3	4	3	3		3	1
FALSE	High	Master Protein	H9D2W0	Cytochrome oxidase subunit II (Fragment) OS=Apis mellifera OX=7460 PE=4 SV=1		0	FALSE	4.779	22	2	4	1	95	11.4	5.08			2.26						0		1.75												1						1		2
FALSE	High	Master Protein	Q309A5	Cytochrome P450 monooxygenase OS=Apis mellifera OX=7460 GN=CYP6AS5 PE=2 SV=1		0	FALSE	26.109	14	6	13	1	499	57.9	8.38			19.69	3.34				2.15			4.06												6	1				1			1
FALSE	High	Master Protein	A0A088AEK4	Cytochrome P450 monooxygenase OS=Apis mellifera OX=7460 PE=4 SV=1		0	FALSE	22.084	13	5	12	1	491	57.1	8.56			18.89	3.34				2.15			4.06												5	1				1			1
FALSE	High	Master Protein	A0A088ADG9	CYTOSOL_AP domain-containing protein OS=Apis mellifera OX=7460 PE=4 SV=1		0	FALSE	150.016	54	20	267	20	457	49.3	6.98	60.4	80.77	14.46	5.11	26.63	13.42	27.53	5.97	4.13		59.06	34.99	51.25	7.17		0	76.07	197.16	0		13	10	3	4	9	7	6	3	3		14	10	11	7
FALSE	High	Master Protein	A0A087ZYZ6	DAO domain-containing protein OS=Apis mellifera OX=7460 GN=LOC410999 PE=4 SV=1		0	FALSE	26.052	13	5	19	5	454	50.7	9.14	2.16		17.61			0			4.44		8.2		0								1		5			1			2		5		1
FALSE	High	Master Protein	A0A087ZUJ8	DAO domain-containing protein OS=Apis mellifera OX=7460 PE=4 SV=1		0	FALSE	8.606	9	2	2	2	420	46.9	6.14			2.84								0												1								1
FALSE	High	Master Protein	A0A088A822	Delta-1-pyrroline-5-carboxylate synthase OS=Apis mellifera OX=7460 GN=LOC412948 PE=3 SV=1		0	FALSE	247.384	52	32	231	32	784	85	7.81	8.73		287.61	9.3		30.14		3.32	2.67	13.89	118.64		2.2	15.81		8.42					7		32	4		19		3	4	7	22		2	12
FALSE	High	Master Protein	A0A088ACF3	Delta-aminolevulinic acid dehydratase OS=Apis mellifera OX=7460 GN=Pbgs PE=3 SV=1		0	FALSE	13.125	14	3	7	3	336	37	8.53	2.1		6.07							0	2.68			1.99							1		2							1	2			1
FALSE	High	Master Protein	A0A088AQM2	Deltameth_res domain-containing protein OS=Apis mellifera OX=7460 GN=LOC551381 PE=4 SV=1		0	FALSE	40.899	38	2	102	2	94	10.5	9.76	34		37.51	14.13	6.02	21.86		15.11	28.01	14.41	45.09		20.17	4.39	3.95						2		2	2	1	2		2	2	2	2		2	2
FALSE	High	Master Protein	A0A088APL2	Dihydrolipoamide acetyltransferase component of pyruvate dehydrogenase complex OS=Apis mellifera OX=7460 GN=LOC551631 PE=3 SV=1		0	FALSE	99.752	36	17	91	17	622	66.9	6.74	42.76	15.93	47.08	5.41		4.26	1.94		9.57	6.75	4.78	1.76	13.29	0			13.18	27.96			11	5	10	3		3	2		8	3	4	2	4	1
FALSE	High	Master Protein	A0A088AII9	Dihydrolipoyl dehydrogenase OS=Apis mellifera OX=7460 GN=LOC551039 PE=3 SV=1		0	FALSE	98.679	38	15	72	15	507	54.5	7.64	54.9		26.03	6.29		7.32			11.76	5.91	6.12		2.67	7.17			11.82	2.12			14		6	2		2			5	3	2		2	3
FALSE	High	Master Protein	A0A088AF14	Dihydroorotate dehydrogenase (quinone), mitochondrial OS=Apis mellifera OX=7460 GN=100577081 PE=3 SV=1		0	FALSE	17.359	17	4	6	4	392	43.4	9.22			9.6								0												4								1
FALSE	High	Master Protein	A0A2H4MD19	Dihydropteridine reductase (Fragment) OS=Apis mellifera OX=7460 GN=DHPR PE=2 SV=1		0	FALSE	7.21	12	2	5	2	230	24.9	8.76				2.69									2.14					6.62						1									1
FALSE	High	Master Protein	A0A088AHJ1	Dihydropyrimidine dehydrogenase [NADP(+)] OS=Apis mellifera OX=7460 GN=LOC410207 PE=3 SV=1		0.001	FALSE	3.017	1	1	1	1	1024	112	7.58									0																				1
FALSE	High	Master Protein	A0A087ZQA2	Dipeptidase OS=Apis mellifera OX=7460 PE=3 SV=1		0	FALSE	73.78	32	11	37	11	418	47	7.24		3.31	65.13	2.07		2.31	0	9		2.05	13.58			2.2	0							1	10	2		2	1	4		1	4			3
FALSE	High	Master Protein	A0A088ARC7	DJ-1_PfpI domain-containing protein OS=Apis mellifera OX=7460 PE=4 SV=1		0	FALSE	22.546	46	6	34	6	186	20.2	6.57		13.29					2.76					6.37	5.11				7.77	29.79	3.61			4					1					2	2
FALSE	High	Master Protein	A0A093VDC3	DNA protection during starvation protein OS=Pectobacterium carotovorum subsp. carotovorum OX=555 GN=dps PE=3 SV=1		0	FALSE	4.436	9	1	19	1	167	18.5	6.09		12.87			2.06		2.22	10.46				2.32					2					1			1		1	1				1
FALSE	High	Master Protein	A0A087EQX4	DNA-binding protein OS=Lactobacillus kunkeei OX=148814 GN=FF306_00035 PE=3 SV=1		0	FALSE	26.481	62	5	17	5	91	9.5	9.99		38.52					11.98					1.66										5					2					1
FALSE	High	Master Protein	A0A084WVH6	DNA-directed RNA polymerase subunit alpha OS=Serratia marcescens OX=615 GN=rpoA PE=3 SV=1		0	FALSE	8.494	8	2	2	2	329	36.4	5.06			4.41																				2
FALSE	High	Master Protein	A0A1Q4NUD5	DNA-directed RNA polymerase subunit beta' OS=Serratia marcescens OX=615 GN=rpoC PE=3 SV=1		0	FALSE	3.634	1	1	1	1	1407	154.8	6.52			2.68																				1
FALSE	High	Master Protein	A0A087ZYS0	Dolichol-phosphate mannosyltransferase subunit 1 OS=Apis mellifera OX=7460 GN=LOC409115 PE=3 SV=1		0	FALSE	5.611	9	1	1	1	253	29	8.4			3.62																				1
FALSE	High	Master Protein	A0A087ZSQ6	Dolichyl-diphosphooligosaccharide--protein glycosyltransferase 48 kDa subunit OS=Apis mellifera OX=7460 GN=LOC552051 PE=3 SV=1		0	FALSE	11.733	14	4	4	4	434	48.4	5.55	0		2.64	0		0															1		1	1		1
FALSE	High	Master Protein	A0A087ZUX6	Dolichyl-diphosphooligosaccharide--protein glycosyltransferase subunit 1 OS=Apis mellifera OX=7460 PE=3 SV=1		0	FALSE	44.833	27	12	70	12	566	65.5	7.34	11.85	0	22.93	10.86		10.77		6.25	7.51	1.66	23.92		8.28	0				2.28			6	1	7	8		9		3	5	1	7		4	3
FALSE	High	Master Protein	A0A088A702	Dolichyl-diphosphooligosaccharide--protein glycosyltransferase subunit 2 OS=Apis mellifera OX=7460 PE=3 SV=1		0	FALSE	5.204	5	2	2	2	651	73.3	8.92	0					0															1					1
FALSE	High	Master Protein	A0A088AW39	Dolichyl-diphosphooligosaccharide--protein glycosyltransferase subunit DAD1 OS=Apis mellifera OX=7460 GN=LOC727568 PE=3 SV=1		0	FALSE	4.439	15	2	3	2	111	12.6	8.62	0		2.03																		1		2
FALSE	High	Master Protein	A0A087ZR80	Dopey_N domain-containing protein OS=Apis mellifera OX=7460 GN=LOC412544 PE=4 SV=1		0	FALSE	4.231	1	1	1	1	2481	278	6.65			2.71																				1
FALSE	High	Master Protein	A0A087ZUP5	DPPIV_N domain-containing protein OS=Apis mellifera OX=7460 PE=4 SV=1		0	FALSE	12.22	9	1	4	1	231	25.8	6.18			10.02																				1
FALSE	High	Master Protein	A0A088A6Q4	DUF1279 domain-containing protein OS=Apis mellifera OX=7460 GN=LOC725167 PE=4 SV=1		0	FALSE	8.281	7	2	16	2	353	39.7	9.58	2.71		12.64	1.7		0			2.32	0	4.3				0						1		2	1		1			1	1	1
FALSE	High	Master Protein	A0A088A055	DUF1907 domain-containing protein OS=Apis mellifera OX=7460 GN=LOC411385 PE=4 SV=1		0	FALSE	20.006	20	4	24	4	319	35.4	6.57	0		2.84	14.07	0	0			0				3.38	0				3.27			2		1	4	1	2			4				1	1
FALSE	High	Master Protein	A0A088ANF4	DUF3421 domain-containing protein OS=Apis mellifera OX=7460 PE=4 SV=1		0	FALSE	30.68	27	3	124	3	132	14.4	5.81	4.49	10.08	50.21	22.31	22.39	6.72	5.18	18.45	15.82	16.03	9.21		24.65	2.1	8.11	4.68		47.45	4.73	7.14	2	2	3	2	3	2	1	2	2	2	2		3	2
FALSE	High	Master Protein	A0A088AA70	DUF3421 domain-containing protein OS=Apis mellifera OX=7460 PE=4 SV=1		0	FALSE	109.017	83	8	768	8	125	13.9	8.18	66.55	12.03	154.8	72.58	126.75	87.68	4.27	95.92	64.79	77.08	69.8	9.38	46.25	57.08	60.77	173.13	2.19	327.17	85.49	17.62	5	2	8	5	7	7	2	6	6	5	5	2	6	6
FALSE	High	Master Protein	A0A087ZNT9	DUF4536 domain-containing protein OS=Apis mellifera OX=7460 GN=107964876 PE=4 SV=1		0	FALSE	4.187	31	2	8	2	80	8.9	10.1	1.82		2.01		3.82						3.73										1		1		1						2
FALSE	High	Master Protein	A0A088AEB0	DUF4773 domain-containing protein OS=Apis mellifera OX=7460 PE=4 SV=1		0	FALSE	4.051	11	2	2	2	237	27.6	6.07								2.06																				2
FALSE	High	Master Protein	A0A087ZVH4	DUF89 domain-containing protein OS=Apis mellifera OX=7460 GN=PANK4 PE=4 SV=1		0	FALSE	7.851	2	1	3	1	784	88.5	7.02			7.61	0																			1	1
FALSE	High	Master Protein	A0A088AA23	dUTPase domain-containing protein OS=Apis mellifera OX=7460 PE=4 SV=1		0.002	FALSE	2.859	10	1	1	1	143	15.7	6.79	1.8																				1
FALSE	High	Master Protein	A0A088AMM2	Dynamin-type G domain-containing protein OS=Apis mellifera OX=7460 GN=opa1-like PE=3 SV=1		0	FALSE	13.324	5	5	5	5	976	113.6	8.47											10.46																				5
FALSE	High	Master Protein	A0A087ZRS3	Dynamin-type G domain-containing protein OS=Apis mellifera OX=7460 PE=3 SV=1		0	FALSE	4.781	1	1	7	1	868	97.9	4.44	3.46		5.07	0		0			0												1		1	1		1			1
FALSE	High	Master Protein	A0A087ZYC6	Dynein light chain OS=Apis mellifera OX=7460 GN=DLC-D PE=3 SV=1		0	FALSE	20.441	46	4	36	4	89	10.4	7.37	0			3.78				6.74	0	2.48	8.53	4.49	15.11	0	0		5.98	25.6			2			3				2	1	1	2	2	3	1
FALSE	High	Master Protein	A0A088A2N6	E3 ubiquitin-protein ligase OS=Apis mellifera OX=7460 GN=Nedd4 PE=4 SV=1		0	FALSE	11.827	5	3	4	3	840	96.5	5.41			2.13					1.86										2.9	1.63				1					1
FALSE	High	Master Protein	A0A088AAX0	EF-hand domain-containing protein OS=Apis mellifera OX=7460 GN=Manf PE=4 SV=1		0.001	FALSE	3.389	6	1	2	1	175	20.1	7.52						0												1.92								1
FALSE	High	Master Protein	A0A0B4J2M5	Electron transfer flavoprotein-ubiquinone oxidoreductase OS=Apis mellifera OX=7460 GN=Etfdh PE=4 SV=1		0	FALSE	17.796	10	5	8	5	606	67	7.53	0		10.29						1.89												1		5						1
FALSE	High	Master Protein	A0A087ZS68	ELFV_dehydrog domain-containing protein OS=Apis mellifera OX=7460 GN=Gdh PE=3 SV=1		0	FALSE	206.411	56	30	360	30	553	61.6	8.09	115.38	53.01	109.33	20.51	31.98	46.23		16.64	44.03	54.56	103.02	0	58.61	7.97	4.2	6.18		17.8	1.81		25	11	22	8	11	21		8	21	18	24	1	17	4
FALSE	High	Master Protein	A0A087ZRE3	Elongation factor 1-alpha OS=Apis mellifera OX=7460 GN=EF1a-F2 PE=3 SV=1		0	FALSE	73.801	41	13	148	13	461	50.3	9.03	5.17	1.75	55.65	62.25		22.72		2.07	40.17	30.49	41.29		6.13	7.65	1.74	5.04	2.33	10	0		5	1	9	11		8		1	10	10	11		4	4
FALSE	High	Master Protein	A0A087ZTR9	Elongation factor G, mitochondrial OS=Apis mellifera OX=7460 GN=LOC411351 PE=3 SV=1		0	FALSE	11.47	6	4	7	4	744	84.5	7.11	3.3										9.12										3										3
FALSE	High	Master Protein	A0A088A1L8	Elongation factor Ts, mitochondrial OS=Apis mellifera OX=7460 GN=LOC408352 PE=3 SV=1		0	FALSE	40.284	37	8	39	8	302	34	6.71	11.49		20.24	0		2.46			2.19	3.01	41.1			0							4		4	1		1			2	1	8			2
FALSE	High	Master Protein	D1MWN8	Elongation factor Tu (Fragment) OS=Pectobacterium carotovorum subsp. carotovorum OX=555 GN=tuf PE=4 SV=1		0	FALSE	42.928	40	8	24	2	257	28.7	4.89			27.25	10.82		4.72		2.2		0									1.84				6	5		3		1		1
FALSE	High	Master Protein	A0A087ZW54	Elongation factor Tu OS=Apis mellifera OX=7460 GN=LOC408328 PE=3 SV=1		0	FALSE	320.646	74	31	564	29	469	52.4	7.96	200.78		363.62	20.34	4.32	65.39	1.98	17.31	69.82	41.94	307.67		69.26	47.08		5.61	1.75		6.18		24		30	9	1	19	1	8	22	15	30		15	18
FALSE	High	Master Protein	A0A1B4XKS5	Elongation factor Tu OS=Enterococcus faecalis OX=1351 GN=tuf PE=3 SV=1		0	FALSE	24.938	17	4	20	3	395	43.4	4.83			10				24.28	13.98			0				0				1.69				1				2	3			1
FALSE	High	Master Protein	A0A087EP72	Elongation factor Tu OS=Lactobacillus kunkeei OX=148814 GN=tuf PE=3 SV=1		0	FALSE	40.695	40	11	43	9	395	43.4	4.94	6.29	26.87	10.59			3.78	13.32	4.03	2.32	1.47	8.92			4.16		4			5.76		1	8	2			1	5	1	1	1	1			1
FALSE	High	Master Protein	V5T6M5	Elongation factor Tu OS=Lactobacillus mellis OX=1218508 GN=tuf PE=3 SV=1		0	FALSE	15.895	12	4	32	2	417	46.2	4.97	6.29		10.98			3.78	1.98	6.85	4.38	5.19	8.92			4.16		4			4.09		1		2			1	1	3	2	2	1			1
FALSE	High	Master Protein	A0A0J5CD52	Elongation factor Tu OS=Serratia marcescens OX=615 GN=tuf PE=3 SV=1		0	FALSE	54.177	31	10	43	3	394	43.2	5.31			35.91	10.82		10.63	21.5	11.06		0	2.12				0				1.84				7	6		4	1	3		1	2
FALSE	High	Master Protein	V5RJB0	Elongation factor Tu OS=Spiroplasma apis B31 OX=1276258 GN=tufA PE=3 SV=1		0	FALSE	22.479	9	3	42	1	395	43	5.31	6.29		26.23			3.78	23.48	10.35	2.32	1.47	8.92			4.16	0	4			4.09		1		3			1	2	2	1	1	2			1
FALSE	High	Master Protein	A0A088AUR5	Elp3 domain-containing protein OS=Apis mellifera OX=7460 PE=3 SV=1		0	FALSE	7.024	5	3	6	3	566	64.2	9.58		0									1.65		4.56				0	1.65				1									1		2
FALSE	High	Master Protein	A0A088AG65	EMC1_C domain-containing protein OS=Apis mellifera OX=7460 PE=4 SV=1		0	FALSE	33.335	12	8	16	8	947	106.2	8.44		0	10.56	0		0							15.79									1	5	1		1							5
FALSE	High	Master Protein	A0A088ADS9	Endo/exonuclease/phosphatase domain-containing protein OS=Apis mellifera OX=7460 GN=LOC412416 PE=4 SV=1		0	FALSE	7.56	6	2	3	2	558	65.2	7.39			3.22								2.24												2								1
FALSE	High	Master Protein	A0A087ZUY8	Endo/exonuclease/phosphatase domain-containing protein OS=Apis mellifera OX=7460 PE=4 SV=1		0.009	FALSE	2.317	2	1	2	1	464	53.5	7.08			0								0												1								1
FALSE	High	Master Protein	A0A088AST9	Enolase OS=Apis mellifera OX=7460 PE=4 SV=1		0	FALSE	25.824	32	8	18	8	366	39.8	7.05			0	6.26		0			2.03	0	1.64			0									1	7		1			2	1	1			2
FALSE	High	Master Protein	A0A1B4XPT3	Enolase OS=Enterococcus faecalis OX=1351 GN=eno PE=3 SV=1		0	FALSE	3.739	3	1	2	1	432	46.5	4.68								4.56																				1
FALSE	High	Master Protein	A0A087ENY7	Enolase OS=Lactobacillus kunkeei OX=148814 GN=eno PE=3 SV=1		0	FALSE	19.164	18	5	6	5	439	47.7	4.84		9.28					8.84															3					2
FALSE	High	Master Protein	A0A086FND6	Enolase OS=Serratia marcescens OX=615 GN=eno PE=3 SV=1		0	FALSE	10.051	7	2	3	2	431	45.4	5.38			4.96			0																	2			1
FALSE	High	Master Protein	A0A088AQL3	ENTH domain-containing protein OS=Apis mellifera OX=7460 GN=lqfR PE=4 SV=1		0.001	FALSE	3.243	1	1	3	1	1443	165.4	5.53				0					1.8		2.06													1					1		1
FALSE	High	Master Protein	A0A088ATX9	ENTH domain-containing protein OS=Apis mellifera OX=7460 PE=4 SV=1		0	FALSE	4.426	2	1	7	1	569	62.4	5.52			0	0					0	0					0								1	1					1	1
FALSE	High	Master Protein	A0A088ANF9	Epimerase domain-containing protein OS=Apis mellifera OX=7460 GN=LOC412149 PE=4 SV=1		0	FALSE	9.142	8	2	6	2	372	41.6	6.15			3.13			0			0	0	3.01												1			1			2	1	1
FALSE	High	Master Protein	A0A087ZQU6	Epimerase domain-containing protein OS=Apis mellifera OX=7460 PE=4 SV=1		0	FALSE	70.971	39	12	94	12	398	45.9	8.85	4.34		53.71	2.32	2.78	4.54		6.63	19.32	2.22	34.52		2.23	2.26	2.46						5		10	5	1	4		2	8	3	6		2	1
FALSE	High	Master Protein	A0A087ZVE8	Epoxide hydrolase OS=Apis mellifera OX=7460 GN=LOC406152 PE=3 SV=1		0	FALSE	60.844	35	11	160	11	456	52	8.35	26.28	11.79	35.55	23.06	22.07	25.56		38.35	6.64	2.77	41.21	4.68	22.42	11.11	12.78	3.85		23.97	6.96	0	7	2	7	6	4	7		6	4	2	7	2	6	5
FALSE	High	Master Protein	A0A088ADE0	Erf4 domain-containing protein OS=Apis mellifera OX=7460 GN=LOC726330 PE=4 SV=1		0.001	FALSE	3.833	8	1	1	1	154	17.3	6.52			1.84																				1
FALSE	High	Master Protein	A0A088A7F1	ETF domain-containing protein OS=Apis mellifera OX=7460 GN=LOC410308 PE=4 SV=1		0	FALSE	83.185	59	13	53	13	253	27.6	6.93	41.41		4.84			5.72			0		60.06			2.11		5.94					8		1			5			2		10			1
FALSE	High	Master Protein	A0A088A872	ETF domain-containing protein OS=Apis mellifera OX=7460 GN=LOC551710 PE=4 SV=1		0	FALSE	81.445	55	15	58	15	333	35.4	8.32	36.16		5.6	4.31		9.78			2.61	0	58.51		2.07	0		0					8		2	1		6			3	1	15		1	1
FALSE	High	Master Protein	A0A088A560	Eukaryotic translation initiation factor 3 subunit A OS=Apis mellifera OX=7460 GN=eIF3-S10 PE=3 SV=1		0	FALSE	12.992	4	4	8	4	1098	129.8	8.84			1.62			2.09			4.44														1			2			4
FALSE	High	Master Protein	A0A088AC80	Eukaryotic translation initiation factor 3 subunit B OS=Apis mellifera OX=7460 GN=eIF3-S9 PE=3 SV=1		0	FALSE	15.288	7	4	10	4	702	81.5	5.55		6.2										0	1.7					5.71				3										2	1
FALSE	High	Master Protein	A0A087ZST3	Eukaryotic translation initiation factor 3 subunit C OS=Apis mellifera OX=7460 GN=eIF3-S8 PE=3 SV=1		0.001	FALSE	3.16	2	1	2	1	892	104.3	5.83				0																				1
FALSE	High	Master Protein	A0A088AQJ3	Eukaryotic translation initiation factor 3 subunit E OS=Apis mellifera OX=7460 GN=LOC551242 PE=3 SV=1		0	FALSE	7.693	5	2	2	2	440	51.6	6.07						2.32					0															1					1
FALSE	High	Master Protein	A0A088A861	Eukaryotic translation initiation factor 3 subunit J OS=Apis mellifera OX=7460 GN=Adam PE=3 SV=1		0	FALSE	4.162	4	1	4	1	236	27.4	4.96				1.69					0	0														1					1	1
FALSE	High	Master Protein	A0A088ATI4	Eukaryotic translation initiation factor 3 subunit K OS=Apis mellifera OX=7460 GN=LOC551960 PE=3 SV=1		0.002	FALSE	2.943	4	1	5	1	216	24.8	5.82						0			0		2.11		1.68					1.93								1			1		1		1
FALSE	High	Master Protein	A0A088ALS2	Eukaryotic translation initiation factor 5A OS=Apis mellifera OX=7460 GN=LOC552572 PE=3 SV=1		0	FALSE	5.221	13	2	4	2	160	17.6	5.4			3.35	1.85							6.37												1	1							1
FALSE	High	Master Protein	A0A088ATD5	Exonuclease domain-containing protein OS=Apis mellifera OX=7460 GN=725736 PE=4 SV=1		0	FALSE	4.266	7	1	4	1	177	20.7	8.24	0		0								2.12		2.45								1		1								1		1
FALSE	High	Master Protein	A0A088ASN0	FAA_hydrolase domain-containing protein OS=Apis mellifera OX=7460 PE=4 SV=1		0	FALSE	46.688	51	9	56	9	249	27.5	5.34	15.34	7.28	4.53	7.11		9.2		2.17	11.78	6.18	11.45		12.37	1.7		1.62	2.29	19.88	0		5	3	2	2		4		1	6	2	3		3	1
FALSE	High	Master Protein	A0A088ALS0	F-actin-capping protein subunit beta OS=Apis mellifera OX=7460 GN=LOC409581 PE=3 SV=1		0	FALSE	4.693	5	1	3	1	273	30.8	5.72			2.69	0						2.78													1	1						1
FALSE	High	Master Protein	A0A088A7Z4	FAD-binding PCMH-type domain-containing protein OS=Apis mellifera OX=7460 PE=4 SV=1		0	FALSE	7.399	9	2	7	2	470	52.3	7.96	0		0	0					0		4.29										1		1	1					1		1
FALSE	High	Master Protein	A0A087ZYD0	FAD-binding PCMH-type domain-containing protein OS=Apis mellifera OX=7460 PE=4 SV=1		0	FALSE	8.645	4	3	3	3	1257	140.8	7.3		1.8															2.49					2
FALSE	High	Master Protein	A0A088AG10	FAST_2 domain-containing protein OS=Apis mellifera OX=7460 PE=4 SV=1		0	FALSE	17.493	10	5	11	5	525	61.1	9.06	0		3.54								8.86										1		3								4
FALSE	High	Master Protein	Q76LA3	Fatty acid binding protein OS=Apis mellifera OX=7460 GN=FABP PE=2 SV=1		0	FALSE	43.797	65	7	77	7	135	15.5	5.58	0	15.04		23.44	12.56	2	4.84		7.22	0	2.36	26.3	26.34	0	1.86		9.9	2.45			3	5		6	3	3	2		4	2	2	6	4	1
FALSE	High	Master Protein	D9MWM7	Fatty acyl-CoA reductase OS=Apis mellifera OX=7460 GN=FAR1 PE=2 SV=1		0	FALSE	11.515	8	3	5	3	516	59.1	8.29			6.92	0		0																	3	1		1
FALSE	High	Master Protein	A0A088AD05	Fatty acyl-CoA reductase OS=Apis mellifera OX=7460 PE=3 SV=1		0	FALSE	12.329	13	4	9	4	382	44	9.52			9.7			1.95			1.62		2.06			1.83									4			1			1		1			1
FALSE	High	Master Protein	A0A088AHC4	Fe-ADH domain-containing protein OS=Apis mellifera OX=7460 PE=4 SV=1		0	FALSE	10.05	28	3	3	3	149	16.6	9.25											4.15																				3
FALSE	High	Master Protein	A0A088AHC5	Fe-ADH domain-containing protein OS=Apis mellifera OX=7460 PE=4 SV=1		0	FALSE	7.492	14	2	5	2	178	19.7	7.61				0		2.15			1.62		5.37													1		1			1		2
FALSE	High	Master Protein	A0A088A9A9	FERM domain-containing protein OS=Apis mellifera OX=7460 PE=4 SV=1		0	FALSE	132.81	44	27	156	27	632	74.6	6.28	4.04		87.96	80.18	6.58	8.62		5.9	10.67	29.8	8.36		14.52	1.69	6.71	5.69			0		3		20	18	3	6		2	6	13	4		5	3
FALSE	High	Master Protein	A0A087ZZ33	FERM domain-containing protein OS=Apis mellifera OX=7460 PE=4 SV=1		0	FALSE	14.805	4	3	5	3	921	104.9	8.28			4.03	4.48					0														1	3					1
FALSE	High	Master Protein	A0A087ZXU0	Ferritin OS=Apis mellifera OX=7460 GN=Fer2LCH PE=3 SV=1		0	FALSE	15.697	23	4	21	4	217	25.2	6.54	1.82	4.44	2.62	2.62	2.17	0					3.8		4.2	0	0	0	1.95	0	0		1	2	1	1	1	1					2		2	1
FALSE	High	Master Protein	A0A087ZXW2	Ferritin OS=Apis mellifera OX=7460 PE=3 SV=1		0	FALSE	25.459	34	5	25	5	132	15.1	6.52	1.75	3.86		0	0	0		5.98		0	9.89		14.63	0				2.3			1	2		1	1	1		3		1	4		4	1
FALSE	High	Master Protein	A0A087ZU01	Ferrochelatase OS=Apis mellifera OX=7460 GN=ferrochelatase PE=3 SV=1		0	FALSE	66.142	40	12	37	12	397	45.5	8.48	4.45		59.52	2.54		0			4.62	0	7.69										4		10	1		1			4	1	3
FALSE	High	Master Protein	A0A088ASE8	Flavokinase domain-containing protein OS=Apis mellifera OX=7460 GN=LOC552134 PE=4 SV=1		0	FALSE	16.406	31	4	8	4	147	16.9	8.05	1.78										9.26							0			3										4
FALSE	High	Master Protein	A0A087ZPP8	Flavoprotein domain-containing protein OS=Apis mellifera OX=7460 GN=LOC412189 PE=4 SV=1		0	FALSE	11.089	24	3	7	3	198	22	7.21			4.66	0		0				2.61					2.47								3	1		1				1
FALSE	High	Master Protein	A0A088A5Z9	FMN hydroxy acid dehydrogenase domain-containing protein OS=Apis mellifera OX=7460 GN=LOC552771 PE=3 SV=1		0	FALSE	56.371	33	11	40	11	367	40.5	8.81			34.06	1.76		3.43					18.13			7.96		5.56							8	1		4					8			4
FALSE	High	Master Protein	A0A087ZPQ8	Fructose-bisphosphate aldolase OS=Apis mellifera OX=7460 PE=3 SV=1		0	FALSE	16.486	16	4	14	4	387	41.7	8.12			7.59	9.64					5.1	3.66				0		0							1	4					1	1				1
FALSE	High	Master Protein	A0A088ADU2	Fucosidase_C domain-containing protein OS=Apis mellifera OX=7460 GN=Fuca PE=3 SV=1		0	FALSE	17.137	14	6	33	6	471	55.7	6.47	0	23.71			3.68		9.2	1.95				13.38	2.24				2.15	2.11			1	5			2		2	1				5	2
FALSE	High	Master Protein	A0A087ZN22	Fumarylacetoacetase OS=Apis mellifera OX=7460 PE=3 SV=1		0.001	FALSE	3.787	3	1	2	1	374	41.6	6.19		3.9																				1
FALSE	High	Master Protein	A0A088A7S9	Gal_mutarotas_2 domain-containing protein OS=Apis mellifera OX=7460 GN=LOC551205 PE=3 SV=1		0	FALSE	26.923	10	8	42	8	925	106.8	6.27	7.92	9.54	4.73	6.15		2.27			0		5.26		2.91				3.02	30.91			5	1	3	4		4			1		4		2
FALSE	High	Master Protein	A0A087ZVF5	Galectin OS=Apis mellifera OX=7460 PE=4 SV=1		0.005	FALSE	2.479	5	1	1	1	320	36.7	8.18									0																				1
FALSE	High	Master Protein	K0FDG6	GB12811-like protein (Fragment) OS=Apis mellifera OX=7460 PE=2 SV=1		0	FALSE	8.128	7	1	265	1	149	14.7	4.88	9.61	37.71	13.78	4.36	9.44	18.82	25.57	18.55	3.81	9.29	12.08	41.96	10.11	30.42	28.33	4.16	77.7	43.56	112.55	8.73	1	1	1	1	1	1	1	1	1	1	1	1	1	1
FALSE	High	Master Protein	A0A088A8G7	Gb3_synth domain-containing protein OS=Apis mellifera OX=7460 PE=4 SV=1		0	FALSE	4.142	17	2	2	2	162	18.7	8.75											2.38																				2
FALSE	High	Master Protein	H9K9P8	GFO_IDH_MocA domain-containing protein OS=Apis mellifera OX=7460 GN=LOC412231 PE=4 SV=1		0	FALSE	31.704	31	9	24	9	331	36.9	6.52				5.35		0			1.61	1.86	8		0					7.58						6		1			4	1	6		1
FALSE	High	Master Protein	A0A088AA33	GGACT domain-containing protein OS=Apis mellifera OX=7460 PE=4 SV=1		0	FALSE	23.753	43	6	18	6	172	20.1	6.39	4.39					0			0		16.34										4					2			1		6
FALSE	High	Master Protein	A0A088AVP6	GIDA_assoc domain-containing protein OS=Apis mellifera OX=7460 GN=LOC410941 PE=3 SV=1		0	FALSE	5.584	5	3	3	3	659	73.8	8.32	2.11										2.19										1										2
FALSE	High	Master Protein	A0A088A2A8	Gln-synt_C domain-containing protein OS=Apis mellifera OX=7460 GN=GlnS PE=3 SV=1		0	FALSE	12.314	12	4	9	4	405	45.3	8.09			2.02	0		0					11.75			0									1	1		1					4			1
FALSE	High	Master Protein	A0A087ZZS2	Glucosamine 6-phosphate N-acetyltransferase OS=Apis mellifera OX=7460 GN=LOC411757 PE=3 SV=1		0	FALSE	3.674	11	1	1	1	189	22	7.49		0																				1
FALSE	High	Master Protein	A0A0G8BG45	Glucose-6-phosphate 1-dehydrogenase OS=Serratia marcescens OX=615 GN=zwf PE=3 SV=1		0.001	FALSE	3.433	2	1	1	1	491	55.8	6.49			2.25																				1
FALSE	High	Master Protein	A0A087ZPV4	Glucose-6-phosphate isomerase OS=Apis mellifera OX=7460 GN=LOC551154 PE=3 SV=1		0	FALSE	10.68	7	3	4	3	557	62.9	7.91			1.71	3.59																			1	3
FALSE	High	Master Protein	A0A088APM4	Glucosylceramidase OS=Apis mellifera OX=7460 GN=LOC409708 PE=3 SV=1		0	FALSE	32.279	21	11	49	11	522	59.3	5.57		18.67	0		5.07		18.71	4.44		2.22		9.82			4.7	2.09	7.07	4.38				8	1		2		5	4		1		7
FALSE	High	Master Protein	A0A088APM5	Glucosylceramidase OS=Apis mellifera OX=7460 GN=LOC409709 PE=3 SV=1		0	FALSE	10.808	10	4	9	4	511	58.5	7.39	0	4.9					0					1.75					2.62	0			1	1					1					1
FALSE	High	Master Protein	A0A088A6Y8	Glutamine amidotransferase type-2 domain-containing protein OS=Apis mellifera OX=7460 PE=4 SV=1		0	FALSE	13.397	3	3	4	3	1909	211.9	7.34			7.37	1.6																			3	1
FALSE	High	Master Protein	A0A087ZS80	Glutaredoxin domain-containing protein OS=Apis mellifera OX=7460 GN=Grx1 PE=4 SV=1		0	FALSE	5.584	35	2	2	2	98	10.9	6.52									0																				2
FALSE	High	Master Protein	A0A088A226	Glutaredoxin OS=Apis mellifera OX=7460 GN=Grx2 PE=3 SV=1		0	FALSE	18.438	32	4	11	4	133	15	7.99	6.91		2.96			0					9.64										3		1			1					3
FALSE	High	Master Protein	Q7YXM2	Glutathione peroxidase OS=Apis mellifera ligustica OX=7469 GN=Gtpx-1 PE=2 SV=1		0	FALSE	28.612	62	9	38	9	168	19.1	7.78	6.84			4.92		0			5.58	4.52	19.37		2.6	0	1.73	0		2.14			4			3		2			4	3	8		1	1
FALSE	High	Master Protein	C3VMN1	Glutathione S-transferase S1 OS=Apis mellifera OX=7460 GN=GstS1 PE=2 SV=1		0	FALSE	46.103	32	7	99	7	204	23.7	8.81	10.72		17.42	15.03	1.93	12.07		5.83	21.86	7.75	31.28		16.55	5.14	0	0	0	4.96			5		4	6	1	4		4	7	6	6		4	4
FALSE	High	Master Protein	V5T6H1	Glyceraldehyde 3-phosphate dehydrogenase OS=Lactobacillus helsingborgensis OX=1218494 GN=gap PE=3 SV=1		0	FALSE	30.435	22	6	26	5	338	36.3	6.05		3.97	7.78					24.07				2.06					2.01	1.82	0			1	3					6				1
FALSE	High	Master Protein	R0MC05	Glyceraldehyde-3-phosphate dehydrogenase 2 OS=Nosema bombycis (strain CQ1 / CVCC 102059) OX=578461 GN=G3P2 PE=4 SV=1		0	FALSE	7.414	7	1	4	1	203	22.6	8.38	3.33											1.69		3							1											1		1
FALSE	High	Master Protein	A5JMN9	Glyceraldehyde-3-phosphate dehydrogenase A (Fragment) OS=Pectobacterium carotovorum subsp. carotovorum OX=555 GN=gapA PE=4 SV=1		0	FALSE	13.672	34	3	29	1	136	14.3	8.84	1.64		15.53	3.78	1.62	3.69		1.93	0	2.01	4.07		2.17	1.79	2.01		1.85	5.55	5.77		1		3	1	1	2		1	1	1	1		1	1
FALSE	High	Master Protein	A0A088AHC8	Glyceraldehyde-3-phosphate dehydrogenase OS=Apis mellifera OX=7460 GN=Gapdh PE=2 SV=1		0	FALSE	104.072	52	13	431	11	333	35.9	8.02	13.8	153.22	67.81	45.17	17.45	17.29	37.18	56.55	3.2	22.37	51.55	77.7	43.27	19.75	16.13		149.47	396.45	25.24		6	12	9	10	5	9	5	9	6	6	8	9	9	5
FALSE	High	Master Protein	A0A087ENY4	Glyceraldehyde-3-phosphate dehydrogenase OS=Lactobacillus kunkeei OX=148814 GN=gap-3 PE=3 SV=1		0	FALSE	30.269	26	8	33	7	337	36.3	5.25		44.06					21	2.68				2.06					2.01	1.82				8					6	2				1
FALSE	High	Master Protein	A0A0P0QFJ0	Glyceraldehyde-3-phosphate dehydrogenase OS=Serratia marcescens OX=615 GN=AR325_16545 PE=3 SV=1		0	FALSE	13.3	14	4	45	2	331	35.5	6.81	1.64	7.82	8.59	3.78	1.62	5.67		1.93	0	2.01	4.07	10.13	2.17	1.79	2.01		10.93	16.97	5.77		1	1	2	2	1	2		1	1	1	1	1	1	1
FALSE	High	Master Protein	O61368	Glycerol-3-phosphate dehydrogenase [NAD(+)] OS=Apis mellifera OX=7460 GN=Gpdh PE=3 SV=1		0	FALSE	103.864	50	14	156	14	363	40.1	7.06	30.73		47.32	56.54		13.66		2.29	34.16	30.46	35.78		1.95	5.8							9		7	14		8		1	13	9	11		1	8
FALSE	High	Master Protein	A0A087ZSL0	Glycerol-3-phosphate dehydrogenase OS=Apis mellifera OX=7460 PE=3 SV=1		0	FALSE	304.098	57	35	670	35	753	84.2	6.81	207.28	18.25	333.11	59.76	113.6	54.12	12.99	112.51	113.33	61.33	181.36	8.31	100.24	39.62	29.27	0	33.52	54.56		4.6	25	6	33	18	20	18	6	21	25	19	27	4	17	16
FALSE	High	Master Protein	A0A087ZUC1	Glyco_18 domain-containing protein OS=Apis mellifera OX=7460 GN=100577156 PE=4 SV=1		0	FALSE	224.714	59	21	1337	21	390	43.8	6.27	71.44	272.78	13.39	98.7	335.28	43.15	101.22	201.86	113.6	49.81	75.55	178.07	169.3	34.07	24.84	2.5	585.47	667.67		0	13	15	4	14	18	12	8	18	16	13	14	14	15	12
FALSE	High	Master Protein	A0A088AMK2	Glyco_18 domain-containing protein OS=Apis mellifera OX=7460 PE=4 SV=1		0	FALSE	20.068	14	4	16	4	449	50.1	8.44	9.43			8.35					5.33					1.8							4			2					3					2
FALSE	High	Master Protein	A0A088A3B7	Glyco_transf_20 domain-containing protein OS=Apis mellifera OX=7460 PE=4 SV=1		0	FALSE	60.467	24	16	32	16	771	87.2	6.62			51.31	7.66		0				11.24	3.56			0									14	3		1				2	2			2
FALSE	High	Master Protein	A0A088ARU9	Glycogen [starch] synthase OS=Apis mellifera OX=7460 GN=LOC552328 PE=3 SV=1		0	FALSE	7.216	5	2	2	2	692	79.6	6.42										3.99																				2
FALSE	High	Master Protein	A0A087ZVX4	GMC_OxRdtase_N domain-containing protein OS=Apis mellifera OX=7460 GN=GMCOX12 PE=4 SV=1		0	FALSE	7.594	7	3	7	3	622	69.4	6.96		5.51										2.81						0				2										2
FALSE	High	Master Protein	A0A087ZVX2	GMC_OxRdtase_N domain-containing protein OS=Apis mellifera OX=7460 PE=4 SV=1		0	FALSE	24.592	12	7	28	7	650	73	6.25		25.9			2.08	1.78	10.17				2.1	1.71	2.6				0					5			1	1	3				2	2	1
FALSE	High	Master Protein	A0A087ZPR9	GMP reductase OS=Apis mellifera OX=7460 GN=LOC552316 PE=3 SV=1		0	FALSE	21.272	16	4	7	4	349	37.9	7.39						10.96												2.75								4
FALSE	High	Master Protein	A0A088AGB1	GOLD domain-containing protein OS=Apis mellifera OX=7460 GN=LOC412554 PE=3 SV=1		0	FALSE	26.244	26	4	23	4	215	25.3	7.01	7.92	2.68	3.63	6.65		4.8			2.2		14.08	2.33	9.94	0				1.83			3	1	1	2		2			2		4	1	2	1
FALSE	High	Master Protein	A0A088ANQ5	GOLD domain-containing protein OS=Apis mellifera OX=7460 GN=LOC552602 PE=3 SV=1		0	FALSE	4.241	10	2	2	2	205	23.4	5.62	0																	2.72			1
FALSE	High	Master Protein	A0A087ZNT8	GOLD domain-containing protein OS=Apis mellifera OX=7460 PE=3 SV=1		0	FALSE	8.341	16	3	6	3	202	23.4	7.33	2.79		4.1	2.87							1.76										1		2	1							2
FALSE	High	Master Protein	A0A088AP70	GRAM domain-containing protein OS=Apis mellifera OX=7460 GN=LOC410012 PE=4 SV=1		0	FALSE	4.24	4	1	2	1	295	32.6	7.08								2.71					2.79															1					1
FALSE	High	Master Protein	A0A088AGJ6	GrpE protein homolog OS=Apis mellifera OX=7460 PE=3 SV=1		0	FALSE	7.004	9	2	10	2	232	26.4	8.1	0		7.48			0			2.01	1.69	2.51										2		2			1			2	1	1
FALSE	High	Master Protein	A0A087ZWI7	GTP-binding nuclear protein OS=Apis mellifera OX=7460 GN=ran PE=3 SV=1		0	FALSE	7.068	18	3	8	3	215	24.6	7.42	2.08		3.73	5.86					2.88		0										1		1	3					1		1
FALSE	High	Master Protein	A0A1B4XQK5	GTP-binding protein TypA OS=Enterococcus faecalis OX=1351 GN=typA PE=4 SV=1		0	FALSE	5.268	3	1	1	1	611	68.3	5							3.87																				1
FALSE	High	Master Protein	A0A088A648	Guanylate kinase-like domain-containing protein OS=Apis mellifera OX=7460 GN=LOC552023 PE=4 SV=1		0	FALSE	16.327	20	3	5	3	208	23.8	8.12	7.65										4.02										3										2
FALSE	High	Master Protein	H9KUJ6	HATPase_c domain-containing protein OS=Apis mellifera OX=7460 GN=LOC412150 PE=3 SV=1		0	FALSE	65.124	22	15	67	13	798	92.1	5.07	21.33		17.12	2.97		20.81			9.86	7.04	25.53		1.94	2.74	1.75	0		0			9		5	3		9			4	2	8		1	2
FALSE	High	Master Protein	A0A088A2L4	HATPase_c domain-containing protein OS=Apis mellifera OX=7460 PE=3 SV=1		0	FALSE	24.767	11	7	20	4	755	87.1	5.2	2.8		5.7	4.25		3.14			2.84		7.25			0			5.79	2.01			1		3	2		1			1		3			1
FALSE	High	Master Protein	A0A087ZQD3	HATPase_c domain-containing protein OS=Apis mellifera OX=7460 PE=3 SV=1		0	FALSE	66.476	21	12	56	7	724	83.4	5.05	6.64	2.31	18.58	8.97		12.29	3.15		11.18	3.51	12.92	8.38		2.74	1.75		20.31				2	1	6	4		3	1		5	2	5	2		2
FALSE	High	Master Protein	A0A088ADW1	HD domain-containing protein OS=Apis mellifera OX=7460 GN=LOC552583 PE=4 SV=1		0	FALSE	12.881	25	4	16	4	220	25.5	6.86				5.97		0				4.21				0										3		2				3				2
FALSE	High	Master Protein	A0A0F9WFB6	Heat shock protein 70 OS=Nosema ceranae OX=40302 GN=AAJ76_210002401 PE=3 SV=1		0.007	FALSE	2.359	2	1	1	1	678	74.3	5.41									0																				1
FALSE	High	Master Protein	A0A088AQM3	HIG1 domain-containing protein OS=Apis mellifera OX=7460 GN=102656599 PE=4 SV=1		0	FALSE	5.755	11	1	3	1	106	11.9	9.36						2.07			2.61					0												1			1					1
FALSE	High	Master Protein	A0A088A803	Histone H2A OS=Apis mellifera OX=7460 GN=726468 PE=3 SV=1		0	FALSE	32.568	55	4	27	4	124	13.4	10.73	1.85		5.92	2.16		1.9		1.71	4.52	3.86	9.94		3.73	3.83	1.75	24.42					1		2	1		1		1	2	2	2		2	2
FALSE	High	Master Protein	A0A088A824	Histone H2B OS=Apis mellifera OX=7460 GN=725344 PE=3 SV=1		0	FALSE	45.336	37	5	90	3	123	13.7	10.39	15.19		60.94	35.72	4.57	5.16		7.77	29.29	11.95	10.36		2.97	5.47							3		5	5	3	3		3	4	3	2		2	1
FALSE	High	Master Protein	A0A088A805	Histone H2B OS=Apis mellifera OX=7460 GN=726487 PE=3 SV=1		0	FALSE	20.854	28	3	40	1	126	14	10.32	1.79		25.44	18.36	0	0		0	5.19	1.73	2.34		0								2		3	3	1	1		1	2	2	1		1
FALSE	High	Master Protein	H9K759	Histone H3 OS=Apis mellifera OX=7460 GN=LOC726692 PE=3 SV=1		0	FALSE	7.88	21	4	17	4	136	15.3	11.27	7.55		10.55	1.87					0		0			0		1.62					3		3	1					1		1			1
FALSE	High	Master Protein	H9KL77	Histone H4 OS=Apis mellifera OX=7460 GN=724757 PE=3 SV=1		0	FALSE	64.766	53	8	139	8	103	11.4	11.36	63.49		56.83	39.84	6.18	16.11		9.45	34.12	16.72	20.99		13.87	20.38	5.07	6.53					8		8	7	3	4		3	6	4	4		3	4
FALSE	High	Master Protein	A0A088AA27	HIT domain-containing protein OS=Apis mellifera OX=7460 PE=4 SV=1		0	FALSE	17.716	25	2	13	2	126	14	7.59	3.42			0		2.07			0	3.12	10.35			0							1			2		1			1	1	2			1
FALSE	High	Master Protein	A0A087ZX65	Hydrolase_4 domain-containing protein OS=Apis mellifera OX=7460 GN=LOC413279 PE=4 SV=1		0	FALSE	8.965	5	1	3	1	286	31.9	5.85			6.28		2.07																		1		1
FALSE	High	Master Protein	A0A096XH51	Icarapin variant 1 (Fragment) OS=Apis mellifera carnica OX=88217 GN=icarapin PE=2 SV=1		0	FALSE	7.592	10	2	7	2	204	22.7	4.56										4.99	0				4.02	0														2	1
FALSE	High	Master Protein	A0A087ZP77	IF3_N domain-containing protein OS=Apis mellifera OX=7460 PE=4 SV=1		0.001	FALSE	3.285	4	1	3	1	227	26.8	9.61	0		2.47						0												1		1						1
FALSE	High	Master Protein	A0A088A9P3	Importin N-terminal domain-containing protein OS=Apis mellifera OX=7460 GN=LOC412817 PE=4 SV=1		0.006	FALSE	2.439	1	1	1	1	1080	121.4	4.84				1.62																				1
FALSE	High	Master Protein	A0A088AFX0	Importin N-terminal domain-containing protein OS=Apis mellifera OX=7460 PE=4 SV=1		0.001	FALSE	3.133	1	1	1	1	1011	115.7	5.34			1.99																				1
FALSE	High	Master Protein	A0A088A2C9	Innexin OS=Apis mellifera OX=7460 GN=inx2 PE=3 SV=1		0	FALSE	111.058	31	10	206	10	358	41.5	6.84	45.88		91.71	29.74	14.91	28.71		9.67	58.13	29.51	44.67	1.89	23.53	16.69	31.3	3.91	3.57		0	11.68	8		9	7	4	7		5	8	7	7	1	4	7
FALSE	High	Master Protein	A0A088AID2	Innexin OS=Apis mellifera OX=7460 GN=inx3 PE=3 SV=1		0	FALSE	12.323	18	5	5	5	396	44.6	7.68			6.19							2.12						0							3							1
FALSE	High	Master Protein	A0A088A2D0	Innexin OS=Apis mellifera OX=7460 GN=inx7 PE=3 SV=1		0	FALSE	69.301	26	9	209	9	408	46.9	7.59	36.73	1.86	56.73	31.39	22.25	25.37	1.93	18.63	54.78	34.84	38.34	0	28.28	10.2	26.64	1.6	4.48	21.22	0	9.36	5	2	6	7	4	7	1	5	7	7	7	2	5	5
FALSE	High	Master Protein	A0A088A653	Inosine-5'-monophosphate dehydrogenase OS=Apis mellifera OX=7460 GN=ras PE=3 SV=1		0	FALSE	29.199	11	6	54	6	523	56.6	8.15	2.23	5.86	4.27	4.96	7.02	11.31	4.74	10.28		7.59	8.54		5.75	3.9	7.31			5.36			1	3	1	5	4	6	2	5		5	4		2	5
FALSE	High	Master Protein	A0A088AVE7	Inositol-1-monophosphatase OS=Apis mellifera OX=7460 GN=726463 PE=3 SV=1		0	FALSE	25.944	20	5	24	5	276	30.8	6.43			4.71	23.16		4.25				4.72	2.29			3.67	1.7	0							2	5		2				2	1			3
FALSE	High	Master Protein	A0A088A4S7	Inositol-1-monophosphatase OS=Apis mellifera OX=7460 GN=LOC409693 PE=3 SV=1		0	FALSE	13.782	20	4	9	4	272	29.8	5.82				2.59					5.16				8.3											2					3				2
FALSE	High	Master Protein	A0A088AEN2	Integrin alpha-PS2 OS=Apis mellifera OX=7460 PE=3 SV=1		0	FALSE	19.124	3	5	13	5	1525	172.2	5.86			13.85		5.99					7.82													4		2					4
FALSE	High	Master Protein	A0A088A188	Integrin beta OS=Apis mellifera OX=7460 GN=100576742 PE=3 SV=1		0.001	FALSE	3.41	1	1	1	1	787	89.2	5.69			2.64																				1
FALSE	High	Master Protein	A0A088A788	Integrin beta OS=Apis mellifera OX=7460 PE=3 SV=1		0	FALSE	56.839	20	10	48	10	761	84.9	5.49			51.15	0	19.94	0		16.7	2.01	12.32	0				0								10	1	6	1		4	1	5	1
FALSE	High	Master Protein	A0A088ACX9	Integrin_alpha2 domain-containing protein OS=Apis mellifera OX=7460 GN=mew PE=3 SV=1		0	FALSE	12.409	4	3	4	3	1101	123.7	6.18			9.92																				3
FALSE	High	Master Protein	A0A088AKC5	Iso_dh domain-containing protein OS=Apis mellifera OX=7460 GN=LOC410396 PE=4 SV=1		0	FALSE	85.428	48	13	71	13	384	42.4	8.97	24.87		41.45	3.07		10.86			12.92	2.64	55.12			1.81		2.02			0		8		8	1		6			5	1	11			3
FALSE	High	Master Protein	A0A088AA38	Isochorismatase domain-containing protein OS=Apis mellifera OX=7460 GN=LOC410420 PE=4 SV=1		0	FALSE	16.49	19	3	16	3	203	22.4	8.35	3.69		5	1.71		0			3.9	1.99	9.21			2							1		2	1		1			2	1	3			1
FALSE	High	Master Protein	A0A088AAU7	Isocitrate dehydrogenase [NAD] subunit, mitochondrial OS=Apis mellifera OX=7460 GN=LOC409292 PE=3 SV=1		0	FALSE	109.512	54	18	111	18	358	39.1	7.59	69.15		43.67	2.28		27.59			7.24	2.97	79.39			0		2.35					15		10	1		11			4	2	16			2
FALSE	High	Master Protein	A0A088ABZ1	Isocitrate dehydrogenase [NAD] subunit, mitochondrial OS=Apis mellifera OX=7460 GN=LOC552128 PE=3 SV=1		0	FALSE	68.447	44	10	61	10	374	40.9	8.7	18.48		35.49	1.67		2.08			3.31	1.69	41.26			2.25							8		6	1		3			3	2	8			2
FALSE	High	Master Protein	A0A088A1Z9	Isocitrate dehydrogenase [NADP] OS=Apis mellifera OX=7460 PE=3 SV=1		0	FALSE	111.373	51	18	169	18	409	46.6	7.3	49.25		33.09	19.29	0	27.03		2.34	25.99	19.18	73.95		2.03	9.4		19.66					13		10	7	1	9		1	8	4	14		2	3
FALSE	High	Master Protein	A0A093SSK5	Isocitrate dehydrogenase [NADP] OS=Pectobacterium carotovorum subsp. carotovorum OX=555 GN=KP17_00210 PE=4 SV=1		0	FALSE	5.139	4	1	2	1	417	45.9	5.2			5.33																				1
FALSE	High	Master Protein	A0A087ZSR8	J domain-containing protein OS=Apis mellifera OX=7460 GN=LOC408966 PE=4 SV=1		0.006	FALSE	2.439	7	1	2	1	290	32.6	9.47											0		0																		1		1
FALSE	High	Master Protein	A0A087ZY83	J domain-containing protein OS=Apis mellifera OX=7460 GN=LOC409991 PE=4 SV=1		0	FALSE	22.481	9	3	19	3	561	64	8.06	1.68		11.81		2.21	0		2.2			5.47		5.23								2		3		1	1		1			2		2
FALSE	High	Master Protein	A0A088A635	J domain-containing protein OS=Apis mellifera OX=7460 GN=LOC411071 PE=4 SV=1		0	FALSE	11.766	13	3	7	3	354	39.1	9.13				5.45					2.11	0														2					1	1
FALSE	High	Master Protein	A0A088AEP5	J domain-containing protein OS=Apis mellifera OX=7460 PE=4 SV=1		0	FALSE	11.136	11	2	4	2	223	24.4	5.11			5.38																				2
FALSE	High	Master Protein	A0A088AEW6	Kazal-like domain-containing protein OS=Apis mellifera OX=7460 GN=102656354 PE=4 SV=1		0	FALSE	4.818	18	1	2	1	119	12.4	8.54	0								0												1								1
FALSE	High	Master Protein	A0A088AI24	Kazal-like domain-containing protein OS=Apis mellifera OX=7460 GN=LOC726470 PE=4 SV=1		0	FALSE	87.917	20	11	82	11	976	107.9	7.2	7.48	1.74	63.7	6.29	11.29	6.98		9	28.92	14.31	5.17		2.85	0	2.54			4.57			2	1	9	2	1	3		1	8	5	2		2	2
FALSE	High	Master Protein	A0A088AV85	KH type-2 domain-containing protein OS=Apis mellifera OX=7460 GN=RpS3 PE=4 SV=1		0	FALSE	29.3	32	7	45	7	242	26.8	9.66	5.39	2.05	12.14	10.54	2.36	1.9		1.64	5.74	3.68	13.62			0	1.75	0					3	1	4	3	2	2		2	5	2	5			2
FALSE	High	Master Protein	A0A088AV41	KOW domain-containing protein OS=Apis mellifera OX=7460 GN=mRpL24 PE=3 SV=1		0	FALSE	9.588	10	2	6	2	253	30.1	9.79	0		2.13			0					6.62										1		1			1					2
FALSE	High	Master Protein	A0A088AEV2	KOW domain-containing protein OS=Apis mellifera OX=7460 GN=RpL26 PE=4 SV=1		0	FALSE	5.405	14	2	5	2	148	17.4	10.86	1.78					0					3.79										2					1					2
FALSE	High	Master Protein	A0A088AVX5	L51_S25_CI-B8 domain-containing protein OS=Apis mellifera OX=7460 GN=LOC727049 PE=4 SV=1		0	FALSE	25.853	55	5	41	5	94	11	9.45	9.88		22.6	0		4.61		1.69	7.74	1.68	15.75		1.81								3		4	2		5		1	5	1	5		1
FALSE	High	Master Protein	A0A088AGJ0	L51_S25_CI-B8 domain-containing protein OS=Apis mellifera OX=7460 GN=mRpL43 PE=4 SV=1		0	FALSE	15.94	26	4	10	4	191	22.5	8.73			7.75								5.2		3.76										2								4		1
FALSE	High	Master Protein	A0A087ZV44	L51_S25_CI-B8 domain-containing protein OS=Apis mellifera OX=7460 GN=mRpS25 PE=4 SV=1		0	FALSE	15.886	30	4	10	4	169	19.5	9	2.38		6.4								8.35										2		2								4
FALSE	High	Master Protein	A0A088AAM8	Lactamase_B domain-containing protein OS=Apis mellifera OX=7460 GN=LOC410023 PE=4 SV=1		0	FALSE	19.46	26	6	11	6	276	31	7.34	2.12		1.62						0		8.72										3		1						2		3
FALSE	High	Master Protein	A0A087ZZF5	Lactamase_B domain-containing protein OS=Apis mellifera OX=7460 PE=3 SV=1		0	FALSE	18.215	21	6	15	6	298	34.1	7.27	2.82	4.98									2.66		5.14					15.63			2	2									1		2
FALSE	High	Master Protein	A0A088ALN9	Lactoylglutathione lyase OS=Apis mellifera OX=7460 PE=3 SV=1		0	FALSE	21.023	41	6	39	6	183	21.1	5.64	2.4	6.19		10.53		0			0			3.24		0			4.74	39.4			1	2		4		1			1			2		1
FALSE	High	Master Protein	A0A088AFH0	LAM_G_DOMAIN domain-containing protein OS=Apis mellifera OX=7460 PE=4 SV=1		0	FALSE	16.177	5	5	14	5	1428	159.6	4.82					12.16			6.55					7.66				4.52	0							4			2					1
FALSE	High	Master Protein	A0A088A0L8	LEM domain-containing protein OS=Apis mellifera OX=7460 PE=4 SV=1		0.001	FALSE	3.067	1	1	1	1	788	89.3	8.32			1.72																				1
FALSE	High	Master Protein	A0A088AAR0	Letm1 RBD domain-containing protein OS=Apis mellifera OX=7460 GN=LOC727277 PE=4 SV=1		0	FALSE	7.045	7	2	5	2	346	41.6	9.98	0		4.64						0		2.36										1		2						1		1
FALSE	High	Master Protein	A0A087ZZ69	Ligase_CoA domain-containing protein OS=Apis mellifera OX=7460 PE=4 SV=1		0	FALSE	31.024	73	6	15	4	118	12.6	8.69	6.66		4.07			1.94			2.1		19.17					0					2		1			1			1		5
FALSE	High	Master Protein	A0A088A8B0	LIM domain-containing protein OS=Apis mellifera OX=7460 GN=LOC551547 PE=4 SV=1		0.001	FALSE	3.14	3	1	5	1	342	39.5	7.93				0					0	0														1					1	1
FALSE	High	Master Protein	A0A087ZXA2	Lipase domain-containing protein OS=Apis mellifera OX=7460 GN=LOC551268 PE=3 SV=1		0	FALSE	7.082	13	3	3	3	303	33.6	6.87					4.9			2.15																	2			1
FALSE	High	Master Protein	A0A087ZXA0	Lipase domain-containing protein OS=Apis mellifera OX=7460 GN=LOC727193 PE=3 SV=1		0	FALSE	11.184	12	2	2	2	304	34.1	6.79		7.78																				2
FALSE	High	Master Protein	A0A087ZXA8	Lipase domain-containing protein OS=Apis mellifera OX=7460 PE=3 SV=1		0	FALSE	14.041	20	4	28	4	312	34.6	8.38		8.51			12.59		6.04	1.95		2.32	8.07	1.73	1.95		6.53							3			2		2	1		2	2	3	1
FALSE	High	Master Protein	A0A088AQK3	Lipase domain-containing protein OS=Apis mellifera OX=7460 PE=3 SV=1		0	FALSE	35.593	25	5	34	5	359	39.9	6.6	2.4			8.42	6.11	10.7		5.64		14.84	8.04	2.25	7.84	3.64	15.95						1			2	3	4		2		4	3	1	2	3
FALSE	High	Master Protein	A0A088AN52	Lipase maturation factor OS=Apis mellifera OX=7460 GN=LOC724741 PE=3 SV=1		0.001	FALSE	3.072	2	1	2	1	648	75.6	9.26	0					0															1					1
FALSE	High	Master Protein	A0A087ZSH4	Lipase OS=Apis mellifera OX=7460 PE=3 SV=1		0	FALSE	43.047	32	10	56	10	406	46.5	6.96		16.73	12.82		23.41	0	12.43	11.46		0	2.94				8.63		0	4.29		2.1		6	3		8	2	2	4		1	3
FALSE	High	Master Protein	A0A087ZPP1	Lipocln_cytosolic_FA-bd_dom domain-containing protein OS=Apis mellifera OX=7460 GN=LOC410034 PE=3 SV=1		0	FALSE	4.203	15	2	3	2	200	23	6.8									1.86									4.56											1
FALSE	High	Master Protein	A0A088A4R2	Lipocln_cytosolic_FA-bd_dom domain-containing protein OS=Apis mellifera OX=7460 PE=3 SV=1		0	FALSE	6.593	6	1	6	1	296	33.2	7.53			6.52	1.89				0	1.73	2.21													1	1				1	1	1
FALSE	High	Master Protein	A0A087ZZR9	Lipoyl-binding domain-containing protein OS=Apis mellifera OX=7460 GN=LOC409155 PE=4 SV=1		0	FALSE	107.901	30	13	134	13	514	55.6	9.11	49.2		114.43	21.57		14.9	1.94	0	53.95	16.13	27.38		5.11	3.75		0	1.63	8.99			9		10	7		4	1	1	10	4	4		2	3
FALSE	High	Master Protein	A0A088AU53	LITAF domain-containing protein OS=Apis mellifera OX=7460 GN=LOC725688 PE=4 SV=1		0.009	FALSE	2.316	15	1	3	1	102	11.4	6.62			2.44						0				2.6										1						1				1
FALSE	High	Master Protein	A0A087EN16	L-lactate dehydrogenase OS=Lactobacillus kunkeei OX=148814 GN=ldh PE=3 SV=1		0	FALSE	5.868	7	2	3	2	316	33.6	5		4.56					2.06															2					1
FALSE	High	Master Protein	A0A088A462	Lon protease homolog, mitochondrial OS=Apis mellifera OX=7460 GN=LOC409459 PE=3 SV=1		0	FALSE	72.847	20	12	51	12	1012	114.7	8.4	12.03		10.66	2.54		2.74			4.56	5.23	42.17		2.35	0		2.84					6		4	1		1			5	3	12		1	1
FALSE	High	Master Protein	A0A088AI22	LRRCT domain-containing protein OS=Apis mellifera OX=7460 PE=4 SV=1		0	FALSE	4.722	2	1	1	1	691	76	5.05	2.46																				1
FALSE	High	Master Protein	A0A088AEZ9	L-type lectin-like domain-containing protein OS=Apis mellifera OX=7460 GN=Lman2 PE=4 SV=1		0	FALSE	11.501	12	3	5	3	324	37.1	6.73											2.03							11.53													1
FALSE	High	Master Protein	A0A088AEI5	L-type lectin-like domain-containing protein OS=Apis mellifera OX=7460 GN=LOC550798 PE=4 SV=1		0	FALSE	4.395	2	1	2	1	504	57.8	6.38																		1.68
FALSE	High	Master Protein	A0A088AHQ9	Lyase_1 domain-containing protein OS=Apis mellifera OX=7460 PE=3 SV=1		0	FALSE	79.047	36	12	71	12	439	47.7	7.77	31.14		16.74	6.64		16.75			12.44	3.45	54.12		1.64	1.67					0		8		3	3		6			4	1	10		1	3
FALSE	High	Master Protein	A0A088ACI9	Lysine--tRNA ligase OS=Apis mellifera OX=7460 GN=Aats-lys PE=3 SV=1		0	FALSE	11.717	6	3	11	3	587	67.6	6.51			0	0					5.52	0	2.12												1	1					3	1	2
FALSE	High	Master Protein	A0A221HHC4	Lytic transglycosylase OS=Serratia marcescens OX=615 GN=BVG84_00985 PE=4 SV=1		0	FALSE	4.285	2	1	1	1	473	52	9.88			2.37																				1
FALSE	High	Master Protein	A0A088ADA3	M16C_associated domain-containing protein OS=Apis mellifera OX=7460 GN=PITRM1 PE=4 SV=1		0	FALSE	18.748	8	6	8	6	1033	119.5	6.77	2.45										6.61		2.02								4										3		1
FALSE	High	Master Protein	A0A087ZSU7	M20_dimer domain-containing protein OS=Apis mellifera OX=7460 GN=LOC408969 PE=4 SV=1		0	FALSE	72.085	55	15	74	15	401	45.3	5.44		45.04	0	1.65			12.45					37.62					50.99	13.47				10	1	2			3					10
FALSE	High	Master Protein	A0A088ADU9	M20_dimer domain-containing protein OS=Apis mellifera OX=7460 GN=LOC412393 PE=4 SV=1		0	FALSE	86.76	36	14	155	14	481	54.2	6.43	5.63	33.97	2.41	10.61	12.54	8.3	9.33	14.9	17.29	2.29	26.54	13.62	23.29	0	7.05		11.62	135.35			3	4	3	6	5	4	3	4	8	2	6	4	5	3
FALSE	High	Master Protein	A0A088A5N8	Mab-21 domain-containing protein OS=Apis mellifera OX=7460 PE=4 SV=1		0	FALSE	15.279	4	5	23	5	1286	149.4	6.07	1.93		5.05	0		0			1.86	0	4.04		0	0							1		2	2		3			4	1	2		2	1
FALSE	High	Master Protein	A0A088AT64	Macro domain-containing protein OS=Apis mellifera OX=7460 PE=4 SV=1		0	FALSE	5.799	4	2	7	2	490	55.9	6.8			2.08	0					4.66	0													1	1					2	1
FALSE	High	Master Protein	O18330	Major royal jelly protein 1 OS=Apis mellifera OX=7460 GN=MRJP1 PE=1 SV=1		0	FALSE	180.007	56	23	94	23	432	48.9	5.34	22.56										193.33										11										21
FALSE	High	Master Protein	O77061	Major royal jelly protein 2 OS=Apis mellifera OX=7460 GN=MRJP2 PE=1 SV=1		0	FALSE	62.965	27	13	32	11	452	51	7.27	6.05										53.93										4										13
FALSE	High	Master Protein	Q17060	Major royal jelly protein 3 OS=Apis mellifera OX=7460 GN=MRJP3 PE=1 SV=1		0	FALSE	37.166	18	8	15	2	544	61.6	6.96	5.46										28.59										3										8
FALSE	High	Master Protein	B3GM12	Major royal jelly protein 9 OS=Apis mellifera OX=7460 GN=MRJP9 PE=2 SV=1		0	FALSE	4.572	3	1	2	1	422	48.5	8.53								2.16							1.9													1
FALSE	High	Master Protein	A5JN08	Malate dehydrogenase (Fragment) OS=Pectobacterium carotovorum subsp. carotovorum OX=555 GN=mdh PE=3 SV=1		0	FALSE	3.997	8	1	4	1	144	15.1	8.81				0		3.61																		1		1
FALSE	High	Master Protein	A0A087ZUK9	Malate dehydrogenase OS=Apis mellifera OX=7460 GN=LOC408950 PE=3 SV=1		0	FALSE	91.906	61	16	153	16	338	35.8	9.29	64.53		28.72	50.67		29.47			63.96	8.33	29.08		3.42	4.11		1.91					16		8	14		13			16	4	10		1	4
FALSE	High	Master Protein	A0A087ZYQ1	Malate dehydrogenase OS=Apis mellifera OX=7460 GN=LOC411014 PE=3 SV=1		0	FALSE	28.476	21	5	12	5	333	36.1	6.71	0			2.83	2.11				2.46				7.86					4.24	4.92		2			1	2				1				2
FALSE	High	Master Protein	A0A087ZPN7	Malectin domain-containing protein OS=Apis mellifera OX=7460 PE=4 SV=1		0	FALSE	4.934	8	2	2	2	287	32.7	5.17																		1.78
FALSE	High	Master Protein	A0A088AES7	Malic enzyme OS=Apis mellifera OX=7460 GN=Mdh PE=3 SV=1		0	FALSE	78.207	37	16	50	16	625	69.7	7.64	12.92		9.55			0			3.65	0	25.44		14.98			0					11		2			2			7	1	10		5
FALSE	High	Master Protein	A0A087ZPM2	Mast cell degranulating peptide OS=Apis mellifera OX=7460 GN=Mcdp PE=4 SV=1		0	FALSE	6.8	18	1	62	1	50	5.8	9.77	2.02	0		0	0	0			0	0	0	0	0	0							1	1		1	1	1			1	1	1	1	1	1
FALSE	High	Master Protein	A0A088A676	Maxi-like antifreeze protein OS=Apis mellifera OX=7460 GN=102654146 PE=2 SV=1		0	FALSE	129.245	73	14	55	14	364	37	6.64	119.16		0															26.08	14.74		14		1
FALSE	High	Master Protein	A0A088AW52	MCU domain-containing protein OS=Apis mellifera OX=7460 PE=4 SV=1		0	FALSE	9.616	8	2	4	2	339	39.2	7.01			6.96																				2
FALSE	High	Master Protein	P01501	Melittin OS=Apis mellifera OX=7460 GN=MELT PE=1 SV=1		0	FALSE	48.943	21	2	109	2	70	7.6	4.72	121.29	5.99		19.3	10.27	6.93			22.09	16.4	23.11	0	4.56	12.57		12.44					2	1		2	2	2			2	2	2	1	2	2
FALSE	High	Master Protein	P0DPR9	Melittin-N OS=Apis cerana OX=7461 GN=MELT PE=1 SV=1		0	FALSE	49.84	21	2	61	2	70	7.6	4.72	121.42			4.69		1.94			11.29					13.81							2			1		2			2					2
FALSE	High	Master Protein	A0A093VDD5	Membrane protein OS=Pectobacterium carotovorum subsp. carotovorum OX=555 GN=KP17_00765 PE=3 SV=1		0	FALSE	20.39	14	6	15	2	366	39	8.53			21.97	0		0				1.77									0				4	2		2				1
FALSE	High	Master Protein	A0A088A8H7	Mevalonate kinase OS=Apis mellifera OX=7460 GN=LOC552163 PE=3 SV=1		0	FALSE	4.662	5	1	1	1	382	42.8	7.59						0																				1
FALSE	High	Master Protein	A0A087ZPE3	MFS domain-containing protein OS=Apis mellifera OX=7460 GN=102653922 PE=4 SV=1		0.001	FALSE	3.5	4	1	1	1	568	63.1	7.27			2.04																				1
FALSE	High	Master Protein	A0A087ZX92	MFS domain-containing protein OS=Apis mellifera OX=7460 GN=107965219 PE=4 SV=1		0	FALSE	3.978	3	1	1	1	480	54.1	7.05			3.26																				1
FALSE	High	Master Protein	A0A087ZS22	MFS domain-containing protein OS=Apis mellifera OX=7460 GN=LOC408478 PE=3 SV=1		0	FALSE	23.548	12	5	15	5	545	60.7	9.22			18.84						0		1.8												5						2		1
FALSE	High	Master Protein	A0A087ZS87	MFS domain-containing protein OS=Apis mellifera OX=7460 GN=LOC410566 PE=4 SV=1		0	FALSE	11.661	5	3	9	3	498	55.7	7.83			10.63	0						2.39													3	1						1
FALSE	High	Master Protein	A0A088AUD6	MFS domain-containing protein OS=Apis mellifera OX=7460 GN=LOC410705 PE=4 SV=1		0	FALSE	7.645	4	2	2	2	534	59.8	6.54			2.26																				2
FALSE	High	Master Protein	A0A088A6U6	MFS domain-containing protein OS=Apis mellifera OX=7460 GN=LOC410920 PE=4 SV=1		0	FALSE	15.297	11	5	10	5	508	56.2	8.21			14.56																				5
FALSE	High	Master Protein	A0A088A3V4	MFS domain-containing protein OS=Apis mellifera OX=7460 GN=LOC412056 PE=4 SV=1		0.008	FALSE	2.329	1	1	2	1	543	60.6	8.44			0																				1
FALSE	High	Master Protein	A0A088AMR8	MFS domain-containing protein OS=Apis mellifera OX=7460 GN=LOC412540 PE=4 SV=1		0	FALSE	3.924	4	1	1	1	596	67.4	6.54			0																				1
FALSE	High	Master Protein	A0A088ABY6	MFS domain-containing protein OS=Apis mellifera OX=7460 GN=LOC413575 PE=3 SV=1		0	FALSE	143.051	29	15	339	15	538	58.4	6.55	79.62	2.75	83.07	56.82	3.51	43.05	0	31.35	25.51	43.12	30.75	1.76	84.85	12.63	30.75	238.46	18.92	95.37	20.01	2.76	8	1	8	6	1	6	1	5	4	7	8	2	7	5
FALSE	High	Master Protein	A0A087ZQS9	MFS domain-containing protein OS=Apis mellifera OX=7460 GN=LOC413739 PE=4 SV=1		0.001	FALSE	3.446	2	1	1	1	546	60.6	7.68			2.1																				1
FALSE	High	Master Protein	A0A088AJE0	MFS domain-containing protein OS=Apis mellifera OX=7460 GN=LOC551863 PE=4 SV=1		0	FALSE	4.972	3	3	11	3	477	52.6	8.31								2.21			6.23		6.89			0		4.25		1.85								1			2		2
FALSE	High	Master Protein	A0A088AM86	MFS domain-containing protein OS=Apis mellifera OX=7460 GN=LOC552592 PE=3 SV=1		0	FALSE	5.942	3	1	1	1	514	56.3	9.14			3.17																				1
FALSE	High	Master Protein	A0A088A8N0	MFS domain-containing protein OS=Apis mellifera OX=7460 GN=LOC724874 PE=3 SV=1		0	FALSE	114.065	27	13	537	13	514	57.9	8.72	67.48	41.28	60.09	27.98	26.06	16.4	16.26	64.02	15.66	20.65	86.09	24.14	89.19	10.51	26.27	114.87	130.58	312.94	44.75	15.31	9	5	9	7	2	7	3	6	5	6	8	4	7	5
FALSE	High	Master Protein	A0A087ZWI3	MFS domain-containing protein OS=Apis mellifera OX=7460 GN=Picot PE=4 SV=1		0	FALSE	25.097	9	4	45	4	525	58	7.28	4.69		16.7	2.17	5.32	2.04		4.82	0	6.95	7.58	3.18	5.26	0					2.29	0	3		3	1	1	1		1	1	2	3	1	3	2
FALSE	High	Master Protein	A0A087ZYT1	MFS domain-containing protein OS=Apis mellifera OX=7460 PE=3 SV=1		0	FALSE	13.596	6	2	3	2	460	50.9	7.88			9.76																				2
FALSE	High	Master Protein	A0A088ABY5	MFS domain-containing protein OS=Apis mellifera OX=7460 PE=3 SV=1		0	FALSE	59.668	11	7	47	7	468	50.6	7.06	3.31		17.67	12.12					64.29	6.51	0							3.36			2		3	4					7	4	1
FALSE	High	Master Protein	A0A087ZQD7	MFS domain-containing protein OS=Apis mellifera OX=7460 PE=3 SV=1		0	FALSE	9.266	3	2	9	2	784	87.1	7.34			12.63	0						0	2.76			0									2	1						1	1			1
FALSE	High	Master Protein	A0A087ZPL0	MFS domain-containing protein OS=Apis mellifera OX=7460 PE=3 SV=1		0	FALSE	12.422	6	3	6	3	490	54.6	6.25			12.35																				3
FALSE	High	Master Protein	A0A088AUA9	MFS domain-containing protein OS=Apis mellifera OX=7460 PE=3 SV=1		0	FALSE	15.008	6	3	10	3	521	57.6	8.28			14.46	3.98		0					2.73			0		0							2	2		1					1			1
FALSE	High	Master Protein	A0A087ZQT0	MFS domain-containing protein OS=Apis mellifera OX=7460 PE=4 SV=1		0	FALSE	22.188	13	3	23	3	355	39.8	5.34			32.57	4.98		4.01		2.14		4.38	1.85			3.84	0								3	1		1		1		1	1			2
FALSE	High	Master Protein	A0A088A5U8	MFS domain-containing protein OS=Apis mellifera OX=7460 PE=4 SV=1		0	FALSE	5.298	7	3	4	3	798	86.5	5.78			0						0		0												1						1		2
FALSE	High	Master Protein	A0A087ZPG6	MFS domain-containing protein OS=Apis mellifera OX=7460 PE=4 SV=1		0	FALSE	7.859	9	2	4	2	334	37.8	9.35			8.05																				2
FALSE	High	Master Protein	A0A088A9Q6	MFS_1_like domain-containing protein OS=Apis mellifera OX=7460 GN=Sug PE=4 SV=1		0.001	FALSE	3.461	4	1	2	1	591	66.8	6.93			2.56						0														1						1
FALSE	High	Master Protein	A0A088A9E6	MHD domain-containing protein OS=Apis mellifera OX=7460 GN=AP-50 PE=3 SV=1		0.001	FALSE	3.333	2	1	1	1	442	49.9	9.45			2.41																				1
FALSE	High	Master Protein	A0A087ZV20	MHD domain-containing protein OS=Apis mellifera OX=7460 GN=LOC408391 PE=3 SV=1		0	FALSE	28.122	31	9	18	9	422	48.5	7.18				15.42					0	1.77														8					5	1
FALSE	High	Master Protein	A0A088AG05	MICOS complex subunit MIC13 OS=Apis mellifera OX=7460 GN=725253 PE=3 SV=1		0	FALSE	12.895	33	3	12	3	114	12.9	9.28	3.94		9.53	1.75					4.22		1.68										1		2	1					2		1
FALSE	High	Master Protein	A0A088ASI2	MICOS complex subunit MIC60 OS=Apis mellifera OX=7460 GN=LOC408548 PE=3 SV=1		0	FALSE	99.724	30	20	60	20	752	86.1	7.78	6.27		76.17	1.74		1.64			11.93	3.09	7.82		0	2.03							2		19	2		1			10	3	3		1	1
FALSE	High	Master Protein	A0A088A8C1	MICOS complex subunit OS=Apis mellifera OX=7460 GN=LOC552009 PE=4 SV=1		0	FALSE	39.107	31	6	30	6	245	27.5	8.38	4.58		20.3	0		3.48			7.2	2.16	9.62			1.8							3		4	2		1			4	1	4			1
FALSE	High	Master Protein	A0A088A218	Mitochondrial import inner membrane translocase subunit TIM44 OS=Apis mellifera OX=7460 GN=LOC412409 PE=3 SV=1		0	FALSE	40.581	20	8	47	8	456	52.2	8.44	13.64		27.08			2.23			6.91	3.92	23.62		2.43	4.28							6		5			2			6	2	6		1	4
FALSE	High	Master Protein	A0A088AJ70	Mitochondrial import inner membrane translocase subunit TIM50 OS=Apis mellifera OX=7460 GN=LOC408569 PE=3 SV=1		0	FALSE	32.744	14	6	17	6	387	45.5	6.81	1.96		21.29						0		16.23										2		5						1		5
FALSE	High	Master Protein	A0A088A1R9	Mitochondrial Rho GTPase OS=Apis mellifera OX=7460 PE=3 SV=1		0.002	FALSE	2.753	1	1	1	1	650	74.3	6.68			1.85																				1
FALSE	High	Master Protein	T0L7S7	Mitogen-activated protein kinase kinase 2 OS=Nosema apis BRL 01 OX=1037528 GN=NAPIS_ORF01928 PE=3 SV=1		0.001	FALSE	3.224	4	1	8	1	203	23.7	8.97	1.59				3.49			1.31		1.74	1.77									1.7	1				1			1		1	1
FALSE	High	Master Protein	A0A088AJ01	Mitogen-activated protein kinase OS=Apis mellifera OX=7460 GN=rl PE=4 SV=1		0	FALSE	3.951	4	1	5	1	365	42	6.34			2.28	0					0	0			0										1	1					1	1			1
FALSE	High	Master Protein	A0A087ZVK5	ML domain-containing protein OS=Apis mellifera OX=7460 GN=LOC551922 PE=4 SV=1		0	FALSE	18.409	49	4	24	4	152	17	6.73	0	2.62		0	0		0		0			4.43	2.6				8.05	4.4			2	3		1	1		2		1			3	1
FALSE	High	Master Protein	A0A087ZTA5	ML domain-containing protein OS=Apis mellifera OX=7460 GN=LOC724386 PE=4 SV=1		0	FALSE	78.252	61	5	378	5	148	16.1	7.62	12.29	76.99		9.71	16.03	14.86	48.6	2.2	11.89	16.35	13.96	66.62	9.13	22.78	16.22	2.11	623.94	147.12	2.27	2.13	3	3		4	3	3	3	1	2	3	3	4	2	3
FALSE	High	Master Protein	A0A087ZW48	MoCF_biosynth domain-containing protein OS=Apis mellifera OX=7460 GN=100576660 PE=4 SV=1		0.001	FALSE	3.05	2	1	1	1	451	53.2	8.02											2.24																				1
FALSE	High	Master Protein	A0A088AV56	MOSC domain-containing protein OS=Apis mellifera OX=7460 GN=LOC724919 PE=4 SV=1		0	FALSE	66.102	46	13	62	13	343	38.8	9.19			84.64	13.86	0			3.87	20.48	16.43	2.07			0									13	5	1			3	7	6	1			1
FALSE	High	Master Protein	A0A088AGS6	MPN domain-containing protein OS=Apis mellifera OX=7460 GN=LOC408413 PE=4 SV=1		0.001	FALSE	3.468	5	1	1	1	320	36.4	6.48									0																				1
FALSE	High	Master Protein	A0A088A3I1	MPN domain-containing protein OS=Apis mellifera OX=7460 GN=LOC551620 PE=4 SV=1		0	FALSE	4.14	1	2	2	2	2374	277	8.88									1.62																				2
FALSE	High	Master Protein	A0A088A8N1	MRP-S23 domain-containing protein OS=Apis mellifera OX=7460 PE=4 SV=1		0	FALSE	18.498	36	5	9	5	144	17.2	9.22	0		2.38								15.31										3		1								5
FALSE	High	Master Protein	A0A088A3M3	MRP-S28 domain-containing protein OS=Apis mellifera OX=7460 GN=mRpS35 PE=4 SV=1		0	FALSE	23.994	17	4	10	4	323	37.8	9.32	2.34		8.97							0	8.3										1		2							1	3
FALSE	High	Master Protein	A0A088A1I8	Multifunctional fusion protein OS=Apis mellifera OX=7460 GN=LOC551113 PE=3 SV=1		0	FALSE	17.077	13	6	18	6	567	63.5	8.32		12.7				0				0	0		7.74					1.66				4				1				1	2		4
FALSE	High	Master Protein	A0A093RDD7	Murein lipoprotein OS=Pectobacterium carotovorum subsp. carotovorum OX=555 GN=KP17_02980 PE=4 SV=1		0	FALSE	16.41	33	2	21	1	78	8.4	9.31	2.31		3.04	5.87		6.38			1.67	5.78	5.67			2.84	4.89				10.8		1		1	1		1			1	1	1			1
FALSE	High	Master Protein	A0A080UXV1	Murein-lipoprotein OS=Serratia marcescens OX=615 GN=lpp PE=4 SV=1		0	FALSE	18.73	33	2	29	1	78	8.3	8.84	2.31		3.04	8.84		13.98			1.67	5.78	8.64			8.04	4.89				10.24		1		1	2		2			1	1	2			2
FALSE	High	Master Protein	A0A088AJT3	Myb_DNA-bind_5 domain-containing protein OS=Apis mellifera OX=7460 PE=4 SV=1		0	FALSE	14.182	4	1	6	1	439	50.8	8.29									12.59	4.17	3.03																		1	1	1
FALSE	High	Master Protein	A0A088AJE3	Myosin motor domain-containing protein OS=Apis mellifera OX=7460 PE=3 SV=1		0	FALSE	865.374	54	115	528	115	1967	226.4	5.55	9.06		1088.18	137.25	6.25	4.82		4.09	36.26	103.55	2.33			2.15		12.17					8		112	46	3	3		3	24	31	2			1
FALSE	High	Master Protein	A0A087ZW19	Myosin_tail_1 domain-containing protein OS=Apis mellifera OX=7460 PE=4 SV=1		0	FALSE	206.866	53	30	122	30	541	63.5	5.36	17.89		218.66	8.98	2.21			0	3.31	38.29									0		8		27	8	1			1	5	12
FALSE	High	Master Protein	A0A087ZW20	Myosin_tail_1 domain-containing protein OS=Apis mellifera OX=7460 PE=4 SV=1		0	FALSE	130.314	25	16	55	16	639	74.5	7.23	12.27		132.61	15.81					2.4	10.32						0					6		16	6					1	3
FALSE	High	Master Protein	A0A088ATG2	Na_H_Exchanger domain-containing protein OS=Apis mellifera OX=7460 PE=4 SV=1		0	FALSE	11.999	11	4	4	4	496	53.8	7.09			8.23																0				3
FALSE	High	Master Protein	A0A088AUC4	NAC-A/B domain-containing protein OS=Apis mellifera OX=7460 GN=LOC551157 PE=4 SV=1		0	FALSE	27.557	18	3	23	3	214	22.7	4.81	1.98		5.99	22.29						8.86	0										3		3	3						3	1
FALSE	High	Master Protein	A0A0B4J2M4	N-acetylglucosamine-6-phosphate deacetylase OS=Apis mellifera OX=7460 PE=3 SV=1		0	FALSE	7.011	4	1	1	1	405	44.5	7.69			3.58																				1
FALSE	High	Master Protein	A0A088ADJ5	NAD(P)H-hydrate epimerase OS=Apis mellifera OX=7460 GN=LOC727471 PE=3 SV=1		0	FALSE	8.595	12	2	5	2	234	26.5	7.33		4.7											5.39									1											2
FALSE	High	Master Protein	A0A087ZP22	NADH dehydrogenase [ubiquinone] 1 alpha subcomplex subunit 10, mitochondrial OS=Apis mellifera OX=7460 GN=Ndufa10 PE=3 SV=1		0	FALSE	64.002	41	14	74	14	415	49.2	7.11	13.66		41.82	6.5		1.86			19.04	4.96	32.09		0	1.67		1.64					8		10	3		5			9	4	9		1	2
FALSE	High	Master Protein	A0A087ZQU2	NADH dehydrogenase [ubiquinone] 1 alpha subcomplex subunit 8 OS=Apis mellifera OX=7460 GN=Ndufa8 PE=3 SV=1		0	FALSE	52.396	52	9	80	9	174	20.2	8.05	4.46	2.51	33.03		11.72	0		14.64	14.89	3.12	11.63		23.01	2.07	2.65			6.12	0		2	1	6		3	2		6	4	3	3		5	2
FALSE	High	Master Protein	A0A088A1P8	NADH dehydrogenase [ubiquinone] flavoprotein 1, mitochondrial OS=Apis mellifera OX=7460 PE=3 SV=1		0	FALSE	100.456	59	19	114	19	469	51.5	8.34	18.42		92.8	13.41		9.66		1.85	30.41	9.99	32.73		0	0							8		17	6		5		1	15	5	8		1	3
FALSE	High	Master Protein	A0A343TB61	NADH dehydrogenase subunit 2 OS=Apis mellifera capensis OX=293692 GN=ND2 PE=4 SV=1		0	FALSE	6.857	7	2	3	2	333	40.9	9.58	1.67		4.18																		1		2
FALSE	High	Master Protein	A0A343TBC0	NADH dehydrogenase subunit 5 OS=Apis mellifera capensis OX=293692 GN=ND5 PE=4 SV=1		0.001	FALSE	3.107	2	1	3	1	554	65.5	9.13	0										2.21			0							1										1			1
FALSE	High	Master Protein	A0A0S2LSJ1	NADH dehydrogenase subunit 6 OS=Apis mellifera OX=7460 GN=ND6 PE=4 SV=1		0.003	FALSE	2.685	6	1	3	1	167	20	9.73	0								1.74					0							1								1					1
FALSE	High	Master Protein	A0A088AB11	NADH-cytochrome b5 reductase OS=Apis mellifera OX=7460 GN=LOC413189 PE=3 SV=1		0	FALSE	64.549	41	11	66	11	308	34.6	8.9		4.46	60.91	4.28	4.14	1.89		6.85	7.63	4.55	2.81		9.16	2.05	1.73			21.94				2	10	5	3	1		4	6	5	1		3	1
FALSE	High	Master Protein	A0A060B9T4	NADH-ubiquinone oxidoreductase chain 1 OS=Apis mellifera scutellata OX=212527 GN=ND1 PE=3 SV=1		0	FALSE	6.864	5	1	3	1	305	36.7	6.54			7.63																				1
FALSE	High	Master Protein	A0A0B5HAU7	NADH-ubiquinone oxidoreductase chain 3 OS=Apis mellifera syriaca OX=279977 GN=ND3 PE=3 SV=1		0	FALSE	7.559	11	1	11	1	117	14	8.1	2.32		10.1	0					2.5		2.62										1		1	1					1		1
FALSE	High	Master Protein	V5T6Q6	NADPH-dependent FMN reductase OS=Lactobacillus kimbladii OX=1218506 GN=JF75_02910 PE=4 SV=1		0	FALSE	3.646	24	2	2	2	182	20	5.15								3.84																				2
FALSE	High	Master Protein	A0A088AD09	Ncstrn_small domain-containing protein OS=Apis mellifera OX=7460 GN=nct PE=4 SV=1		0	FALSE	40.868	20	9	36	9	642	72.1	6.04	0		11.78		16.51			4.64			6.38		27.06		0			4.62			2		2		4			2			5		7
FALSE	High	Master Protein	A0A087ZNN2	Neutral ceramidase OS=Apis mellifera OX=7460 PE=3 SV=1		0	FALSE	45.841	33	8	46	8	359	40.2	5.9	4.08	7.53	20.43		1.68	1.71	2.28	13.72			12.82		5.53			0	4.17	16.22			4	2	4		1	3	1	7			6		2
FALSE	High	Master Protein	A0A087ZNN1	Neutral ceramidase OS=Apis mellifera OX=7460 PE=3 SV=1		0	FALSE	46.939	35	10	41	10	349	38.6	7.58	4.43	2.79	22.73		0	3.98	2.72	17.56			12.71		12.3	0			7.13	8.45			3	1	8		1	2	1	6			2		3	1
FALSE	High	Master Protein	A0A088A2E5	Nfu_N domain-containing protein OS=Apis mellifera OX=7460 GN=LOC412366 PE=4 SV=1		0	FALSE	10.166	10	2	5	2	275	31.2	5.44	1.99										4.76										2										2
FALSE	High	Master Protein	A0A087ZYD4	Nicalin OS=Apis mellifera OX=7460 GN=Ncln PE=3 SV=1		0	FALSE	6.152	4	2	4	2	555	62	6.65			4.96	0		0																	2	1		1
FALSE	High	Master Protein	A0A087ZNB4	NIDO domain-containing protein OS=Apis mellifera OX=7460 GN=LOC725498 PE=4 SV=1		0	FALSE	14.407	8	3	61	1	371	42.1	5.2	7.54		19.77	13.3	8.17	7.56		4.49	13.32	13.31	10.35		2.21	9.4	2.28	2.89		1.71			2		2	2	2	2		1	2	2	2		1	2
FALSE	High	Master Protein	A0A088ACJ3	NTF2 domain-containing protein OS=Apis mellifera OX=7460 GN=LOC409406 PE=4 SV=1		0	FALSE	7.589	23	2	10	2	130	14.9	5.78		0	0	2.4					2.48	0			3.39	1.67					0			1	1	1					1	1			1	1
FALSE	High	Master Protein	A0A088AFU3	Nucleolar GTP-binding protein 2 OS=Apis mellifera OX=7460 PE=3 SV=1		0	FALSE	10.659	2	2	6	2	1035	119.3	9.22			6.04								2.34							0					1								1
FALSE	High	Master Protein	A0A088A7S0	Nucleoplasmin domain-containing protein OS=Apis mellifera OX=7460 GN=102655896 PE=4 SV=1		0	FALSE	16.088	20	2	51	2	171	18.8	4.75		15.81			2.98		8.26	4.74				8.04	12.84	0			20.17	52.25				2			1		1	1				1	2	1
FALSE	High	Master Protein	A0A088ATV8	Nucleoside diphosphate kinase OS=Apis mellifera OX=7460 PE=3 SV=1		0	FALSE	56.565	72	11	157	11	154	17.6	7.33	2.25	59.14		7.8	4.7		20.05	2.45	1.76		4.42	31.93	35.88				33.04	101.82			4	8		5	4		5	3	5		2	8	9
FALSE	High	Master Protein	A0A088ABQ5	Nudix hydrolase domain-containing protein OS=Apis mellifera OX=7460 GN=100576795 PE=4 SV=1		0	FALSE	4.732	4	1	4	1	327	37.2	5.73	2.02								0		2.01										1								1		1
FALSE	High	Master Protein	A0A087ZW82	Nudix hydrolase domain-containing protein OS=Apis mellifera OX=7460 GN=102655411 PE=4 SV=1		0	FALSE	7.592	13	3	3	3	246	28.5	9.11	0										2.01										1										2
FALSE	High	Master Protein	A0A088A6N0	Nudix hydrolase domain-containing protein OS=Apis mellifera OX=7460 GN=mRpL46 PE=4 SV=1		0	FALSE	22.069	28	7	31	7	269	31.1	8.59	6.63		5.04	7.68		0			0	3.91	4.73		1.88	0							5		2	5		2			3	2	3		1	1
FALSE	High	Master Protein	A0A088ASQ1	Obg-like ATPase 1 OS=Apis mellifera OX=7460 GN=LOC413266 PE=3 SV=1		0	FALSE	3.729	7	2	2	2	397	44.6	7.78											1.74																				2
FALSE	High	Master Protein	A0A088A4L3	OBP18 OS=Apis mellifera OX=7460 PE=4 SV=1		0	FALSE	6.269	20	2	4	2	149	16.4	4.84	0								0												2								1
FALSE	High	Master Protein	Q1W633	OBP21 OS=Apis mellifera OX=7460 GN=Obp21 PE=2 SV=1		0	FALSE	14.717	34	3	5	3	135	15.2	4.82	6.93													0							3													2
FALSE	High	Master Protein	A0A088A3J5	OCIA domain-containing protein OS=Apis mellifera OX=7460 GN=asrij PE=4 SV=1		0	FALSE	7.011	12	2	10	2	233	27.2	5.12			8.7					0	0		4.67		0										1					1	1		1		1
FALSE	High	Master Protein	A0A088AW16	Oligosaccharyltransferase complex subunit OS=Apis mellifera OX=7460 PE=3 SV=1		0	FALSE	6.985	11	1	3	1	110	13	9.23			4.05						0														1						1
FALSE	High	Master Protein	A0A088AFG9	Ornithine aminotransferase OS=Apis mellifera OX=7460 GN=Oat PE=3 SV=1		0	FALSE	85.545	52	16	86	16	425	47.3	8.29	5.06	6.92	45.33	8.63		19	0		2	2.06	44.65			11.02		7.78	7.75		0		2	3	11	5		10	1		1	1	10			10
FALSE	High	Master Protein	A0A088A9V1	Oxidored_q6 domain-containing protein OS=Apis mellifera OX=7460 GN=Ndufs7 PE=3 SV=1		0	FALSE	34.742	39	7	43	7	223	24.9	9.31	4.74		38.83	4.76		2.34		2.25	11.43	2.57	17.74		4.98	1.8							1		7	1		2		1	5	1	4		1	1
FALSE	High	Master Protein	A0A088ATI3	PABS domain-containing protein OS=Apis mellifera OX=7460 GN=LOC410080 PE=4 SV=1		0	FALSE	5.26	5	2	4	2	366	41.2	5.07									0					0				3.62											1					1
FALSE	High	Master Protein	A0A088AN50	PC4 domain-containing protein OS=Apis mellifera OX=7460 GN=Ssb-c31a PE=4 SV=1		0	FALSE	8.299	26	3	9	3	119	13.8	9.1		1.96		1.85	1.92									2.13				7.66				1		1	1									2
FALSE	High	Master Protein	A0A088ASB8	PCI domain-containing protein OS=Apis mellifera OX=7460 GN=Rpn3 PE=4 SV=1		0	FALSE	4.864	4	2	2	2	495	56.9	8.28				2.01					0															1					1
FALSE	High	Master Protein	A0A088AM61	PCI domain-containing protein OS=Apis mellifera OX=7460 PE=4 SV=1		0	FALSE	7.317	5	2	7	2	455	52.2	6.98	0		6.61	0					4.1		2.04										1		1	1					1		1
FALSE	High	Master Protein	A0A088AUL3	PDGF_2 domain-containing protein OS=Apis mellifera OX=7460 GN=Pvf1 PE=3 SV=1		0.009	FALSE	2.296	5	1	1	1	318	35.9	7.27	0																				1
FALSE	High	Master Protein	A0A088AMU0	PDZ domain-containing protein OS=Apis mellifera OX=7460 GN=HtrA2 PE=4 SV=1		0	FALSE	4.154	4	1	2	1	425	47.5	9.57	1.65										2.25										1										1
FALSE	High	Master Protein	A0A088AUT1	PDZ domain-containing protein OS=Apis mellifera OX=7460 GN=LOC413207 PE=4 SV=1		0	FALSE	17.396	16	3	12	3	260	28.5	6.11	0	10.85			2.89					2.29			3.78					12.76			1	2			1					1			1
FALSE	High	Master Protein	A0A087ZY53	Peptidase A1 domain-containing protein OS=Apis mellifera OX=7460 GN=cathD PE=3 SV=1		0	FALSE	80.452	44	12	139	12	385	42.2	6.32	17.33	46.66	40.53	10.27	13.72	5.95	13.79	3.53	9.87	9.24	29.56		13.27	8.09	4.24	0	2.84	22.09	0	0	8	7	8	4	5	8	3	3	5	5	10		5	6
FALSE	High	Master Protein	A0A088A9M1	Peptidase S1 domain-containing protein OS=Apis mellifera OX=7460 GN=SP22 PE=3 SV=1		0	FALSE	64.214	41	9	302	9	259	28	8.81	20.53	57.66	2.08	17.87	19.51	8.1	26.52	11.27	14.27	2.27	12.19	61.21	27.4	11.37	4.5		194.08	155.25			6	8	1	5	5	4	5	5	6	3	3	7	6	5
FALSE	High	Master Protein	A0A088AGZ8	Peptidase S1 domain-containing protein OS=Apis mellifera OX=7460 GN=SP36 PE=3 SV=1		0	FALSE	145.421	76	11	964	11	263	28.1	7.68	88.65	150.86	36.39	121.41	83.85	78.85	57.73	51.9	111.06	63.48	82.55	116.98	74.17	79.65	24.77	3.3	475.94	496.08	12.05	7.66	10	9	7	10	9	11	5	8	10	8	9	8	8	10
FALSE	High	Master Protein	A0A088AKU3	Peptidase S1 domain-containing protein OS=Apis mellifera OX=7460 GN=SP40 PE=3 SV=1		0	FALSE	16.018	24	5	28	5	255	28.4	6.52	2.11	9.18					4.87		1.8			6.82	9.86	2			12.42	13.35			1	2					1		1			2	4	2
FALSE	High	Master Protein	A0A088A984	Peptidase S1 domain-containing protein OS=Apis mellifera OX=7460 GN=SP44 PE=3 SV=1		0	FALSE	17.627	18	5	24	5	325	36.6	5.96		1.73		3.63		0	2.17	1.64	4.66	0		8					5.85	7.95				1		3		1	1	1	1	1		4
FALSE	High	Master Protein	A0A088A359	Peptidase S1 domain-containing protein OS=Apis mellifera OX=7460 PE=3 SV=1		0.003	FALSE	2.622	3	1	3	1	391	43.7	5.39	0			0						1.65											1			1						1
FALSE	High	Master Protein	A0A087ZN39	Peptidase S1 domain-containing protein OS=Apis mellifera OX=7460 PE=3 SV=1		0	FALSE	84.768	70	13	219	13	268	28.6	8.57	7.44	47.45		33.33	23.81	0	49.36	6.65	26.08	19.82	2.54	25.48	18.47	8.35	5.7		79.37	94.71		0	7	8		10	6	3	7	3	9	5	3	5	4	8
FALSE	High	Master Protein	A0A088AEY3	Peptidase S1 domain-containing protein OS=Apis mellifera OX=7460 PE=3 SV=1		0	FALSE	7.063	15	3	7	3	259	28	6.77									1.88						0		3.28	0											2
FALSE	High	Master Protein	A0A087ZN40	Peptidase S1 domain-containing protein OS=Apis mellifera OX=7460 PE=3 SV=1		0	FALSE	122.262	54	11	1065	11	276	29.4	8.75	91.66	141.57	47.83	129.44	81.91	75.25	95.7	92.14	115.2	64.53	87.9	116.27	88.82	59.78	42.54	23.63	597.73	642.95	196.48	21.24	8	9	7	10	8	9	6	9	9	8	7	7	7	9
FALSE	High	Master Protein	A0A087ZXX0	Peptidase_M14 domain-containing protein OS=Apis mellifera OX=7460 GN=LOC551327 PE=4 SV=1		0	FALSE	22.113	15	5	21	5	425	47.9	6.21		13.04			0		4.75				1.69	3.4	2.04				7.47	12.14				4			1		2				1	2	1
FALSE	High	Master Protein	A0A088AJR6	Peptidase_M28 domain-containing protein OS=Apis mellifera OX=7460 GN=LOC410149 PE=4 SV=1		0	FALSE	53.189	30	11	144	8	479	52.9	5.43	8.59	48.83		13.15	4.5	1.68	13.24	18.1	16.48	5.13		61.35	3.99	5.68			97.96	53.24	0		4	6		3	2	3	4	5	5	2		9	2	3
FALSE	High	Master Protein	A0A088A752	Peptidase_M28 domain-containing protein OS=Apis mellifera OX=7460 PE=4 SV=1		0	FALSE	22.621	31	4	32	1	216	24	5.39		15.86					6.93	2.4				10.58					39.81	12.59				3					2	1				2
FALSE	High	Master Protein	A0A087ZYD9	Peptidase_M28 domain-containing protein OS=Apis mellifera OX=7460 PE=4 SV=1		0	FALSE	54.997	17	12	98	12	882	100.1	8.44	9.25	15.41	13.45	0	9.32	2.4	3.5	14.72			16.03	2.5	24.31	0	4.37		0	46.76			5	6	7	1	3	5	1	8			5	4	7	1
FALSE	High	Master Protein	A0A087ZW90	Peptidase_M3 domain-containing protein OS=Apis mellifera OX=7460 GN=LOC412154 PE=3 SV=1		0	FALSE	23.517	11	6	7	6	755	87.5	8.38			0								9.69												1								6
FALSE	High	Master Protein	A0A087ZUX9	Peptidase_M3 domain-containing protein OS=Apis mellifera OX=7460 PE=3 SV=1		0	FALSE	13.739	8	4	4	4	694	79.8	8.02			2.12								2.03												1								3
FALSE	High	Master Protein	A0A088AHN3	Peptidase_S9 domain-containing protein OS=Apis mellifera OX=7460 PE=4 SV=1		0	FALSE	24.789	15	10	19	10	709	80.8	6.54		8.97	2.76	1.79							0	1.76					14.75					7	1	1							2	2
FALSE	High	Master Protein	A0A088AFK3	Peptide deformylase OS=Apis mellifera OX=7460 GN=102654737 PE=3 SV=1		0	FALSE	6.557	12	3	8	3	233	27.1	6.98			0						0		0		0										2						1		3		2
FALSE	High	Master Protein	A0A086FM61	Peptidoglycan-associated lipoprotein OS=Serratia marcescens OX=615 GN=pal PE=3 SV=1		0	FALSE	7.862	24	3	3	1	169	18.3	7.43						1.62													0							1
FALSE	High	Master Protein	A0A093SWA8	Peptidoglycan-associated outer membrane lipoprotein OS=Pectobacterium carotovorum subsp. carotovorum OX=555 GN=KP17_05985 PE=3 SV=1		0	FALSE	8.017	22	3	3	1	170	18.5	6.79			1.77																0				1
FALSE	High	Master Protein	A0A088A8D4	Peptidyl-prolyl cis-trans isomerase OS=Apis mellifera OX=7460 GN=LOC409890 PE=3 SV=1		0	FALSE	36.326	29	5	51	5	209	22.8	9.14	16.21		2.83	7.46		2.99			10.84	3.15	20.66					0		2.26			4		1	3		2			3	2	5
FALSE	High	Master Protein	A0A088A5R9	Peptidyl-prolyl cis-trans isomerase OS=Apis mellifera OX=7460 PE=3 SV=1		0	FALSE	10.242	17	3	6	3	184	20.1	8.68	2.5		1.86			1.86					2.26								1.62		1		1			1					1
FALSE	High	Master Protein	A0A088ABX3	Peptidylprolyl isomerase OS=Apis mellifera OX=7460 GN=FK506-bp1 PE=4 SV=1		0.001	FALSE	3.485	3	1	2	1	354	40.4	4.89				4.04																				1
FALSE	High	Master Protein	A0A087ZPR8	Peptidylprolyl isomerase OS=Apis mellifera OX=7460 GN=FKBP59 PE=4 SV=1		0	FALSE	5.126	4	2	6	2	459	51.5	5.58		3.74										2.16	2.06					4.74				1										1	1
FALSE	High	Master Protein	A0A088A340	Peptidylprolyl isomerase OS=Apis mellifera OX=7460 PE=4 SV=1		0	FALSE	7.674	32	2	5	2	88	9.6	8.5	3.07												7.49								1												2
FALSE	High	Master Protein	A0A088AAR9	Peptidylprolyl isomerase OS=Apis mellifera OX=7460 PE=4 SV=1		0	FALSE	8.808	18	2	6	2	164	18.4	4.78	0											2.32	7.59								1											1	2
FALSE	High	Master Protein	A0A087ZYL4	Peroxiredoxin OS=Apis mellifera OX=7460 GN=Prx5 PE=3 SV=1		0	FALSE	21.058	35	4	21	4	185	20.2	8.84	5.66					6.7			2.02		14.66			0							2					4			2		4			1
FALSE	High	Master Protein	A0A088ARH8	PfkB domain-containing protein OS=Apis mellifera OX=7460 PE=4 SV=1		0	FALSE	4.348	5	1	1	1	322	35.1	6.98											2.67																				1
FALSE	High	Master Protein	A0A087ZUN9	PH domain-containing protein OS=Apis mellifera OX=7460 PE=4 SV=1		0	FALSE	19.418	6	4	15	4	792	90	6.24			2.2	10.27					3.22	3.04													1	3					4	2
FALSE	High	Master Protein	A0A088A9W3	PHB domain-containing protein OS=Apis mellifera OX=7460 GN=Flo1 PE=3 SV=1		0	FALSE	10.361	6	2	3	2	429	47.5	5.55			8.76																				2
FALSE	High	Master Protein	A0A088AJY9	PHB domain-containing protein OS=Apis mellifera OX=7460 GN=Flo2 PE=3 SV=1		0	FALSE	43.329	27	8	14	8	402	44	5.73			28.29						0														8						1
FALSE	High	Master Protein	A0A088AD80	PHB domain-containing protein OS=Apis mellifera OX=7460 GN=LOC551427 PE=4 SV=1		0	FALSE	4.638	5	1	1	1	324	37.2	6.33			4.19																				1
FALSE	High	Master Protein	A0A088AMB1	PHB domain-containing protein OS=Apis mellifera OX=7460 GN=LOC551944 PE=4 SV=1		0	FALSE	124.751	47	14	188	14	353	39.5	9.06	32.1		144.03	36.18	11.05	12.02		11.72	44.56	35.96	34.66		12.09	6.61	4.58				1.85	2.26	10		14	9	3	5		5	10	8	7		3	5
FALSE	High	Master Protein	A0A087ZYC8	PHB domain-containing protein OS=Apis mellifera OX=7460 PE=4 SV=1		0	FALSE	85.958	53	14	79	14	380	42.7	8.43	47.49		59.11	0	3.02	9.9		15	12.01	2.69	22.72		6.1	2.69	3.22				0		9		12	1	1	6		7	7	1	7		1	1
FALSE	High	Master Protein	A0A088AUZ8	PHB domain-containing protein OS=Apis mellifera OX=7460 PE=4 SV=1		0	FALSE	9.895	11	3	5	3	337	36.8	7.01			1.62															10.19					1
FALSE	High	Master Protein	A0A088AHV4	Phos_pyr_kin domain-containing protein OS=Apis mellifera OX=7460 GN=LOC552663 PE=4 SV=1		0.001	FALSE	3.391	6	2	4	2	296	33.3	6.55									1.82							0													2
FALSE	High	Master Protein	A0A088ASM4	Phosphate carrier OS=Apis mellifera OX=7460 GN=LOC413517 PE=2 SV=1		0	FALSE	118.197	47	19	353	19	354	39.1	9.1	43.38	1.83	205.58	34.13	25.82	20.75		36.1	49.96	33.79	87.36		31.75	13.96	15.3	2.14		1.7	7.59	6.82	12	2	17	10	6	9		10	17	9	12		6	4
FALSE	High	Master Protein	A0A087ZNJ8	Phosphoglycerate kinase OS=Apis mellifera OX=7460 GN=Pgk PE=3 SV=1		0.001	FALSE	3.847	5	2	2	2	415	45	8.12											1.87																				2
FALSE	High	Master Protein	A0A088A4K0	Phosphoglycerate mutase OS=Apis mellifera OX=7460 PE=3 SV=1		0	FALSE	26.535	19	5	18	5	312	35.3	9.35	0			13.12		0			1.74	2.08	5.35			2.21				2.2			2			5		1			2	1	2			2
FALSE	High	Master Protein	I1VC86	Phospholipase A2 OS=Apis mellifera OX=7460 PE=2 SV=1		0	FALSE	36.556	52	8	41	8	167	19	7.39	26.58	2.07		11.81	1.62				10.99	1.67	1.71								0		7	1		5	2				6	2	2
FALSE	High	Master Protein	A0A088AKU6	Phospholipid-transporting ATPase OS=Apis mellifera OX=7460 PE=3 SV=1		0.002	FALSE	2.772	1	1	1	1	1429	161.1	6.83			2.06																				1
FALSE	High	Master Protein	A0A088A245	Phosphomannomutase OS=Apis mellifera OX=7460 GN=LOC550926 PE=3 SV=1		0	FALSE	11.452	17	3	5	3	262	30.4	5.95				7.01					0									3.76						2					1
FALSE	High	Master Protein	A0A088A6W8	Phosphotransferase OS=Apis mellifera OX=7460 PE=3 SV=1		0	FALSE	56.507	34	12	60	12	445	49.6	6.27		9.62	23.4	7.09	13.68	6.23	3.27	2.32		17.9	3.61	4.47	2.01	0	15.69		4.93	10.12				3	8	4	6	2	1	2		7	2	3	3	3
FALSE	High	Master Protein	C4V741	Photolyase/cryptochrome alpha/beta domain-containing protein OS=Nosema ceranae (strain BRL01) OX=578460 GN=NCER_100256 PE=4 SV=1		0.003	FALSE	2.558	3	1	2	1	473	55.9	8.06										0																				1
FALSE	High	Master Protein	A0A088AFG2	PI3K/PI4K domain-containing protein OS=Apis mellifera OX=7460 PE=4 SV=1		0.001	FALSE	3.569	2	1	2	1	466	53.7	7.15			1.9		0																		1		1
FALSE	High	Master Protein	A0A087ZN43	Piezo-type mechanosensitive ion channel component OS=Apis mellifera OX=7460 PE=3 SV=1		0	FALSE	28.903	3	8	21	8	2681	310.5	8.32	0		4.6	0	4.04			2.91	1.9		9.68		2.23					4.25	0		1		3	1	2			2	2		4		1
FALSE	High	Master Protein	A0A088AMH9	PIPK domain-containing protein OS=Apis mellifera OX=7460 GN=LOC409276 PE=4 SV=1		0	FALSE	12.285	7	3	7	3	494	56.7	7.52			2.14	6.42					2.65	3.51													1	3					1	1
FALSE	High	Master Protein	A0A088AD00	PKS_ER domain-containing protein OS=Apis mellifera OX=7460 GN=LOC410167 PE=4 SV=1		0	FALSE	37.159	34	9	37	9	338	36.7	8.02		12.95	18.26	9.56		3.56	2.69	1.67		2.04	0		2.13	1.92	0	0	4.82					4	4	5		4	2	2		1	2		1	2
FALSE	High	Master Protein	A0A088AP84	PKS_ER domain-containing protein OS=Apis mellifera OX=7460 GN=LOC411304 PE=4 SV=1		0	FALSE	5.638	6	2	4	2	388	42.8	9.17	0		1.94						1.69				1.91								1		1						1				1
FALSE	High	Master Protein	A0A088ABQ7	PKS_ER domain-containing protein OS=Apis mellifera OX=7460 GN=LOC552665 PE=4 SV=1		0	FALSE	5.877	5	2	3	2	386	42.6	6.16	2.18										2.08										2										1
FALSE	High	Master Protein	A0A087ZU72	PKS_ER domain-containing protein OS=Apis mellifera OX=7460 PE=3 SV=1		0	FALSE	29.564	21	6	25	6	364	39.8	7.8			8.69	18.48		4.92			2.72	0				7.93									3	6		2			2	1				3
FALSE	High	Master Protein	A0A087ZXT8	PKS_ER domain-containing protein OS=Apis mellifera OX=7460 PE=4 SV=1		0	FALSE	72.131	60	11	62	11	342	38.1	9.04	34.58		26.72	7.78		11.51			15.78	7.5	39.11		3.12	2.04							10		5	3		5			4	3	9		1	2
FALSE	High	Master Protein	A0A088AE44	PLAC domain-containing protein OS=Apis mellifera OX=7460 GN=LOC409970 PE=4 SV=1		0	FALSE	14.794	11	5	20	5	629	70	7.23	0		0	6.77	0	0		2.01	1.82	2.49	0			0							1		1	3	2	1		1	3	2	1			1
FALSE	High	Master Protein	A0A088AP11	PLCXc domain-containing protein OS=Apis mellifera OX=7460 GN=SPH50 PE=4 SV=1		0	FALSE	8.528	7	2	5	2	442	50.6	6.96				4.07					0		0		2.23											2					1		1		1
FALSE	High	Master Protein	A0A088ALS3	PlsC domain-containing protein OS=Apis mellifera OX=7460 PE=4 SV=1		0.001	FALSE	3.386	5	1	1	1	273	31.6	9.55			2.76																				1
FALSE	High	Master Protein	A0A087ZSU4	Plug_translocon domain-containing protein OS=Apis mellifera OX=7460 GN=Sec61alpha PE=3 SV=1		0	FALSE	14.296	11	4	10	4	476	52.4	8.38			4.38			0			0		6.36			0									2			2			1		3			1
FALSE	High	Master Protein	A0A088APU3	Polyketide_cyc domain-containing protein OS=Apis mellifera OX=7460 PE=4 SV=1		0.002	FALSE	2.816	10	1	1	1	166	19.3	8.41			2.04																				1
FALSE	High	Master Protein	A0A088ANK9	Polypeptide N-acetylgalactosaminyltransferase OS=Apis mellifera OX=7460 GN=GalNAc-T2 PE=3 SV=1		0	FALSE	5.61	4	2	4	2	581	67.5	7.93	1.96					0					4.97										1					1					2
FALSE	High	Master Protein	A0A088AEG6	Polypeptide N-acetylgalactosaminyltransferase OS=Apis mellifera OX=7460 PE=3 SV=1		0	FALSE	16.593	10	4	4	4	635	71.5	7.94											2.61							7.05													1
FALSE	High	Master Protein	A0A221FXS8	Porin OmpA OS=Serratia marcescens OX=615 GN=BVG93_05580 PE=3 SV=1		0	FALSE	20.31	14	6	16	2	359	38.3	8.24			15.28	1.84		1.71				4.2									0				3	2		3				2
FALSE	High	Master Protein	A0A088AUX7	PRA1 family protein OS=Apis mellifera OX=7460 GN=LOC410130 PE=3 SV=1		0	FALSE	6.344	9	2	4	2	196	22.4	9.22			5.99						0														2						1
FALSE	High	Master Protein	A0A088AD29	Prenylcys_lyase domain-containing protein OS=Apis mellifera OX=7460 PE=4 SV=1		0	FALSE	36.535	23	10	29	10	486	55.5	8.41	5.73	2.36	2.26			1.73		4.34			6.05		8.78				7.88	13.35			4	1	1			2		3			3		3
FALSE	High	Master Protein	A0A088AR33	Pribosyltran domain-containing protein OS=Apis mellifera OX=7460 GN=Aprt PE=3 SV=1		0.004	FALSE	2.497	11	1	1	1	178	20	6.05						0																				1
FALSE	High	Master Protein	A0A088AJA4	Probable methylthioribulose-1-phosphate dehydratase OS=Apis mellifera OX=7460 GN=LOC552014 PE=3 SV=1		0	FALSE	42.779	48	9	72	9	225	26	6.93	7.02	0		2.63		30.68		16.86	8.9	0	6.86		8.7	15.93	4.91	4.52		7.54	0		3	1		1		8		5	4	2	4		4	6
FALSE	High	Master Protein	A0A087EQL3	Probable phosphoketolase OS=Lactobacillus kunkeei OX=148814 GN=JI66_01655 PE=3 SV=1		0	FALSE	14.714	8	5	10	5	796	90.1	5.14		12.11					2.78															5					2
FALSE	High	Master Protein	A0A087ZNT2	Profilin OS=Apis mellifera OX=7460 GN=PRF PE=3 SV=1		0	FALSE	34.493	73	6	43	6	126	13.8	5.92	7.08		5.67	2.88		0		1.78	2.17	3.84	24.29				0	0		19.52	0		5		3	3		3		2	4	3	6
FALSE	High	Master Protein	A0A088AGQ1	Prohibitin OS=Apis mellifera OX=7460 GN=LOC408412 PE=3 SV=1		0	FALSE	133.511	81	16	246	16	271	30	7.06	40.12		201.08	36.58	12.12	19.39		22.84	48.05	37.53	49.28		13.82	6.79	19.04	0			8.38	0	11		16	11	6	7		7	10	9	9		5	5
FALSE	High	Master Protein	Q86MV4	Prophenoloxidase OS=Apis mellifera OX=7460 GN=PPO PE=2 SV=2		0	FALSE	6.531	3	2	11	2	693	80	6.76				3.65		0			0	1.92				0										2		1			1	2				1
FALSE	High	Master Protein	A0A088AP51	PRORP domain-containing protein OS=Apis mellifera OX=7460 PE=4 SV=1		0.003	FALSE	2.577	8	1	1	1	248	29.7	9.01			0																				1
FALSE	High	Master Protein	A0A088A859	Proteasome endopeptidase complex OS=Apis mellifera OX=7460 GN=Pros29 PE=3 SV=1		0	FALSE	23.363	10	4	10	4	622	70.8	6.24											0							31.51													1
FALSE	High	Master Protein	A0A088A379	Proteasome subunit alpha type OS=Apis mellifera OX=7460 GN=LOC410095 PE=3 SV=1		0	FALSE	23.252	26	5	17	5	249	28.1	8.46		5.31		1.61								0	5.05				1.65	25.57				2		1								1	1
FALSE	High	Master Protein	A0A088ATC7	Proteasome subunit alpha type OS=Apis mellifera OX=7460 GN=LOC552654 PE=3 SV=1		0	FALSE	32.452	33	8	23	8	276	30.9	6.18		5.01										2.25	1.65				5.49	33.97				2										1	1
FALSE	High	Master Protein	A0A088AQ82	Proteasome subunit alpha type OS=Apis mellifera OX=7460 GN=Pros25 PE=3 SV=1		0	FALSE	5.612	4	1	2	1	234	25.8	7.36																		4.46
FALSE	High	Master Protein	A0A087ZZN8	Proteasome subunit alpha type OS=Apis mellifera OX=7460 GN=Prosalpha5 PE=3 SV=1		0	FALSE	16.462	24	4	8	4	242	26.7	4.92		6.15																17.41				1
FALSE	High	Master Protein	A0A088AP06	Proteasome subunit alpha type OS=Apis mellifera OX=7460 GN=Prosalpha7 PE=3 SV=1		0	FALSE	27.93	33	7	15	7	254	27.9	6.09		6.69											3					26.87				3											1
FALSE	High	Master Protein	A0A088A1E9	Proteasome subunit beta OS=Apis mellifera OX=7460 GN=LOC408353 PE=3 SV=1		0	FALSE	17.557	17	4	16	4	277	30.3	7.42		2.7																48.98				1
FALSE	High	Master Protein	A0A087ZWB2	Proteasome subunit beta OS=Apis mellifera OX=7460 GN=LOC409978 PE=3 SV=1		0	FALSE	8.038	10	2	16	2	207	23.6	6.92	0			1.72		0							2.41				2.32	14.31			1			1		1							1
FALSE	High	Master Protein	A0A087ZZ62	Proteasome subunit beta OS=Apis mellifera OX=7460 GN=LOC411206 PE=3 SV=1		0	FALSE	16.146	18	3	5	3	282	31.6	7.5		1.86															0	9.81				1
FALSE	High	Master Protein	A0A088AM79	Proteasome subunit beta OS=Apis mellifera OX=7460 GN=LOC411520 PE=3 SV=1		0	FALSE	5.975	12	3	5	3	267	30	7.84		1.74																6.09				1
FALSE	High	Master Protein	A0A088AMG0	Proteasome subunit beta OS=Apis mellifera OX=7460 GN=LOC552579 PE=3 SV=1		0	FALSE	5.24	6	1	3	1	205	23	5.25		2.43		1.99									3.31									1		1									1
FALSE	High	Master Protein	A0A087ZMT8	PROTEASOME_ALPHA_1 domain-containing protein OS=Apis mellifera OX=7460 PE=4 SV=1		0	FALSE	3.687	11	1	4	1	119	13.1	6.79		2.56																7.89				1
FALSE	High	Master Protein	A0A088A7Y2	Protein disulfide-isomerase OS=Apis mellifera OX=7460 GN=ERp60 PE=3 SV=1		0	FALSE	62.32	40	16	66	16	490	55.8	5.77	19.07		2.35	8.78		20.52			7.31	0	26.09							1.6			10		2	6		11			3	1	8
FALSE	High	Master Protein	A0A088A7L2	Protein disulfide-isomerase OS=Apis mellifera OX=7460 PE=3 SV=1		0	FALSE	41.945	29	12	54	12	496	56.2	5.12	12.09		8	8.13		14.07			3.32	0	9.76		2.08	0		0			0		6		4	5		11			2	1	6		2	2
FALSE	High	Master Protein	A0A087ZW71	Protein kinase domain-containing protein OS=Apis mellifera OX=7460 GN=CkIIalpha PE=3 SV=1		0	FALSE	10.112	6	3	11	3	468	55.6	8.56			2.39	2.32	0				0	1.67			0		1.81								1	3	1				1	1			1
FALSE	High	Master Protein	A0A088AFE4	Protein kinase domain-containing protein OS=Apis mellifera OX=7460 GN=Csnk1a1 PE=3 SV=1		0	FALSE	12.677	9	3	16	3	350	40.3	9.51	1.94		4.46	5.08	2.11	0			4.73	3.2	2.08										1		2	3	1	1			2	2	1
FALSE	High	Master Protein	A0A088A362	Protein kinase domain-containing protein OS=Apis mellifera OX=7460 GN=LOC408866 PE=4 SV=1		0	FALSE	7.336	3	1	2	1	522	59.7	9.13			2.89						0														1						1
FALSE	High	Master Protein	A0A088AP50	Protein kinase domain-containing protein OS=Apis mellifera OX=7460 PE=4 SV=1		0	FALSE	13.251	9	3	5	3	512	58.4	9.06			7.34																				3
FALSE	High	Master Protein	A0A088ACJ9	Protein RER1 OS=Apis mellifera OX=7460 GN=LOC410094 PE=3 SV=1		0.001	FALSE	3.214	7	2	2	2	197	23.6	8.82			1.83																				2
FALSE	High	Master Protein	A0A088APZ1	Protein transport protein Sec61 subunit beta OS=Apis mellifera OX=7460 GN=Sec61beta PE=3 SV=1		0	FALSE	6.746	27	1	3	1	94	10	11																	2.65	9.48
FALSE	High	Master Protein	A0A088AA34	Protein-serine/threonine kinase OS=Apis mellifera OX=7460 GN=Pdk PE=3 SV=1		0	FALSE	23.016	23	6	15	6	416	47.6	8	2.75		4.44			0					15.87										4		2			1					5
FALSE	High	Master Protein	A0A088AVM2	Protein-tyrosine sulfotransferase OS=Apis mellifera OX=7460 GN=Tango13 PE=3 SV=1		0	FALSE	7.009	7	2	2	2	380	43.1	8.85			3.98																				2
FALSE	High	Master Protein	A0A087ZXB2	Protoporphyrinogen oxidase OS=Apis mellifera OX=7460 GN=Ppox PE=3 SV=1		0	FALSE	51.249	31	11	28	11	477	53.3	9	11.68		10.64	2.44		4.25			0	3.87	27.21										5		5	1		2			1	1	10
FALSE	High	Master Protein	A0A088AP40	P-type domain-containing protein OS=Apis mellifera OX=7460 PE=3 SV=1		0.004	FALSE	2.513	2	1	1	1	907	105.2	7.52																		0
FALSE	High	Master Protein	A0A087ZR59	PUA domain-containing protein OS=Apis mellifera OX=7460 GN=LOC413805 PE=4 SV=1		0.008	FALSE	2.321	2	1	1	1	517	58.5	9.1																0
FALSE	High	Master Protein	A0A222LPT2	Putative cyclin-dependent serine/threonine-protein kinase OS=Apis mellifera OX=7460 PE=2 SV=1		0	FALSE	13.531	3	4	14	4	1511	175.7	5.25	5.64		2.16	2.46		3.51				2.97	0			1.76							2		1	1		3				2	2			2
FALSE	High	Master Protein	M9T1J1	Putative elongation factor Tu (Fragment) OS=Lactobacillus apis OX=303541 GN=tuf PE=4 SV=1		0	FALSE	15.208	28	5	10	4	246	27.1	4.89			4.27					7.28											1.67				2					4
FALSE	High	Master Protein	A0A088A8F0	Putative H3K9 methyltransferase OS=Apis mellifera OX=7460 PE=4 SV=1		0	FALSE	16.745	5	4	17	4	1026	115.7	8.27	2.05			8.48		3.71		1.62	3.3	2.4	2.56		2.42	0							1			4		1		1	2	1	1		1	1
FALSE	High	Master Protein	A0A088AUI8	PWWP domain-containing protein OS=Apis mellifera OX=7460 PE=4 SV=1		0	FALSE	3.993	5	1	1	1	303	34	9.48				0																				1
FALSE	High	Master Protein	A0A088AL66	PX domain-containing protein OS=Apis mellifera OX=7460 PE=4 SV=1		0.001	FALSE	2.997	2	1	3	1	510	57.7	5.27						0			1.83																	1			1
FALSE	High	Master Protein	A0A088AC70	Pyr_redox_2 domain-containing protein OS=Apis mellifera OX=7460 PE=4 SV=1		0	FALSE	114.787	51	19	111	19	469	53.3	9.1	51.55		57.07	4.08		12.1		12.22	11.5	1.77	32.13	0	4.06	3.84	2.83				0		15		13	2		9		6	8	1	9	1	2	5
FALSE	High	Master Protein	A0A088A902	Pyrroline-5-carboxylate reductase OS=Apis mellifera OX=7460 GN=LOC408859 PE=3 SV=1		0.001	FALSE	3.201	5	1	1	1	270	28.5	8.12			2.76																				1
FALSE	High	Master Protein	A0A087ZNH6	Pyruvate carboxylase OS=Apis mellifera OX=7460 GN=LOC412876 PE=4 SV=1		0	FALSE	86.261	21	18	46	18	1196	131.8	6.99	6.56		27.76			1.82			2.26		25.44			1.94		1.99					4		10			3			5		13			1
FALSE	High	Master Protein	A0A0G3SPY1	Pyruvate dehydrogenase E1 component OS=Serratia marcescens OX=615 GN=aceE_3 PE=4 SV=1		0.002	FALSE	2.976	1	1	2	1	887	99.5	5.69			1.76																				1
FALSE	High	Master Protein	A0A088AA89	Pyruvate dehydrogenase E1 component subunit alpha OS=Apis mellifera OX=7460 GN=LOC551103 PE=4 SV=1		0	FALSE	118.202	52	19	116	19	402	44.5	7.88	51.74		52.75			23.91			9.66	2.43	101.82			0		1.62					14		9			11			5	1	17			1
FALSE	High	Master Protein	A0A088AUU5	Pyruvate dehydrogenase E1 component subunit beta OS=Apis mellifera OX=7460 PE=4 SV=1		0	FALSE	97.391	55	12	94	12	335	36.3	5.44	56.03		22.55	4.72		26.65			5.7	2.99	86.81		2.71	2.7		13.72					9		3	2		8			2	1	12		1	2
FALSE	High	Master Protein	A0A088A5I8	Pyruvate kinase OS=Apis mellifera OX=7460 PE=3 SV=1		0	FALSE	73.517	37	15	74	15	609	66.5	7.31	2.04		36.71	22.6		18.17			6.15	10.09	21.72			6.4		1.7					1		11	7		7			7	5	9			5
FALSE	High	Master Protein	A0A087EQW1	Pyruvate kinase OS=Lactobacillus kunkeei OX=148814 GN=JI66_00890 PE=3 SV=1		0	FALSE	7.543	5	2	2	2	586	63	5.19		4.68																				2
FALSE	High	Master Protein	V5T8W4	Pyruvate/2-oxoglutarate dehydrogenase complex dehydrogenase component OS=Lactobacillus mellis OX=1218508 PE=4 SV=1		0	FALSE	6.446	14	2	2	2	336	36.9	5.15								0																				2
FALSE	High	Master Protein	A0A087ZVJ8	RDD domain-containing protein OS=Apis mellifera OX=7460 GN=LOC409005 PE=4 SV=1		0	FALSE	6.841	10	1	7	1	311	35.6	6.05		3.6	2.78					2.48			2.79	0	6.46									1	1					1			1	1	1
FALSE	High	Master Protein	A0A087ZTL5	Receptor expression-enhancing protein OS=Apis mellifera OX=7460 GN=LOC551678 PE=3 SV=1		0	FALSE	10.406	17	2	5	2	178	20.8	8.28			5.01			1.85			0		3.01												1			1			1		1
FALSE	High	Master Protein	A0A087ZVF3	Reticulon-like protein OS=Apis mellifera OX=7460 GN=102656074 PE=4 SV=1		0	FALSE	21.549	26	3	16	3	210	23.4	8.25	5.55		21.62			1.9			4.82		5.45			0					0		1		3			1			2		1			1
FALSE	High	Master Protein	A0A087ZYK5	RF_PROK_I domain-containing protein OS=Apis mellifera OX=7460 GN=LOC410376 PE=4 SV=1		0	FALSE	8.192	13	2	4	2	198	23	9.86			4.71								4.42												1								2
FALSE	High	Master Protein	Q38SD4	Rh-like protein OS=Apis mellifera OX=7460 PE=2 SV=1		0.001	FALSE	3.014	3	1	2	1	471	51.5	6.58		1.68																				1
FALSE	High	Master Protein	A0A088ARF3	Ribokinase OS=Apis mellifera OX=7460 GN=LOC551282 PE=3 SV=1		0	FALSE	12.204	17	5	6	5	308	33.5	8.06		6.6																4.07				3
FALSE	High	Master Protein	A0A088AQW4	Ribonucloprotein OS=Apis mellifera OX=7460 GN=102655272 PE=3 SV=1		0.001	FALSE	3.858	9	1	1	1	127	13.9	7.85									1.7																				1
FALSE	High	Master Protein	A0A088AFB1	Ribos_L4_asso_C domain-containing protein OS=Apis mellifera OX=7460 GN=RpL4 PE=4 SV=1		0	FALSE	4.677	3	2	9	2	429	48.3	11.53	0		0	0		0				1.97	2.05			2.05							1		1	1		1				2	1			2
FALSE	High	Master Protein	A0A087ZZ05	Ribosomal protein L15 OS=Apis mellifera OX=7460 GN=RpL15 PE=3 SV=1		0	FALSE	7.514	18	4	6	4	204	23.9	11.6			2.86					0						0	3.67								2					1						1
FALSE	High	Master Protein	A0A088AA42	Ribosomal_L16 domain-containing protein OS=Apis mellifera OX=7460 GN=mRpL16 PE=4 SV=1		0	FALSE	11.733	20	5	6	5	240	28.1	10.02			4.13								4.12												2								4
FALSE	High	Master Protein	A0A088AL09	Ribosomal_L18_c domain-containing protein OS=Apis mellifera OX=7460 GN=RpL5 PE=3 SV=1		0	FALSE	7.874	6	1	3	1	298	34.3	9.69			5.07						2.12														1						1
FALSE	High	Master Protein	A0A088A2E6	Ribosomal_L18e/L15P domain-containing protein OS=Apis mellifera OX=7460 GN=mRpL15 PE=3 SV=1		0	FALSE	13.859	18	3	5	3	293	33.7	9.07			3.48								8.13												2								3
FALSE	High	Master Protein	A0A088AIL2	Ribosomal_L18e/L15P domain-containing protein OS=Apis mellifera OX=7460 GN=RpL27A PE=3 SV=1		0	FALSE	9.225	13	2	5	2	147	16.7	10.54			0			0				0	0												1			1				2	1
FALSE	High	Master Protein	A0A088AGE9	Ribosomal_L2_C domain-containing protein OS=Apis mellifera OX=7460 GN=mRpL2 PE=4 SV=1		0	FALSE	8.855	11	2	3	2	310	34.5	10.02	0										3.91										1										2
FALSE	High	Master Protein	A0A088AW92	Ribosomal_L30 domain-containing protein OS=Apis mellifera OX=7460 GN=mRpL30 PE=4 SV=1		0	FALSE	7.557	20	3	3	3	177	20.7	9.8											4.61																				3
FALSE	High	Master Protein	A0A088A8Q3	Ribosomal_L6e_N domain-containing protein OS=Apis mellifera OX=7460 GN=RpL6 PE=4 SV=1		0	FALSE	31.326	19	4	22	4	274	31.8	10.48	0		28.02	2.61	2.2	2.54			3.23	5.94	3.55				0						1		3	1	1	1			1	2	1
FALSE	High	Master Protein	A0A088AHA4	Ribosomal_L7Ae domain-containing protein OS=Apis mellifera OX=7460 GN=RpL30 PE=3 SV=1		0.001	FALSE	3.91	11	1	1	1	114	12.5	9.83			3.21																				1
FALSE	High	Master Protein	A0A088A266	Ribosomal_L7Ae domain-containing protein OS=Apis mellifera OX=7460 GN=RpL7A PE=4 SV=1		0	FALSE	8.687	10	2	2	2	268	30.4	10.61			5.16																				2
FALSE	High	Master Protein	A0A088AB54	RIBOSOMAL_L9 domain-containing protein OS=Apis mellifera OX=7460 GN=LOC725866 PE=4 SV=1		0	FALSE	11.811	21	5	6	5	271	31.9	9.47	0										5.37										1										5
FALSE	High	Master Protein	A0A087ZVW5	Ribosomal_S10 domain-containing protein OS=Apis mellifera OX=7460 GN=LOC409129 PE=4 SV=1		0	FALSE	4.937	7	1	1	1	214	24.7	7.61	1.73																				1
FALSE	High	Master Protein	A0A087ZP66	Ribosomal_S10 domain-containing protein OS=Apis mellifera OX=7460 GN=mRpL48 PE=4 SV=1		0	FALSE	11.613	30	3	14	3	175	20.7	9.06	2.31		6.08	4.63		0			2.28	0	9.35										2		1	1		1			1	1	3
FALSE	High	Master Protein	A0A087ZP70	Ribosomal_S10 domain-containing protein OS=Apis mellifera OX=7460 GN=RpS20 PE=3 SV=1		0	FALSE	16.081	23	2	16	2	121	13.7	9.94			2.27	3.88		0			2	1.83	8.47												1	2		1			2	2	2
FALSE	High	Master Protein	A0A087ZQ43	Ribosomal_S13_N domain-containing protein OS=Apis mellifera OX=7460 GN=RpS13 PE=3 SV=1		0	FALSE	19.252	25	3	45	3	151	17.2	10.36	1.8		21.04	7.72		4.21		0	8.01	16.13	4.05				0						1		3	3		2		1	3	3	2
FALSE	High	Master Protein	A0A088AEQ9	Ribosomal_S7 domain-containing protein OS=Apis mellifera OX=7460 GN=mRpS7 PE=3 SV=1		0	FALSE	11.065	20	4	8	4	227	26.8	9.69	1.89		0								11.14										1		1								4
FALSE	High	Master Protein	A0A088A389	Ribosomal_S7 domain-containing protein OS=Apis mellifera OX=7460 GN=RpS5a PE=3 SV=1		0	FALSE	25.149	22	6	36	6	216	24.1	9.45	2.2		7.2	10.14	2.16	5.32		0	6.08	5.53	5.81			0	0						2		4	3	1	2		1	4	3	2			1
FALSE	High	Master Protein	A0A088ACS4	Rieske domain-containing protein OS=Apis mellifera OX=7460 PE=4 SV=1		0	FALSE	21.448	11	5	9	5	586	65.6	7.55		2.87			3.22			2.89			3.34		3.93					5.41				1			2			1			1		1
FALSE	High	Master Protein	A0A088A2T3	RING-CH-type domain-containing protein OS=Apis mellifera OX=7460 PE=4 SV=1		0	FALSE	8.835	6	2	5	2	397	44.3	7.58	2.08		4.76								2.21										2		1								1
FALSE	High	Master Protein	A0A088AHH3	RING-type domain-containing protein OS=Apis mellifera OX=7460 GN=LOC408283 PE=4 SV=1		0.003	FALSE	2.6	2	1	1	1	448	50.4	6.07																		2.18
FALSE	High	Master Protein	A0A088AKU2	RING-type domain-containing protein OS=Apis mellifera OX=7460 PE=4 SV=1		0	FALSE	18.879	9	3	19	3	339	39.8	6.51	2.43		0	9.97		8.12			10.5	2.56			0								1		1	2		1			2	2			1
FALSE	High	Master Protein	A0A088ANL1	RNase III domain-containing protein OS=Apis mellifera OX=7460 GN=mRpL44 PE=4 SV=1		0	FALSE	19.873	18	3	11	3	313	35.6	8.72			17.3			0				0	5.02												3			1				1	2
FALSE	High	Master Protein	A0A088AIM4	RPN2_C domain-containing protein OS=Apis mellifera OX=7460 PE=4 SV=1		0	FALSE	3.699	4	1	2	1	364	40.8	6.33				2.3					2.18															1					1
FALSE	High	Master Protein	A0A087ZSJ5	RuvB-like helicase OS=Apis mellifera OX=7460 GN=pontin PE=3 SV=1		0.001	FALSE	3.896	4	1	6	1	456	50	6.76	0		2.14	0						0	0										1		1	1						1	1
FALSE	High	Master Protein	A0A088AB73	S1 motif domain-containing protein OS=Apis mellifera OX=7460 PE=4 SV=1		0	FALSE	35.79	16	9	15	9	747	83.8	8.65	1.61		13.65						1.78		11.46										2		5						1		5
FALSE	High	Master Protein	A0A088AHT2	S10_plectin domain-containing protein OS=Apis mellifera OX=7460 GN=LOC409552 PE=4 SV=1		0	FALSE	11.744	24	3	5	3	159	17.9	9.83	0		3.73						0		5.98										1		1						1		2
FALSE	High	Master Protein	A0A088A1C1	S4 RNA-binding domain-containing protein OS=Apis mellifera OX=7460 GN=LOC410341 PE=4 SV=1		0.002	FALSE	2.965	3	2	2	2	535	61.1	8.13											5.07																				2
FALSE	High	Master Protein	A0A088AC67	S4 RNA-binding domain-containing protein OS=Apis mellifera OX=7460 GN=RpS9 PE=3 SV=1		0	FALSE	18.927	30	8	18	8	193	22.5	10.74			18.54	1.63						4.9	9.34												7	1						3	4
FALSE	High	Master Protein	A0A087ZQV2	S5 DRBM domain-containing protein OS=Apis mellifera OX=7460 GN=RpS2 PE=3 SV=1		0	FALSE	19.931	29	7	19	7	280	30.3	10.13	0		6.77	3.71					2.16	3.71	2.25					0					1		4	2					4	3	2
FALSE	High	Master Protein	A0A088AL97	Sacchrp_dh_NADP domain-containing protein OS=Apis mellifera OX=7460 PE=4 SV=1		0	FALSE	22.441	20	6	11	6	422	47.4	8.37			12.61	0		0			1.72	2.08	0												5	2		1			1	1	1
FALSE	High	Master Protein	A0A088A6Q5	SAM_MT_RSMB_NOP domain-containing protein OS=Apis mellifera OX=7460 GN=102655259 PE=3 SV=1		0	FALSE	4.316	2	1	1	1	503	57.5	7.68											2.59																				1
FALSE	High	Master Protein	A0A088AK82	SAM-dependent MTase TRM10-type domain-containing protein OS=Apis mellifera OX=7460 PE=4 SV=1		0	FALSE	31.249	25	7	19	7	387	46.5	9.47	8.53		17.14						0	0	12.71										3		5						1	1	4
FALSE	High	Master Protein	A0A088AIP8	SCP2 domain-containing protein OS=Apis mellifera OX=7460 GN=LOC552717 PE=4 SV=1		0	FALSE	101.469	50	15	96	15	413	45.2	8.53	29.39		0	0		12.48			3.2	11.85	90.88		37.6	0		4.73					11		1	2		8			5	4	15		6	1
FALSE	High	Master Protein	A0A088AFH5	Sema domain-containing protein OS=Apis mellifera OX=7460 PE=4 SV=1		0.001	FALSE	3.057	2	1	1	1	1089	121.4	7.68									0																				1
FALSE	High	Master Protein	A0A088ATJ3	Sema domain-containing protein OS=Apis mellifera OX=7460 PE=4 SV=1		0.001	FALSE	3.337	1	1	2	1	1915	214.1	6.48			0																				1
FALSE	High	Master Protein	A0A088AQX9	Serine hydroxymethyltransferase OS=Apis mellifera OX=7460 GN=LOC411796 PE=3 SV=1		0.004	FALSE	2.494	2	1	1	1	522	58.6	8.72											0																				1
FALSE	High	Master Protein	A0A088AB82	Serine/threonine protein phosphatase 2A regulatory subunit OS=Apis mellifera OX=7460 PE=3 SV=1		0	FALSE	11.348	9	4	7	4	474	55.4	7.47	0		2.11	0					1.6		2.02										1		1	1					3		1
FALSE	High	Master Protein	A0A088AUP5	Serine/threonine-protein phosphatase OS=Apis mellifera OX=7460 GN=LOC409430 PE=3 SV=1		0.002	FALSE	2.822	6	2	4	2	329	37.4	6.76		0															1.74	2.33				1
FALSE	High	Master Protein	A0A088A299	Serine/threonine-protein phosphatase OS=Apis mellifera OX=7460 GN=mts PE=3 SV=1		0	FALSE	4.629	8	2	2	2	309	35.4	5.53				1.91																				2
FALSE	High	Master Protein	A0A088A573	Serine--pyruvate aminotransferase OS=Apis mellifera OX=7460 GN=LOC413678 PE=3 SV=1		0	FALSE	6.023	4	1	4	1	397	44.2	8.78			2.33						0		0		0										1						1		1		1
FALSE	High	Master Protein	A0A088ASF2	SERPIN domain-containing protein OS=Apis mellifera OX=7460 GN=serpin-5 PE=3 SV=1		0	FALSE	20.313	14	5	14	5	451	50.7	7.96	1.86	2.61		3.58					5.45		1.65							2.8			2	1		3					4		1
FALSE	High	Master Protein	A0A088ABM1	SERPIN domain-containing protein OS=Apis mellifera OX=7460 PE=3 SV=1		0	FALSE	10.658	17	4	5	4	342	38.6	6.43		2.83										0						4.44	0			1										1
FALSE	High	Master Protein	A0A088ALL8	SH3 domain-containing protein OS=Apis mellifera OX=7460 GN=LOC408693 PE=4 SV=1		0	FALSE	8.58	4	3	4	3	878	99.8	6.09					0						1.91		2.66			0									1						1		1
FALSE	High	Master Protein	A0A088A3R8	SHSP domain-containing protein OS=Apis mellifera OX=7460 GN=724449 PE=3 SV=1		0	FALSE	6.071	12	3	15	3	237	27.7	7.47			7.54	2.38					0	5.68					0								2	3					2	1
FALSE	High	Master Protein	A0A088APK1	SHSP domain-containing protein OS=Apis mellifera OX=7460 GN=LOC408875 PE=3 SV=1		0	FALSE	7.386	17	2	4	2	184	20.5	6.96	2.27			1.77					2.2												1			2					1
FALSE	High	Master Protein	A0A088AE90	SHSP domain-containing protein OS=Apis mellifera OX=7460 GN=LOC410857 PE=3 SV=1		0	FALSE	4.642	15	2	6	2	191	22	6.23																0
FALSE	High	Master Protein	A0A088A3R2	SHSP domain-containing protein OS=Apis mellifera OX=7460 PE=3 SV=1		0	FALSE	45.784	59	9	23	9	185	21.8	6.55			48.06								0			0									9								2			1
FALSE	High	Master Protein	A0A088A3R6	SHSP domain-containing protein OS=Apis mellifera OX=7460 PE=3 SV=1		0.001	FALSE	3.276	7	1	1	1	209	24.2	5.27			2.14																				1
FALSE	High	Master Protein	A0A088A4I8	Sidoreflexin OS=Apis mellifera OX=7460 GN=LOC550915 PE=3 SV=1		0	FALSE	93.888	48	14	99	14	326	36.8	9.1	10.3		91.35	9.83	11.86	2.36		2.64	25.01	13.34	23.03		5.59	0							5		11	4	4	2		3	11	6	6		2	1
FALSE	High	Master Protein	A0A088A934	Signal peptidase complex catalytic subunit SEC11 OS=Apis mellifera OX=7460 GN=Spase18-21 PE=3 SV=1		0	FALSE	14.46	19	3	15	3	180	20.7	9.13	2.11		17.42	2.59	2.83	1.81			0		4.42										1		3	1	1	1			1		2
FALSE	High	Master Protein	A0A087ZPW9	Signal peptidase complex subunit 3 OS=Apis mellifera OX=7460 GN=Spase22-23 PE=3 SV=1		0	FALSE	4.688	11	2	8	2	179	20.3	7.24			1.9		1.91	0		0			1.67		4.42					2.44					1		1	1		1			1		1
FALSE	High	Master Protein	A0A088AFN8	Signal recognition particle 54 kDa protein OS=Apis mellifera OX=7460 GN=LOC552114 PE=3 SV=1		0.001	FALSE	3.549	3	1	1	1	498	55	8.65			2.14																				1
FALSE	High	Master Protein	A0A087ZX45	Signal recognition particle 9 kDa protein OS=Apis mellifera OX=7460 GN=Srp9 PE=3 SV=1		0.002	FALSE	2.73	10	1	2	1	78	9.4	8.87																		3.55
FALSE	High	Master Protein	A0A087ZMS5	Small nuclear ribonucleoprotein Sm D2 OS=Apis mellifera OX=7460 PE=3 SV=1		0	FALSE	5.658	18	2	2	2	110	12.5	9.99																		2.39
FALSE	High	Master Protein	A0A087ZZ04	SMB domain-containing protein OS=Apis mellifera OX=7460 GN=LOC409789 PE=3 SV=1		0	FALSE	431.843	70	32	1146	32	439	50.2	7.31	15.83	0	538.47	349.55	423.17	4.79	5.73	205.82	113.27	641.65	0		86.6	0	268.39	2.53			8.92	52.32	9	1	31	29	26	5	2	24	23	32	1		12	6
FALSE	High	Master Protein	A0A088A605	S-methyl-5'-thioadenosine phosphorylase OS=Apis mellifera OX=7460 GN=LOC552740 PE=3 SV=1		0	FALSE	59.956	53	11	86	11	285	31.5	7.2	2.07	7.68	7.82	8.52	2.37	8.73	0	31.14	0	9.61	33.26	1.79	5.09	0	7.29			15.89	4.19		2	3	3	5	2	6	1	10	3	5	9	1	2	5
FALSE	High	Master Protein	A0A088AMA0	Sodium/nucleoside cotransporter OS=Apis mellifera OX=7460 GN=LOC410532 PE=3 SV=1		0	FALSE	11.012	7	3	4	3	588	65.5	8.21			3.57								1.98		0			0							1								1		1
FALSE	High	Master Protein	A0A087ZTA6	Sodium/potassium-transporting ATPase subunit alpha OS=Apis mellifera OX=7460 PE=3 SV=1		0	FALSE	80.619	20	16	35	16	1035	115.2	5.81			63.09	0					0	2.33	0		0										16	1					3	1	1		1
FALSE	High	Master Protein	A0A088AHB9	Solute carrier organic anion transporter family member OS=Apis mellifera OX=7460 GN=LOC409649 PE=3 SV=1		0	FALSE	7.719	4	3	3	3	696	77	7.94			3.66										0										2										1
FALSE	High	Master Protein	A0A088AHC0	Solute carrier organic anion transporter family member OS=Apis mellifera OX=7460 GN=LOC409650 PE=3 SV=1		0	FALSE	55.354	16	10	36	10	717	79.4	8.16		5.96	36.81			0	2.64	3.64		0	11.03	0	2.94	1.67			1.69		1.84			1	9			3	1	1		1	3	1	1	4
FALSE	High	Master Protein	A0A088ATA4	Sorting nexin OS=Apis mellifera OX=7460 PE=3 SV=1		0	FALSE	3.99	3	1	6	1	404	46.8	6.14			1.84						2.52	1.64			2.01										1						1	1			1
FALSE	High	Master Protein	A0A088AI16	Spaetzle domain-containing protein OS=Apis mellifera OX=7460 GN=LOC726201 PE=4 SV=1		0.006	FALSE	2.431	2	1	3	1	483	55.3	7.94															0			0
FALSE	High	Master Protein	A0A088ALU3	Spaetzle domain-containing protein OS=Apis mellifera OX=7460 PE=4 SV=1		0	FALSE	6.81	12	3	7	3	323	36.8	8.51			2.32			0		0				0		0					1.7				1			1		1				1		1
FALSE	High	Master Protein	A0A088ANZ7	Spectrin beta chain OS=Apis mellifera OX=7460 GN=beta-Spec PE=3 SV=1		0	FALSE	121.734	16	28	90	27	2401	277.6	5.71	9.04		50.04	25.29	4.15	10.31		2.07	27.19	9.27	9.34		7.3	5.65	6.53	0					2		17	9	2	2		1	16	3	3		3	4
FALSE	High	Master Protein	A0A088AJK9	Sphingomyelin phosphodiesterase OS=Apis mellifera OX=7460 PE=3 SV=1		0	FALSE	18.228	10	5	25	5	562	65.5	6.79	0	5.67		1.64	2.19	4	0	2.04	2.07		3.89		2.6	3.79	1.82		3.38	1.88			1	2		2	1	2	1	1	3		2		1	1
FALSE	High	Master Protein	A0A088ANW3	SSD domain-containing protein OS=Apis mellifera OX=7460 GN=LOC408992 PE=4 SV=1		0	FALSE	87.196	21	21	69	21	1240	140.9	6.21		4.22	4.96		21.85			0		17.02	2.55		53.06		9.1		6.2	2.37		0		2	2		11			2		9	2		15
FALSE	High	Master Protein	A0A087ZWG1	SSD domain-containing protein OS=Apis mellifera OX=7460 PE=4 SV=1		0	FALSE	25.148	6	8	21	8	1442	161.6	6.89	0		11.82		7.85			2.37		3.34	0		2.47					1.72			1		6		3			2		2	1		2
FALSE	High	Master Protein	A0A087ZQD4	Staphylococcal nuclease domain-containing protein OS=Apis mellifera OX=7460 GN=Tudor-SN PE=4 SV=1		0	FALSE	24.94	8	6	22	6	892	100.9	7.96	2.53			4.19		4.72		0	10.98	2.39	8.96		2.31	0							1			3		1		1	4	1	4		1	1
FALSE	High	Master Protein	A0A088ASI9	STAS domain-containing protein OS=Apis mellifera OX=7460 PE=3 SV=1		0.003	FALSE	2.664	2	1	1	1	662	74.9	7.88			2.28																				1
FALSE	High	Master Protein	A0A087ZTD1	Str_synth domain-containing protein OS=Apis mellifera OX=7460 PE=4 SV=1		0	FALSE	35.847	21	9	79	9	564	63.1	9.09	6.64	8.62	15.48	4.36	4.07	0	1.68	10.92	0	1.73	10.42	1.79	22.91	0	0		2.38	11.42	3.57		3	3	6	4	2	5	1	4	1	2	4	1	5	1
FALSE	High	Master Protein	A5A5E4	Structural cuticle protein (Fragment) OS=Apis mellifera OX=7460 PE=2 SV=1		0	FALSE	41.721	16	1	186	1	138	14.6	4.41	30.01		51.57	5.87		14.36		22.94	0	44.31		3.16			63.84	6.16			150.13		1		1	1		1		1	1	1		1
FALSE	High	Master Protein	A0A088A3W0	Succinate dehydrogenase [ubiquinone] cytochrome b small subunit OS=Apis mellifera OX=7460 GN=LOC725566 PE=3 SV=1		0	FALSE	5.227	13	2	21	2	201	22.3	9.32	2.07		4.73			0		1.84	3.56		0		1.86						1.87		2		2			1		1	2		2		1
FALSE	High	Master Protein	A0A088A6T4	Succinate dehydrogenase [ubiquinone] flavoprotein subunit, mitochondrial OS=Apis mellifera OX=7460 GN=SdhA PE=3 SV=1		0	FALSE	137.201	49	19	107	19	661	72.4	7.18	30.8		88.97	4.69		10.34		1.98	12.83	1.63	69.87			3.83		1.63					12		16	2		6		3	5	2	17			1
FALSE	High	Master Protein	A0A088AQ13	Succinate dehydrogenase [ubiquinone] iron-sulfur subunit, mitochondrial OS=Apis mellifera OX=7460 GN=LOC551169 PE=3 SV=1		0	FALSE	51.402	48	11	92	11	254	29	8.78	21.5		45.04	2.08	0	0		2.06	4.95	2.2	23.66			0							10		9	7	1	6		1	7	1	9			2
FALSE	High	Master Protein	A0A088ADV3	Succinate--CoA ligase [ADP/GDP-forming] subunit alpha, mitochondrial OS=Apis mellifera OX=7460 GN=Scsalpha PE=3 SV=1		0	FALSE	97.853	48	13	105	13	340	36	9	39.13		23.69	4.44		15.13			9.1	2.69	74.68		0	3.37		4.96					9		6	3		7			6	1	10		1	3
FALSE	High	Master Protein	A0A080UXF7	Succinate--CoA ligase [ADP-forming] subunit alpha OS=Serratia marcescens OX=615 GN=sucD PE=3 SV=1		0.002	FALSE	2.966	4	1	1	1	290	29.8	7.08			2.13																				1
FALSE	High	Master Protein	A0A088ARY0	Succinate--CoA ligase [ADP-forming] subunit beta, mitochondrial OS=Apis mellifera OX=7460 PE=3 SV=1		0	FALSE	77.399	31	12	87	12	448	48.6	7.33	41.17		22.58	4.89		17.95			17.62	2.2	74.47			10.54		4.05					8		7	2		6			5	1	11			3
FALSE	High	Master Protein	V5T6X6	Succinate-semialdehyde dehydrogenase OS=Bifidobacterium sp. Hma3N OX=1293831 PE=3 SV=1		0.004	FALSE	2.506	2	1	1	1	457	49.6	4.91																			0
FALSE	High	Master Protein	A0A087ZSQ3	Succinyl-CoA:3-ketoacid-coenzyme A transferase OS=Apis mellifera OX=7460 GN=LOC409157 PE=3 SV=1		0.001	FALSE	3.788	3	1	2	1	541	58.9	5.57	2.43					0															1					1
FALSE	High	Master Protein	A0A088AUJ3	Sulfatase domain-containing protein OS=Apis mellifera OX=7460 GN=LOC552073 PE=4 SV=1		0	FALSE	96.943	36	16	407	16	546	61.1	6.89	2.43	103.28		15.43	8.48	3.87	61.65	4.59	7.03	2.59	0	105.2	95.1	7			256.5	206.31	1.65		3	13		6	4	2	7	4	4	2	1	13	13	4
FALSE	High	Master Protein	A0A087ZV16	Sulfhydryl oxidase OS=Apis mellifera OX=7460 GN=Alr PE=4 SV=1		0	FALSE	4.347	22	2	2	2	158	18.6	7.61													0																				2
FALSE	High	Master Protein	A0A088A7I5	Sulfhydryl oxidase OS=Apis mellifera OX=7460 GN=LOC725287 PE=4 SV=1		0.002	FALSE	2.879	2	1	1	1	645	76	8.1											1.81																				1
FALSE	High	Master Protein	Q7YXM6	Superoxide dismutase [Cu-Zn] OS=Apis mellifera ligustica OX=7469 GN=Sod1 PE=2 SV=1		0	FALSE	79.502	86	10	672	10	152	15.6	6.71	21.49	135.42	4.13	10	30.09	4.15	71.75	19.66	6.88	13.51	19.97	92.21	54.38	0	2.97	0	686.62	871.95	7.09		6	9	2	4	6	3	8	6	4	5	4	7	5	1
FALSE	High	Master Protein	A0A1B1JID1	Superoxide dismutase [Cu-Zn] OS=Apis mellifera OX=7460 PE=2 SV=1		0	FALSE	51.858	48	7	102	7	177	18.9	6.86	0	34.75		5.93	2.34		21.46	2.33	2.18			61.43	6.65				118.94	24.2	0		1	5		3	1		3	1	3			6	2
FALSE	High	Master Protein	A0A088A1K0	Superoxide dismutase OS=Apis mellifera OX=7460 GN=Sod2 PE=3 SV=1		0	FALSE	54.723	37	7	97	7	218	24.5	9.04	33.39	43.32	12.22	9.72		4.44	6.84	6.19	2.43	12.76	12.95	6.46	44.16	6.16			1.74	47.49	2.01		4	6	3	3		2	2	2	3	2	4	2	7	2
FALSE	High	Master Protein	A0A2G5S816	Superoxide dismutase OS=Serratia marcescens OX=615 GN=CS366_06715 PE=3 SV=1		0	FALSE	6.188	7	1	2	1	206	23.3	6.74			4.33																				1
FALSE	High	Master Protein	A0A088A2C3	SURF1-like protein OS=Apis mellifera OX=7460 GN=Surf1 PE=3 SV=1		0	FALSE	5.367	5	1	1	1	307	36.2	9.76			3.71																				1
FALSE	High	Master Protein	V5T7A2	Surface layer protein OS=Lactobacillus helsingborgensis OX=1218494 GN=JF73_14730 PE=4 SV=1		0	FALSE	21.078	6	3	10	1	593	61.9	9.19			17.73																2.54				3
FALSE	High	Master Protein	V5T8V6	Surface layer protein OS=Lactobacillus kimbladii OX=1218506 GN=JF75_16750 PE=4 SV=1		0	FALSE	39.148	10	7	18	5	603	63.1	9.36			32.44																3.87				7
FALSE	High	Master Protein	V5T8R4	Surface layer protein OS=Lactobacillus sp. Hma11N OX=1218505 PE=4 SV=1		0	FALSE	13.49	7	3	7	3	577	60	9.48			10.94					2.07															1					2
FALSE	High	Master Protein	A0A088A062	Synaptosomal-associated protein OS=Apis mellifera OX=7460 PE=3 SV=1		0	FALSE	11.058	17	2	3	2	162	18.1	4.89													0					3.25	0														1
FALSE	High	Master Protein	A0A088A105	Syntaxin-18_N domain-containing protein OS=Apis mellifera OX=7460 GN=Syx18 PE=4 SV=1		0	FALSE	4.977	4	1	1	1	323	37.4	5.86																		2.58
FALSE	High	Master Protein	Q5XUU6	Take-out-like carrier protein JHBP-1 OS=Apis mellifera OX=7460 PE=2 SV=1		0	FALSE	57.44	45	12	38	12	253	29.2	8.32	22.42		1.65						43.82												9		1						12
FALSE	High	Master Protein	A0A088AVZ9	T-complex protein 1 subunit alpha OS=Apis mellifera OX=7460 GN=LOC409134 PE=3 SV=1		0	FALSE	5.108	3	1	5	1	557	59.9	5.91	2.17			2.15		0			0												1			1		1			1
FALSE	High	Master Protein	A0A088AHM7	T-complex protein 1 subunit delta OS=Apis mellifera OX=7460 GN=LOC551275 PE=3 SV=1		0	FALSE	18.049	5	3	43	3	534	57.3	7.42	2.66		12.02	4.47	2.41	5.01		0	11	7.86	10.97		8.65	4.63	2.17						2		2	2	1	1		1	2	3	2		1	1
FALSE	High	Master Protein	A0A087ZUG4	T-complex protein 1 subunit eta OS=Apis mellifera OX=7460 GN=Tcp-1eta PE=3 SV=1		0	FALSE	4.481	5	2	8	2	542	59.9	6.42	1.78		0	1.79		1.68			1.99	2.13	2.04										1		1	1		1			1	2	1
FALSE	High	Master Protein	A0A088A3C0	T-complex protein 1 subunit gamma OS=Apis mellifera OX=7460 GN=Cctgamma PE=3 SV=1		0	FALSE	12.034	6	3	4	3	550	61	6.57			2.24	0					2.23														1	1					2
FALSE	High	Master Protein	A0A087ZVC8	TCTP domain-containing protein OS=Apis mellifera OX=7460 GN=Tctp PE=3 SV=1		0	FALSE	3.706	7	1	1	1	172	19.8	4.7											2.37																				1
FALSE	High	Master Protein	A0A088AV46	Tetraspanin OS=Apis mellifera OX=7460 GN=102656585 PE=3 SV=1		0.006	FALSE	2.404	4	1	1	1	264	29.3	7.33			2.31																				1
FALSE	High	Master Protein	A0A088AJF6	Tetraspanin OS=Apis mellifera OX=7460 GN=Tspan11 PE=3 SV=1		0	FALSE	9.637	8	2	10	2	285	31.6	6.2	2.2		5.66	2.09		0			1.7		1.92		2.94								2		2	2		1			1		1		1
FALSE	High	Master Protein	A0A088A8X8	Tetraspanin OS=Apis mellifera OX=7460 GN=Tspan3 PE=3 SV=1		0	FALSE	28.691	34	5	100	5	241	27.3	7.08	8.09		43.03	14.62	16.31	4.14		9.87	9.96	23.08	5.71		6.09	3.86	6.48	2.37	9.2		0	3.64	2		4	2	3	2		3	3	3	2		2	2
FALSE	High	Master Protein	A0A088ASL1	Tetraspanin OS=Apis mellifera OX=7460 GN=Tspan9 PE=3 SV=1		0	FALSE	13.958	22	3	3	3	267	28.5	5.05			6.56																				3
FALSE	High	Master Protein	Q9NB07	Tetraspanin OS=Apis mellifera OX=7460 PE=2 SV=1		0	FALSE	22.77	10	3	150	3	232	25.3	6.7	12.51	1.67	18.38	0	5.49	3.46	1.7	6.36	5.53	1.86	25.92	9.81	21.26	8.39	7.03		3.43	45.32		5.85	3	1	3	1	1	1	1	2	2	2	3	3	3	2
FALSE	High	Master Protein	A0A088AKR6	TGc domain-containing protein OS=Apis mellifera OX=7460 GN=LOC409425 PE=4 SV=1		0	FALSE	6.455	3	2	3	2	713	80.6	5.01				0					1.63															1					2
FALSE	High	Master Protein	A0A087ZQT4	TGS domain-containing protein OS=Apis mellifera OX=7460 GN=100576663 PE=4 SV=1		0	FALSE	28.245	29	9	17	9	329	37.5	8.66	3.49		4.29						0		8.94										5		2						1		8
FALSE	High	Master Protein	A0A087ZSW3	Thioredoxin domain-containing protein OS=Apis mellifera OX=7460 GN=726314 PE=4 SV=1		0	FALSE	7.075	7	2	4	2	285	33.1	8.63	0		2.3						1.71		2.42										1		1						1		1
FALSE	High	Master Protein	A0A088AS52	Thioredoxin domain-containing protein OS=Apis mellifera OX=7460 GN=LOC411255 PE=4 SV=1		0	FALSE	12.347	14	3	6	3	296	34.2	6.27	1.84		2.11	0							4.38	2.15									1		1	1							2	1
FALSE	High	Master Protein	A0A087ZND2	Thioredoxin domain-containing protein OS=Apis mellifera OX=7460 GN=Tpx-1 PE=4 SV=1		0	FALSE	42.529	58	9	65	9	194	21.8	5.97	2.64		7.5	17.5	20.16	4.9		2.27	15.73	10.08	7.27		11.32	3.87		3.36		13.63			3		3	7	5	2		1	9	3	2		2	2
FALSE	High	Master Protein	A0A087ZRJ5	Thioredoxin domain-containing protein OS=Apis mellifera OX=7460 GN=Tpx-4 PE=4 SV=1		0	FALSE	87.577	88	15	116	15	220	25.1	6.34	5.58		7.35	38.75		5.74			19.8	9.51	73.33		3.87	11.03		2.02		7.59	0		4		5	10		5			7	3	11		1	6
FALSE	High	Master Protein	A0A088AA01	Thioredoxin domain-containing protein OS=Apis mellifera OX=7460 GN=Trx1-like3 PE=4 SV=1		0	FALSE	23.41	19	7	22	7	427	49.3	5.8	0		5.23	3.76		2.32			0	6.89	5.92		7.04		1.75						1		1	2		1			1	5	3		3
FALSE	High	Master Protein	A0A087ZTI1	Thioredoxin domain-containing protein OS=Apis mellifera OX=7460 PE=4 SV=1		0	FALSE	6.402	14	2	7	2	188	20.7	5.58															0				1.63
FALSE	High	Master Protein	A0A088ABX7	Thioredoxin domain-containing protein OS=Apis mellifera OX=7460 PE=4 SV=1		0	FALSE	18.965	22	5	10	5	291	33.4	6.28	0		10.26			0					2.59										3		3			1					2
FALSE	High	Master Protein	A0A088AAY9	Thioredoxin OS=Apis mellifera OX=7460 GN=Trx-2 PE=3 SV=1		0	FALSE	12.47	48	4	22	4	105	12	4.92	2.3	5.45	2.33	2.8	2.12	1.72		2.57	2.14			7.53	7.61			0	5.18	5.31	0		1	1	1	1	1	1		1	2			2	2
FALSE	High	Master Protein	Q7YXM3	Thioredoxin peroxidase OS=Apis mellifera ligustica OX=7469 GN=Tpx-3 PE=2 SV=1		0	FALSE	54.654	42	8	84	8	242	27.2	8.82	36.49		5.78	11.65		10.34		4.61	14.55	8.68	47.12		29.99	4.23		3.08		2.78			8		2	6		5		2	7	5	7		5	3
FALSE	High	Master Protein	Q7YXM4	Thioredoxin reductase OS=Apis mellifera ligustica OX=7469 GN=Trxr-1 PE=2 SV=1		0	FALSE	117.866	51	18	232	1	485	53.2	7.33	23.99	44.27	8.67	16.08	39.33	9.99	11.85	5.24	9.55	3.15	24.81	62.22	63.29	0			38.04	200.71	0		8	10	3	5	8	6	3	1	5	2	8	12	13	2
FALSE	High	Master Protein	A0A087ZNG4	Tim44 domain-containing protein OS=Apis mellifera OX=7460 GN=mRpL45 PE=4 SV=1		0	FALSE	16.699	22	5	11	5	332	38.9	9.22	0		7.26								6.97										3		3								3
FALSE	High	Master Protein	A0A088AQ11	TOG domain-containing protein OS=Apis mellifera OX=7460 GN=LOC551331 PE=4 SV=1		0	FALSE	3.738	1	1	1	1	1315	147.6	7.01			0																				1
FALSE	High	Master Protein	A0A088A423	TPR_REGION domain-containing protein OS=Apis mellifera OX=7460 GN=Tom70 PE=4 SV=1		0	FALSE	4.616	3	1	1	1	576	65.3	6.74											1.75																				1
FALSE	High	Master Protein	A0A088ASE7	TPR_REGION domain-containing protein OS=Apis mellifera OX=7460 PE=4 SV=1		0	FALSE	28.175	9	7	38	7	1006	115.4	7.27				16.02		10.21		0	6	9.79	9.1		6.5	0	9.34			0						6		4		1	3	4	3		2	2
FALSE	High	Master Protein	A0A087ZPV0	Transaldolase OS=Apis mellifera OX=7460 PE=3 SV=1		0	FALSE	39.945	42	10	46	10	332	37.2	8.03		11.96		4.15	2.02	3.84		1.88	3.94	1.77	2.2	10.71	4.01	1.98			10.13	31.35				4		2	1	2		1	1	1	2	4	2	1
FALSE	High	Master Protein	A0A093UX55	Transcriptional regulator HU subunit alpha OS=Pectobacterium carotovorum subsp. carotovorum OX=555 GN=KP17_12810 PE=3 SV=1		0.007	FALSE	2.356	10	1	1	1	90	9.3	9.52			0																				1
FALSE	High	Master Protein	A0A088ASZ6	Transgelin OS=Apis mellifera OX=7460 GN=Mp20 PE=3 SV=1		0	FALSE	24.697	13	3	13	2	184	20.5	8.66	3.17			8.99					6.64												1			3					3
FALSE	High	Master Protein	A0A087ZNF1	Transgelin OS=Apis mellifera OX=7460 PE=3 SV=1		0	FALSE	5.163	17	2	5	1	121	13.1	9.54				4.09					2.19															2					1
FALSE	High	Master Protein	A0A088AUY4	Transket_pyr domain-containing protein OS=Apis mellifera OX=7460 GN=LOC550804 PE=4 SV=1		0	FALSE	36.832	18	8	28	8	622	67.4	7.74	0		18.33	15.41		2.1			3.82		2.88			0							1		5	6		4			5		2			1
FALSE	High	Master Protein	A0A088AHH8	Transket_pyr domain-containing protein OS=Apis mellifera OX=7460 PE=4 SV=1		0	FALSE	191.317	36	31	132	31	1121	126.5	8.09	47.5		63.2	4.88		10.47			12.63	0	135.02			4.13		0					15		13	3		11			9	1	28			3
FALSE	High	Master Protein	A0A088AJ89	Translocon-associated protein subunit beta OS=Apis mellifera OX=7460 GN=SsRbeta PE=3 SV=1		0	FALSE	4.028	6	1	1	1	191	21.9	7.14			2.22																				1
FALSE	High	Master Protein	A0A088A292	Transmembrane 9 superfamily member OS=Apis mellifera OX=7460 GN=LOC552455 PE=3 SV=1		0.001	FALSE	2.989	2	1	1	1	662	75.8	7.85											2.33																				1
FALSE	High	Master Protein	A0A088A1M4	Transmembrane 9 superfamily member OS=Apis mellifera OX=7460 GN=LOC552723 PE=3 SV=1		0	FALSE	23.773	12	5	11	5	632	72.4	8.82			4.4	0		0					17.56		6.53										1	1		1					5		2
FALSE	High	Master Protein	A0A088AA94	Transmembrane 9 superfamily member OS=Apis mellifera OX=7460 PE=3 SV=1		0	FALSE	4.764	3	2	2	2	586	67.8	6.65											0								0												1
FALSE	High	Master Protein	A0A088AJW4	Transporter OS=Apis mellifera OX=7460 GN=725456 PE=3 SV=1		0.006	FALSE	2.459	1	1	1	1	623	70.2	6.54			1.72																				1
FALSE	High	Master Protein	A0A088AJW5	Transporter OS=Apis mellifera OX=7460 GN=LOC725420 PE=3 SV=1		0.003	FALSE	2.683	2	1	3	1	617	69.2	7.68								0		2.3		0																1		1		1
FALSE	High	Master Protein	A0A088AJX6	Transporter OS=Apis mellifera OX=7460 PE=3 SV=1		0	FALSE	5.067	3	1	1	1	616	70.2	7.68			2.19																				1
FALSE	High	Master Protein	A0A087EP71	Trigger factor OS=Lactobacillus kunkeei OX=148814 GN=tig PE=3 SV=1		0.002	FALSE	2.974	3	1	1	1	434	48.6	4.78		2.35																				1
FALSE	High	Master Protein	A4ZXC4	Triosephosphate isomerase OS=Apis mellifera OX=7460 GN=Tpi PE=2 SV=1		0	FALSE	16.098	27	6	13	6	247	26.9	8.05		1.71		1.72					0			0					3.95	4.33				2		2					1			1
FALSE	High	Master Protein	A0A088APT9	tRNA pseudouridine synthase OS=Apis mellifera OX=7460 GN=LOC725326 PE=3 SV=1		0.001	FALSE	3.222	6	1	2	1	313	36.7	9.01			0																				1
FALSE	High	Master Protein	A0A088AKU7	tRNA pseudouridine synthase OS=Apis mellifera OX=7460 PE=4 SV=1		0	FALSE	4.183	5	2	4	2	389	45.6	8.06	0					0					1.84										1					1					2
FALSE	High	Master Protein	A0A088A7K9	tRNA-synt_1c domain-containing protein OS=Apis mellifera OX=7460 PE=3 SV=1		0	FALSE	5.566	9	2	3	2	379	43.9	9.36			0								0												1								2
FALSE	High	Master Protein	A0A088AJD4	tRNA-synt_1e domain-containing protein OS=Apis mellifera OX=7460 PE=4 SV=1		0	FALSE	15.89	9	3	10	3	427	49.2	8.68	3.36		9.86								5.22										2		3								3
FALSE	High	Master Protein	A0A088AEZ6	tRNA-synt_1g domain-containing protein OS=Apis mellifera OX=7460 PE=3 SV=1		0	FALSE	13.498	7	4	7	4	778	91.3	8.7	0		3.16								13.48										1		1								4
FALSE	High	Master Protein	I7LRF0	Troponin C type I OS=Apis mellifera OX=7460 GN=TpnCI PE=4 SV=1		0	FALSE	16.386	37	4	7	4	145	16.8	4.27				8.67					0							2.83								3					1
FALSE	High	Master Protein	Q3B708	Troponin I isoform 6a1 OS=Apis mellifera OX=7460 GN=TpnI PE=4 SV=1		0.002	FALSE	2.947	6	1	1	1	212	25.4	9.72				2.15																				1
FALSE	High	Master Protein	A0A088AIB2	Tr-type G domain-containing protein OS=Apis mellifera OX=7460 GN=eIF5B PE=4 SV=1		0.001	FALSE	3.117	1	1	2	1	1050	119.1	6.11				0					0															1					1
FALSE	High	Master Protein	A0A088A5X7	Tr-type G domain-containing protein OS=Apis mellifera OX=7460 GN=LOC409167 PE=4 SV=1		0	FALSE	34.763	24	11	19	11	844	94.5	6.52	0		4.61	2.17		0			9.96	0	0		5.39								1		3	1		1			7	1	2		2
FALSE	High	Master Protein	A0A087ZT79	Tr-type G domain-containing protein OS=Apis mellifera OX=7460 PE=4 SV=1		0	FALSE	24.467	15	7	15	7	690	78.1	8.5	5.2		3.32			0			2.23		9.07										2		2			1			2		6
FALSE	High	Master Protein	A0A087ZT96	Tr-type G domain-containing protein OS=Apis mellifera OX=7460 PE=4 SV=1		0	FALSE	29.909	12	8	14	8	901	102.1	8.56	0		3.01						2.11		16.37										1		3						1		7
FALSE	High	Master Protein	A0A087ZPT1	t-SNARE coiled-coil homology domain-containing protein OS=Apis mellifera OX=7460 GN=LOC552117 PE=3 SV=1		0	FALSE	4.976	6	1	1	1	364	41.1	8.16																		3.24
FALSE	High	Master Protein	A0A088A9P5	t-SNARE coiled-coil homology domain-containing protein OS=Apis mellifera OX=7460 GN=Syx7 PE=3 SV=1		0	FALSE	22.471	17	3	8	3	271	30.7	8.12								2.38			2.38					0		11.1										2			1
FALSE	High	Master Protein	A0A088AKL6	Tubulin alpha chain OS=Apis mellifera OX=7460 GN=LOC408388 PE=3 SV=1		0	FALSE	86.906	34	11	139	7	450	49.9	5.14	12.82	10.49	35.8	17.28	2.77	27.95	2.36	6.64	16.19	27.04	56.88	2.44	9.64	19.24	3.53	9.89		11.11	1.92		5	2	6	5	1	6	2	3	7	5	7	1	2	8
FALSE	High	Master Protein	A0A088ATP8	Tubulin alpha chain OS=Apis mellifera OX=7460 PE=3 SV=1		0	FALSE	41.096	16	5	87	1	480	53.6	5.38	7.23	5.56	25.33	9.47	1.91	20.42	0	6.11	11.23	23.82	24.47		11.19	9.3	1.64	5.81					3	2	3	2	1	4	1	2	3	3	4		2	4
FALSE	High	Master Protein	A0A087ZYZ1	Tubulin beta chain OS=Apis mellifera OX=7460 GN=LOC408782 PE=3 SV=1		0	FALSE	92.21	53	17	162	17	447	50.1	4.86	8.81	2.25	73.71	51.75	1.9	18.18		9.58	35.38	40.51	46.5		4.48	24.88	1.91	22.95	0	1.94			7	1	10	12	1	8		3	7	6	10		3	9
FALSE	High	Master Protein	B8XIJ0	Tweedle motif cuticular protein 1 (Fragment) OS=Apis mellifera OX=7460 GN=Twld1 PE=2 SV=1		0	FALSE	66.986	26	4	446	3	331	30.5	9.23	37.59	94.73	98.25	12.38	14.67	96.69	24.84	58.63	6.44	27	51.94	110.89	12.36	76.52	111.61	0	11.98	4.13	124.39	2.99	3	4	4	2	3	4	2	4	3	4	3	4	3	3
FALSE	High	Master Protein	E2IFU8	Tweedle motif cuticular protein 2 (Fragment) OS=Apis mellifera OX=7460 GN=Twdl2 PE=2 SV=2		0	FALSE	54.229	52	6	470	5	185	20.1	8.48	94.44	59.88	86.99	14.26	35.83	92.87	19.46	54.32	1.63	21.6	51.13	86	12	85.38	106.11	3.75	5.35		77.99	38.36	3	6	4	2	3	5	3	5	2	3	3	6	3	3
FALSE	High	Master Protein	A0A088AMC1	Tyrosine--tRNA ligase OS=Apis mellifera OX=7460 GN=Aats-tyr PE=3 SV=1		0.001	FALSE	3.088	2	1	5	1	522	58.7	6				0		0			0		1.91													1		1			1		1
FALSE	High	Master Protein	A0A088A004	Tyrosine--tRNA ligase OS=Apis mellifera OX=7460 PE=3 SV=1		0	FALSE	8.968	11	3	4	3	441	50.8	8.91			3.61								4.31												1								3
FALSE	High	Master Protein	A0A088A1S9	UAS domain-containing protein OS=Apis mellifera OX=7460 PE=4 SV=1		0	FALSE	6.51	4	1	1	1	409	47.8	6.07			4.69																				1
FALSE	High	Master Protein	A0A088AVS9	UBA_e1_C domain-containing protein OS=Apis mellifera OX=7460 GN=Uba1 PE=3 SV=1		0	FALSE	9.907	4	2	4	2	1049	117	5.6				7.76				2.37																2				1
FALSE	High	Master Protein	A0A088A361	Ubiquinone biosynthesis monooxygenase COQ6, mitochondrial OS=Apis mellifera OX=7460 GN=LOC412426 PE=3 SV=1		0	FALSE	21.248	12	4	19	4	474	52.5	7.97	5.95		16.52			0			0		12.97										4		3			1			1		4
FALSE	High	Master Protein	A0A087ZYC5	Ubiquinone biosynthesis O-methyltransferase, mitochondrial OS=Apis mellifera OX=7460 GN=LOC412082 PE=3 SV=1		0	FALSE	9.635	12	2	5	2	286	31.8	8.65			4.76								1.78		2.1					1.94					1								1		1
FALSE	High	Master Protein	A0A088A9U4	Ubiquinone biosynthesis protein OS=Apis mellifera OX=7460 PE=3 SV=1		0	FALSE	12.476	5	2	6	2	689	79.9	8.21	3.25		7.11						2.42		2.59										2		2						1		1
FALSE	High	Master Protein	A0A088A9Q7	Ubiquitin carboxyl-terminal hydrolase OS=Apis mellifera OX=7460 GN=LOC408911 PE=3 SV=1		0.005	FALSE	2.47	1	1	1	1	1280	147.4	5.31									1.74																				1
FALSE	High	Master Protein	A0A087ZQN5	Ubiquitin carboxyl-terminal hydrolase OS=Apis mellifera OX=7460 GN=LOC411572 PE=3 SV=1		0	FALSE	3.614	2	1	5	1	498	56.4	5.49	0		1.9	2.16					1.71												1		1	1					1
FALSE	High	Master Protein	A0A088AG51	UBIQUITIN_CONJUGAT_2 domain-containing protein OS=Apis mellifera OX=7460 GN=LOC724793 PE=3 SV=1		0	FALSE	12.084	24	2	19	2	147	16.7	7.3	2.4			1.63		1.93			4.69	2.53	4.3		2.41	0							1			2		2			2	2	1		1	1
FALSE	High	Master Protein	A0A088A3B1	UBIQUITIN_CONJUGAT_2 domain-containing protein OS=Apis mellifera OX=7460 GN=Ubc13 PE=3 SV=1		0	FALSE	16.941	28	3	18	3	151	17.2	6.01	0		5.21	6.41		4.36			9.31	5.8	0										1		2	3		2			3	3	1
FALSE	High	Master Protein	A0A088AN20	Ubiquitin-like domain-containing protein OS=Apis mellifera OX=7460 GN=RpL40 PE=4 SV=1		0	FALSE	35.265	41	5	296	1	128	14.7	9.83	4.02	14.61	49.2	29.59	0	5.88	3.42	33.73	33.63	16.18	40.1	10.11	83.16	4.25	19.12	31.52	24.88	127.77	5.51	1.65	3	3	5	4	1	4	1	5	4	4	5	3	5	3
FALSE	High	Master Protein	A0A088ARA7	Ubiquitin-like domain-containing protein OS=Apis mellifera OX=7460 PE=4 SV=1		0	FALSE	11.288	4	3	7	3	920	105.4	8.37	2.18		3.76								3.6		2								2		1								2		1
FALSE	High	Master Protein	A0A087ZRU4	Ubiquitin-like domain-containing protein OS=Apis mellifera OX=7460 PE=4 SV=1		0	FALSE	5.302	1	1	1	1	1310	144	5.39																		3.29
FALSE	High	Master Protein	A0A088A7I2	UDP-glucuronosyltransferase OS=Apis mellifera OX=7460 GN=LOC409203 PE=3 SV=1		0	FALSE	69.767	35	12	61	12	526	60.2	8.81		3.87	54.98	5.8	4.23	2.74		4.67		1.63	40.66	9.42	2.09	5.12	4.59							1	9	4	2	1		1		2	12	3	1	3
FALSE	High	Master Protein	A0A088A7I0	UDP-glucuronosyltransferase OS=Apis mellifera OX=7460 GN=LOC727593 PE=3 SV=1		0	FALSE	14.705	14	5	6	5	523	59.7	7.99			5.25									2.84											4									1
FALSE	High	Master Protein	A0A087ZYR9	UDPGT domain-containing protein OS=Apis mellifera OX=7460 GN=LOC408788 PE=3 SV=1		0	FALSE	136.919	42	18	317	18	544	62.7	9.01	56.88	31.72	84.76	9.06	8.58	21.49		86.08	4.85	2.55	39.28	5.3	57.37	1.77			1.85	356.86		0	13	7	13	7	4	9		14	3	1	12	3	8	2
FALSE	High	Master Protein	D3XL80	Uncharacterized protein (Fragment) OS=Apis mellifera OX=7460 PE=2 SV=1	Apis mellifera clone AMDH7651 hypothetical protein mRNA, partial cds	0	FALSE	17.299	14	4	10	4	426	48.2	5.91								6.09					3.8					11.92										2					2
FALSE	High	Master Protein	A0A088ATW9	Uncharacterized protein OS=Apis mellifera OX=7460 GN=100302106 PE=4 SV=1	Apis mellifera uncharacterized LOC100302106 (LOC100302106), transcript variant 1, mRNA	0	FALSE	24.51	7	6	26	6	1028	114.2	6.32	2.38		5.1	13.44		3.7		1.64	8.76	2.06	2.04				2.04						1		2	5		1		1	5	2	1
FALSE	High	Master Protein	A0A087ZMR4	Uncharacterized protein OS=Apis mellifera OX=7460 PE=4 SV=1		0	FALSE	12.762	28	2	7	2	88	9.6	9.19	3.03					0		0						0							2					2		1						1
FALSE	High	Master Protein	A0A087ZVL8	Uncharacterized protein OS=Apis mellifera OX=7460 GN=100576161 PE=4 SV=1	Uncharacterized protein OS=Apis mellifera OX=7460 GN=100576161 PE=4 SV=1	0	FALSE	27.238	12	7	24	7	908	102.8	5.17	0		10.74	0	6.08			5.25		3.12	6.24		1.69		2.97					0	2		3	1	4			2		3	3		1
FALSE	High	Master Protein	A0A087ZN03	Uncharacterized protein OS=Apis mellifera OX=7460 GN=LOC726759 PE=4 SV=1		0	FALSE	6.255	43	2	4	2	61	6.9	9.13			3.45	0					0														1	1					1
FALSE	High	Master Protein	A0A087ZN21	Uncharacterized protein OS=Apis mellifera OX=7460 GN=LOC408432 PE=3 SV=1		0	FALSE	4.88	3	1	1	1	425	49.2	8.29			2.63																				1
FALSE	High	Master Protein	A0A087ZNB9	Uncharacterized protein OS=Apis mellifera OX=7460 PE=4 SV=1		0	FALSE	8.872	44	1	4	1	89	9.5	8.1						2.31								0												1								1
FALSE	High	Master Protein	A0A088AGJ9	Uncharacterized protein OS=Apis mellifera OX=7460 GN=100576418 PE=4 SV=1	PREDICTED: Apis mellifera tetra-peptide repeat homeobox protein 1 (LOC100576418), mRNA	0	FALSE	21.873	31	8	14	8	271	31.5	6.65			3.69	2.36					4.77				1.97										2	2					7				1
FALSE	High	Master Protein	A0A087ZNF8	Uncharacterized protein OS=Apis mellifera OX=7460 GN=LOC552600 PE=4 SV=1	PREDICTED: Apis mellifera GILT-like protein 1 (LOC552600), mRNA	0	FALSE	8.905	17	2	4	2	206	23.1	7.06	1.85					1.67								2.29	2.26						1					1								1
FALSE	High	Master Protein	A0A088AHM1	Uncharacterized protein OS=Apis mellifera OX=7460 GN=100576945 PE=4 SV=1	PREDICTED: Apis mellifera uncharacterized LOC100576945 (LOC100576945), mRNA	0.001	FALSE	3.6	3	2	3	2	501	58.8	8.65			3.64								1.66												2								1
FALSE	High	Master Protein	A0A087ZNI0	Uncharacterized protein OS=Apis mellifera OX=7460 GN=CYP6AS10 PE=3 SV=1		0	FALSE	72.916	46	11	106	11	360	39.3	9.1	20.86	18.14	18			40.86	5.06	6.09		6.15	7.75	34.3		23.1	33.06		0	7.81	0		7	5	5			10	2	2		4	4	8		10
FALSE	High	Master Protein	A0A088AJX2	Uncharacterized protein OS=Apis mellifera OX=7460 GN=100577002 PE=3 SV=1	PREDICTED: Apis mellifera multiple inositol polyphosphate phosphatase 1 (LOC100577002), mRNA	0	FALSE	5.642	21	1	5	1	62	6.8	5.02	2.01		7	1.74																	1		1	1
FALSE	High	Master Protein	A0A087ZNI1	Uncharacterized protein OS=Apis mellifera OX=7460 PE=4 SV=1		0	FALSE	76.118	50	5	272	5	127	14.3	9.09	79.96	19.33	58.73	25.1	16.72	69.99	9.89	44.42		31.67	56.17	49.6	37.26	81.56	79.09	0	2.31	18.21	51.39	8.29	4	2	5	3	2	5	1	5		5	4	5	3	5
FALSE	High	Master Protein	A0A087ZNL6	Uncharacterized protein OS=Apis mellifera OX=7460 PE=3 SV=1		0	FALSE	27.37	52	6	17	6	133	15.5	8.88	2.6		18.51						2.01		4.38		8.71					0			2		6						1		2		3
FALSE	High	Master Protein	A0A087ZNP5	Uncharacterized protein OS=Apis mellifera OX=7460 PE=4 SV=1	PREDICTED: Apis mellifera 28S ribosomal protein S27, mitochondrial (LOC726673), mRNA	0.001	FALSE	3.054	10	1	8	1	93	10	5.01	0					3.5		1.64				0		3.68					1.8		1					1		1				1		1
FALSE	High	Master Protein	A0A087ZNU2	Uncharacterized protein OS=Apis mellifera OX=7460 GN=Ykt6 PE=3 SV=1	PREDICTED: Apis mellifera synaptobrevin homolog YKT6 (LOC552555), transcript variant X1, mRNA	0	FALSE	26.111	18	7	13	7	466	55.2	5.68	1.82		10.11					4.59					2.29						0		1		5					3					1
FALSE	High	Master Protein	A0A087ZNV0	Uncharacterized protein OS=Apis mellifera OX=7460 PE=4 SV=1		0	FALSE	33.254	10	6	247	6	474	54.4	9.64	40.36	27.56	35.05	32.91	20.54	42.68		17.18	8.73	27.63	38.16	25.36	13.92	38.54	34.13		1.92	0	3.34	1.88	6	5	6	6	3	6		4	3	4	6	5	2	6
FALSE	High	Master Protein	A0A088AG71	Uncharacterized protein OS=Apis mellifera OX=7460 GN=100577527 PE=4 SV=1	PREDICTED: Apis mellifera uncharacterized LOC100577527 (LOC100577527), mRNA	0	FALSE	35.563	34	5	25	5	160	16.9	8.69	2.4		30.66			0		0	5.67	4.97	14.61										1		4			1		1	3	2	3
FALSE	High	Master Protein	A0A087ZNV1	Uncharacterized protein OS=Apis mellifera OX=7460 PE=3 SV=1		0	FALSE	7.058	18	2	21	2	164	18.7	6.43	2.89		6.37	2.73	7.06	0		2.15	2.04	2.54	4.75		6.81	2.28	0						1		1	1	1	1		1	1	1	1		2	1
FALSE	High	Master Protein	A0A087ZNZ6	Uncharacterized protein OS=Apis mellifera OX=7460 GN=LOC551301 PE=3 SV=1		0.001	FALSE	3.239	7	1	2	1	171	19.5	7.62				0					2.01															1					1
FALSE	High	Master Protein	A0A087ZNZ9	Uncharacterized protein OS=Apis mellifera OX=7460 GN=Echs1 PE=3 SV=1		0	FALSE	86.725	62	7	1716	7	145	15.8	7.5	117.42	173.89	248.7	227.12	107.97	118.34	123.21	248.38	115.61	119.69	101.31	133.72	78.67	102.26	123.03	104.03	935.54	854.4	233.13	34.52	5	5	6	6	5	5	5	7	5	5	5	5	5	5
FALSE	High	Master Protein	A0A087ZP31	Uncharacterized protein OS=Apis mellifera OX=7460 PE=4 SV=1		0	FALSE	16.894	23	5	15	5	229	27	9.03			8.59						1.71	0	10.65		1.62										3						2	1	5		1
FALSE	High	Master Protein	A0A088ANF1	Uncharacterized protein OS=Apis mellifera OX=7460 GN=100578006 PE=4 SV=1	PREDICTED: Apis mellifera inorganic pyrophosphatase (LOC100578006), mRNA	0	FALSE	26.779	21	9	35	9	497	57.1	6.2	1.73		2.01	6.54		0			5.46	2.14	7.88		0	0							3		2	6		2			7	2	4		1	1
FALSE	High	Master Protein	A0A087ZP95	Uncharacterized protein OS=Apis mellifera OX=7460 GN=CPR6 PE=4 SV=1	Apis mellifera cuticular protein 6 (CPR6), mRNA	0	FALSE	5.79	12	1	3	1	196	21.9	9.95			0								2.69												1								1
FALSE	High	Master Protein	A0A087ZPP3	Uncharacterized protein OS=Apis mellifera OX=7460 PE=3 SV=1	Apis mellifera thioredoxin reductase 1 (Trxr-1), transcript variant 1, mRNA	0	FALSE	15.686	7	5	11	5	878	96.4	6.77	1.97					1.91		0						0	2.24						1					4		1						1
FALSE	High	Master Protein	A0A087ZPU7	Uncharacterized protein OS=Apis mellifera OX=7460 PE=4 SV=1		0	FALSE	19.811	26	6	14	6	246	28	9.06		1.99	5.24		1.95			8.98			4.2							2.75				1	2		1			5			2
FALSE	High	Master Protein	A0A087ZPU8	Uncharacterized protein OS=Apis mellifera OX=7460 PE=4 SV=1		0	FALSE	20.393	41	2	54	2	58	6.9	8.5	12.13		12.79	5.73	5.7	3.15	2.27	8	6.6	6.26	12.83		14.14	2.13	8.24					1.92	1		2	2	1	1	1	1	1	1	1		1	1
FALSE	High	Master Protein	A0A087ZQ22	Uncharacterized protein OS=Apis mellifera OX=7460 GN=sni PE=3 SV=1	PREDICTED: Apis mellifera C-factor (LOC724327), transcript variant X2, mRNA	0	FALSE	36.278	20	7	96	7	370	42.2	8.63	10.04		30.81	7.92	32.66	6.66		21.96	14.6	13.17	23.21		23.99		16.1	0		4.76	1.93	3.75	3		4	4	6	4		4	4	3	4		3
FALSE	High	Master Protein	A0A087ZQ27	Uncharacterized protein OS=Apis mellifera OX=7460 PE=3 SV=1		0	FALSE	23.792	17	2	278	2	134	15	10.52	18.14	11.41	51.66	5.56	98.08	45.58	4.2	201.39	44.69	16.59	30.4	1.85	65.02	9.05	19.04	48.02	5.99	98.36	3.71	8.15	1	2	2	1	2	2	1	2	2	2	2	1	2	1
FALSE	High	Master Protein	A0A087ZQ38	Uncharacterized protein OS=Apis mellifera OX=7460 GN=Tapdelta PE=4 SV=1		0	FALSE	5.032	5	1	13	1	223	24.6	8.84	4.72		2.77		4.62	4.94				2.56	2.35			1.96	5.37					0	1		1		1	1				1	1			1
FALSE	High	Master Protein	A0A088AUA5	Uncharacterized protein OS=Apis mellifera OX=7460 GN=100578782 PE=4 SV=1	PREDICTED: Apis mellifera cytochrome b-c1 complex subunit 9 (LOC100578782), transcript variant X2, mRNA	0	FALSE	17.244	2	6	6	6	4464	499.5	5.27		11.01	1.84																			5	1
FALSE	High	Master Protein	A0A087ZQ47	Uncharacterized protein OS=Apis mellifera OX=7460 GN=LOC413815 PE=3 SV=1	PREDICTED: Apis mellifera CCA tRNA nucleotidyltransferase 1, mitochondrial (LOC413815), mRNA	0	FALSE	13.86	11	2	13	2	152	17.8	7.49	2.06		8.72	4.66					10.55	2.45	4.05		2.18								1		1	1					2	1	1		1
FALSE	High	Master Protein	A0A087ZQ97	Uncharacterized protein OS=Apis mellifera OX=7460 GN=LOC726221 PE=4 SV=1		0	FALSE	28.085	40	7	21	6	206	23.1	5.68	2.4		8.07	1.64		4.18			2.21		11.7			1.8				6.73			1		3	4		2			1		4			1
FALSE	High	Master Protein	A0A087ZQI6	Uncharacterized protein OS=Apis mellifera OX=7460 GN=LOC411573 PE=3 SV=1	PREDICTED: Apis mellifera cell cycle control protein 50A (LOC411573), transcript variant X1, mRNA	0	FALSE	4.8	6	1	1	1	173	19.1	7.15			2.72																				1
FALSE	High	Master Protein	A0A087ZQJ6	Uncharacterized protein OS=Apis mellifera OX=7460 GN=RpL17 PE=3 SV=1		0	FALSE	22.929	20	4	22	4	261	30.6	10.99	1.68		9.68	6.65		0		1.93	2.6	1.96	3.45										1		3	2		1		1	2	1	4
FALSE	High	Master Protein	A0A088AVC5	Uncharacterized protein OS=Apis mellifera OX=7460 GN=102653862 PE=4 SV=1	PREDICTED: Apis mellifera NADH dehydrogenase [ubiquinone] 1 alpha subcomplex subunit 13 (LOC102653862), mRNA	0	FALSE	268.895	19	40	402	40	2870	314.4	4.97	46.11	20.45	54.62	123.94	29.87	25.43	14.43	111.18	55.43	134.41	25.03	39.43	20.92	17.15	0	0	42.9	9.32	2.13		12	5	13	28	6	10	5	22	23	32	7	10	6	4
FALSE	High	Master Protein	A0A087ZNY8	Uncharacterized protein OS=Apis mellifera OX=7460 GN=102654371 PE=4 SV=1	PREDICTED: Apis mellifera pro-resilin-like (LOC102654371), mRNA	0	FALSE	30.658	53	5	42	5	144	16.9	4.93		8.22	22.96		12.77		16.51	19.95		3.08	0		8.07		4.87							1	4		3		2	4		1	1		2
FALSE	High	Master Protein	A0A087ZX74	Uncharacterized protein OS=Apis mellifera OX=7460 GN=102654955 PE=4 SV=1	PREDICTED: Apis mellifera ATP synthase subunit b, mitochondrial (LOC102654955), mRNA	0	FALSE	32.287	43	4	12	4	174	18.6	9.29	24.94																	4.86			4
FALSE	High	Master Protein	A0A087ZQM4	Uncharacterized protein OS=Apis mellifera OX=7460 GN=LOC409927 PE=4 SV=1	PREDICTED: Apis mellifera putative pyridoxal-dependent decarboxylase domain-containing protein 2 (LOC409927), transcript variant X1, mRNA	0	FALSE	14.337	22	5	32	5	205	23.5	5.31		14.1		4.14			4.62		1.69			8.06	2.15				3.19	13.07				3		2			1		4			3	2
FALSE	High	Master Protein	A0A088A5E0	Uncharacterized protein OS=Apis mellifera OX=7460 GN=102656491 PE=4 SV=1	PREDICTED: Apis mellifera signal peptidase complex subunit 1 (LOC102656491), mRNA	0	FALSE	12.143	25	4	6	4	193	22.1	8.05											1.71		5.13				1.97	5.47													1		2
FALSE	High	Master Protein	A0A087ZR35	Uncharacterized protein OS=Apis mellifera OX=7460 GN=pita PE=4 SV=1		0	FALSE	8.887	18	3	6	3	266	30.3	8.97	0		3.44								0										1		3								1
FALSE	High	Master Protein	A0A088AN83	Uncharacterized protein OS=Apis mellifera OX=7460 GN=107964351 PE=4 SV=1	PREDICTED: Apis mellifera 60S ribosomal protein L7 (LOC107964351), mRNA	0	FALSE	12.37	11	1	18	1	132	15	10.14			8.78	10.56		0		0	5.74	8.14				0									1	1		1		1	1	1				1
FALSE	High	Master Protein	A0A087ZR93	Uncharacterized protein OS=Apis mellifera OX=7460 GN=726703 PE=4 SV=1	PREDICTED: Apis mellifera venom acid phosphatase Acph-1 (LOC726703), transcript variant X3, mRNA	0.002	FALSE	2.7	6	1	4	1	144	17.4	9.38			1.65								1.73												1								1
FALSE	High	Master Protein	A0A0B4J2M0	Uncharacterized protein OS=Apis mellifera OX=7460 GN=107964992 PE=4 SV=1	PREDICTED: Apis mellifera rho GDP-dissociation inhibitor 2 (LOC409741), transcript variant X1, mRNA	0.001	FALSE	3.154	2	1	5	1	410	45.3	6.8	0					1.94			2.09		1.83										1					1			1		1
FALSE	High	Master Protein	A0A087ZRF3	Uncharacterized protein OS=Apis mellifera OX=7460 PE=3 SV=1		0	FALSE	8.134	5	3	3	3	675	77.6	9.19						0					2.48							2.45								1					1
FALSE	High	Master Protein	A0A088AFE6	Uncharacterized protein OS=Apis mellifera OX=7460 GN=413959 PE=4 SV=1	PREDICTED: Apis mellifera multidrug resistance-associated protein 4 (LOC413959), mRNA	0	FALSE	12.097	21	3	11	3	154	17.3	10.42			4.25			1.62		0	4.23	2.58	1.9		1.81	0									2			1		1	2	1	1		1	1
FALSE	High	Master Protein	A0A087ZRI0	Uncharacterized protein OS=Apis mellifera OX=7460 GN=LOC551227 PE=4 SV=1	PREDICTED: Apis mellifera myb-like protein I (LOC551227), transcript variant X1, mRNA	0	FALSE	12.62	4	4	8	4	1170	131.2	8.46			4.12					2.45			0												2					3			1
FALSE	High	Master Protein	A0A087ZRK0	Uncharacterized protein OS=Apis mellifera OX=7460 GN=725217 PE=4 SV=1		0	FALSE	7.971	14	2	4	2	164	18.5	7.61	0			2.02											2.29				2.07		1			1
FALSE	High	Master Protein	A0A087ZSC2	Uncharacterized protein OS=Apis mellifera OX=7460 PE=4 SV=1		0	FALSE	15.823	34	4	19	4	142	16.2	9.44	2.11	2.19	2.26		0	0		2.13	0		2.31		8.11				2.77	7.26			3	1	1		1	1		2	1		1		2
FALSE	High	Master Protein	A0A087ZVG6	Uncharacterized protein OS=Apis mellifera OX=7460 GN=726030 PE=4 SV=1	PREDICTED: Apis mellifera transmembrane protein 214-A (LOC726030), mRNA	0	FALSE	31.944	24	9	20	9	629	70.1	8.44	0				1.7	5.3				0				1.74	0						1				1	9				2				1
FALSE	High	Master Protein	A0A087ZSC5	Uncharacterized protein OS=Apis mellifera OX=7460 GN=mRpS34 PE=4 SV=1		0	FALSE	5.999	26	1	8	1	58	6.8	10.17	2		9.85	2.27					5.07												1		1	1					1
FALSE	High	Master Protein	A0A087ZSD6	Uncharacterized protein OS=Apis mellifera OX=7460 PE=4 SV=1		0.002	FALSE	2.953	2	1	4	1	776	89.1	7.02									0		0		0		0														1		1		1
FALSE	High	Master Protein	A0A087ZSF5	Uncharacterized protein OS=Apis mellifera OX=7460 GN=LOC408477 PE=4 SV=1		0	FALSE	14.773	7	3	7	3	740	84.3	7.56	2.78		4.46						0		9.42										2		1						1		2
FALSE	High	Master Protein	A0A087ZSI4	Uncharacterized protein OS=Apis mellifera OX=7460 PE=4 SV=1	PREDICTED: Apis mellifera 28S ribosomal protein S22, mitochondrial (LOC726000), mRNA	0	FALSE	13.036	3	3	5	3	1246	144.3	7.05						0			6.21																	1			3
FALSE	High	Master Protein	A0A087ZSL8	Uncharacterized protein OS=Apis mellifera OX=7460 PE=4 SV=1		0.001	FALSE	3.344	3	1	1	1	439	51.6	7.25											2.62																				1
FALSE	High	Master Protein	A0A088ADS7	Uncharacterized protein OS=Apis mellifera OX=7460 GN=727483 PE=4 SV=1	PREDICTED: Apis mellifera protein stunted (LOC727483), transcript variant X1, mRNA	0	FALSE	18.972	18	2	12	2	186	21.6	9.52	3.27		10.94	2.25		0			3.64												2		2	1		2			2
FALSE	High	Master Protein	A0A087ZSS8	Uncharacterized protein OS=Apis mellifera OX=7460 GN=LOC413912 PE=4 SV=1		0	FALSE	98.04	31	16	74	16	661	74.3	8.51	7.08	2.08	75.64	0	5.79	0		12.86	1.64	6.37	16.38		27.01	0	1.61			2.12			3	1	15	2	2	1		6	3	3	7		7	1
FALSE	High	Master Protein	A0A087ZR95	Uncharacterized protein OS=Apis mellifera OX=7460 GN=Aats-gln PE=3 SV=1	PREDICTED: Apis mellifera probable glutamine--tRNA ligase (LOC413718), transcript variant X1, mRNA	0	FALSE	4.831	3	2	3	2	752	85.8	5.19															5.61
FALSE	High	Master Protein	A0A088AKB2	Uncharacterized protein OS=Apis mellifera OX=7460 GN=Aats-gly PE=4 SV=1	PREDICTED: Apis mellifera glycine--tRNA ligase (LOC408392), mRNA	0	FALSE	54.883	11	13	27	13	1585	176.6	5.27			27.93	1.62	4.98					14.97					1.84								10	1	2					8
FALSE	High	Master Protein	A0A088ANI3	Uncharacterized protein OS=Apis mellifera OX=7460 GN=Aats-ile PE=3 SV=1	PREDICTED: Apis mellifera isoleucine--tRNA ligase, cytoplasmic (LOC551629), mRNA	0	FALSE	7.865	9	1	16	1	140	16.4	8.68			9.52	0	4.32					16.91					4.39								1	1	1					1
FALSE	High	Master Protein	A0A087ZST6	Uncharacterized protein OS=Apis mellifera OX=7460 GN=LOC413724 PE=4 SV=1		0	FALSE	3.689	1	1	1	1	918	102.4	6.81											2.14																				1
FALSE	High	Master Protein	A0A087ZSY5	Uncharacterized protein OS=Apis mellifera OX=7460 PE=3 SV=1	PREDICTED: Apis mellifera nucleosome assembly protein 1-like 1 (LOC550824), transcript variant X2, mRNA	0	FALSE	53.211	65	3	117	3	77	7.7	10.43	59.54			1.61		1.98			0					6.23	4.3			130.23	58.49		3			1		1			1					3
FALSE	High	Master Protein	A0A087ZPU6	Uncharacterized protein OS=Apis mellifera OX=7460 GN=AIF PE=4 SV=1	PREDICTED: Apis mellifera apoptosis-inducing factor 1, mitochondrial (LOC412212), mRNA	0.001	FALSE	3.352	7	1	3	1	176	19.9	8.06						0								0												1								1
FALSE	High	Master Protein	A0A087ZT74	Uncharacterized protein OS=Apis mellifera OX=7460 GN=102654987 PE=4 SV=1	PREDICTED: Apis mellifera ras-related protein Rab-1A (LOC102654987), mRNA	0	FALSE	27.195	23	6	22	6	393	43.8	5.27		4.47	11	0	3.98		1.82	6.59	0				3.21		4.03		1.77	5.25	1.63			2	4	1	2		1	4	1				1
FALSE	High	Master Protein	A0A087ZTD8	Uncharacterized protein OS=Apis mellifera OX=7460 GN=LOC552441 PE=4 SV=1		0	FALSE	13.814	21	4	18	4	84	9.8	9.74			15.4	0					5.4	0									0				3	1					3	1
FALSE	High	Master Protein	A0A087ZTI9	Uncharacterized protein OS=Apis mellifera OX=7460 GN=LOC408567 PE=3 SV=1		0	FALSE	12.521	21	3	15	3	95	11	9.41			7.9	2.68					13.28	3.44													3	1					3	1
FALSE	High	Master Protein	A0A087ZTY7	Uncharacterized protein OS=Apis mellifera OX=7460 GN=Hsc70-5 PE=3 SV=1		0	FALSE	12.026	5	3	30	3	544	59.4	6.02	2.81		4.6	4.67	2.43	6.43		2.13	2.54	5.45	3.04	0	5.17	0	2.08	0		0			1		1	2	1	2		1	3	2	2	1	1	1
FALSE	High	Master Protein	A0A087ZPV6	Uncharacterized protein OS=Apis mellifera OX=7460 GN=ArrL3 PE=4 SV=1	PREDICTED: Apis mellifera arrestin domain-containing protein 17 (LOC724328), mRNA	0.002	FALSE	2.754	2	1	2	1	398	44.1	6.18				1.67					0															1					1
FALSE	High	Master Protein	A0A087ZU42	Uncharacterized protein OS=Apis mellifera OX=7460 GN=LOC411141 PE=4 SV=1	PREDICTED: Apis mellifera ATP-dependent Clp protease ATP-binding subunit clpX-like, mitochondrial (LOC411141), transcript variant X1, mRNA	0	FALSE	27.474	19	4	36	4	260	29.9	6.19	2.2		11.97	6.23	2.33	6.04			3.98	7.92	8.18		3.77	2.32	0	3.45					1		3	2	1	1			1	4	3		1	1
FALSE	High	Master Protein	A0A087ZU55	Uncharacterized protein OS=Apis mellifera OX=7460 PE=4 SV=1		0	FALSE	62.524	52	8	155	8	168	19.1	9.35	42.68		63.42	33.63	4.35	21.96		18.89	43	26.63	33.73		15.2	9.88	10.96	2.51		0	5.74	3.98	6		7	6	1	4		6	8	6	4		4	2
FALSE	High	Master Protein	A0A088AKM9	Uncharacterized protein OS=Apis mellifera OX=7460 GN=baf PE=4 SV=1	PREDICTED: Apis mellifera barrier-to-autointegration factor B (LOC551625), mRNA	0	FALSE	13.221	10	4	6	4	457	54.9	4.81				6.96																				4
FALSE	High	Master Protein	A0A088ASX2	Uncharacterized protein OS=Apis mellifera OX=7460 GN=bur PE=4 SV=1	PREDICTED: Apis mellifera GMP synthase [glutamine-hydrolyzing] (LOC409846), mRNA	0	FALSE	9.22	8	2	3	2	422	46.4	7.23						0								2.44												1								2
FALSE	High	Master Protein	A0A088AGP1	Uncharacterized protein OS=Apis mellifera OX=7460 GN=Cct5 PE=3 SV=1	PREDICTED: Apis mellifera T-complex protein 1 subunit epsilon (LOC409825), mRNA	0	FALSE	5.585	8	1	1	1	200	22.7	8.13				3.18																				1
FALSE	High	Master Protein	A0A087ZUB4	Uncharacterized protein OS=Apis mellifera OX=7460 PE=4 SV=1	PREDICTED: Apis mellifera putative aminopeptidase-2 (LOC409619), transcript variant X2, mRNA	0	FALSE	20.827	31	3	27	3	114	13.4	9	6.38	5.01	16.94	1.7	6.44		1.74	2.28	4.23	0	0										2	1	3	1	1		1	1	3	1	1
FALSE	High	Master Protein	A0A087ZS24	Uncharacterized protein OS=Apis mellifera OX=7460 GN=Clic PE=4 SV=1	PREDICTED: Apis mellifera chloride intracellular channel exc-4 (LOC408481), mRNA	0	FALSE	26.88	17	4	9	4	410	47	5.91			25.49																				4
FALSE	High	Master Protein	A0A087ZVP7	Uncharacterized protein OS=Apis mellifera OX=7460 GN=Cox4I1 PE=4 SV=1	PREDICTED: Apis mellifera cytochrome c oxidase subunit 4 isoform 1, mitochondrial (LOC412396), mRNA	0	FALSE	57.878	61	11	39	11	230	27.2	8.7	4.92		24.35			2.06			2.19		40.4										6		7			2			2		10
FALSE	High	Master Protein	A0A087ZZU9	Uncharacterized protein OS=Apis mellifera OX=7460 GN=Cox5a PE=4 SV=1	PREDICTED: Apis mellifera cytochrome c oxidase subunit 5A, mitochondrial (LOC408837), mRNA	0	FALSE	6.114	8	3	6	3	333	38.6	6.33											2.97		0	0			2.27	0													1		1	1
FALSE	High	Master Protein	A0A088A8C7	Uncharacterized protein OS=Apis mellifera OX=7460 GN=Cox5b PE=4 SV=1	PREDICTED: Apis mellifera cytochrome c oxidase subunit 5B, mitochondrial (LOC552610), mRNA	0	FALSE	26.182	29	8	20	8	326	35.7	9.29		10.47	7.82	2.1		0	3.25	20.12				2.59										3	3	1		1	1	6				1
FALSE	High	Master Protein	A0A087ZUH2	Uncharacterized protein OS=Apis mellifera OX=7460 GN=LOC412806 PE=4 SV=1		0	FALSE	24.225	25	4	12	4	259	29.1	5.06			15.71			0		8.87		2.86					2.95								4			1		2		1
FALSE	High	Master Protein	A0A087ZR01	Uncharacterized protein OS=Apis mellifera OX=7460 GN=Cpap3-c PE=4 SV=1	Apis mellifera cuticular protein analogous to peritrophins 3-C (Cpap3-c), mRNA	0	FALSE	28.538	7	7	10	7	1356	154.4	7.17			19.96						2.54														6						1
FALSE	High	Master Protein	A0A088AMM7	Uncharacterized protein OS=Apis mellifera OX=7460 GN=Cpap3-e PE=4 SV=1	PREDICTED: Apis mellifera cuticular protein analogous to peritrophins 3-E (LOC413679), mRNA	0	FALSE	13.069	37	2	10	2	71	8.2	8.16	2.29		8.45	4.51					7.58												1		2	1					2
FALSE	High	Master Protein	A0A088ABN3	Uncharacterized protein OS=Apis mellifera OX=7460 GN=CPR1 PE=4 SV=1	Apis mellifera cuticular protein 1 (CPR1), mRNA	0	FALSE	13.098	11	3	4	3	324	36.4	8.79			6.06								5.61												2								2
FALSE	High	Master Protein	A0A088A4U6	Uncharacterized protein OS=Apis mellifera OX=7460 GN=CPR17 PE=4 SV=1	Apis mellifera cuticular protein 17 (CPR17), mRNA	0	FALSE	27.029	72	7	49	7	149	16.8	4.22	1.69		11.74	10.03	9.68	1.92		4.72	3.39	17.23	2.12		22.53	0	7.3	0	5.9				1		2	3	2	2		2	2	4	2		4	1
FALSE	High	Master Protein	A0A088ABM3	Uncharacterized protein OS=Apis mellifera OX=7460 GN=CPR2 PE=4 SV=1	Apis mellifera cuticular protein 2 (CPR2), mRNA	0	FALSE	32.958	23	7	11	7	420	48.6	5.48		12.76	11.82									2.33										3	3									1
FALSE	High	Master Protein	A0A087ZUH7	Uncharacterized protein OS=Apis mellifera OX=7460 GN=LOC724749 PE=4 SV=1		0	FALSE	25.418	48	6	18	5	216	21.6	7.47	4.44		6.66			3.9				9.91				3.66	2.58						2		2			3				4				4
FALSE	High	Master Protein	A0A087ZUN1	Uncharacterized protein OS=Apis mellifera OX=7460 GN=LOC551437 PE=4 SV=1		0	FALSE	35.613	45	6	25	5	264	26.4	8.28	1.7		11.37	9.35		2.89		2.12		3.63				7.93	9.7				0		2		4	3		3		1		2				5
FALSE	High	Master Protein	A0A087ZUN4	Uncharacterized protein OS=Apis mellifera OX=7460 GN=100577132 PE=4 SV=1		0	FALSE	43.378	40	9	50	9	317	34.3	5.69	8.25		14.22	0	4.13	6.59		0		11.64	8.06			7.07	18.66		0		0		6		3	1	2	5		1		6	5			7
FALSE	High	Master Protein	A0A087ZUP7	Uncharacterized protein OS=Apis mellifera OX=7460 PE=3 SV=1	PREDICTED: Apis mellifera venom dipeptidyl peptidase 4-like (LOC411229), transcript variant X3, mRNA	0	FALSE	54.438	71	7	98	7	123	13.2	8.13	21.63		28.45	15.79	7.49	23.07		17.78		31.84	23.75	2.16	4.81	28.26	28.55	3.45			0	0	5		5	5	3	6		5		5	6	1	2	6
FALSE	High	Master Protein	A0A087ZPK0	Uncharacterized protein OS=Apis mellifera OX=7460 GN=Cryl1 PE=4 SV=1	Apis mellifera lambda crystallin-like protein (Cryl1), mRNA	0	FALSE	24.011	25	5	9	5	332	37.6	7.03	4.09					0					12.36										2					1					5
FALSE	High	Master Protein	A0A088A503	Uncharacterized protein OS=Apis mellifera OX=7460 GN=Cyc1 PE=4 SV=1	PREDICTED: Apis mellifera cytochrome c1, heme protein, mitochondrial (LOC413605), transcript variant X1, mRNA	0	FALSE	18.466	23	3	16	3	242	25.1	8.32	1.65	2.38	6.63			4.69		5.12		5.15		0		0	5.17						1	1	3			2		2		2		1		1
FALSE	High	Master Protein	A0A087ZUS6	Uncharacterized protein OS=Apis mellifera OX=7460 GN=LOC411317 PE=4 SV=1		0	FALSE	86.17	68	17	178	17	317	35.8	7.03	24.49	1.96	28.65	35.41	4.42	21.8	1.93	4.48	43.17	21.96	65.68		14.73	6.09	2.12	9.74	0	18.12	2.29		10	1	7	11	1	6	1	3	15	8	16		3	6
FALSE	High	Master Protein	A0A087ZUS7	Uncharacterized protein OS=Apis mellifera OX=7460 GN=LOC409002 PE=4 SV=1		0	FALSE	119.397	45	9	331	9	311	34.9	8.12	75.05	12.53	91.61	24.9	40.73	19.41	1.63	70.98	53.32	28.4	74.65	5.56	47.62	14.21	23.41	2.4	4.28	47.97	56.05	16.86	6	3	7	6	6	7	1	8	6	4	6	1	4	6
FALSE	High	Master Protein	A0A087ZUS8	Uncharacterized protein OS=Apis mellifera OX=7460 GN=100578625 PE=4 SV=1		0	FALSE	7.306	3	2	3	2	560	63.3	8.38	1.69													1.66							1													2
FALSE	High	Master Protein	A0A088AEJ9	Uncharacterized protein OS=Apis mellifera OX=7460 GN=CYP6AS4 PE=3 SV=1	PREDICTED: Apis mellifera probable cytochrome P450 6a17 (LOC412209), mRNA	0	FALSE	9.166	12	3	4	3	314	35.9	7.49			2.44	2.2					5.4														1	1					2
FALSE	High	Master Protein	A0A087ZXU5	Uncharacterized protein OS=Apis mellifera OX=7460 GN=CYP9Q1 PE=3 SV=1	PREDICTED: Apis mellifera cytochrome P450 9e2 (LOC410492), mRNA	0	FALSE	15.632	16	3	5	3	245	28	5.12		8.5						3.1											0			2						1
FALSE	High	Master Protein	A0A087ZXV8	Uncharacterized protein OS=Apis mellifera OX=7460 GN=CYP9Q2 PE=3 SV=1	PREDICTED: Apis mellifera cytochrome P450 9e2 (LOC408452), mRNA	0	FALSE	52.517	41	12	32	12	414	45.9	8.1	10.73		6.47	2.11		0			0		32.17					0					8		3	1		3			2		9
FALSE	High	Master Protein	A0A087ZV03	Uncharacterized protein OS=Apis mellifera OX=7460 GN=LOC412276 PE=4 SV=1	PREDICTED: Apis mellifera epimerase family protein SDR39U1 (LOC412276), mRNA	0	FALSE	10.274	9	3	3	3	501	58.6	9.16											2.32																				3
FALSE	High	Master Protein	A0A088A5J1	Uncharacterized protein OS=Apis mellifera OX=7460 GN=Droj2 PE=3 SV=1	PREDICTED: Apis mellifera dnaJ homolog subfamily A member 1 (LOC724368), transcript variant X1, mRNA	0	FALSE	19.269	7	3	15	3	663	52.7	9.01	8.4		0	2.56	0				4.23	2.23	2.21		2.36								2		1	3	1				2	1	1		1
FALSE	High	Master Protein	A0A087ZV14	Uncharacterized protein OS=Apis mellifera OX=7460 GN=LOC724583 PE=4 SV=1		0.001	FALSE	3.275	2	1	1	1	501	57.8	8.9			2.34																				1
FALSE	High	Master Protein	A0A087ZV41	Uncharacterized protein OS=Apis mellifera OX=7460 PE=4 SV=1		0	FALSE	144.165	67	29	182	29	510	58.8	8.72	3.52	1.71	31.55	15.08	1.72	11.94		5.87	16.15	12.58	89.05	0	4.05	9.74		7.43	9.8	110.04	1.81		6	1	8	9	1	5		4	8	5	22	1	1	9
FALSE	High	Master Protein	A0A088A6Z1	Uncharacterized protein OS=Apis mellifera OX=7460 GN=Ef1beta PE=4 SV=1	PREDICTED: Apis mellifera elongation factor 1-beta' (LOC552649), mRNA	0	FALSE	19.23	16	4	11	4	243	27.5	7.33	0		0								2.02		5.65					10.83	2.11		2		1								1		1
FALSE	High	Master Protein	A0A087ZV45	Uncharacterized protein OS=Apis mellifera OX=7460 PE=4 SV=1		0	FALSE	111.832	42	18	120	18	532	60.9	8.38	0	1.62	49.91	8.7		2.45		1.95	4.38	12.36	73.26		0	12.87	0	0	4.95	1.81	0		1	2	12	6		4		2	5	6	15		1	6
FALSE	High	Master Protein	A0A087ZV61	Uncharacterized protein OS=Apis mellifera OX=7460 PE=4 SV=1		0	FALSE	24.064	26	5	33	5	272	29.8	9.29	7.98		10.75	1.69	2.29	1.65			0	0	10.83			1.61							4		2	2	2	3			1	2	4			1
FALSE	High	Master Protein	A0A087ZV83	Uncharacterized protein OS=Apis mellifera OX=7460 PE=4 SV=1	PREDICTED: Apis mellifera serine/arginine repetitive matrix protein 1-like (LOC102656198), mRNA	0	FALSE	31.249	17	5	45	5	399	44.8	6.61	1.97	0	6.89	7.76		5.85		5.88	14.58	9.46	7.96		7.9	7.44				2.06			2	1	3	3		4		3	4	4	2		2	3
FALSE	High	Master Protein	A0A087ZV99	Uncharacterized protein OS=Apis mellifera OX=7460 GN=LOC551972 PE=4 SV=1	PREDICTED: Apis mellifera alpha-1,3/1,6-mannosyltransferase ALG2 (LOC551972), mRNA	0	FALSE	114.429	47	13	181	13	295	32.5	9.06	94.18		24.24	17.29		37.23			17.55	7.74	137.78		6.93	15.53		5.36		4.72	0		12		8	4		11			4	3	13		3	8
FALSE	High	Master Protein	A0A087ZVB1	Uncharacterized protein OS=Apis mellifera OX=7460 PE=4 SV=1		0	FALSE	10.57	18	3	7	3	217	24.6	4.79				2.12					4.8	2.31	1.82													1					3	2	1
FALSE	High	Master Protein	A0A087ZVB2	Uncharacterized protein OS=Apis mellifera OX=7460 PE=4 SV=1		0.001	FALSE	3.436	3	1	1	1	471	55	7.06											0																				1
FALSE	High	Master Protein	A0A087ZVD4	Uncharacterized protein OS=Apis mellifera OX=7460 GN=107964975 PE=4 SV=1	PREDICTED: Apis mellifera beta-1,3-glucan recognition protein 1 (B-gluc1), transcript variant X1, mRNA	0	FALSE	42.609	21	10	69	10	631	70.7	5.55	2.24		6.63	4.86	6.14	3.67		1.9	19.82	19.41	13		10.7	0	13.1	1.68	1.61	10.01			2		2	2	2	4		1	6	8	5		4	2
FALSE	High	Master Protein	A0A087ZVG7	Uncharacterized protein OS=Apis mellifera OX=7460 PE=4 SV=1	PREDICTED: Apis mellifera putative ATP-dependent RNA helicase DHX30 (LOC726077), mRNA	0	FALSE	19.299	9	5	5	5	644	71.2	6.99																		9.73
FALSE	High	Master Protein	A0A088AFL5	Uncharacterized protein OS=Apis mellifera OX=7460 GN=GstD1 PE=4 SV=1	Apis mellifera glutathione S-transferase D1 (GstD1), mRNA	0	FALSE	8.914	9	1	16	1	174	19.2	8.88	7.26		11.07	6.17		3.39		5.84	6.16		8.38			2.24	3.81						1		1	1		1		1	1		1			1
FALSE	High	Master Protein	A0A087ZVL9	Uncharacterized protein OS=Apis mellifera OX=7460 PE=4 SV=1		0	FALSE	35.457	42	7	36	7	240	27.6	7.88			15.64	9.24		3.62				6.6	16.02			1.69									4	5		2				3	6			4
FALSE	High	Master Protein	A0A087ZVS9	Uncharacterized protein OS=Apis mellifera OX=7460 GN=GstT1 PE=3 SV=1	PREDICTED: Apis mellifera glutathione S-transferase theta-3 (LOC552314), mRNA	0	FALSE	139.325	43	22	179	22	687	75.4	6.76	78.3		49.42	9.15		51.06			16.31	6.16	103.58			6.11		20.03					12		11	6		13			9	3	16			5
FALSE	High	Master Protein	A0A087ZVP9	Uncharacterized protein OS=Apis mellifera OX=7460 PE=4 SV=1		0.009	FALSE	2.276	6	1	1	1	217	24.8	7.77	0																				1
FALSE	High	Master Protein	A0A088ARD0	Uncharacterized protein OS=Apis mellifera OX=7460 GN=Hmt-1 PE=4 SV=1	PREDICTED: Apis mellifera ATP-binding cassette sub-family B member 6, mitochondrial (LOC726867), mRNA	0.001	FALSE	3.515	7	1	1	1	200	23.6	6.57			2.11																				1
FALSE	High	Master Protein	A0A087ZVV2	Uncharacterized protein OS=Apis mellifera OX=7460 GN=LOC725646 PE=3 SV=1	PREDICTED: Apis mellifera N-acetylneuraminate lyase (LOC725646), mRNA	0	FALSE	5.843	3	2	2	2	867	97.7	6.04											2.04																				2
FALSE	High	Master Protein	A0A088AGW8	Uncharacterized protein OS=Apis mellifera OX=7460 GN=Hsc70cb PE=4 SV=1	PREDICTED: Apis mellifera heat shock protein 70Cb ortholog (LOC408706), transcript variant X1, mRNA	0.001	FALSE	3.056	3	1	1	1	472	54.3	9.6											2.35																				1
FALSE	High	Master Protein	A0A087ZW63	Uncharacterized protein OS=Apis mellifera OX=7460 PE=4 SV=1		0	FALSE	174.447	42	26	92	26	778	87.2	6.51			186.97	21.95	11.42			7.39		10.89				0			1.66						26	10	7			3		5				1
FALSE	High	Master Protein	A0A088A0C7	Uncharacterized protein OS=Apis mellifera OX=7460 GN=IGFn3-7 PE=4 SV=1	PREDICTED: Apis mellifera neuroglian (LOC411829), transcript variant X2, mRNA	0	FALSE	12.142	8	3	8	3	424	45.8	5.5							0	2.24				2.86					0		1.63								1	2				1
FALSE	High	Master Protein	A0A088AHF2	Uncharacterized protein OS=Apis mellifera OX=7460 GN=LOC408284 PE=4 SV=1	PREDICTED: Apis mellifera mitochondrial import receptor subunit TOM40 homolog 1 (LOC408284), mRNA	0	FALSE	9.725	3	3	7	3	887	99.1	7.34			1.9	0					2.31	1.61					0								2	1					2	1
FALSE	High	Master Protein	A0A088AHJ0	Uncharacterized protein OS=Apis mellifera OX=7460 GN=LOC408291 PE=3 SV=1	PREDICTED: Apis mellifera 3-ketoacyl-CoA thiolase, mitochondrial (LOC408291), mRNA	0	FALSE	12.75	20	3	5	3	263	28.8	8.31				6.23														5.9						2
FALSE	High	Master Protein	A0A087ZW94	Uncharacterized protein OS=Apis mellifera OX=7460 PE=4 SV=1		0	FALSE	89.748	41	12	131	12	332	35.3	7.81	49.46	3.37	78.91	8.51	16.1	17.02		15.18	30.71	2.37	60.76		25.6	2.02	3.23		2.76	15.94	1.74	1.95	6	1	12	2	4	5		3	10	1	8		6	3
FALSE	High	Master Protein	A0A087ZW99	Uncharacterized protein OS=Apis mellifera OX=7460 GN=LOC726579 PE=4 SV=1	PREDICTED: Apis mellifera cleft lip and palate transmembrane protein 1-like protein (LOC726579), mRNA	0	FALSE	71.081	44	12	99	12	399	42.5	8.75	44.12	12.85	47.52	8.36	2.18	9.97			12.7	10.79	35.04		42.49	7.14				9.29			9	4	8	4	1	7			4	5	7		7	4
FALSE	High	Master Protein	A0A088A9D8	Uncharacterized protein OS=Apis mellifera OX=7460 GN=LOC408414 PE=3 SV=1	PREDICTED: Apis mellifera tropomyosin-1 (LOC408414), mRNA	0	FALSE	49.436	49	11	46	11	309	34	8.21		26.79		9.95					0				3.14				7.83	55.81				7		7					1				3
FALSE	High	Master Protein	A0A087ZWB8	Uncharacterized protein OS=Apis mellifera OX=7460 PE=3 SV=1		0	FALSE	27.942	17	7	51	7	432	49.2	9.26	10.4		27.33	0	3.83	0		2.33	7.09	4.43	18.46		1.69	2.21	1.76						4		6	1	2	3		1	3	2	5		1	2
FALSE	High	Master Protein	A0A087ZWD2	Uncharacterized protein OS=Apis mellifera OX=7460 GN=LOC409265 PE=4 SV=1		0	FALSE	8.608	6	2	2	2	515	58.2	8.5			4.16																				2
FALSE	High	Master Protein	A0A087ZWE7	Uncharacterized protein OS=Apis mellifera OX=7460 PE=4 SV=1		0.009	FALSE	2.308	2	1	1	1	539	61.3	7.27														0																				1
FALSE	High	Master Protein	A0A088AEV7	Uncharacterized protein OS=Apis mellifera OX=7460 GN=LOC408516 PE=4 SV=1	PREDICTED: Apis mellifera protein D2 (LOC408516), transcript variant X1, mRNA	0	FALSE	19.768	33	4	18	4	165	17.9	9.69	1.83		8.95	5.73		4.99			7.11	3.3											1		2	3		3			2	1
FALSE	High	Master Protein	A0A087ZWE8	Uncharacterized protein OS=Apis mellifera OX=7460 GN=100578976 PE=4 SV=1		0	FALSE	17.03	21	4	35	4	185	22.4	9.74	6.65		9.29	1.61		0		0	7.71		11.71		13.93								3		4	1		1		1	4		3		3
FALSE	High	Master Protein	A0A087ZWE9	Uncharacterized protein OS=Apis mellifera OX=7460 PE=4 SV=1	PREDICTED: Apis mellifera probable multidrug resistance-associated protein lethal(2)03659 (LOC410269), mRNA	0	FALSE	8.834	6	1	11	1	353	39.6	6.07	6.27		4.62			7.95		3.54			4.01			6.06	8.72						1		1			1		1			1			1
FALSE	High	Master Protein	A0A088AC16	Uncharacterized protein OS=Apis mellifera OX=7460 GN=LOC408608 PE=4 SV=1	PREDICTED: Apis mellifera uncharacterized LOC408608 (LOC408608), mRNA	0	FALSE	6.09	6	1	1	1	351	41.1	9.04											2.56																				1
FALSE	High	Master Protein	A0A087ZWJ0	Uncharacterized protein OS=Apis mellifera OX=7460 PE=4 SV=1	PREDICTED: Apis mellifera transmembrane protein 222 (LOC410283), mRNA	0.001	FALSE	3.805	2	1	1	1	648	73.1	9.19									2.07																				1
FALSE	High	Master Protein	A0A087ZWM1	Uncharacterized protein OS=Apis mellifera OX=7460 PE=4 SV=1		0	FALSE	90.451	45	16	97	16	417	46.5	8.31	29.92		48.76	0		10.05			7.54	1.7	90.31			7.04		0					10		10	1		3			5	2	14			7
FALSE	High	Master Protein	A0A088A015	Uncharacterized protein OS=Apis mellifera OX=7460 GN=LOC408851 PE=3 SV=1	PREDICTED: Apis mellifera putative cysteine proteinase CG12163 (LOC408851), transcript variant X1, mRNA	0	FALSE	6.848	5	2	2	2	537	59.6	8.53			2.33															2					1
FALSE	High	Master Protein	A0A088A9R3	Uncharacterized protein OS=Apis mellifera OX=7460 GN=LOC408904 PE=3 SV=1	PREDICTED: Apis mellifera non-specific lipid-transfer protein (LOC408904), mRNA	0	FALSE	41.332	70	6	90	6	97	10.9	4.72	23.43		11.43	12.02	7.54	23.48		6.83		8.19	15.09			21.28	27.49	12.5			9.67	2.48	3		2	3	2	5		3		3	4			5
FALSE	High	Master Protein	A0A087ZWN8	Uncharacterized protein OS=Apis mellifera OX=7460 PE=4 SV=1		0	FALSE	34.146	38	6	22	6	181	19.4	7.18	38.11								1.94						0						6								3
FALSE	High	Master Protein	A0A087ZWV6	Uncharacterized protein OS=Apis mellifera OX=7460 GN=727578 PE=4 SV=1		0	FALSE	6.623	6	2	6	2	409	47.2	8.54	0		2.74						0		2.1										1		1						1		2
FALSE	High	Master Protein	A0A088AV05	Uncharacterized protein OS=Apis mellifera OX=7460 GN=LOC409087 PE=4 SV=1	PREDICTED: Apis mellifera D-beta-hydroxybutyrate dehydrogenase, mitochondrial (LOC409087), transcript variant X1, mRNA	0	FALSE	8.004	2	3	3	3	1875	209.7	6.38			2.36															4.14					1
FALSE	High	Master Protein	A0A087ZX19	Uncharacterized protein OS=Apis mellifera OX=7460 GN=100578624 PE=3 SV=1		0	FALSE	23.409	36	6	48	6	190	22	4.88	2.39	4.87	10.04	4.74	7.01	4.35		6.83	2.32	7.02	6.96		15.45	0	4.7			5.81	0		1	1	2	4	2	2		2	1	2	2		4	2
FALSE	High	Master Protein	A0A087ZX94	Uncharacterized protein OS=Apis mellifera OX=7460 GN=LOC411483 PE=4 SV=1		0	FALSE	4.444	3	1	1	1	366	41.2	7.4	1.84																				1
FALSE	High	Master Protein	A0A087ZXC4	Uncharacterized protein OS=Apis mellifera OX=7460 GN=mRpS16 PE=3 SV=1		0.001	FALSE	3.104	5	1	2	1	214	23.7	6.68			2.25	0																			1	1
FALSE	High	Master Protein	A0A087ZXE3	Uncharacterized protein OS=Apis mellifera OX=7460 PE=4 SV=1		0	FALSE	3.942	3	1	6	1	339	36.3	9.85	2.17		0		2.27			2.1			2.7				1.84						1		1		1			1			1
FALSE	High	Master Protein	A0A088ART2	Uncharacterized protein OS=Apis mellifera OX=7460 GN=LOC409384 PE=3 SV=1	PREDICTED: Apis mellifera heat shock protein 60A (LOC409384), mRNA	0.001	FALSE	3.457	1	1	2	1	2319	262.2	6.47			0								0												1								1
FALSE	High	Master Protein	A0A087ZXG6	Uncharacterized protein OS=Apis mellifera OX=7460 GN=100577641 PE=4 SV=1	PREDICTED: Apis mellifera protein snakeskin (LOC100577641), mRNA	0	FALSE	5.212	1	2	5	2	2646	293.7	7.53				0		0			0	0	0													1		1			1	1	1
FALSE	High	Master Protein	A0A087ZXL3	Uncharacterized protein OS=Apis mellifera OX=7460 GN=LOC552424 PE=4 SV=1		0	FALSE	33.16	49	7	54	6	182	20.7	6.58	2.27	2.3	18.64	13.99	4.76	6.99		4.83	6.86	13.54	7.11		2	4.16	4.17	2.16	2.34	10.49			1	1	5	4	1	1		1	3	2	2		1	1
FALSE	High	Master Protein	A0A087ZXL8	Uncharacterized protein OS=Apis mellifera OX=7460 GN=LOC552361 PE=3 SV=1		0	FALSE	4.599	5	1	1	1	300	32.4	9.48	2.5																				1
FALSE	High	Master Protein	A0A087ZT28	Uncharacterized protein OS=Apis mellifera OX=7460 GN=LOC409529 PE=4 SV=1	PREDICTED: Apis mellifera ras-like protein 2 (LOC409529), transcript variant X1, mRNA	0	FALSE	51.378	35	10	40	10	408	44.6	8.53	10.75		4.04			1.83			0		37.88			0				0			6		3			4			1		9			1
FALSE	High	Master Protein	A0A088A2R3	Uncharacterized protein OS=Apis mellifera OX=7460 GN=LOC409586 PE=3 SV=1	PREDICTED: Apis mellifera NADH dehydrogenase [ubiquinone] 1 beta subcomplex subunit 9 (LOC409586), mRNA	0	FALSE	22.302	11	5	12	5	611	68.9	8.09			13.11	4.46					0		2.6												4	4					1		1
FALSE	High	Master Protein	A0A087ZVB3	Uncharacterized protein OS=Apis mellifera OX=7460 GN=LOC409602 PE=4 SV=1	PREDICTED: Apis mellifera circadian clock-controlled protein (LOC409602), mRNA	0	FALSE	4.717	3	1	2	1	391	44.6	5.64			1.81	2.05																			1	1
FALSE	High	Master Protein	A0A087ZXS1	Uncharacterized protein OS=Apis mellifera OX=7460 GN=100578392 PE=4 SV=1		0	FALSE	10.661	11	2	16	2	199	23	7.77	2.01		8.69	2.08	0	0		2.24	2.01	5.21	3.17			0			1.95				1		1	1	1	1		1	1	1	1			1
FALSE	High	Master Protein	A0A088AFJ0	Uncharacterized protein OS=Apis mellifera OX=7460 GN=LOC409712 PE=3 SV=1	PREDICTED: Apis mellifera short/branched chain specific acyl-CoA dehydrogenase, mitochondrial (LOC409712), mRNA	0	FALSE	43.319	20	8	112	8	492	56.2	8.65	15.79	2.42	13.94	0	18.56	3.23		13.81		11.92	23.67		24.9	2.37	4.29		4.06	33.66		0	6	2	4	3	6	3		7		5	6		6	3
FALSE	High	Master Protein	A0A088A5E4	Uncharacterized protein OS=Apis mellifera OX=7460 GN=LOC409739 PE=4 SV=1	PREDICTED: Apis mellifera motile sperm domain-containing protein 2 (LOC409739), mRNA	0	FALSE	124.27	73	15	198	15	160	19.5	7.33	31.22		118.18	21.01	12.73	14.7		34.37	55.66	27.4	53.11		49.69	1.6	0	0				1.98	10		13	6	3	7		9	11	7	10		9	2
FALSE	High	Master Protein	A0A087ZXS3	Uncharacterized protein OS=Apis mellifera OX=7460 GN=LOC727344 PE=4 SV=1		0	FALSE	42.117	49	8	44	8	145	17.4	9.42	0		24.65	1.7		0		0	22.08	8.19	7.34										2		7	3		1		1	7	5	4
FALSE	High	Master Protein	A0A087ZXU8	Uncharacterized protein OS=Apis mellifera OX=7460 PE=3 SV=1		0.001	FALSE	3.873	6	1	8	1	193	21.8	6.93			4.74	2.17						4.22	3.89												1	1						1	1
FALSE	High	Master Protein	A0A087ZY44	Uncharacterized protein OS=Apis mellifera OX=7460 GN=724708 PE=4 SV=1		0	FALSE	9.994	21	3	6	3	365	41.7	6.49				0		0			0							6.16								1		1			1
FALSE	High	Master Protein	A0A087ZWE0	Uncharacterized protein OS=Apis mellifera OX=7460 GN=LOC409870 PE=4 SV=1	PREDICTED: Apis mellifera minor histocompatibility antigen H13 (LOC409870), mRNA	0	FALSE	36.466	33	7	15	7	284	32.1	4.78			22.07	14.15					1.76														5	6					1
FALSE	High	Master Protein	A0A087ZY96	Uncharacterized protein OS=Apis mellifera OX=7460 PE=4 SV=1		0	FALSE	13.704	13	3	14	3	349	39.7	6.96	0		4.73								6.32										2		2								3
FALSE	High	Master Protein	A0A088AT65	Uncharacterized protein OS=Apis mellifera OX=7460 GN=LOC409905 PE=4 SV=1	PREDICTED: Apis mellifera 2-acylglycerol O-acyltransferase 1 (LOC409905), mRNA	0	FALSE	7.278	5	2	11	2	486	55	8.54	0		7.1						0		2.18		0	1.76							1		2						1		2		1	1
FALSE	High	Master Protein	A0A087ZYA3	Uncharacterized protein OS=Apis mellifera OX=7460 PE=3 SV=1		0.001	FALSE	3.12	3	1	4	1	373	41.6	6.79			1.78								3.47												1								1
FALSE	High	Master Protein	A0A087ZYB5	Uncharacterized protein OS=Apis mellifera OX=7460 PE=4 SV=1		0	FALSE	18.19	5	6	8	5	1291	147.5	8.35			15.69																				6
FALSE	High	Master Protein	A0A088AGT8	Uncharacterized protein OS=Apis mellifera OX=7460 GN=LOC409950 PE=4 SV=1	PREDICTED: Apis mellifera fibrillin-1 (LOC409950), mRNA	0	FALSE	206.415	38	17	860	17	409	46.3	6.14	172.69	35.38	134.03	159.56	167.55	113.98	14.99	144.73	68.66	179.37	69.05	34.32	69.63	80.7	247.1	6.66	6.58	15.1	65.37	58.07	15	8	14	14	15	14	5	15	12	15	13	7	13	12
FALSE	High	Master Protein	A0A087ZYC0	Uncharacterized protein OS=Apis mellifera OX=7460 GN=LOC727408 PE=4 SV=1		0	FALSE	9.25	9	3	3	3	348	40.4	9.52			5.11																				3
FALSE	High	Master Protein	A0A088A820	Uncharacterized protein OS=Apis mellifera OX=7460 GN=LOC410022 PE=3 SV=1	PREDICTED: Apis mellifera mitochondrial-processing peptidase subunit beta (LOC410022), mRNA	0	FALSE	27.006	15	3	52	3	280	30.2	5.31	11.82	0	29.58	14.48	8.37	7.02		11.01	13.75	3.62	5.67		10.11	2.12		0		3.3	0		2	1	3	3	1	1		2	2	2	2		2	1
FALSE	High	Master Protein	A0A087ZPT8	Uncharacterized protein OS=Apis mellifera OX=7460 GN=LOC410071 PE=3 SV=1	PREDICTED: Apis mellifera glycerol-3-phosphate phosphatase (LOC410071), mRNA	0	FALSE	9.424	15	2	5	2	232	23.9	8.95						0								2.42	6.25											1								2
FALSE	High	Master Protein	A0A087ZYF6	Uncharacterized protein OS=Apis mellifera OX=7460 GN=LOC413054 PE=4 SV=1		0.001	FALSE	3.918	2	1	1	1	797	87.1	5.83									0																				1
FALSE	High	Master Protein	A0A087ZYM0	Uncharacterized protein OS=Apis mellifera OX=7460 PE=4 SV=1		0	FALSE	57.306	64	5	75	5	121	14.3	9.79	9.31		47.29	16.29	3.9	6.56		4.5	45.86	23	14			2.05						1.66	3		4	4	1	2		1	5	5	2			1
FALSE	High	Master Protein	A0A088AHR3	Uncharacterized protein OS=Apis mellifera OX=7460 GN=LOC410218 PE=4 SV=1	PREDICTED: Apis mellifera probable signal peptidase complex subunit 2 (LOC410218), mRNA	0	FALSE	122.718	39	23	100	23	711	78.4	6.05	16.65		90.62	15.4		3.98			39.6		30.56		3.23	4.03	2.38	0					7		14	6		6			17		8		2	3
FALSE	High	Master Protein	A0A088A7D1	Uncharacterized protein OS=Apis mellifera OX=7460 GN=LOC410306 PE=3 SV=1	PREDICTED: Apis mellifera ADP-ribosylation factor 2 (LOC410306), mRNA	0	FALSE	42.614	10	6	43	6	1311	143.2	8.98	23.06	3.02	12.95	13.51	11.5	7.33	3.55	5.26		7.92				6.21	6.39			15.71	2.42		4	1	2	3	2	4	1	2		2				3
FALSE	High	Master Protein	A0A088A1M5	Uncharacterized protein OS=Apis mellifera OX=7460 GN=LOC410325 PE=3 SV=1	PREDICTED: Apis mellifera trifunctional enzyme subunit alpha, mitochondrial (LOC410325), mRNA	0	FALSE	29.265	13	7	9	7	654	73.7	5.31			24.02																				7
FALSE	High	Master Protein	A0A087ZYQ7	Uncharacterized protein OS=Apis mellifera OX=7460 GN=SCR-B9 PE=3 SV=1		0	FALSE	18.099	3	4	19	4	1625	180.2	5.35			6.37	0				0	0	4.24													4	1				1	4	4
FALSE	High	Master Protein	A0A087ZYV9	Uncharacterized protein OS=Apis mellifera OX=7460 GN=LOC726855 PE=4 SV=1		0	FALSE	222.331	62	23	397	23	477	53.3	5.53	95.84	12.09	196.62	65.8	33.77	41.24		58.06	111.66	78.39	84.11		71.73	20.22	23.21	10.1		4.58	4.81	0	17	5	20	14	11	13		12	20	15	13		9	8
FALSE	High	Master Protein	A0A087ZYW9	Uncharacterized protein OS=Apis mellifera OX=7460 GN=100578368 PE=4 SV=1		0	FALSE	6.094	10	2	5	2	307	34.1	5.27		0					0										4.91	2.46				1					1
FALSE	High	Master Protein	A0A087ZZ02	Uncharacterized protein OS=Apis mellifera OX=7460 GN=Aats-phe PE=4 SV=1	PREDICTED: Apis mellifera probable phenylalanine--tRNA ligase, mitochondrial (LOC413139), mRNA	0.003	FALSE	2.669	3	1	2	1	408	45.8	7.18									0					0															1					1
FALSE	High	Master Protein	A0A088AF49	Uncharacterized protein OS=Apis mellifera OX=7460 GN=LOC410617 PE=3 SV=1	PREDICTED: Apis mellifera cytochrome c oxidase assembly protein COX15 homolog (LOC410617), transcript variant X1, mRNA	0	FALSE	9.264	15	3	7	3	190	21.5	9.86			4.25	0				2.01	1.9	2.27	1.85												2	1				1	1	1	1
FALSE	High	Master Protein	A0A087ZZ12	Uncharacterized protein OS=Apis mellifera OX=7460 GN=Ppcs PE=4 SV=1		0	FALSE	30.127	33	5	38	5	192	21.3	6.18		15.84	23.64	6.67	12.61			10.39	2.09				22.27		2.19			4.58				3	3	3	3			3	3				4
FALSE	High	Master Protein	A0A087ZTT0	Uncharacterized protein OS=Apis mellifera OX=7460 GN=LOC410690 PE=4 SV=1	PREDICTED: Apis mellifera haloacid dehalogenase-like hydrolase domain-containing 5 (LOC410690), mRNA	0	FALSE	7.279	36	2	12	2	90	10.1	5.45	2.63	3.48	4.18					0			0	3.85	1.73					1.86			1	1	2					1			1	2	1
FALSE	High	Master Protein	A0A087ZZ23	Uncharacterized protein OS=Apis mellifera OX=7460 GN=mRpL4 PE=4 SV=1	PREDICTED: Apis mellifera 39S ribosomal protein L4, mitochondrial (LOC725062), mRNA	0	FALSE	31.359	26	3	44	2	180	20.4	7.37	2.27	2.3	20.07	11.87	4.76	6.99		4.83	4.98	16.12	4.85		2	4.16	4.17		2.34	7.69			1	1	3	1	1	1		1	1	2	1		1	1
FALSE	High	Master Protein	A0A087ZZ92	Uncharacterized protein OS=Apis mellifera OX=7460 GN=R PE=4 SV=1		0	FALSE	34.451	18	7	15	7	593	65.8	7.93		0	21.8		0												1.83					1	6		1
FALSE	High	Master Protein	A0A087ZZE0	Uncharacterized protein OS=Apis mellifera OX=7460 GN=LOC552000 PE=4 SV=1		0	FALSE	55.207	27	13	61	13	623	70.4	6.57	15.91	17.2		0		0	4.41				17.18		34.45	0			6.86	20.39			8	4		1		3	1				6		10	1
FALSE	High	Master Protein	A0A087ZZF3	Uncharacterized protein OS=Apis mellifera OX=7460 GN=Arp1 PE=3 SV=1		0	FALSE	60.447	20	11	97	1	640	70.3	5.82	7.61	38.7	19.46	27.35		7.67	4.64	2.26	8.97	3.02	10.13	1.88	16.08	1.98	3.5	0	13.95	31.7			2	7	7	7		2	1	1	9	3	5	1	5	3
FALSE	High	Master Protein	A0A088AVJ1	Uncharacterized protein OS=Apis mellifera OX=7460 GN=LOC410952 PE=3 SV=1	PREDICTED: Apis mellifera dehydrogenase/reductase SDR family protein 7-like (LOC410952), transcript variant X2, mRNA	0	FALSE	103.486	60	16	473	16	424	48.3	6.04	32.74	111.68	13.1	38.05	16.1	7.42	52.87	18.57	41.48	19.66	20.95	17.2	37.32	20.91	10.08	0	379.57	97.45	11.25		11	12	3	10	5	4	6	5	11	6	7	8	8	12
FALSE	High	Master Protein	A0A087ZZH2	Uncharacterized protein OS=Apis mellifera OX=7460 GN=Tf PE=4 SV=1	PREDICTED: Apis mellifera transcription elongation regulator 1 (LOC409045), transcript variant X3, mRNA	0	FALSE	12.04	11	3	3	3	394	44.2	7.77	4.68										2.67										2										1
FALSE	High	Master Protein	A0A087ZZP4	Uncharacterized protein OS=Apis mellifera OX=7460 GN=LOC412442 PE=3 SV=1		0	FALSE	39.77	23	8	38	8	478	55.2	7.09		35.24					1.79					9.31	2.1				35.63	6.35				5					1					4	1
FALSE	High	Master Protein	A0A087ZZT7	Uncharacterized protein OS=Apis mellifera OX=7460 GN=mRpS5 PE=4 SV=1	PREDICTED: Apis mellifera putative 28S ribosomal protein S5, mitochondrial (LOC411103), transcript variant X1, mRNA	0	FALSE	3.948	5	1	1	1	302	34.2	8.03									0																				1
FALSE	High	Master Protein	A0A088ASZ7	Uncharacterized protein OS=Apis mellifera OX=7460 GN=LOC411285 PE=4 SV=1	PREDICTED: Apis mellifera muscle LIM protein Mlp84B (LOC411285), transcript variant X3, mRNA	0.004	FALSE	2.494	8	1	1	1	202	22.3	5.73																	0
FALSE	High	Master Protein	A0A088AP17	Uncharacterized protein OS=Apis mellifera OX=7460 GN=LOC411295 PE=4 SV=1	PREDICTED: Apis mellifera V-type proton ATPase subunit D 1 (LOC411295), mRNA	0	FALSE	15.47	45	3	13	3	65	7.5	9.7	0		10.17						2.09		7.07		0								1		3						2		3		1
FALSE	High	Master Protein	A0A088A023	Uncharacterized protein OS=Apis mellifera OX=7460 GN=LOC412232 PE=4 SV=1		0	FALSE	14.544	7	4	7	1	728	82.2	9.42	2.46					0			0		7.77										1					1			1		3
FALSE	High	Master Protein	A0A088A065	Uncharacterized protein OS=Apis mellifera OX=7460 GN=100577702 PE=3 SV=1	PREDICTED: Apis mellifera 39S ribosomal protein L11, mitochondrial (LOC100577702), mRNA	0	FALSE	7.759	10	3	3	3	493	53.2	8.18									2.34																				3
FALSE	High	Master Protein	A0A088A0E6	Uncharacterized protein OS=Apis mellifera OX=7460 GN=LOC411105 PE=4 SV=1		0	FALSE	11.135	14	2	10	2	181	20.1	7.23								2.37				0	2.55	0	2.33		3.91	0										2				1	2	1
FALSE	High	Master Protein	A0A088A0F9	Uncharacterized protein OS=Apis mellifera OX=7460 GN=LOC726118 PE=4 SV=1		0	FALSE	3.7	2	1	1	1	768	86.9	6.7											0																				1
FALSE	High	Master Protein	A0A088A0H7	Uncharacterized protein OS=Apis mellifera OX=7460 PE=4 SV=1		0	FALSE	3.963	2	1	2	1	809	93.7	8.92			2.64			0																	1			1
FALSE	High	Master Protein	A0A088ADG3	Uncharacterized protein OS=Apis mellifera OX=7460 GN=LOC411730 PE=4 SV=1	PREDICTED: Apis mellifera mannosyl-oligosaccharide glucosidase GCS1 (LOC411730), mRNA	0	FALSE	5.872	2	2	2	2	1985	223	7.99						0			1.62																	1			1
FALSE	High	Master Protein	A0A088A108	Uncharacterized protein OS=Apis mellifera OX=7460 GN=LOC411863 PE=4 SV=1	PREDICTED: Apis mellifera dehydrogenase/reductase SDR family member 7 (LOC411863), mRNA	0	FALSE	5.022	6	1	1	1	360	40.9	6.21			3.4																				1
FALSE	High	Master Protein	A0A087ZV93	Uncharacterized protein OS=Apis mellifera OX=7460 GN=LOC411923 PE=3 SV=1	PREDICTED: Apis mellifera alanine--tRNA ligase, cytoplasmic (LOC411923), transcript variant X1, mRNA	0	FALSE	5.524	1	1	17	1	739	83	7.33	1.72		2.57	2.25		3.7		1.75	4.53	4.39	4.34		2.29	1.8	2.09						1		1	1		1		1	1	1	1		1	1
FALSE	High	Master Protein	A0A088AJJ6	Uncharacterized protein OS=Apis mellifera OX=7460 GN=LOC411989 PE=3 SV=1	PREDICTED: Apis mellifera eukaryotic initiation factor 4A-I (LOC411989), transcript variant X1, mRNA	0	FALSE	33.744	22	9	13	9	601	68.2	6.49			33.53																				9
FALSE	High	Master Protein	A0A088AQ15	Uncharacterized protein OS=Apis mellifera OX=7460 GN=LOC412111 PE=4 SV=1	PREDICTED: Apis mellifera vigilin (LOC412111), transcript variant X1, mRNA	0	FALSE	5.833	43	1	1	1	69	7.7	9.19																		3.99
FALSE	High	Master Protein	A0A088A0H9	Uncharacterized protein OS=Apis mellifera OX=7460 GN=LOC725550 PE=4 SV=1		0	FALSE	19.326	20	5	12	5	329	37.1	8.62	4.22		5.47			4.08					4.74		1.89	2.19				2.38			2		2			1					2		1	1
FALSE	High	Master Protein	A0A088A0P6	Uncharacterized protein OS=Apis mellifera OX=7460 GN=LOC551636 PE=4 SV=1	PREDICTED: Apis mellifera lanC-like protein 2 (LOC551636), transcript variant X1, mRNA	0.001	FALSE	2.998	5	1	1	1	169	18.4	9.16											2.2																				1
FALSE	High	Master Protein	A0A088A0P7	Uncharacterized protein OS=Apis mellifera OX=7460 GN=LOC725882 PE=4 SV=1		0	FALSE	6.242	2	2	5	2	790	90.1	6.92	0			0					0		2.68							1.78			1			1					1		1
FALSE	High	Master Protein	A0A088A0V7	Uncharacterized protein OS=Apis mellifera OX=7460 GN=tmod PE=4 SV=1		0	FALSE	13.288	11	2	4	2	298	33.8	7.71				2.48					2.36															1					2
FALSE	High	Master Protein	A0A088AT22	Uncharacterized protein OS=Apis mellifera OX=7460 GN=LOC412282 PE=3 SV=1	PREDICTED: Apis mellifera leucine--tRNA ligase, cytoplasmic (LOC412282), transcript variant X1, mRNA	0	FALSE	39.166	15	3	149	3	185	19.7	4.45	3.81	16.23	32.52			8.79	15.23	16.97		6.35		25.91			9.65		2.37		39.93		3	2	3			3	2	2		3		2
FALSE	High	Master Protein	A0A088A0Z1	Uncharacterized protein OS=Apis mellifera OX=7460 GN=LOC726151 PE=4 SV=1	PREDICTED: Apis cerana probable 39S ribosomal protein L49, mitochondrial (LOC107995797), mRNA	0	FALSE	4.689	12	2	2	2	297	33.3	9.06			2.65																				2
FALSE	High	Master Protein	A0A088A0Z6	Uncharacterized protein OS=Apis mellifera OX=7460 GN=LOC552843 PE=4 SV=1		0	FALSE	13.408	4	4	10	4	1181	136.7	8			1.92	0		0			0	0	1.94		2.03										1	1		1			2	1	3		1
FALSE	High	Master Protein	A0A088A111	Uncharacterized protein OS=Apis mellifera OX=7460 GN=mmy PE=4 SV=1	PREDICTED: Apis mellifera UDP-N-acetylhexosamine pyrophosphorylase (LOC551964), mRNA	0	FALSE	7.718	9	2	3	2	325	36.7	9.14			5.11								2.42												2								1
FALSE	High	Master Protein	A0A088ASE3	Uncharacterized protein OS=Apis mellifera OX=7460 GN=LOC412526 PE=3 SV=1	PREDICTED: Apis mellifera protein disulfide-isomerase A6 homolog (LOC412526), mRNA	0	FALSE	42.978	18	6	33	6	457	51.3	4.44		2.29	30.5	5.83	0		2.16		3.58	14.53		5.67					7.77					1	5	2	1		1		3	4		1
FALSE	High	Master Protein	A0A087ZZR1	Uncharacterized protein OS=Apis mellifera OX=7460 GN=LOC412543 PE=4 SV=1	Apis mellifera ligustica farnesoic acid O-methyltransferase (FAMet) mRNA, complete cds	0	FALSE	34.26	3	10	19	10	4361	499.9	6.67	1.67		23.91	0	4.25			1.8	3.54												2		9	1	2			1	3
FALSE	High	Master Protein	A0A088A179	Uncharacterized protein OS=Apis mellifera OX=7460 PE=4 SV=1	PREDICTED: Apis mellifera catenin delta-2 (LOC408311), transcript variant X4, mRNA	0	FALSE	34.572	20	7	33	7	427	47.2	5.26	12.97		10.43	0		5.84			0		1.64		15.54			0			0		5		3	3		5			3		1		4
FALSE	High	Master Protein	A0A088A1A5	Uncharacterized protein OS=Apis mellifera OX=7460 PE=4 SV=1	PREDICTED: Apis mellifera protein singed wings 2 (LOC100578716), transcript variant X2, mRNA	0	FALSE	54.952	21	6	70	6	447	49	5.34		21.02	36.1	9.09	26.13		4.19	31.85	0	7.53			13.33		16.47		0	5.61	0	2.12		3	6	4	4		2	6	3	3			2
FALSE	High	Master Protein	A0A088A1C7	Uncharacterized protein OS=Apis mellifera OX=7460 PE=4 SV=1	PREDICTED: Apis mellifera transcription termination factor 3, mitochondrial (LOC410339), mRNA	0	FALSE	4.614	3	2	3	2	721	83.6	6.64	0		4.79																		1		2
FALSE	High	Master Protein	A0A087ZPB7	Uncharacterized protein OS=Apis mellifera OX=7460 GN=LOC412864 PE=4 SV=1	PREDICTED: Apis mellifera FUN14 domain-containing protein 1 (LOC412864), transcript variant X3, mRNA	0	FALSE	41.863	15	8	28	8	773	88.2	8.65			31.94	0	3.89			1.96	6.94	1.84													7	2	2			1	6	2
FALSE	High	Master Protein	A0A088A1C8	Uncharacterized protein OS=Apis mellifera OX=7460 GN=LOC727012 PE=4 SV=1	PREDICTED: Apis mellifera reactive oxygen species modulator 1 (LOC727012), mRNA	0	FALSE	63.867	45	12	83	12	329	36.3	9.39	9.19		66.11	7.7		2.52			19.93	2.12	20.15		0			1.61					7		10	7		5			11	5	8		1
FALSE	High	Master Protein	A0A088A1F9	Uncharacterized protein OS=Apis mellifera OX=7460 PE=4 SV=1		0.006	FALSE	2.426	8	1	3	1	140	15	9.91											1.89					0			0												1
FALSE	High	Master Protein	A0A088A1L3	Uncharacterized protein OS=Apis mellifera OX=7460 GN=LOC408349 PE=3 SV=1		0	FALSE	28.544	17	6	11	6	529	61.4	8	0		25.86																		1		6
FALSE	High	Master Protein	A0A087ZQ67	Uncharacterized protein OS=Apis mellifera OX=7460 GN=LOC413128 PE=4 SV=1	PREDICTED: Apis mellifera putative ferric-chelate reductase 1 homolog (LOC413128), transcript variant X1, mRNA	0	FALSE	140.647	67	19	200	19	238	27.8	7.43	14.71		165.26	27.24	2.11	4.13		1.93	82.02	19.56	80.84		17.7	0				4.31			5		16	7	1	4		1	15	4	15		6	3
FALSE	High	Master Protein	A0A088A9C2	Uncharacterized protein OS=Apis mellifera OX=7460 GN=LOC413354 PE=4 SV=1	PREDICTED: Apis mellifera integrin-linked protein kinase homolog pat-4 (LOC413354), mRNA	0	FALSE	16.256	27	3	12	3	96	10.8	7.77			14.02			6.46			3.92						0								3			3			3
FALSE	High	Master Protein	A0A088AK13	Uncharacterized protein OS=Apis mellifera OX=7460 GN=LOC413394 PE=3 SV=1	PREDICTED: Apis mellifera vesicle-trafficking protein SEC22b-B (LOC413394), mRNA	0.007	FALSE	2.347	3	1	1	1	280	33.3	9.63			0																				1
FALSE	High	Master Protein	A0A088A1S8	Uncharacterized protein OS=Apis mellifera OX=7460 PE=3 SV=1		0	FALSE	59.756	18	17	40	17	1314	146.4	6.7		3.66	5.25			5.08					3.27	11.81		5.36	19.05							2	3			5					2	8		7
FALSE	High	Master Protein	A0A088A1Z5	Uncharacterized protein OS=Apis mellifera OX=7460 GN=ABC10 PE=4 SV=1	PREDICTED: Apis mellifera ATP-binding cassette sub-family B member 10, mitochondrial (LOC552744), mRNA	0	FALSE	15.575	12	5	14	5	623	69.2	7.01	0		2.38		2.03			2.18			1.66	0	5.58		0			2.04	0		1		2		1			2			2	1	1
FALSE	High	Master Protein	A0A088A0G9	Uncharacterized protein OS=Apis mellifera OX=7460 GN=LOC413762 PE=4 SV=1	PREDICTED: Apis mellifera complement component 1 Q subcomponent-binding protein, mitochondrial (LOC413762), mRNA	0	FALSE	7.149	7	2	4	2	361	40.4	8.43			7.33										2.51										2										1
FALSE	High	Master Protein	A0A088A221	Uncharacterized protein OS=Apis mellifera OX=7460 PE=4 SV=1		0	FALSE	17.092	20	4	8	4	338	37.5	9.99	1.92		2.46								2.53										1		2								3
FALSE	High	Master Protein	A0A087ZX60	Uncharacterized protein OS=Apis mellifera OX=7460 GN=LOC413869 PE=4 SV=1	PREDICTED: Apis mellifera retinol dehydrogenase 11 (LOC413869), mRNA	0	FALSE	142.413	60	21	119	21	539	59	8.47	32.31		99.55	0		7.08			4.33	2.54	66.56		2.62	8.53		2.47		10.44			13		18	1		10			4	1	17		1	5
FALSE	High	Master Protein	A0A088A241	Uncharacterized protein OS=Apis mellifera OX=7460 GN=LOC409494 PE=3 SV=1		0	FALSE	45.39	45	9	63	9	267	29.9	4.98	23.49		6.84	5.69		12.34			1.83	9.63	33.06		8.93			5.08		2.13			5		3	6		5			2	3	7		2
FALSE	High	Master Protein	A0A088APV9	Uncharacterized protein OS=Apis mellifera OX=7460 GN=LOC413997 PE=4 SV=1	PREDICTED: Apis mellifera translocator protein (LOC413997), mRNA	0.001	FALSE	3.214	6	1	1	1	299	35	9.5			3.04																				1
FALSE	High	Master Protein	A0A088AD67	Uncharacterized protein OS=Apis mellifera OX=7460 GN=LOC414035 PE=4 SV=1	PREDICTED: Apis mellifera lachesin (LOC414035), transcript variant X1, mRNA	0	FALSE	24.809	11	4	11	4	551	65	9.01	0		4.82								5.65										2		3								3
FALSE	High	Master Protein	A0A088ARI3	Uncharacterized protein OS=Apis mellifera OX=7460 GN=LOC550885 PE=4 SV=1	PREDICTED: Apis mellifera nicotinate phosphoribosyltransferase (LOC550885), transcript variant X1, mRNA	0	FALSE	463.342	41	56	1369	54	1412	162.6	5.83	113.07	0	436.49	373.72	228.39	212.32		114.87	338.28	363.89	202.76		152.51	127.98	117.82	36.91	7.56	2.79	5.48	21.21	31	1	49	47	30	43		29	49	50	35		28	37
FALSE	High	Master Protein	A0A088AVL8	Uncharacterized protein OS=Apis mellifera OX=7460 GN=LOC551042 PE=3 SV=1	PREDICTED: Apis mellifera NADH dehydrogenase [ubiquinone] 1 alpha subcomplex subunit 6 (LOC551042), mRNA	0	FALSE	4.921	14	2	4	2	185	21.1	8.41								0			0		0					1.95										1			1		1
FALSE	High	Master Protein	A0A088A215	Uncharacterized protein OS=Apis mellifera OX=7460 GN=LOC551061 PE=4 SV=1	PREDICTED: Apis mellifera multidrug resistance-associated protein 4 (LOC551061), transcript variant X2, mRNA	0	FALSE	8.283	10	2	2	2	213	24.7	9.07																		4.5
FALSE	High	Master Protein	A0A088A279	Uncharacterized protein OS=Apis mellifera OX=7460 PE=4 SV=1		0	FALSE	6.979	10	3	3	3	438	51.8	9.01			0								1.89												1								2
FALSE	High	Master Protein	A0A088ACK4	Uncharacterized protein OS=Apis mellifera OX=7460 GN=LOC551125 PE=3 SV=1	PREDICTED: Apis mellifera 40S ribosomal protein S15Aa (LOC551125), mRNA	0	FALSE	5.369	10	1	2	1	280	32.7	9.57			2.21								2.08												1								1
FALSE	High	Master Protein	A0A088AUI4	Uncharacterized protein OS=Apis mellifera OX=7460 GN=LOC551167 PE=4 SV=1	PREDICTED: Apis mellifera multidrug resistance protein homolog 49 (LOC551167), transcript variant X1, mRNA	0	FALSE	11.748	26	1	23	1	81	9.3	10.43	11.5		9.59	7.88	4.39	3.79		6.93	7.89	3.59	8.76		9.77	3.57	8.46						1		1	1	1	1		1	1	1	1		1	1
FALSE	High	Master Protein	A0A088A2A5	Uncharacterized protein OS=Apis mellifera OX=7460 GN=LOC552272 PE=3 SV=1		0	FALSE	5.053	6	2	2	2	326	36.7	9.23			2.38																				2
FALSE	High	Master Protein	A0A088AM39	Uncharacterized protein OS=Apis mellifera OX=7460 GN=LOC551189 PE=3 SV=1	PREDICTED: Apis mellifera farnesyl pyrophosphate synthase (LOC551189), transcript variant X4, mRNA	0	FALSE	8.968	15	4	6	4	318	37.8	8.56	1.66										3.64										2										3
FALSE	High	Master Protein	A0A088A224	Uncharacterized protein OS=Apis mellifera OX=7460 GN=LOC551211 PE=4 SV=1	PREDICTED: Apis mellifera elongation factor 1-gamma (LOC551211), mRNA	0.001	FALSE	3.184	2	1	6	1	426	47.8	8.66	0		2.1		1.61				0		2.11		2.02								1		1		1				1		1		1
FALSE	High	Master Protein	A0A088A2A9	Uncharacterized protein OS=Apis mellifera OX=7460 PE=4 SV=1		0	FALSE	14.24	5	4	6	4	980	109.1	9.09				0					0															1					4
FALSE	High	Master Protein	A0A088A2F7	Uncharacterized protein OS=Apis mellifera OX=7460 GN=LOC552419 PE=4 SV=1		0	FALSE	33.06	28	4	45	4	171	19.5	9.26	2.23		25.5			4.25		0	2.28		21.07		12.88							0	2		4			3		1	3		4		3
FALSE	High	Master Protein	A0A088ACE3	Uncharacterized protein OS=Apis mellifera OX=7460 GN=LOC551291 PE=4 SV=1	PREDICTED: Apis mellifera spectrin alpha chain (LOC551291), transcript variant X2, mRNA	0	FALSE	8.71	14	3	4	3	274	32.8	9.35	0										4.77										1										3
FALSE	High	Master Protein	A0A088A2I0	Uncharacterized protein OS=Apis mellifera OX=7460 PE=4 SV=1		0.002	FALSE	2.894	5	1	1	1	363	40.8	7.66	0																				1
FALSE	High	Master Protein	A0A088A2R7	Uncharacterized protein OS=Apis mellifera OX=7460 GN=727210 PE=3 SV=1		0	FALSE	24.541	54	5	31	5	122	14.4	9.67	1.9		16.55	2.06		0		0	7.8	0	6.11		0								3		5	2		1		1	5	1	3		1
FALSE	High	Master Protein	A0A088A892	Uncharacterized protein OS=Apis mellifera OX=7460 GN=LOC551436 PE=3 SV=1	PREDICTED: Apis mellifera T-complex protein 1 subunit theta (LOC551436), mRNA	0	FALSE	13.246	23	4	6	4	229	26.5	10.02	1.95		9.75								1.79										1		4								1
FALSE	High	Master Protein	A0A088A2Z6	Uncharacterized protein OS=Apis mellifera OX=7460 GN=LOC726990 PE=4 SV=1		0	FALSE	119.873	22	25	50	23	1392	156.8	8.57			109.42			0					0			0									25			1					1			2
FALSE	High	Master Protein	A0A088A2Z8	Uncharacterized protein OS=Apis mellifera OX=7460 GN=mRpL17 PE=4 SV=1		0	FALSE	275.119	77	36	307	36	616	68.3	5.43	6.06		300.95	85.01	2.21	30.87		14.07	21.15	88.78	7.14		2.02	27.06	14.82	5.28	2.23	0	3.64		4		35	25	1	14		6	16	20	3		1	16
FALSE	High	Master Protein	A0A088A315	Uncharacterized protein OS=Apis mellifera OX=7460 PE=4 SV=1	PREDICTED: Apis mellifera glutathione hydrolase 1 proenzyme (LOC410096), transcript variant X2, mRNA	0	FALSE	22.345	30	5	32	5	130	14.8	10.05	5.58		6.42	5.37		4.37		0	2.17	6.25	5.18			1.85	0						2		3	2		3		1	2	2	3			2
FALSE	High	Master Protein	A0A088A371	Uncharacterized protein OS=Apis mellifera OX=7460 GN=LOC726569 PE=4 SV=1		0	FALSE	103.258	24	25	47	25	1343	147.3	7.64			87.77	5.46					10.2	2.6													25	3					4	2
FALSE	High	Master Protein	A0A088A375	Uncharacterized protein OS=Apis mellifera OX=7460 GN=LOC410098 PE=4 SV=1	PREDICTED: Apis mellifera WD repeat and FYVE domain-containing protein 2 (LOC410098), mRNA	0	FALSE	291.923	85	29	701	10	376	41.8	5.48	148.2	8.5	247.84	142.72	16.11	86.44	2.1	30.99	75.17	105.08	79.17	8.48	36.9	44.76	41.68	382	29.6	22.2	25.24	12.39	19	3	18	18	5	14	1	9	15	14	10	4	7	12
FALSE	High	Master Protein	A0A088A394	Uncharacterized protein OS=Apis mellifera OX=7460 PE=3 SV=1		0	FALSE	25.567	13	5	11	5	425	49	6.33		1.74		5.09					4.49									14.18				1		2					2
FALSE	High	Master Protein	A0A088AVE9	Uncharacterized protein OS=Apis mellifera OX=7460 GN=LOC551660 PE=4 SV=1	PREDICTED: Apis mellifera NADH dehydrogenase [ubiquinone] 1 beta subcomplex subunit 8, mitochondrial (LOC551660), mRNA	0	FALSE	20.264	12	5	8	5	554	63.8	7.03		2.46																10.38				1
FALSE	High	Master Protein	A0A088A3A5	Uncharacterized protein OS=Apis mellifera OX=7460 GN=CYP6AS15 PE=3 SV=1	PREDICTED: Apis mellifera probable cytochrome P450 6a13 (LOC551197), mRNA	0	FALSE	64.532	8	17	52	17	2433	280	5.26		4.8	37.76	3.8		4.61		2.37	9.62	2.2	5.37	2.52	6.22	2.18								1	12	5		2		1	7	2	2	1	1	2
FALSE	High	Master Protein	A0A088ANE5	Uncharacterized protein OS=Apis mellifera OX=7460 GN=LOC551775 PE=3 SV=1	PREDICTED: Apis mellifera trifunctional enzyme subunit beta, mitochondrial (LOC551775), mRNA	0.003	FALSE	2.538	3	1	3	1	469	52	5.41													6.1					2.47															1
FALSE	High	Master Protein	A0A088A3F4	Uncharacterized protein OS=Apis mellifera OX=7460 GN=727045 PE=4 SV=1	Apis mellifera major royal jelly protein 3 (Mrjp3), mRNA	0	FALSE	10.029	6	2	5	2	368	41.6	9.85			9.74																				2
FALSE	High	Master Protein	A0A088A7R3	Uncharacterized protein OS=Apis mellifera OX=7460 GN=LOC551843 PE=4 SV=1	PREDICTED: Apis mellifera mitochondrial proton/calcium exchanger protein (LOC551843), mRNA	0	FALSE	50.076	65	7	109	7	121	14.6	7.3	12.55		37.01	21.23	19.74	5.2		11.22	27.66	21.48	11.85		19.15	4.98	3.46	0		1.66	1.61	0	4		6	5	4	3		6	7	5	4		6	2
FALSE	High	Master Protein	A0A088A3I9	Uncharacterized protein OS=Apis mellifera OX=7460 GN=LOC409755 PE=4 SV=1		0	FALSE	13.902	22	4	9	4	109	12.9	9.55	0		10.53						3.68		0										1		3						2		1
FALSE	High	Master Protein	A0A088A3L2	Uncharacterized protein OS=Apis mellifera OX=7460 GN=LOC410729 PE=4 SV=1	PREDICTED: Apis mellifera putative serine protease K12H4.7 (LOC410729), mRNA	0	FALSE	4.338	3	1	1	1	544	59.1	5.91									1.91																				1
FALSE	High	Master Protein	A0A088A3M1	Uncharacterized protein OS=Apis mellifera OX=7460 GN=LOC410115 PE=3 SV=1		0.002	FALSE	2.741	1	1	2	1	773	90.3	8.07																	2.1
FALSE	High	Master Protein	A0A088A3P3	Uncharacterized protein OS=Apis mellifera OX=7460 GN=mRpL38 PE=4 SV=1		0	FALSE	5.533	12	2	13	2	187	20.3	5.91	0	0	2.02		0	0		1.76			0		3.42								1	1	2		1	1		1			1		1
FALSE	High	Master Protein	A0A088A3S4	Uncharacterized protein OS=Apis mellifera OX=7460 PE=4 SV=1	PREDICTED: Apis mellifera organic cation transporter protein (LOC726688), mRNA	0	FALSE	114.473	48	12	275	12	408	46.6	6.87	24.31	87.47	4.68	90.24	68.46	14.89	38.22	32.23	65.5	36.61	26.05	42.77	22.62	38.25	4.48		203.1	42.98	0	2.5	4	7	1	9	11	3	5	5	8	9	6	4	6	6
FALSE	High	Master Protein	A0A088A3U0	Uncharacterized protein OS=Apis mellifera OX=7460 GN=LOC408564 PE=4 SV=1		0	FALSE	5.41	6	1	2	1	253	30	8.21											1.86							2.75													1
FALSE	High	Master Protein	A0A087ZPS2	Uncharacterized protein OS=Apis mellifera OX=7460 GN=LOC552206 PE=3 SV=1	PREDICTED: Apis mellifera putative ATP-dependent RNA helicase me31b (LOC552206), transcript variant X1, mRNA	0	FALSE	69.186	53	15	268	15	216	24.4	7.43	1.88	56.98		7.12	3.68	2.1	28.5		3.96	6.49	8.86	42.81	6.42	10.48	4.58		284.67	21.15	3.57		3	12		3	2	1	7		3	3	3	11	3	5
FALSE	High	Master Protein	A0A088A3W3	Uncharacterized protein OS=Apis mellifera OX=7460 PE=4 SV=1	PREDICTED: Apis mellifera ankyrin repeat domain-containing protein 39 (LOC414036), transcript variant X3, mRNA	0	FALSE	31.098	23	3	50	3	118	13.7	10.24	8.91		34.13	8.78		6.79		6.1	16.93	7.7	10.1	1.75	2.04	2.54	4.46				0	0	2		3	3		2		2	3	2	3	1	1	2
FALSE	High	Master Protein	A0A088A4F9	Uncharacterized protein OS=Apis mellifera OX=7460 GN=100577418 PE=4 SV=1		0	FALSE	119.106	59	21	150	21	466	50.9	9.54	59.73		97.06	11.51		15.52		2.15	22.98	2.71	79.84		2.11	1.66		1.7			0		16		16	5		12		1	8	3	17		1	3
FALSE	High	Master Protein	A0A088A4S2	Uncharacterized protein OS=Apis mellifera OX=7460 GN=LOC551524 PE=4 SV=1	PREDICTED: Apis mellifera zinc carboxypeptidase (LOC551524), mRNA	0	FALSE	45.064	14	8	21	8	773	88.8	8.4	2.46		43.71			1.69			1.95		5.13										1		8			1			2		2
FALSE	High	Master Protein	A0A088A4U8	Uncharacterized protein OS=Apis mellifera OX=7460 PE=4 SV=1		0.004	FALSE	2.513	4	1	1	1	407	46.6	6.99											1.66																				1
FALSE	High	Master Protein	A0A088A4Z4	Uncharacterized protein OS=Apis mellifera OX=7460 GN=IGFn3-12 PE=4 SV=1		0	FALSE	62.151	51	14	72	14	292	32.2	9.63	15.57		57.33		3.8	0			8.38	0	39.66		1.8	0							7		12		2	1			8	2	10		1	2
FALSE	High	Master Protein	A0A088A500	Uncharacterized protein OS=Apis mellifera OX=7460 PE=3 SV=1		0	FALSE	9.208	21	5	8	5	258	29.5	7.75	0		2.21			0				0	0			0	0						1		1			1				1	1			1
FALSE	High	Master Protein	A0A088A525	Uncharacterized protein OS=Apis mellifera OX=7460 GN=mRpS12 PE=3 SV=1	PREDICTED: Apis mellifera 40S ribosomal protein S12, mitochondrial (LOC409723), mRNA	0	FALSE	4.178	3	1	1	1	444	50.6	7.74						0																				1
FALSE	High	Master Protein	A0A088A569	Uncharacterized protein OS=Apis mellifera OX=7460 PE=4 SV=1	PREDICTED: Apis mellifera NADH dehydrogenase [ubiquinone] 1 beta subcomplex subunit 11, mitochondrial (LOC724719), mRNA	0	FALSE	7.525	8	3	3	3	425	48.9	7.99			0								2.35												2								1
FALSE	High	Master Protein	A0A088AIA6	Uncharacterized protein OS=Apis mellifera OX=7460 GN=LOC552448 PE=3 SV=1	PREDICTED: Apis mellifera ADP-ribosylation factor-like protein 8B-A (LOC552448), mRNA	0	FALSE	30.339	22	4	18	4	318	34.6	7.74				10.36		4.4			13.28	2.96				0										3		2			3	1				2
FALSE	High	Master Protein	A0A087ZW77	Uncharacterized protein OS=Apis mellifera OX=7460 GN=LOC552459 PE=4 SV=1	PREDICTED: Apis mellifera glycine-rich cell wall structural protein (LOC552459), transcript variant X10, mRNA	0	FALSE	22.562	9	6	10	6	1251	139.7	5.57		0	14.12		2.36			2.47														1	4		1			3
FALSE	High	Master Protein	A0A087ZQU9	Uncharacterized protein OS=Apis mellifera OX=7460 GN=LOC552528 PE=3 SV=1	PREDICTED: Apis mellifera calnexin (LOC552528), transcript variant X1, mRNA	0	FALSE	47.309	34	9	42	9	344	38.8	6.16	0		14.67		36.13	0		4.71	2.44	7.93			9.61					0			1		5		6	1		3	3	3			4
FALSE	High	Master Protein	A0A088A580	Uncharacterized protein OS=Apis mellifera OX=7460 GN=LOC726779 PE=4 SV=1		0.003	FALSE	2.609	8	1	1	1	143	16	10.56											2																				1
FALSE	High	Master Protein	A0A088A587	Uncharacterized protein OS=Apis mellifera OX=7460 PE=4 SV=1		0	FALSE	4.47	4	1	7	1	291	31.4	8.03		1.95	2.52					0		2.26		1.68			2.44				0			1	1					1		1		1
FALSE	High	Master Protein	A0A088AV16	Uncharacterized protein OS=Apis mellifera OX=7460 GN=LOC552562 PE=4 SV=1	PREDICTED: Apis mellifera transmembrane protein 53-A (LOC552562), transcript variant X1, mRNA	0	FALSE	7.69	2	3	5	3	1267	145.8	6.71				0		2.36					1.84							4.71						1		1					1
FALSE	High	Master Protein	A0A088A5A6	Uncharacterized protein OS=Apis mellifera OX=7460 GN=LOC409481 PE=3 SV=1		0	FALSE	7.634	5	3	7	3	668	75.5	7.18	0		0						0			0	0		1.86						1		1						2			1	1
FALSE	High	Master Protein	A0A088A5C5	Uncharacterized protein OS=Apis mellifera OX=7460 GN=LOC724680 PE=4 SV=1		0	FALSE	17.125	24	7	23	7	290	31.7	9.03	0		19.55						0	0	7.13		0								3		7						2	1	4		1
FALSE	High	Master Protein	A0A088A5F7	Uncharacterized protein OS=Apis mellifera OX=7460 GN=LOC725740 PE=4 SV=1		0.001	FALSE	3.907	6	1	1	1	158	17.9	9.2			2.58																				1
FALSE	High	Master Protein	A0A087ZUQ1	Uncharacterized protein OS=Apis mellifera OX=7460 GN=LOC552638 PE=4 SV=1	PREDICTED: Apis mellifera myosin regulatory light chain sqh (LOC550973), mRNA	0	FALSE	37.269	43	5	54	5	188	20.6	6.47	16.12				0	16.85		8.93		0	13.43	3.03	2.46	9.72	17.9			3.92		0	4				1	5		3		1	3	1	1	3
FALSE	High	Master Protein	A0A088A0F7	Uncharacterized protein OS=Apis mellifera OX=7460 GN=LOC552659 PE=4 SV=1	PREDICTED: Apis mellifera optic atrophy 3 protein homolog (LOC552659), mRNA	0	FALSE	40.677	31	8	35	8	337	37.6	8.84		21.83		3.47		0	1.78		2.31	1.65	7.05	2.12	7.48	1.63			5.34	16.02	0			4		3		1	1		1	1	3	1	3	2
FALSE	High	Master Protein	A0A087ZSC9	Uncharacterized protein OS=Apis mellifera OX=7460 GN=LOC552671 PE=4 SV=1	PREDICTED: Apis mellifera cytochrome b-c1 complex subunit 2, mitochondrial (LOC552671), mRNA	0.001	FALSE	3.315	6	1	2	1	327	37.9	9.23						0				1.84																1				1
FALSE	High	Master Protein	A0A088AM27	Uncharacterized protein OS=Apis mellifera OX=7460 GN=LOC552722 PE=4 SV=1	PREDICTED: Apis mellifera glyoxalase domain-containing protein 4 (LOC552722), mRNA	0	FALSE	18.438	17	5	16	5	358	39.2	6.61				2.57			0	2.49	0			6.17					9.92	5.68						2			1	1	1			2
FALSE	High	Master Protein	A0A088A5I7	Uncharacterized protein OS=Apis mellifera OX=7460 PE=4 SV=1		0	FALSE	12.694	34	4	5	4	186	21.3	7.3			2.61										9.86					2.79					1										3
FALSE	High	Master Protein	A0A087ZZ11	Uncharacterized protein OS=Apis mellifera OX=7460 GN=LOC552809 PE=4 SV=1	PREDICTED: Apis mellifera cytochrome c oxidase subunit NDUFA4 (LOC552809), mRNA	0	FALSE	5.03	3	1	6	1	417	46.8	5.99			3.68	0		1.88			2.11		0												1	1		1			1		1
FALSE	High	Master Protein	A0A088A5K5	Uncharacterized protein OS=Apis mellifera OX=7460 GN=100578514 PE=4 SV=1		0.001	FALSE	3.354	2	1	2	1	602	70.2	4.91			1.62			0																	1			1
FALSE	High	Master Protein	A0A088A5K7	Uncharacterized protein OS=Apis mellifera OX=7460 GN=100579019 PE=4 SV=1	PREDICTED: Apis mellifera probable salivary secreted peptide (LOC100579019), mRNA	0	FALSE	16.441	46	4	23	4	104	11.4	8.44	10.16			6.86		7.25			6.67		8.27			1.85							4			3		3			2		3			2
FALSE	High	Master Protein	A0A088A939	Uncharacterized protein OS=Apis mellifera OX=7460 GN=LOC724264 PE=4 SV=1	PREDICTED: Apis mellifera NADH dehydrogenase [ubiquinone] 1 alpha subcomplex subunit 7 (LOC724264), mRNA	0.003	FALSE	2.665	0	1	1	1	1834	213	7.58											0																				1
FALSE	High	Master Protein	A0A088A5L1	Uncharacterized protein OS=Apis mellifera OX=7460 GN=LOC725089 PE=4 SV=1	Apis mellifera clone AMDH3643 hypothetical protein mRNA, partial cds	0	FALSE	40.022	44	5	54	5	153	16.1	9.85	16.3		36.51	9.56	11.26	10.06		7.24	14.61	0	16.92		1.92	3.09							4		5	2	1	3		2	4	1	4		1	1
FALSE	High	Master Protein	A0A088A5M0	Uncharacterized protein OS=Apis mellifera OX=7460 GN=LOC724768 PE=4 SV=1		0	FALSE	22.872	28	7	9	7	316	37.2	9.47			1.95								10.84												1								6
FALSE	High	Master Protein	A0A088A5N2	Uncharacterized protein OS=Apis mellifera OX=7460 PE=4 SV=1	PREDICTED: Apis mellifera F-actin-monooxygenase Mical (LOC413310), transcript variant X1, mRNA	0.001	FALSE	3.239	3	1	1	1	353	41.6	9.35																		2.79
FALSE	High	Master Protein	A0A087ZVS0	Uncharacterized protein OS=Apis mellifera OX=7460 GN=LOC724676 PE=3 SV=1	PREDICTED: Apis mellifera ADP-ribosylation factor-like protein 1 (LOC724676), transcript variant X1, mRNA	0	FALSE	46.845	12	8	19	8	818	93.2	8.82			41.1	1.61						4.58	1.83		0										8	1						2	1		1
FALSE	High	Master Protein	A0A088A5N5	Uncharacterized protein OS=Apis mellifera OX=7460 GN=LOC726955 PE=4 SV=1		0	FALSE	13.118	20	3	4	3	229	25.5	5.38	2.69				0										0		3.55				1				1
FALSE	High	Master Protein	A0A087ZPU1	Uncharacterized protein OS=Apis mellifera OX=7460 GN=LOC724721 PE=3 SV=1	PREDICTED: Apis mellifera farnesol dehydrogenase (LOC724721), mRNA	0	FALSE	25.737	39	5	18	5	166	17.7	9.55	23.71					0								2.16					0		5					1								1
FALSE	High	Master Protein	A0A088A5R5	Uncharacterized protein OS=Apis mellifera OX=7460 PE=4 SV=1		0	FALSE	8.984	17	2	3	2	173	19.9	4.91			5.25								2.1												2								1
FALSE	High	Master Protein	A0A088A5W0	Uncharacterized protein OS=Apis mellifera OX=7460 PE=4 SV=1		0	FALSE	11.482	20	4	10	4	212	24.4	9.45			12.19						0		1.82			0									4						1		1			1
FALSE	High	Master Protein	A0A088A610	Uncharacterized protein OS=Apis mellifera OX=7460 GN=mRpL54 PE=4 SV=1	PREDICTED: Apis mellifera 39S ribosomal protein L54, mitochondrial (LOC726480), mRNA	0	FALSE	267.698	72	27	631	27	442	47.6	7.81	177.16	38.23	301.72	80.66	110.59	96.23		148.37	153	103.12	154.85		90.61	17.79	54.16	2.51		8.17	4.22	6.93	22	8	25	16	16	18		20	21	16	18		15	9
FALSE	High	Master Protein	A0A088A612	Uncharacterized protein OS=Apis mellifera OX=7460 GN=RpS16 PE=3 SV=1		0	FALSE	20.841	25	4	12	4	281	32.1	5.73	2.97			3.15					7.71		0		5.27					8.34			1			1					3		1		2
FALSE	High	Master Protein	A0A088A6H3	Uncharacterized protein OS=Apis mellifera OX=7460 PE=4 SV=1		0	FALSE	5.975	39	2	3	2	85	9.7	9.58				2.04						2.08										2.09				1						1
FALSE	High	Master Protein	A0A088ARL3	Uncharacterized protein OS=Apis mellifera OX=7460 GN=LOC724827 PE=4 SV=1	PREDICTED: Apis mellifera NADH dehydrogenase [ubiquinone] 1 beta subcomplex subunit 7 (LOC724827), mRNA	0.001	FALSE	3.861	19	1	1	1	74	8.6	8.62	0																				1
FALSE	High	Master Protein	A0A088A6M9	Uncharacterized protein OS=Apis mellifera OX=7460 GN=RpL12 PE=3 SV=1		0	FALSE	22.568	33	7	11	7	249	28	7.23				4.61									0					14.05						2									1
FALSE	High	Master Protein	A0A088A704	Uncharacterized protein OS=Apis mellifera OX=7460 GN=100576748 PE=4 SV=1		0	FALSE	8.725	30	2	7	2	82	9.6	8.85	0			2.04		3.94				2.11				0	0						1			1		2				1				1
FALSE	High	Master Protein	A0A088A730	Uncharacterized protein OS=Apis mellifera OX=7460 PE=4 SV=1		0	FALSE	4.452	6	1	4	1	180	20.2	7.14			2.37	2.03		1.69					2.09												1	1		1					1
FALSE	High	Master Protein	A0A088A747	Uncharacterized protein OS=Apis mellifera OX=7460 GN=LOC412235 PE=3 SV=1	PREDICTED: Apis mellifera caspase-1 (LOC412235), mRNA	0.001	FALSE	3.375	9	1	1	1	128	15.3	5.74			0																				1
FALSE	High	Master Protein	A0A088A7D2	Uncharacterized protein OS=Apis mellifera OX=7460 GN=LOC724580 PE=4 SV=1		0	FALSE	8.015	12	1	48	1	95	10.7	9.41	8.37	5.05	8.43	4.65	2.52	5.49	2.53	4.62	7.64	5.62	8.52	5.07	5.56	4.93	7.97	1.97	4.98	5.99	4.45	5.19	1	1	1	1	1	1	1	1	1	1	1	1	1	1
FALSE	High	Master Protein	A0A087ZT72	Uncharacterized protein OS=Apis mellifera OX=7460 GN=LOC725171 PE=4 SV=1	PREDICTED: Apis mellifera RNA-binding protein 33 (LOC725239), transcript variant X1, mRNA	0	FALSE	225.426	76	23	712	4	376	41.8	5.48	153.51	6.39	247.7	122.94	16.31	119.47	2.1	28.35	80.99	133.04	104.96	8.48	49.88	56.7	53.1	302.03	30.03	25.84	18.68	2.54	19	2	18	18	5	17	1	8	16	16	14	4	10	16
FALSE	High	Master Protein	A0A088A7J1	Uncharacterized protein OS=Apis mellifera OX=7460 PE=3 SV=1		0	FALSE	63.271	39	14	108	14	498	57	7.06	6.12		44.7	8.96	39.52	2.87		21.55	6.02	14.87	7.07		11.28		3.61			0			3		11	3	9	4		10	5	7	5		7
FALSE	High	Master Protein	A0A088A7M5	Uncharacterized protein OS=Apis mellifera OX=7460 PE=4 SV=1		0.001	FALSE	3.059	2	1	2	1	671	75.7	6.55									0	1.75																			1	1
FALSE	High	Master Protein	A0A087ZU39	Uncharacterized protein OS=Apis mellifera OX=7460 GN=LOC725258 PE=3 SV=1	PREDICTED: Apis mellifera very-long-chain 3-oxoacyl-CoA reductase (LOC725258), transcript variant X2, mRNA	0	FALSE	6.244	13	2	19	1	191	21.2	6.55	0	0	3.62	0	0	0	0	0	0	1.6	0		0				4.1				1	1	1	1	1	1	1	1	1	2	1		1
FALSE	High	Master Protein	A0A088A7W1	Uncharacterized protein OS=Apis mellifera OX=7460 GN=Drp1 PE=3 SV=1		0	FALSE	5.57	4	1	3	1	347	40.2	9.52			5.8								2.84												1								1
FALSE	High	Master Protein	A0A088AU44	Uncharacterized protein OS=Apis mellifera OX=7460 GN=LOC725274 PE=3 SV=1	PREDICTED: Apis mellifera 3-hydroxyacyl-CoA dehydrogenase type-2 (LOC725274), mRNA	0	FALSE	6.222	4	2	2	2	1846	213.5	4.42																3.4
FALSE	High	Master Protein	A0A088A7W2	Uncharacterized protein OS=Apis mellifera OX=7460 GN=LOC409074 PE=3 SV=1		0	FALSE	4.631	16	2	2	2	176	20.4	7.49			0								0												1								1
FALSE	High	Master Protein	A0A088AN34	Uncharacterized protein OS=Apis mellifera OX=7460 GN=LOC725548 PE=4 SV=1	PREDICTED: Apis mellifera protein FAM151B (LOC725548), transcript variant X1, mRNA	0	FALSE	14.201	5	2	3	2	668	77.9	7.23			9.28																				2
FALSE	High	Master Protein	A0A088A898	Uncharacterized protein OS=Apis mellifera OX=7460 PE=4 SV=1		0	FALSE	7.589	11	2	5	2	216	25.3	9.73	0		5.51								2.93		3.18								1		2								1		1
FALSE	High	Master Protein	A0A088AJC6	Uncharacterized protein OS=Apis mellifera OX=7460 GN=LOC725572 PE=4 SV=1	PREDICTED: Apis mellifera ribonuclease kappa-B (LOC725572), mRNA	0	FALSE	5.689	7	2	4	2	312	34.6	9.31	0		2.11								0										1		1								2
FALSE	High	Master Protein	A0A088AF83	Uncharacterized protein OS=Apis mellifera OX=7460 GN=LOC725623 PE=4 SV=1	PREDICTED: Apis mellifera heparanase (LOC725623), transcript variant X2, mRNA	0.001	FALSE	3.897	15	1	2	1	147	16.9	10.37			0								0												1								1
FALSE	High	Master Protein	A0A088A8B4	Uncharacterized protein OS=Apis mellifera OX=7460 PE=4 SV=1		0	FALSE	7.256	2	1	7	1	1037	117.1	8.31						0						2.75		2.25	2.53											1						1		1
FALSE	High	Master Protein	A0A088A8I9	Uncharacterized protein OS=Apis mellifera OX=7460 GN=LOC409930 PE=4 SV=1		0.003	FALSE	2.679	5	1	2	1	233	27	6.99											0		0																		1		1
FALSE	High	Master Protein	A0A088A8Y4	Uncharacterized protein OS=Apis mellifera OX=7460 GN=msps PE=4 SV=1		0	FALSE	15.662	23	3	19	3	117	13.9	9.86	0		10.02	4.51					10.24	6.98	2.1										1		2	2					3	2	2
FALSE	High	Master Protein	A0A088A086	Uncharacterized protein OS=Apis mellifera OX=7460 GN=LOC725797 PE=4 SV=1	PREDICTED: Apis mellifera NADH dehydrogenase [ubiquinone] 1 beta subcomplex subunit 3 (LOC725797), mRNA	0	FALSE	30.417	26	8	31	8	245	27.4	9.48			38.6	12.95	1.88			2.27	9.33	5.25				0									8	4	1			1	3	3				1
FALSE	High	Master Protein	A0A088A8Z3	Uncharacterized protein OS=Apis mellifera OX=7460 GN=100577128 PE=4 SV=1		0	FALSE	113.462	27	9	489	9	323	35	6.04	62.91	40.73	74.71	21.02	82.09	24.18	14.08	90.05	20.82	28.53	68.4	37.77	58.78	13.33	39.91	8	14.4	252.05	82.17	14.94	8	5	8	6	9	7	3	8	7	6	7	7	8	6
FALSE	High	Master Protein	A0A088A9G7	Uncharacterized protein OS=Apis mellifera OX=7460 PE=4 SV=1		0	FALSE	47.595	24	9	66	9	390	44.9	6.99	4.06		55.16	14.97	0	15.21		4.41	8.75	2.6	4.71			0	6.48						4		9	5	1	6		2	4	3	4			2
FALSE	High	Master Protein	A0A087ZQA3	Uncharacterized protein OS=Apis mellifera OX=7460 GN=LOC726088 PE=4 SV=1	PREDICTED: Apis mellifera serine/threonine-protein phosphatase 2A 65 kDa regulatory subunit A alpha isoform (LOC726088), transcript variant X2, mRNA	0	FALSE	4.06	14	1	4	1	95	11	9.94									0				2.43					2.94	0										1				1
FALSE	High	Master Protein	A0A088A9J0	Uncharacterized protein OS=Apis mellifera OX=7460 GN=LOC413047 PE=4 SV=1	PREDICTED: Apis mellifera venom carboxylesterase-6-like (LOC413047), mRNA	0	FALSE	23.063	21	6	12	6	373	44.3	9.74	0		12.6								0										1		6								2
FALSE	High	Master Protein	A0A088A9K6	Uncharacterized protein OS=Apis mellifera OX=7460 PE=3 SV=1		0	FALSE	31.453	45	5	29	5	104	11.8	7.81			21.53	5.31					16.09	8.64	0				2.49								3	1					5	3	1
FALSE	High	Master Protein	A0A088A9V9	Uncharacterized protein OS=Apis mellifera OX=7460 PE=4 SV=1		0	FALSE	21.322	8	3	10	3	590	65.7	5.06			10.13						0	0	2.53												2						1	1	2
FALSE	High	Master Protein	A0A088A9W0	Uncharacterized protein OS=Apis mellifera OX=7460 GN=LOC409163 PE=4 SV=1		0	FALSE	9.078	16	3	24	3	233	25.9	8.12	7.77	2.21	3.1		2.33	5.9		5.11			2.4	2.08		8.57	7.62	0					2	1	1		1	3		1			1	1		2
FALSE	High	Master Protein	A0A088A9Y7	Uncharacterized protein OS=Apis mellifera OX=7460 GN=mRpL53 PE=4 SV=1	PREDICTED: Apis mellifera 39S ribosomal protein L53, mitochondrial (LOC725918), mRNA	0	FALSE	29.107	58	6	72	6	78	9.5	9.6	11.66		36.36	2.2		0		0	23.66	3.52	7.67			0	2.46						3		6	3		3		2	5	3	3			3
FALSE	High	Master Protein	A0A088A9Z4	Uncharacterized protein OS=Apis mellifera OX=7460 PE=3 SV=1		0.009	FALSE	2.309	2	1	1	1	672	74.5	9.14													0																				1
FALSE	High	Master Protein	A0A088AA74	Uncharacterized protein OS=Apis mellifera OX=7460 GN=mRpS24 PE=4 SV=1	PREDICTED: Apis mellifera 28S ribosomal protein S24, mitochondrial (LOC552152), mRNA	0	FALSE	4.324	11	1	5	1	113	11.6	8.69	1.86										2.04										1										1
FALSE	High	Master Protein	A0A088AHM6	Uncharacterized protein OS=Apis mellifera OX=7460 GN=LOC726364 PE=4 SV=1	PREDICTED: Apis mellifera metaxin-2 (LOC726364), transcript variant X1, mRNA	0	FALSE	32.405	19	7	64	5	397	45.1	5.58	4.72		21.91	13.65		5.42		0	14.44	3.78	4.25		4.51	1.64	0	5.87					2		7	6		4		1	7	5	4		2	2
FALSE	High	Master Protein	A0A088AA90	Uncharacterized protein OS=Apis mellifera OX=7460 GN=LOC552534 PE=4 SV=1		0	FALSE	9.448	16	1	1	1	152	16.6	6.7			3.34																				1
FALSE	High	Master Protein	A0A088AJL8	Uncharacterized protein OS=Apis mellifera OX=7460 GN=LOC726571 PE=3 SV=1	PREDICTED: Apis mellifera venom acid phosphatase Acph-1 (LOC726571), mRNA	0	FALSE	6.538	7	3	7	3	422	48.9	6.96		2.53			2.27							0					1.74	1.83				1			2							1
FALSE	High	Master Protein	A0A088AAC3	Uncharacterized protein OS=Apis mellifera OX=7460 GN=100576193 PE=4 SV=1		0	FALSE	30.857	29	6	24	6	265	30	5.2			30.36						2.27	0			0										6						4	1			1
FALSE	High	Master Protein	A0A088AAD0	Uncharacterized protein OS=Apis mellifera OX=7460 GN=DHRS4 PE=4 SV=1	Apis mellifera dehydrogenase/reductase (SDR family) member 4 (DHRS4), mRNA	0	FALSE	6.14	8	2	11	2	220	25.5	9.39			2.51		1.76			1.74	1.77	1.79	3.61		4.71					1.9					2		1			1	1	1	2		1
FALSE	High	Master Protein	A0A088AAE7	Uncharacterized protein OS=Apis mellifera OX=7460 PE=4 SV=1		0	FALSE	145.402	53	14	371	14	391	45.1	8.51	69.88	28.5	125.57	34.48	83.75	45.7	28.98	160.59	4.52	24.58	76.02	12.52	37.75	42.19	70.58	4.8	10.58	16.06	4.93	11.93	11	5	12	9	11	11	6	14	1	7	12	3	6	9
FALSE	High	Master Protein	A0A087ZUV0	Uncharacterized protein OS=Apis mellifera OX=7460 GN=LOC726750 PE=4 SV=1	PREDICTED: Apis mellifera fibroin heavy chain (LOC726750), transcript variant X2, mRNA	0	FALSE	37.226	22	10	32	9	499	58.3	8.46			41.72	2.33		1.78		0	2.21	2.2	3.65							8.42					10	2		1		2	1	1	2
FALSE	High	Master Protein	A0A088AAG8	Uncharacterized protein OS=Apis mellifera OX=7460 GN=LOC726592 PE=4 SV=1	PREDICTED: Apis mellifera proteoglycan 4 (LOC726592), mRNA	0	FALSE	4.511	3	1	1	1	530	61.8	9.07			2.52																				1
FALSE	High	Master Protein	A0A088AAI2	Uncharacterized protein OS=Apis mellifera OX=7460 GN=mRpS18B PE=4 SV=1	PREDICTED: Apis mellifera 28S ribosomal protein S18b, mitochondrial (LOC552526), mRNA	0	FALSE	10.858	10	2	9	2	459	47.7	4.2					6.48	0		6.63						0	0										1	2		1						1
FALSE	High	Master Protein	A0A087ZZE1	Uncharacterized protein OS=Apis mellifera OX=7460 GN=LOC726833 PE=4 SV=1	PREDICTED: Apis mellifera TOM1-like protein 2 (LOC726833), transcript variant X2, mRNA	0	FALSE	11.479	5	2	8	2	431	48.9	9.88			6.05						4.05	2.15	2.24		2.18						1.72				2						2	1	1		1
FALSE	High	Master Protein	A0A088AAV5	Uncharacterized protein OS=Apis mellifera OX=7460 GN=LOC409809 PE=3 SV=1		0	FALSE	16.953	25	3	48	3	81	9.3	9.76	10.15		20.45	8.24	1.97	2.13		5.3	12.93	11.48	4.49		1.98	3.96	4.21						2		3	2	1	2		2	3	3	1		1	1
FALSE	High	Master Protein	A0A088AAY8	Uncharacterized protein OS=Apis mellifera OX=7460 GN=LOC409897 PE=4 SV=1		0	FALSE	10.874	2	2	5	2	1483	136.8	6.05	5			0										0							2			1										1
FALSE	High	Master Protein	A0A088AB56	Uncharacterized protein OS=Apis mellifera OX=7460 PE=4 SV=1		0	FALSE	4.162	1	1	1	1	1185	132.5	8.79											2.35																				1
FALSE	High	Master Protein	A0A088AB74	Uncharacterized protein OS=Apis mellifera OX=7460 PE=4 SV=1	PREDICTED: Apis mellifera protein artichoke (LOC726309), mRNA	0	FALSE	10.444	47	2	2	2	64	7.6	10.2											6.72																				2
FALSE	High	Master Protein	A0A088AQG0	Uncharacterized protein OS=Apis mellifera OX=7460 GN=LOC727141 PE=4 SV=1	PREDICTED: Apis mellifera IST1 homolog (LOC727141), transcript variant X4, mRNA	0	FALSE	25.469	22	5	8	5	351	41.7	8.56	0		6.99								2.63										1		3								3
FALSE	High	Master Protein	A0A088AB84	Uncharacterized protein OS=Apis mellifera OX=7460 GN=GstZ1 PE=3 SV=1		0	FALSE	3.941	2	1	2	1	525	58.4	4.97			2.76								0												1								1
FALSE	High	Master Protein	A0A088AB90	Uncharacterized protein OS=Apis mellifera OX=7460 PE=4 SV=1		0	FALSE	51.334	10	5	437	5	366	36.5	5.64	13.23	57.24	38.44	41.33	59.44	30.08		50.9	6.31	32.12	38.42	42.73	49.04	26.14	21.71	176.7		0	72.2	2.5	1	2	3	3	3	3		3	1	4	3	2	1	3
FALSE	High	Master Protein	A0A088ABA5	Uncharacterized protein OS=Apis mellifera OX=7460 GN=LOC409457 PE=4 SV=1		0	FALSE	9.37	15	2	7	2	252	29.4	8.35	1.73		4.68			0					7.89										1		1			1					2
FALSE	High	Master Protein	A0A088ABB1	Uncharacterized protein OS=Apis mellifera OX=7460 PE=4 SV=1		0	FALSE	21.957	10	2	63	2	292	33.2	7.2	3.62		13.83	1.83	11.02	15.83		6.39		6.76	4.69	4.33		2.15	1.62	3.2			0	0	2		2	2	2	2		2		2	2	1		2
FALSE	High	Master Protein	A0A088A3A2	Uncharacterized protein OS=Apis mellifera OX=7460 GN=mge PE=4 SV=1	PREDICTED: Apis mellifera mitochondrial import receptor subunit TOM22 homolog (LOC409500), mRNA	0.004	FALSE	2.509	3	1	2	1	478	54.8	5.44			0								0												1								1
FALSE	High	Master Protein	A0A088ABF0	Uncharacterized protein OS=Apis mellifera OX=7460 PE=4 SV=1		0	FALSE	5.505	36	2	8	2	78	8.3	9.52	1.67		4.72					1.82	0		1.87										2		2					1	1		1
FALSE	High	Master Protein	A0A087ZND8	Uncharacterized protein OS=Apis mellifera OX=7460 GN=Mlc2 PE=4 SV=1	PREDICTED: Apis mellifera myosin regulatory light chain 2 (LOC409881), mRNA	0	FALSE	72.65	44	4	255	4	251	27.2	9.33	49.2	21.94	117.46	36.72	45.95	72.47	5.16	27.7		65.72	44.17	11.43	15.92	36.33	65.23	12.26	2.29	21.35	8.34	13.2	3	2	4	2	2	4	1	2		3	4	2	2	3
FALSE	High	Master Protein	A0A088ASU4	Uncharacterized protein OS=Apis mellifera OX=7460 GN=Mlc-c PE=4 SV=1	PREDICTED: Apis mellifera myosin-2 essential light chain (LOC551149), transcript variant X2, mRNA	0	FALSE	14.021	8	4	7	4	590	68.4	6.71	0			0		1.68			0												1			2		1			2
FALSE	High	Master Protein	A0A088ABL3	Uncharacterized protein OS=Apis mellifera OX=7460 GN=P58IPK PE=4 SV=1		0	FALSE	7.517	8	2	6	2	357	40.6	5.44				0					0	0				0										1					2	2				1
FALSE	High	Master Protein	A0A088AET5	Uncharacterized protein OS=Apis mellifera OX=7460 GN=mRpL1 PE=4 SV=1	PREDICTED: Apis mellifera 50S ribosomal protein L1 (LOC724493), transcript variant X1, mRNA	0.008	FALSE	2.335	0	1	1	1	2804	316.2	5.82									0																				1
FALSE	High	Master Protein	A0A088AH49	Uncharacterized protein OS=Apis mellifera OX=7460 GN=mRpL13 PE=3 SV=1	PREDICTED: Apis mellifera 39S ribosomal protein L13, mitochondrial (LOC413928), mRNA	0	FALSE	105.761	56	14	343	14	270	32	7.64	11.26	44.2	60.49	35.69	147.72	9.25	6.5	70.1	32.07	47.92	14.88	6.05	114.78	5.29	34.08	0	3.56	46.74		20.22	7	7	10	9	14	6	2	11	10	9	6	2	13	3
FALSE	High	Master Protein	A0A088ABN1	Uncharacterized protein OS=Apis mellifera OX=7460 GN=CPR4 PE=4 SV=1		0	FALSE	25.903	11	8	20	8	951	110.3	6.47			13.49	0	4.37				0	4.55													3	3	2				4	5
FALSE	High	Master Protein	A0A088ABN2	Uncharacterized protein OS=Apis mellifera OX=7460 GN=CPR3 PE=4 SV=1	Apis mellifera cuticular protein 3 (CPR3), mRNA	0	FALSE	8.847	12	2	23	2	252	29.3	8.16	2.19			1.84	4.83	3.54		2.19	4.02	2.07	4.62		4.01	1.8	4.25			2.37		0	1			1	1	1		1	1	1	2		2	1
FALSE	High	Master Protein	A0A088ABR1	Uncharacterized protein OS=Apis mellifera OX=7460 PE=4 SV=1		0.001	FALSE	3.064	9	1	1	1	143	15.7	4.23			2.96																				1
FALSE	High	Master Protein	A0A088ABV3	Uncharacterized protein OS=Apis mellifera OX=7460 PE=3 SV=1		0	FALSE	26.517	22	2	6	2	213	23.5	4.89			9.97			7.29		2.64															1			1		1
FALSE	High	Master Protein	A0A088ANR4	Uncharacterized protein OS=Apis mellifera OX=7460 GN=mRpL3 PE=4 SV=1	PREDICTED: Apis mellifera 39S ribosomal protein L3, mitochondrial (LOC552676), transcript variant X1, mRNA	0	FALSE	10.22	14	3	10	3	132	14.9	9.92	0	1.74		0		0			2.19				4.31					1.77			1	1		1		1			1				2
FALSE	High	Master Protein	A0A088AC03	Uncharacterized protein OS=Apis mellifera OX=7460 GN=Uqcr11 PE=4 SV=1		0	FALSE	14.984	35	3	5	3	155	17.6	4.87			7.84																				3
FALSE	High	Master Protein	A0A088AC05	Uncharacterized protein OS=Apis mellifera OX=7460 GN=LOC551318 PE=4 SV=1		0.008	FALSE	2.328	3	1	1	1	468	52.7	5.83																		2.06
FALSE	High	Master Protein	A0A088AC22	Uncharacterized protein OS=Apis mellifera OX=7460 GN=100576961 PE=4 SV=1		0	FALSE	11.62	24	3	6	3	178	21.1	9.22			3.74								8.08												1								3
FALSE	High	Master Protein	A0A088AC74	Uncharacterized protein OS=Apis mellifera OX=7460 PE=3 SV=1		0	FALSE	3.964	13	1	1	1	147	16.4	10.17											2.19																				1
FALSE	High	Master Protein	A0A088ACD2	Uncharacterized protein OS=Apis mellifera OX=7460 GN=LOC551217 PE=4 SV=1		0	FALSE	13.345	25	3	7	3	151	17.3	9.91	0		7.51						0		5.64										1		2						1		2
FALSE	High	Master Protein	A0A088ACK2	Uncharacterized protein OS=Apis mellifera OX=7460 PE=4 SV=1		0	FALSE	6.365	6	2	3	2	406	47.7	8.59	0										4.35										1										2
FALSE	High	Master Protein	A0A088ACK3	Uncharacterized protein OS=Apis mellifera OX=7460 PE=4 SV=1		0.001	FALSE	3.801	3	1	2	1	398	47.6	9.19	0										2.82										1										1
FALSE	High	Master Protein	A0A088ACU4	Uncharacterized protein OS=Apis mellifera OX=7460 GN=100577043 PE=4 SV=1		0	FALSE	9.639	17	4	5	4	268	32.2	9.91			0								7.65												1								4
FALSE	High	Master Protein	A0A088ACZ2	Uncharacterized protein OS=Apis mellifera OX=7460 PE=3 SV=1	PREDICTED: Apis mellifera glyoxylate reductase/hydroxypyruvate reductase (LOC410042), mRNA	0	FALSE	6.5	21	2	3	2	120	13.3	9			0								3.57												1								2
FALSE	High	Master Protein	A0A088AD10	Uncharacterized protein OS=Apis mellifera OX=7460 GN=LOC724772 PE=4 SV=1	PREDICTED: Apis mellifera leucine-rich repeat neuronal protein 1 (LOC724772), mRNA	0.001	FALSE	3.07	15	1	1	1	171	19.1	10.87											0																				1
FALSE	High	Master Protein	A0A088AD22	Uncharacterized protein OS=Apis mellifera OX=7460 GN=100578927 PE=4 SV=1		0	FALSE	17.584	19	3	11	3	164	19	9.09	1.95		11.66			0					9.99										1		3			1					3
FALSE	High	Master Protein	A0A088A204	Uncharacterized protein OS=Apis mellifera OX=7460 GN=mRpS2 PE=3 SV=1	PREDICTED: Apis mellifera 28S ribosomal protein S2, mitochondrial (LOC411862), mRNA	0	FALSE	7.885	5	2	3	2	449	50.5	7.62				4.32					2.03															1					1
FALSE	High	Master Protein	A0A088AD26	Uncharacterized protein OS=Apis mellifera OX=7460 GN=LOC411378 PE=4 SV=1	PREDICTED: Apis mellifera prostaglandin reductase 1 (LOC411378), mRNA	0	FALSE	19.031	29	5	13	5	189	22.1	9.17	3.83		5.81								14.15										3		2								5
FALSE	High	Master Protein	A0A088AD28	Uncharacterized protein OS=Apis mellifera OX=7460 GN=LOC552329 PE=3 SV=1	PREDICTED: Apis mellifera CTL-like protein 1 (LOC552329), mRNA	0	FALSE	16.992	25	4	7	4	259	29.6	8.22			5.18								5.01												2								4
FALSE	High	Master Protein	A0A088APH0	Uncharacterized protein OS=Apis mellifera OX=7460 GN=mRpS30 PE=4 SV=1	PREDICTED: Apis mellifera 39S ribosomal protein S30, mitochondrial (LOC412984), mRNA	0	FALSE	152.265	7	39	83	39	9504	1062	6.3		26.4		2.49			34.13	4.58				33.37	5.46			3.24	54.79	15.57				11		2			12	1				19	3
FALSE	High	Master Protein	A0A088AD35	Uncharacterized protein OS=Apis mellifera OX=7460 GN=LOC412460 PE=3 SV=1		0	FALSE	29.129	26	7	18	7	386	44.7	8.69	1.82		14.15						2.64		21.1										3		3						1		7
FALSE	High	Master Protein	A0A088AD88	Uncharacterized protein OS=Apis mellifera OX=7460 GN=LOC551859 PE=3 SV=1		0	FALSE	10.49	12	2	7	2	195	22.4	9.69			4.49						0		9.47												1						1		2
FALSE	High	Master Protein	A0A088ADA6	Uncharacterized protein OS=Apis mellifera OX=7460 GN=LOC551483 PE=4 SV=1	PREDICTED: Apis mellifera calcium channel flower (LOC551483), transcript variant X1, mRNA	0	FALSE	27.083	19	6	13	6	437	49.7	10.13	6.31		8.13								17.17										3		2								5
FALSE	High	Master Protein	A0A088ADD3	Uncharacterized protein OS=Apis mellifera OX=7460 PE=4 SV=1	PREDICTED: Apis mellifera cytosolic purine 5'-nucleotidase (LOC551770), transcript variant X7, mRNA	0	FALSE	12.598	23	4	10	4	150	17.7	9.5	1.65		6.51						0		4.36										1		3						1		2
FALSE	High	Master Protein	A0A088A0N4	Uncharacterized protein OS=Apis mellifera OX=7460 GN=Mtch PE=3 SV=1	PREDICTED: Apis mellifera mitochondrial carrier homolog 2 (LOC726264), transcript variant X2, mRNA	0.001	FALSE	3.148	1	1	1	1	1233	138.6	6.9																		2.25
FALSE	High	Master Protein	A0A088AR18	Uncharacterized protein OS=Apis mellifera OX=7460 GN=Mvl PE=3 SV=1	Apis mellifera malvolio-like mRNA sequence	0	FALSE	1792.89	43	133	5341	133	4006	445.7	5.43	66.61	231.73	2145.28	1593.3	1621.86	136.72	193.44	1005.49	786.42	2259.84	22.06	190.92	522.5	113.04	1273.02	8.11	345.3	107.83	111.91	293.2	32	31	111	103	93	47	27	88	95	119	11	40	61	46
FALSE	High	Master Protein	A0A088A019	Uncharacterized protein OS=Apis mellifera OX=7460 GN=Myo1A PE=3 SV=1	PREDICTED: Apis mellifera myosin-IA (LOC552299), transcript variant X2, mRNA	0	FALSE	36.623	21	9	17	9	586	64.4	8.19	2.11		8.39			0					21.9										2		4			1					7
FALSE	High	Master Protein	A0A088ADG7	Uncharacterized protein OS=Apis mellifera OX=7460 PE=4 SV=1	PREDICTED: Apis mellifera cytosol aminopeptidase (LOC552109), transcript variant X2, mRNA	0	FALSE	15.16	11	3	13	3	313	35.6	8.9	0		2.87						4.61		12.6		4.52								1		1						2		3		2
FALSE	High	Master Protein	A0A088A390	Uncharacterized protein OS=Apis mellifera OX=7460 GN=Ndufa5 PE=4 SV=1	PREDICTED: Apis mellifera NADH dehydrogenase [ubiquinone] 1 alpha subcomplex subunit 5 (LOC413014), mRNA	0	FALSE	41.758	31	9	40	9	359	41.8	6.79	4.6		19.39			0			3.85		25.4		2.22								4		5			3			2		8		1
FALSE	High	Master Protein	A0A088ADK8	Uncharacterized protein OS=Apis mellifera OX=7460 GN=Gfat2 PE=4 SV=1	PREDICTED: Apis mellifera glucosamine-fructose-6-phosphate aminotransferase 2 (Gfat2), transcript variant X2, mRNA	0	FALSE	4.183	3	1	1	1	587	65.6	6.62			3.06																				1
FALSE	High	Master Protein	A0A088A768	Uncharacterized protein OS=Apis mellifera OX=7460 GN=Ndufs4 PE=4 SV=1	PREDICTED: Apis mellifera NADH dehydrogenase [ubiquinone] iron-sulfur protein 4, mitochondrial (LOC727599), mRNA	0	FALSE	4.403	5	2	3	2	538	62.9	8.47													0				2.17	2.24															1
FALSE	High	Master Protein	A0A088AFL8	Uncharacterized protein OS=Apis mellifera OX=7460 GN=Ndufs8 PE=3 SV=1	PREDICTED: Apis mellifera NADH-quinone oxidoreductase subunit I (LOC551078), mRNA	0	FALSE	5.814	11	2	6	2	221	24.9	4.82			7.49	1.7						2.28													2	1						1
FALSE	High	Master Protein	A0A087ZU85	Uncharacterized protein OS=Apis mellifera OX=7460 GN=Ndufv2 PE=4 SV=1	PREDICTED: Apis mellifera NADH dehydrogenase [ubiquinone] flavoprotein 2, mitochondrial (LOC409793), mRNA	0	FALSE	58.255	35	6	256	6	152	17.6	5.92	71.01	5.49	78.91	30.41	21.23	38.6		39.31	62.6	33.79	77.02	0	33.73	13.74	23.89	49.73			23.82	14.56	6	1	6	4	3	6		5	6	6	5	1	4	5
FALSE	High	Master Protein	A0A087ZVN6	Uncharacterized protein OS=Apis mellifera OX=7460 GN=Nipsnap PE=4 SV=1	PREDICTED: Apis mellifera protein NipSnap (LOC409442), mRNA	0	FALSE	13.79	23	3	25	3	149	17.1	9.74	3.95	13.03	5.39	2.76		3.69		1.92	1.99		2.05	2.7		0	0	2.59					2	2	1	2		2		1	1		1	1		1
FALSE	High	Master Protein	A0A088A4D5	Uncharacterized protein OS=Apis mellifera OX=7460 GN=nrv2 PE=4 SV=1	PREDICTED: Apis mellifera sodium/potassium-transporting ATPase subunit beta-2 (LOC410905), mRNA	0	FALSE	7.855	10	1	3	1	190	21.6	5.31			8.23						2.03														1						1
FALSE	High	Master Protein	A0A088ADM4	Uncharacterized protein OS=Apis mellifera OX=7460 GN=LOC724738 PE=4 SV=1		0	FALSE	169.234	42	37	283	37	1017	118	9.14	29.19		103.97	14.73	13.44	19.24		11.43	26.06	44.51	69.7		51.22	4.5	21.67	8.98	15.3	53.61	1.93	0	18		23	10	8	15		7	13	19	25		15	10
FALSE	High	Master Protein	A0A088ADQ7	Uncharacterized protein OS=Apis mellifera OX=7460 PE=3 SV=1		0	FALSE	47.789	69	7	66	7	118	13.8	8.37	9.98		48.32	11.59	0	6.33		4.55	18.61	6.95	20.36		7.42	1.9	4.24	2.79					3		7	4	1	4		2	5	3	6		3	1
FALSE	High	Master Protein	A0A088ASJ9	Uncharacterized protein OS=Apis mellifera OX=7460 GN=Pgm1 PE=3 SV=1	PREDICTED: Apis mellifera phosphoglucomutase (LOC411897), transcript variant X1, mRNA	0	FALSE	35.188	43	6	18	6	210	23.5	4.58	0		27.4	2.14					0							6.86					1		4	2					1
FALSE	High	Master Protein	A0A088ADS2	Uncharacterized protein OS=Apis mellifera OX=7460 PE=4 SV=1	PREDICTED: Apis mellifera protein bark beetle (LOC725269), mRNA	0	FALSE	26.221	35	7	24	7	161	18.9	9.82			16.33	3.72					12.78	0	0												4	3					6	1	1
FALSE	High	Master Protein	A0A088ACZ3	Uncharacterized protein OS=Apis mellifera OX=7460 GN=porin PE=4 SV=1	PREDICTED: Apis mellifera voltage-dependent anion-selective channel (LOC551325), mRNA	0	FALSE	5.663	22	2	4	2	124	14.8	9.89	0										2.15										1										2
FALSE	High	Master Protein	A0A088ADT0	Uncharacterized protein OS=Apis mellifera OX=7460 PE=4 SV=1	PREDICTED: Apis mellifera palmitoyl-protein thioesterase 1 (LOC551664), mRNA	0	FALSE	44.552	45	8	54	8	243	27.4	8	8.18		37.96	10.06		1.67		1.78	19.95	1.74	7.96		4.59			0					5		6	4		2		1	6	1	2		2
FALSE	High	Master Protein	A0A088A9Q2	Uncharacterized protein OS=Apis mellifera OX=7460 GN=Pros26 PE=4 SV=1	PREDICTED: Apis mellifera proteasome subunit beta type-1 (LOC411695), mRNA	0	FALSE	41.145	36	4	61	4	122	14.3	8.97	13.29		45.49	4.92	5.27	2.99		10.13	20.44	14.83	12.65		5.53	2.27						2.21	2		4	1	1	2		2	4	4	3		2	1
FALSE	High	Master Protein	A0A088AE21	Uncharacterized protein OS=Apis mellifera OX=7460 GN=mfrn PE=3 SV=1		0	FALSE	7.789	11	2	2	2	322	36.9	7.91			4.61																				2
FALSE	High	Master Protein	A0A087ZNX0	Uncharacterized protein OS=Apis mellifera OX=7460 GN=Rab11 PE=4 SV=1	PREDICTED: Apis mellifera ras-related protein Rab-11A (LOC551603), transcript variant X1, mRNA	0	FALSE	18.055	27	4	12	4	203	23.3	6.27	1.66					7.14				2.33	2.09			2.05							2					4				1	1			2
FALSE	High	Master Protein	A0A087ZVJ9	Uncharacterized protein OS=Apis mellifera OX=7460 GN=Rab6 PE=4 SV=1	PREDICTED: Apis mellifera ras-related protein Rab6 (LOC409004), transcript variant X2, mRNA	0	FALSE	30.039	21	8	17	8	629	70.6	8.41	1.61					4.1		0		0	0			2.18					1.61		2					6		1		1	1			3
FALSE	High	Master Protein	A0A088AE92	Uncharacterized protein OS=Apis mellifera OX=7460 GN=LOC410854 PE=4 SV=1	PREDICTED: Apis mellifera seipin (LOC410854), mRNA	0	FALSE	76.628	48	9	79	9	207	22.6	9.73	8.87		72.91	5.69	0	2.32		0	16.96	4.31	29.72		2.43	0							3		9	2	1	3		1	5	3	7		1	3
FALSE	High	Master Protein	A0A088AEA3	Uncharacterized protein OS=Apis mellifera OX=7460 GN=mRpS29 PE=4 SV=1		0.007	FALSE	2.383	2	1	3	1	482	55.5	6.95				1.71					1.78		0													1					1		1
FALSE	High	Master Protein	A0A088AHI9	Uncharacterized protein OS=Apis mellifera OX=7460 GN=RANBP2 PE=4 SV=1	PREDICTED: Apis mellifera RANBP2-like and GRIP domain-containing protein 5/6 (LOC726272), transcript variant X1, mRNA	0	FALSE	15.427	16	2	7	2	186	21.3	9.72			17.51								0												2								1
FALSE	High	Master Protein	A0A088AEF9	Uncharacterized protein OS=Apis mellifera OX=7460 PE=4 SV=1	PREDICTED: Apis mellifera chitin synthase chs-2 (LOC412215), transcript variant X7, mRNA	0.001	FALSE	3.231	2	1	1	1	563	61.9	6.48			2.3																				1
FALSE	High	Master Protein	A0A088AEG2	Uncharacterized protein OS=Apis mellifera OX=7460 GN=100577143 PE=4 SV=1		0	FALSE	4.731	1	1	7	1	1217	140.1	5.95	0			4.92				2.36	2.56	5.79											1			1				1	1	1
FALSE	High	Master Protein	A0A088AEI9	Uncharacterized protein OS=Apis mellifera OX=7460 PE=3 SV=1		0	FALSE	176.215	66	16	1589	16	283	30.5	8.18	267.71	60.72	348.18	72.81	151.18	108.13	23.25	274.73	115.28	78.09	530.29	33.43	257.13	57.04	93.49	64.75	37.74	523.89	308.64	57.59	12	7	13	9	10	11	5	12	12	9	13	6	13	8
FALSE	High	Master Protein	A0A088AEK1	Uncharacterized protein OS=Apis mellifera OX=7460 PE=3 SV=1		0	FALSE	10.369	14	3	3	3	236	26.1	5.95																		7.98
FALSE	High	Master Protein	A0A088AEP1	Uncharacterized protein OS=Apis mellifera OX=7460 PE=4 SV=1		0	FALSE	5.229	11	2	6	1	209	23.6	5.53			2.28	1.63		0					2.78							2.87					1	1		1					1
FALSE	High	Master Protein	A0A088AEQ3	Uncharacterized protein OS=Apis mellifera OX=7460 PE=3 SV=1		0.001	FALSE	3.246	1	1	1	1	1137	129.3	5.77									2.1																				1
FALSE	High	Master Protein	A0A088A0L9	Uncharacterized protein OS=Apis mellifera OX=7460 GN=RpL9 PE=4 SV=1	PREDICTED: Apis mellifera 60S ribosomal protein L9 (LOC551107), mRNA	0	FALSE	34.116	24	8	37	7	423	48.1	5.49	1.68		16.36	7.06		5.49		2.07	19.29	11.67	8.22			0							1		4	3		2		1	7	5	3			1
FALSE	High	Master Protein	A0A088AHE1	Uncharacterized protein OS=Apis mellifera OX=7460 GN=RpLP1 PE=3 SV=1	Apis mellifera ribosomal protein LP1 (RpLP1), mRNA	0	FALSE	4.729	3	2	8	1	499	57.6	8.69			5.12	3.34				2.15			4.06							0					1	1				1			1
FALSE	High	Master Protein	A0A088AET0	Uncharacterized protein OS=Apis mellifera OX=7460 GN=Sply PE=3 SV=1	PREDICTED: Apis mellifera sphingosine-1-phosphate lyase (LOC551593), transcript variant X1, mRNA	0	FALSE	23.308	38	7	47	6	192	21.5	8.15	0	0	23.35	2.3	0	0	0	0	2.36	9.71	0		0		2.37	2.41	4.1	0	1.62		1	1	6	3	1	2	1	1	3	4	1		1
FALSE	High	Master Protein	A0A087ZUL8	Uncharacterized protein OS=Apis mellifera OX=7460 GN=RpS15 PE=3 SV=1	PREDICTED: Apis mellifera 40S ribosomal protein S15 (LOC551644), mRNA	0	FALSE	5.906	18	2	9	2	158	17.5	6.3		1.66	0					1.56		1.71		1.49							0			1	1					1		1		1
FALSE	High	Master Protein	A0A088AEU7	Uncharacterized protein OS=Apis mellifera OX=7460 PE=4 SV=1	PREDICTED: Apis mellifera SRR1-like protein (LOC100577209), mRNA	0	FALSE	18.057	22	4	12	4	213	23.9	5.57			7.27	0		0		0		7.74				0									2	2		1		1		3				1
FALSE	High	Master Protein	A0A088AEW5	Uncharacterized protein OS=Apis mellifera OX=7460 GN=LOC408510 PE=4 SV=1		0	FALSE	10.365	16	4	13	4	204	23.3	11.36	1.65		5.44	1.49		1.58		1.66	1.73	2.01	2.37										1		2	2		2		1	1	1	3
FALSE	High	Master Protein	H9KEI2	Uncharacterized protein OS=Apis mellifera OX=7460 GN=RpS19a PE=4 SV=1	PREDICTED: Apis mellifera 40S ribosomal protein S19 (LOC726270), mRNA	0	FALSE	21.273	26	5	15	5	265	30.9	9.06					9.99				8.17			0			1.78										4				5			1
FALSE	High	Master Protein	A0A088AEW9	Uncharacterized protein OS=Apis mellifera OX=7460 GN=726323 PE=4 SV=1		0	FALSE	12.249	22	4	9	4	185	21.4	10.1			3	3.14					3.16	2.08	2.9			0									2	1					1	1	3			1
FALSE	High	Master Protein	A0A088AF43	Uncharacterized protein OS=Apis mellifera OX=7460 GN=LOC410612 PE=3 SV=1	PREDICTED: Apis mellifera solute carrier family 25 member 44 (LOC410612), transcript variant X2, mRNA	0	FALSE	14.397	25	2	8	2	140	14.8	10.58			8.32	2.9		2.56			2.19		7.81			0									2	1		1			1		2			1
FALSE	High	Master Protein	A0A088AF62	Uncharacterized protein OS=Apis mellifera OX=7460 GN=LOC725661 PE=4 SV=1		0.001	FALSE	3.252	14	1	3	1	111	11.6	4.5				1.65					0															1					1
FALSE	High	Master Protein	A0A088AF65	Uncharacterized protein OS=Apis mellifera OX=7460 GN=102653784 PE=4 SV=1		0	FALSE	16.996	35	4	13	4	114	12	4.56	2.18		2.26	1.63	0	0			9.08		2.4							2.76			1		1	1	1	1			4		1
FALSE	High	Master Protein	A0A088ARB1	Uncharacterized protein OS=Apis mellifera OX=7460 GN=shrb PE=4 SV=1	Sequence ID: XM_006564850.3Length: 889Number of Matches: 1	0	FALSE	14.746	42	5	15	5	143	16.2	9.16			2.38	2.82					0		8.52			3.95									1	3					1		4			2
FALSE	High	Master Protein	A0A088AF89	Uncharacterized protein OS=Apis mellifera OX=7460 GN=alpha-Cat PE=4 SV=1		0	FALSE	7.055	17	3	8	3	148	16.9	10.18			1.88	0							5.64												2	1							3
FALSE	High	Master Protein	A0A088AF99	Uncharacterized protein OS=Apis mellifera OX=7460 GN=LOC410616 PE=3 SV=1	PREDICTED: Apis mellifera xaa-Pro aminopeptidase ApepP (LOC410616), transcript variant X1, mRNA	0	FALSE	8.098	16	2	26	2	131	15.4	9.82	0		5.64	1.71	0	6.47		5.71	4.17	6.82	8.4		5.67	4.07	2.31						1		1	1	1	2		1	2	2	2		1	2
FALSE	High	Master Protein	A0A088AFS2	Uncharacterized protein OS=Apis mellifera OX=7460 PE=4 SV=1		0	FALSE	8.969	2	2	2	2	2153	243.2	5.55			5.05																				2
FALSE	High	Master Protein	A0A088A8V7	Uncharacterized protein OS=Apis mellifera OX=7460 GN=SrpRbeta PE=4 SV=1	PREDICTED: Apis mellifera signal recognition particle receptor subunit beta (LOC410469), mRNA	0	FALSE	203.149	87	17	351	17	254	27.1	9.09	151.22		152.25	65.49	9.96	78.59		14.07	57.34	59.22	224.08		27.62	51.83		8.66		8.37	1.68	0	14		15	9	3	14		4	11	9	17		5	9
FALSE	High	Master Protein	A0A088AW94	Uncharacterized protein OS=Apis mellifera OX=7460 GN=Surf4 PE=4 SV=1	PREDICTED: Apis mellifera surfeit locus protein 4 homolog (LOC552234), mRNA	0	FALSE	8.354	5	1	11	1	296	33.4	5.06	2.11		3.15	2.08		2.01		1.77	1.65	0	2.12		3.44					6.06			1		1	1		1		1	1	1	1		1
FALSE	High	Master Protein	A0A088AFU7	Uncharacterized protein OS=Apis mellifera OX=7460 GN=LOC724901 PE=3 SV=1	PREDICTED: Apis mellifera bleomycin hydrolase (LOC724901), transcript variant X2, mRNA	0	FALSE	65.846	27	13	33	13	549	61.6	8.51	0		60.37	0		0			7.98	0	2.05										1		12	1		1			5	1	1
FALSE	High	Master Protein	A0A088A9Z0	Uncharacterized protein OS=Apis mellifera OX=7460 GN=TEPA PE=4 SV=1	PREDICTED: Apis mellifera CD109 antigen (LOC413980), transcript variant X2, mRNA	0	FALSE	4.502	7	1	3	1	186	22.2	9.6	2.28										5.6										1										1
FALSE	High	Master Protein	A0A088AFM4	Uncharacterized protein OS=Apis mellifera OX=7460 GN=TER94 PE=3 SV=1	PREDICTED: Apis mellifera transitional endoplasmic reticulum ATPase TER94 (LOC409377), mRNA	0	FALSE	17.241	29	5	6	5	248	27.3	9.17	2.34		1.79								7.66										1		1								4
FALSE	High	Master Protein	A0A088AFV0	Uncharacterized protein OS=Apis mellifera OX=7460 PE=4 SV=1		0	FALSE	4.937	7	1	1	1	244	27.7	8.21											2.65																				1
FALSE	High	Master Protein	A0A088AFV1	Uncharacterized protein OS=Apis mellifera OX=7460 GN=LOC412610 PE=4 SV=1		0	FALSE	8.673	9	2	8	2	270	30.4	8.16	0	0						0			5.07		2.71					4.27			1	1						1			1		1
FALSE	High	Master Protein	A0A088AFV4	Uncharacterized protein OS=Apis mellifera OX=7460 GN=mRpL28 PE=4 SV=1	PREDICTED: Apis mellifera 39S ribosomal protein L28, mitochondrial (LOC412473), mRNA	0	FALSE	5.47	13	2	2	2	174	19.3	7.83			2.41			0																	1			1
FALSE	High	Master Protein	A0A087ZSA0	Uncharacterized protein OS=Apis mellifera OX=7460 GN=Tom7 PE=4 SV=1	Apis mellifera translocase of outer membrane 7 (Tom7), mRNA	0	FALSE	43.153	22	7	17	1	376	42.7	6.89	5.46										39.27										3										7
FALSE	High	Master Protein	A0A088A4X3	Uncharacterized protein OS=Apis mellifera OX=7460 GN=Trap1 PE=3 SV=1	PREDICTED: Apis mellifera heat shock protein 75 kDa, mitochondrial (LOC550968), mRNA	0	FALSE	14.831	14	4	5	4	280	31.8	9.11	5.21		2.18							2.04											3		1							1
FALSE	High	Master Protein	A0A088AQ77	Uncharacterized protein OS=Apis mellifera OX=7460 GN=Tsf2 PE=4 SV=1	PREDICTED: Apis mellifera melanotransferrin (LOC413167), mRNA	0	FALSE	36.913	9	4	30	4	844	87.8	7.4	9.08	2.59	27.12	0	8.37	7.51				3.01			3.21	5.38	10.47						3	1	4	2	2	2				1			1	1
FALSE	High	Master Protein	A0A088AFV5	Uncharacterized protein OS=Apis mellifera OX=7460 GN=RpLP2 PE=3 SV=1		0	FALSE	49.838	9	10	21	10	1612	184.9	6.62			30.78		1.62			4.08								0							9		3			3
FALSE	High	Master Protein	A0A087ZQ48	Uncharacterized protein OS=Apis mellifera OX=7460 GN=Vha26 PE=3 SV=1	PREDICTED: Apis mellifera V-type proton ATPase subunit E (LOC552720), mRNA	0.007	FALSE	2.37	8	1	1	1	299	31	8.13																0
FALSE	High	Master Protein	A0A088AUP1	Uncharacterized protein OS=Apis mellifera OX=7460 GN=vib PE=4 SV=1	PREDICTED: Apis mellifera phosphatidylinositol transfer protein alpha isoform (LOC552183), mRNA	0	FALSE	56.423	21	12	71	12	995	104.4	6.29		38.7	24.73			11.1	7.03	0		0		25.64		12.68	34.99							8	6			6	4	1		1		7		7
FALSE	High	Master Protein	A0A088AG18	Uncharacterized protein OS=Apis mellifera OX=7460 GN=Sap-r PE=4 SV=1		0	FALSE	12.238	5	3	6	3	800	88.8	5.33			2.9	4.5					0		2.91			2.09									1	2					1		1			1
FALSE	High	Master Protein	A0A088AMI6	Uncharacterized protein OS=Apis mellifera OX=7460 GN=Y-x1 PE=4 SV=1	PREDICTED: Apis mellifera yellow-x1 (LOC724293), mRNA	0.001	FALSE	3.274	6	1	1	1	349	38.6	5.47			0																				1
FALSE	High	Master Protein	A0A088AG24	Uncharacterized protein OS=Apis mellifera OX=7460 GN=100576125 PE=4 SV=1		0.001	FALSE	3.205	1	1	1	1	1201	137	7.31									0																				1
FALSE	High	Master Protein	A0A088AG74	Uncharacterized protein OS=Apis mellifera OX=7460 GN=LOC725011 PE=3 SV=1	PREDICTED: Apis mellifera cytochrome c oxidase assembly protein COX18, mitochondrial (LOC725011), transcript variant X1, mRNA	0.001	FALSE	3.041	2	1	1	1	444	49.7	4.96									2.23																				1
FALSE	High	Master Protein	A0A088AG76	Uncharacterized protein OS=Apis mellifera OX=7460 PE=3 SV=1		0	FALSE	4.289	17	1	3	1	54	6.1	10.01											3.92		2.31																		1		1
FALSE	High	Master Protein	A0A088AGG4	Uncharacterized protein OS=Apis mellifera OX=7460 GN=LOC726094 PE=4 SV=1		0	FALSE	6.212	4	3	3	3	829	94.5	6.54			4.84																				3
FALSE	High	Master Protein	A0A087ZPU0	Uncharacterized protein OS=Apis mellifera OX=7460 PE=3 SV=1	PREDICTED: Apis mellifera farnesol dehydrogenase (LOC412458), mRNA	0	FALSE	12.351	15	4	5	4	306	34.4	7.83											9.29																				4
FALSE	High	Master Protein	A0A088AGJ1	Uncharacterized protein OS=Apis mellifera OX=7460 GN=Atp5i PE=4 SV=1		0	FALSE	8.349	37	2	13	2	51	5.8	9.7	2.01		6.9	0				1.95	6.52	2.1	4.98										2		1	1				1	2	1	1
FALSE	High	Master Protein	A0A088AGJ8	Uncharacterized protein OS=Apis mellifera OX=7460 GN=LOC410620 PE=3 SV=1		0	FALSE	84.841	48	10	146	10	226	26.1	7.85	4.17	2.33	107.65	37.1	2.46	22.11		14.9	22.05	41.59	12.16	0	9.17	22.06	5.95	7.1			7.28		3	1	10	7	1	5		5	6	8	2	1	2	7
FALSE	High	Master Protein	A0A087ZSN2	Uncharacterized protein OS=Apis mellifera OX=7460 PE=3 SV=1	PREDICTED: Apis mellifera calcium-binding mitochondrial carrier protein Aralar1 (LOC408967), transcript variant X2, mRNA	0	FALSE	20.04	10	5	7	5	654	73	9.33	1.95		5.3								2		1.98								2		2								2		1
FALSE	High	Master Protein	A0A088AGR8	Uncharacterized protein OS=Apis mellifera OX=7460 GN=LOC410429 PE=4 SV=1		0	FALSE	123.748	46	16	61	16	431	48.3	6.54		5.7	116.15					17.76		6.18									0			2	16					6		4
FALSE	High	Master Protein	A0A087ZU87	Uncharacterized protein OS=Apis mellifera OX=7460 PE=3 SV=1	PREDICTED: Apis mellifera mitochondrial glutamate carrier 1 (LOC414011), transcript variant X1, mRNA	0	FALSE	57.932	55	5	62	5	122	13.9	8.32	19.56		44.09	5.96		8.28		3.22	33.74	9.9	18.47		13.47			0					4		4	4		3		1	5	2	3		1
FALSE	High	Master Protein	A0A087ZUE4	Uncharacterized protein OS=Apis mellifera OX=7460 PE=3 SV=1	PREDICTED: Apis mellifera bifunctional coenzyme A synthase (LOC552104), mRNA	0	FALSE	8.595	16	2	2	2	269	29.5	5.01	2.87																				2
FALSE	High	Master Protein	A0A088AGW2	Uncharacterized protein OS=Apis mellifera OX=7460 GN=LOC412127 PE=4 SV=1		0	FALSE	5.129	6	2	2	2	320	34.8	6.86			4.24																				2
FALSE	High	Master Protein	A0A087ZVG0	Uncharacterized protein OS=Apis mellifera OX=7460 PE=3 SV=1	PREDICTED: Apis mellifera very long-chain specific acyl-CoA dehydrogenase, mitochondrial (LOC412025), mRNA	0	FALSE	87.182	33	18	131	18	691	77.5	6.77	12.95	8.78	28.37	31.26	10.82	24.06		10.26	14.54	17.59	19.59			16.56	7.83	0		8.62	1.88		5	3	12	11	4	10		6	7	6	8			6
FALSE	High	Master Protein	A0A088AGY4	Uncharacterized protein OS=Apis mellifera OX=7460 PE=4 SV=1		0	FALSE	49.014	4	7	81	7	2303	261.3	6.1	6.07	0	17.69	11.87	9.64	31.16		14.33		26.43	3.58	19.07	3.55	35.11	3.69	0					1	1	3	2	1	5		3		5	1	2	1	6
FALSE	High	Master Protein	A0A087ZX44	Uncharacterized protein OS=Apis mellifera OX=7460 PE=3 SV=1	PREDICTED: Apis mellifera calpain-B (Calpb), transcript variant X1, mRNA	0	FALSE	13.524	5	5	10	5	881	100.3	6.1			8.52	0					0	3.27	0												4	1					1	2	1
FALSE	High	Master Protein	A0A087ZXE4	Uncharacterized protein OS=Apis mellifera OX=7460 PE=3 SV=1	PREDICTED: Apis mellifera 60S ribosomal protein L3 (LOC552445), mRNA	0	FALSE	6.426	3	3	5	2	705	80.4	8.25	0	1.68	0								0										1	1	1								1
FALSE	High	Master Protein	A0A088AH02	Uncharacterized protein OS=Apis mellifera OX=7460 PE=4 SV=1	PREDICTED: Apis mellifera leucine-rich repeat extensin-like protein 3 (LOC100577598), transcript variant X3, mRNA	0	FALSE	52.986	31	14	35	14	496	57.1	8.48			30.67	2.12				1.93	0		18.3							4.49					10	1				1	2		6
FALSE	High	Master Protein	A0A088AH38	Uncharacterized protein OS=Apis mellifera OX=7460 PE=4 SV=1		0.001	FALSE	3.198	2	1	1	1	541	59.8	7.84			1.84																				1
FALSE	High	Master Protein	A0A088AH41	Uncharacterized protein OS=Apis mellifera OX=7460 PE=4 SV=1		0	FALSE	94.943	40	18	53	18	621	71.6	7.3	17.46		39.71			0			0		42.48		2.1								8		11			1			2		16		1
FALSE	High	Master Protein	A0A088AH83	Uncharacterized protein OS=Apis mellifera OX=7460 GN=LOC412678 PE=3 SV=1	PREDICTED: Apis mellifera putative tricarboxylate transport protein, mitochondrial (LOC412678), mRNA	0	FALSE	16.997	9	5	15	5	655	75.1	7.34	1.76			5.64	6.02			1.73	0	4.83					4.11			2.82			1			2	1			1	2	1
FALSE	High	Master Protein	A0A088A395	Uncharacterized protein OS=Apis mellifera OX=7460 PE=3 SV=1	PREDICTED: Apis mellifera EH domain-containing protein 3 (LOC413012), mRNA	0	FALSE	5.097	5	1	9	1	223	25.5	7.11			0								2.17		2.01					0					1								1		1
FALSE	High	Master Protein	A0A088A448	Uncharacterized protein OS=Apis mellifera OX=7460 PE=3 SV=1	PREDICTED: Apis mellifera UMP-CMP kinase (LOC100578311), transcript variant X1, mRNA	0	FALSE	25.685	14	4	19	4	404	46.4	7.84				4.52		0			12.18	2.37			3.25	0										4		2			4	1			2	1
FALSE	High	Master Protein	A0A088AHB3	Uncharacterized protein OS=Apis mellifera OX=7460 PE=4 SV=1		0	FALSE	15.642	9	3	18	3	351	40.1	4.88			15.15	15.06	0			4.75	6.21							0							3	3	1			2	3
FALSE	High	Master Protein	A0A088A6T0	Uncharacterized protein OS=Apis mellifera OX=7460 PE=3 SV=1	PREDICTED: Apis mellifera dynamin (LOC410923), transcript variant X1, mRNA	0	FALSE	4.475	10	1	6	1	98	11.2	9.99			5.37	1.78					4.22	2.1													1	1					1	1
FALSE	High	Master Protein	A0A088A6Z4	Uncharacterized protein OS=Apis mellifera OX=7460 PE=3 SV=1	Apis mellifera NADH dehydrogenase (ubiquinone) Fe-S protein 1, 75kDa (NADH-coenzyme Q reductase) (Ndufs1), mRNA	0	FALSE	5.999	17	1	1	1	128	13.9	7.42																2.98
FALSE	High	Master Protein	A0A088AHC2	Uncharacterized protein OS=Apis mellifera OX=7460 GN=100577981 PE=4 SV=1	PREDICTED: Apis mellifera insulin-like growth factor-binding protein complex acid labile subunit (LOC100577981), mRNA	0	FALSE	8.89	4	1	3	1	318	36.8	6.13			1.65						4.23														1						1
FALSE	High	Master Protein	A0A088A7V7	Uncharacterized protein OS=Apis mellifera OX=7460 PE=3 SV=1	PREDICTED: Apis mellifera acetyl-CoA acetyltransferase, mitochondrial (LOC726218), mRNA	0	FALSE	42.553	29	10	24	10	455	52.4	6.38	2.16	11.1			0							0	0				6.85	7.09			3	4			1							3	2
FALSE	High	Master Protein	A0A088AHC3	Uncharacterized protein OS=Apis mellifera OX=7460 GN=Gp150 PE=4 SV=1		0	FALSE	125.14	44	23	125	23	613	68.3	7.4	25.87		98.13	9.03		5.02			33.24	8.92	54.67			2.25		0					11		21	3		3			16	6	15			2
FALSE	High	Master Protein	A0A088AHD0	Uncharacterized protein OS=Apis mellifera OX=7460 GN=102656594 PE=4 SV=1		0	FALSE	13.383	9	3	11	3	385	42.4	8.53	2.29		0						0		3.98		6.85					2.45			2		1						1		2		3
FALSE	High	Master Protein	A0A088ABS5	Uncharacterized protein OS=Apis mellifera OX=7460 PE=3 SV=1	PREDICTED: Apis mellifera probable methyltransferase-like protein 15 homolog (LOC724742), transcript variant X1, mRNA	0	FALSE	10.924	2	5	5	5	1980	228	5.53			7.93																				5
FALSE	High	Master Protein	A0A088AHD1	Uncharacterized protein OS=Apis mellifera OX=7460 PE=4 SV=1		0	FALSE	137.904	53	23	168	23	531	61.3	7.96	3.84	7.99	106.06	23.01	7.5	4.64		13.29	5.58	4.59	73.62		6.91	8.96	0	3.9	2.63	45.67	0	0	5	3	19	9	3	5		6	9	3	18		2	7
FALSE	High	Master Protein	A0A088AHD2	Uncharacterized protein OS=Apis mellifera OX=7460 GN=LOC726268 PE=4 SV=1		0	FALSE	64.917	26	16	75	14	655	72.4	5.34	22.89		21.62	25.03		18.92			8.61	6.54	10.87		6.21	1.61		0					11		6	9		8			10	3	4		3	2
FALSE	High	Master Protein	A0A088ACF4	Uncharacterized protein OS=Apis mellifera OX=7460 PE=3 SV=1	Apis mellifera heat shock 70 kDa protein cognate 3 (Hsc70-3), mRNA	0	FALSE	14.662	15	4	7	4	364	41.3	9.94	0		1.97								9.05										1		1								4
FALSE	High	Master Protein	A0A088ACI1	Uncharacterized protein OS=Apis mellifera OX=7460 PE=3 SV=1	PREDICTED: Apis mellifera protein ROP (LOC412924), transcript variant X1, mRNA	0.002	FALSE	2.812	4	1	1	1	185	22.1	10.83			1.98																				1
FALSE	High	Master Protein	A0A088AHE4	Uncharacterized protein OS=Apis mellifera OX=7460 GN=mRpL37 PE=4 SV=1		0	FALSE	22.38	26	7	9	7	274	32.4	9.52	2.18		0						0		10.16										1		1						1		5
FALSE	High	Master Protein	A0A088AD32	Uncharacterized protein OS=Apis mellifera OX=7460 PE=3 SV=1	PREDICTED: Apis mellifera lamin Dm0 (LOC413222), transcript variant X1, mRNA	0	FALSE	7.839	23	3	4	3	163	19.2	9.77	1.93										1.89										2										2
FALSE	High	Master Protein	A0A088ADQ6	Uncharacterized protein OS=Apis mellifera OX=7460 PE=3 SV=1	PREDICTED: Apis mellifera ribosomal protein S14 (Rps14), transcript variant X1, mRNA	0	FALSE	225.983	47	44	509	44	1060	122.6	9.14	87.53	2.05	149.24	36.66	18.44	57.72		18.49	21.53	74.71	139.15	1.68	114.7	23.12	50.92	27.56	3.46	47.05	0		28	2	30	15	9	26		8	11	19	36	1	24	13
FALSE	High	Master Protein	A0A088AHF1	Uncharacterized protein OS=Apis mellifera OX=7460 GN=mRpL14 PE=3 SV=1		0	FALSE	4.207	11	2	4	2	152	17.7	10.3			3.5								3.58												1								2
FALSE	High	Master Protein	A0A088ADS8	Uncharacterized protein OS=Apis mellifera OX=7460 PE=3 SV=1	PREDICTED: Apis mellifera lysosome-associated membrane glycoprotein 1 (LOC409495), mRNA	0	FALSE	23.265	28	4	29	4	201	23.3	5.92	11.81		20.3	0		3.21		0	10.87	1.62	17.71			0							2		3	1		2		1	3	1	3			1
FALSE	High	Master Protein	A0A088AHF8	Uncharacterized protein OS=Apis mellifera OX=7460 GN=LOC552253 PE=3 SV=1	PREDICTED: Apis mellifera mitochondrial chaperone BCS1 (LOC552253), mRNA	0.001	FALSE	3.38	4	1	7	1	338	38.1	7.01						0			2.55	2.7	2.89		2.67	2.48												1			1	1	1		1	1
FALSE	High	Master Protein	A0A088AHG5	Uncharacterized protein OS=Apis mellifera OX=7460 PE=3 SV=1		0.001	FALSE	3.882	9	1	3	1	112	12.8	9.61			0							0	0												1							1	1
FALSE	High	Master Protein	A0A088AHK1	Uncharacterized protein OS=Apis mellifera OX=7460 GN=LOC552143 PE=4 SV=1		0	FALSE	115.231	50	18	227	1	495	54.4	7.3	23.99	37.22	8.67	16.08	39.33	9.99	9.28	5.24	9.55	3.15	24.81	58.08	61.08	0			38.04	202.76	0		8	9	3	5	8	6	2	1	5	2	8	11	12	2
FALSE	High	Master Protein	A0A088AHQ5	Uncharacterized protein OS=Apis mellifera OX=7460 GN=RpL23 PE=3 SV=1		0	FALSE	7.278	9	2	4	2	315	36.4	7.01	0		4.31								0										1		2								1
FALSE	High	Master Protein	A0A088AGW1	Uncharacterized protein OS=Apis mellifera OX=7460 PE=3 SV=1	PREDICTED: Apis mellifera 40S ribosomal protein S27 (LOC726295), transcript variant X2, mRNA	0	FALSE	4.979	18	2	2	2	129	13.9	10.61									0		2																		1		1
FALSE	High	Master Protein	A0A088AH97	Uncharacterized protein OS=Apis mellifera OX=7460 PE=3 SV=1	PREDICTED: Apis mellifera scavenger receptor class B member 1 (LOC409228), transcript variant X2, mRNA	0	FALSE	56.797	21	8	51	8	413	46.6	8.54	5.57		61.92	13.28		4.58		2.79	13.79	10.7	3.02			2.45		2.19					2		8	5		2		1	3	3	1			1
FALSE	High	Master Protein	A0A088AHX1	Uncharacterized protein OS=Apis mellifera OX=7460 GN=100578731 PE=4 SV=1		0	FALSE	65.369	20	12	105	12	595	67.6	8.09	15.59	6.87	42.34		9.72	1.63	1.8	15.03	3.58	0	22.59	6.33	27.81	4.12	9.04	0	5.1	13.63	2.12	2	7	2	11		5	3	1	9	3	1	5	2	8	3
FALSE	High	Master Protein	A0A088AHY7	Uncharacterized protein OS=Apis mellifera OX=7460 GN=LOC411366 PE=4 SV=1		0	FALSE	16.835	19	3	5	3	180	20.4	5.71			2.57								7.47			0									1								2			1
FALSE	High	Master Protein	A0A088AI17	Uncharacterized protein OS=Apis mellifera OX=7460 PE=4 SV=1		0	FALSE	171.704	52	25	178	25	681	76	8.37	25.25		142.41	6.49	2.03	10.1		0	45.62	10.65	77.85		2.44	3.86		0		2.12		0	12		24	7	2	9		2	19	6	19		2	4
FALSE	High	Master Protein	A0A088AI44	Uncharacterized protein OS=Apis mellifera OX=7460 PE=3 SV=1		0	FALSE	15.491	32	6	7	6	244	26.2	9.44	1.83		9.51								0										1		5								1
FALSE	High	Master Protein	A0A088AJE2	Uncharacterized protein OS=Apis mellifera OX=7460 PE=3 SV=1	PREDICTED: Apis mellifera myosin heavy chain, muscle (LOC409843), transcript variant X12, mRNA	0	FALSE	7.899	17	2	2	2	174	20.5	4.5		0																2.57				1
FALSE	High	Master Protein	A0A088AI70	Uncharacterized protein OS=Apis mellifera OX=7460 PE=4 SV=1		0	FALSE	111.456	37	21	149	11	658	71.7	5.58	9.82	62.08	22.64	42.23		9.31	4.64	8.13	15.69	8.83	11.93	1.88	29.56	1.98	4.14	1.99	20.84	54.74			4	11	8	14		3	1	4	13	5	6	1	9	5
FALSE	High	Master Protein	A0A088AI74	Uncharacterized protein OS=Apis mellifera OX=7460 PE=4 SV=1		0	FALSE	17.573	14	4	6	4	387	42.6	6.01		2.56	5.23					8.84														1	1					3
FALSE	High	Master Protein	A0A088AR30	Uncharacterized protein OS=Apis mellifera OX=7460 PE=3 SV=1	PREDICTED: Apis mellifera probable leucine--tRNA ligase, mitochondrial (LOC552532), transcript variant X1, mRNA	0	FALSE	37.463	41	7	31	7	237	27.8	7.9	1.93	2.8	1.91	0	5.19			12.04			9.52		3.74	0	6.75		0	5.55			1	1	1	1	2			4			6		1	1
FALSE	High	Master Protein	A0A088AIG1	Uncharacterized protein OS=Apis mellifera OX=7460 GN=Tim17 PE=4 SV=1		0	FALSE	7.105	2	2	7	2	909	101.7	8.25				2.59		2.28			2.55	2.8	2.91			0				1.37						1		1			1	1	1			1
FALSE	High	Master Protein	A0A088AIJ6	Uncharacterized protein OS=Apis mellifera OX=7460 GN=mRpL47 PE=4 SV=1	PREDICTED: Apis mellifera 39S ribosomal protein L47, mitochondrial (LOC413774), mRNA	0	FALSE	3.679	6	2	2	2	390	44.8	7.34													1.75																				2
FALSE	High	Master Protein	A0A088AIK9	Uncharacterized protein OS=Apis mellifera OX=7460 GN=Cyp4g11 PE=3 SV=1		0	FALSE	42.979	22	7	77	7	311	35.8	7.05	5.74	1.74	11.15	9.08	3.8	6.86		0	23.56	8.91	23.92	0	3.47	5.98	1.83	1.89	1.81		0		2	1	3	6	1	3		1	7	5	7	1	1	4
FALSE	High	Master Protein	A0A088AT41	Uncharacterized protein OS=Apis mellifera OX=7460 PE=3 SV=1	PREDICTED: Apis mellifera digestive cysteine proteinase 1 (LOC409517), mRNA	0	FALSE	9.056	14	2	3	2	235	27.4	8.79			7.77	0																			2	1
FALSE	High	Master Protein	A0A088AIQ8	Uncharacterized protein OS=Apis mellifera OX=7460 PE=4 SV=1	PREDICTED: Apis mellifera putative mediator of RNA polymerase II transcription subunit 26 (LOC113218918), transcript variant X3, mRNA	0	FALSE	44.305	29	12	45	12	534	60.9	6.83	5.47		12.58	6.3		3.67			3.61	2.26	11.65		4.04	0		3.37	1.63	11.82			4		5	2		2			4	3	6		1	1
FALSE	High	Master Protein	A0A088AIT1	Uncharacterized protein OS=Apis mellifera OX=7460 PE=4 SV=1		0	FALSE	4.887	3	2	5	2	758	88.1	4.91				0				1.62			2.23		2.69											1				1			2		1
FALSE	High	Master Protein	A0A088AJ33	Uncharacterized protein OS=Apis mellifera OX=7460 PE=3 SV=1	PREDICTED: Apis mellifera mitochondrial ribosomal protein S11 (LOC410678), mRNA	0	FALSE	27.681	28	10	26	6	430	49	8.92	4.14		12.89	0		0			1.82	1.68	9.42										3		6	2		1			3	1	4
FALSE	High	Master Protein	A0A088AJ35	Uncharacterized protein OS=Apis mellifera OX=7460 GN=mRpS17 PE=4 SV=1	PREDICTED: Apis mellifera 28S ribosomal protein S17, mitochondrial (LOC551158), mRNA	0	FALSE	6.612	6	2	3	2	431	49.6	8.81			4.92																				2
FALSE	High	Master Protein	A0A088AVB4	Uncharacterized protein OS=Apis mellifera OX=7460 PE=3 SV=1	PREDICTED: Apis mellifera cytochrome P450 9e2 (LOC724211), mRNA	0	FALSE	4.009	1	1	6	1	1992	219.6	8.48				1.94					2.35	3.53	1.81													1					1	1	1
FALSE	High	Master Protein	A0A088AJ39	Uncharacterized protein OS=Apis mellifera OX=7460 GN=RpL13A PE=3 SV=1		0	FALSE	31.222	17	6	13	6	541	60.4	9.17	2.12		20.05			1.71			0		2.27										1		6			1			1		1
FALSE	High	Master Protein	A0A088AJ54	Uncharacterized protein OS=Apis mellifera OX=7460 GN=LOC725239 PE=4 SV=1		0	FALSE	9.971	24	3	7	3	168	18.7	10.49	3.46		0								7.73										3		1								3
FALSE	High	Master Protein	A0A088AJ60	Uncharacterized protein OS=Apis mellifera OX=7460 GN=100576258 PE=4 SV=1		0.007	FALSE	2.392	3	1	4	1	311	35.4	10.15			1.98	3.41																			1	1
FALSE	High	Master Protein	A0A088AJ80	Uncharacterized protein OS=Apis mellifera OX=7460 PE=4 SV=1		0	FALSE	87.285	32	23	71	23	869	101.7	8.44	3.88		46.65	3.76					3.56	2.25	37.44		1.93								10		14	2					4	4	17		2
FALSE	High	Master Protein	A0A087ZNG2	Uncharacterized protein OS=Apis mellifera OX=7460 PE=4 SV=1	PREDICTED: Apis mellifera transcriptional activator protein Pur-beta (LOC726399), transcript variant X1, mRNA	0	FALSE	4.105	10	1	1	1	105	11.7	6.28			2.74																				1
FALSE	High	Master Protein	A0A088AJB4	Uncharacterized protein OS=Apis mellifera OX=7460 GN=mRpS6 PE=4 SV=1		0	FALSE	4.866	4	2	3	2	595	65.9	8.19													3.98					2.3															2
FALSE	High	Master Protein	A0A088AJD7	Uncharacterized protein OS=Apis mellifera OX=7460 PE=3 SV=1	PREDICTED: Apis mellifera 4-aminobutyrate aminotransferase, mitochondrial (LOC408955), transcript variant X1, mRNA	0	FALSE	101.766	42	20	63	20	501	55	8.4	28.55		31.05			4.61			0		58.19			0		2.06					11		10			5			1		17			1
FALSE	High	Master Protein	A0A088AJK4	Uncharacterized protein OS=Apis mellifera OX=7460 PE=4 SV=1	PREDICTED: Apis mellifera ribonuclease Z, mitochondrial (LOC726874), transcript variant X1, mRNA	0	FALSE	39.124	49	7	124	1	129	14.5	7.78	29.18		39.96	18.36	8.31	21.56		2.1	14.45	21.68	21.17		13.04	9.51	13.9	12.34	13.09	10.89	6.65	2.54	5		5	4	2	4		1	4	4	3		3	2
FALSE	High	Master Protein	A0A087ZP01	Uncharacterized protein OS=Apis mellifera OX=7460 PE=4 SV=1	PREDICTED: Apis mellifera cytochrome c oxidase subunit 7C, mitochondrial (LOC726297), mRNA	0	FALSE	20.112	17	3	59	3	162	18	5.74	8.78	2.06	7.87	7.93	4.15	6.49		8.72	11.85	6.93	13.77	1.73	7.26	9.33	15.12		2.28		2.6	2.38	2	1	2	1	1	2		1	3	1	2	1	1	3
FALSE	High	Master Protein	A0A088AJL9	Uncharacterized protein OS=Apis mellifera OX=7460 GN=Mhc2 PE=3 SV=1		0	FALSE	25.243	32	7	19	7	266	29.4	9.6	0		26.49						0		5.9										1		7						1		3
FALSE	High	Master Protein	A0A088AJU4	Uncharacterized protein OS=Apis mellifera OX=7460 GN=GMCOX1 PE=3 SV=1	PREDICTED: Apis mellifera glucose dehydrogenase [FAD, quinone] (LOC410748), transcript variant X3, mRNA	0	FALSE	36.646	16	7	42	7	524	59.5	8.95	8.12		9.46	0		3.83			5.24	0	25.37			0		0					3		2	2		4			3	1	7			2
FALSE	High	Master Protein	A0A088AJU6	Uncharacterized protein OS=Apis mellifera OX=7460 GN=GMCOX3 PE=4 SV=1	PREDICTED: Apis mellifera glucose dehydrogenase [FAD, quinone] (LOC410747), transcript variant X2, mRNA	0	FALSE	135.113	51	20	297	20	423	48.8	5.85	29.25	40.96	15.58	8.53	1.67	29.64	4.03	16.25	23.69	6.85	12.92	0	34.19	20.06	1.7	0	6.12	494.88	0		7	7	3	6	1	12	2	5	8	2	2	1	8	6
FALSE	High	Master Protein	A0A087ZQM3	Uncharacterized protein OS=Apis mellifera OX=7460 PE=4 SV=1	PREDICTED: Apis mellifera 39S ribosomal protein L12, mitochondrial (LOC409926), mRNA	0	FALSE	24.309	57	7	53	7	135	15.7	9.44	7.46		2.54		0	10.19		0		3.77	5.62	0		11.05	8.56			0	0	0	5		4		2	5		1		3	3	1		6
FALSE	High	Master Protein	A0A088AJU9	Uncharacterized protein OS=Apis mellifera OX=7460 GN=GMCOX6 PE=3 SV=1		0	FALSE	30.076	11	5	43	5	573	62.9	6.62	1.84	9.26	20.42	0	10.96			15.08		8.67	13.45	0	11.49		2.11			5.65			1	2	3	1	2			4		3	2	3	3
FALSE	High	Master Protein	A0A088AK95	Uncharacterized protein OS=Apis mellifera OX=7460 GN=LOC552190 PE=4 SV=1		0	FALSE	9.088	1	4	6	4	3368	386.7	6.49			4.69	0					0	0													2	1					2	1
FALSE	High	Master Protein	A0A088AKA7	Uncharacterized protein OS=Apis mellifera OX=7460 PE=4 SV=1		0	FALSE	157.69	71	20	298	20	311	36.9	7.83	123.37	0	162.55	27.97	6.67	54.11	1.66	5.79	59.55	28.79	147.68	0	15.69	22.32	0	0		4.62	2		17	2	16	9	2	12	1	6	12	7	18	1	4	9
FALSE	High	Master Protein	A0A088AKC1	Uncharacterized protein OS=Apis mellifera OX=7460 PE=4 SV=1		0	FALSE	51.949	13	13	32	13	1309	143.5	4.91			19.97	11.51	7.85					7.15		1.79			1.63		5.89						6	7	3					6		2
FALSE	High	Master Protein	A0A087ZTX6	Uncharacterized protein OS=Apis mellifera OX=7460 PE=4 SV=1	PREDICTED: Apis mellifera extensin (LOC102655819), mRNA	0.001	FALSE	3.011	2	1	2	1	718	78.7	7.42																	0	2.25
FALSE	High	Master Protein	A0A088AKM4	Uncharacterized protein OS=Apis mellifera OX=7460 GN=CREG PE=4 SV=1	PREDICTED: Apis mellifera protein CREG1 (LOC551913), mRNA	0	FALSE	11.626	34	3	5	3	131	14.8	9.39	0								2.67					1.87				0			1								1					1
FALSE	High	Master Protein	A0A088AL08	Uncharacterized protein OS=Apis mellifera OX=7460 PE=4 SV=1	PREDICTED: Apis mellifera mitochondrial-processing peptidase subunit alpha (LOC552175), mRNA	0	FALSE	4.914	4	1	14	1	245	28	7.37	2.64		2.72	2.96	2.14	0			2.5	5.34	5.14			2.46	2.21						1		1	1	1	1			1	1	1			1
FALSE	High	Master Protein	A0A087ZUR2	Uncharacterized protein OS=Apis mellifera OX=7460 PE=4 SV=1	PREDICTED: Apis mellifera cuticular protein 10 (LOC100579047), mRNA	0	FALSE	34.436	24	5	93	5	290	33.7	7.55	12.21	9.64		17.88	11.63	5.17	3.8	3.67	2.01	6.13	6.37	14.94	15.12	2.55			14	97.3			2	3		5	2	2	2	1	2	2	3	3	3	2
FALSE	High	Master Protein	A0A088AL67	Uncharacterized protein OS=Apis mellifera OX=7460 PE=4 SV=1		0	FALSE	12.031	2	5	5	5	2872	325.5	6.47			1.77		2.09								0										1		3								1
FALSE	High	Master Protein	A0A088AL69	Uncharacterized protein OS=Apis mellifera OX=7460 PE=4 SV=1		0	FALSE	29.601	24	7	11	7	523	58.7	8.13	2.26		2.69			0					11.76										1		1			1					6
FALSE	High	Master Protein	A0A088ALH6	Uncharacterized protein OS=Apis mellifera OX=7460 GN=Fim PE=4 SV=1		0	FALSE	7.858	27	3	7	3	172	20.5	7.39										0	0							9.64												1	1
FALSE	High	Master Protein	A0A088ALJ6	Uncharacterized protein OS=Apis mellifera OX=7460 GN=100578730 PE=4 SV=1		0.002	FALSE	2.765	8	1	1	1	97	11.3	4.92			2.01																				1
FALSE	High	Master Protein	A0A088ALL7	Uncharacterized protein OS=Apis mellifera OX=7460 GN=LOC726747 PE=4 SV=1		0	FALSE	29.999	34	6	29	6	177	19.8	8.15			13.36		10.47	0		1.93	5.29	4.03	1.92		4.24		1.8				2.13	0			3		3	1		2	4	2	1		2
FALSE	High	Master Protein	A0A088ALN1	Uncharacterized protein OS=Apis mellifera OX=7460 GN=LOC725165 PE=3 SV=1	PREDICTED: Apis mellifera aquaporin AQPAe.a (LOC725165), transcript variant X3, mRNA	0	FALSE	59.181	37	6	17	6	379	37.8	5.49	56.24																				6
FALSE	High	Master Protein	A0A088ALR8	Uncharacterized protein OS=Apis mellifera OX=7460 PE=4 SV=1		0	FALSE	9.11	5	2	4	2	530	61.2	8.69									2.45																				2
FALSE	High	Master Protein	A0A088ALU6	Uncharacterized protein OS=Apis mellifera OX=7460 PE=4 SV=1		0	FALSE	64.565	21	12	79	12	767	88.9	7.97	16.68		26.78	11.23	12.38	12.06		0	26.7	5.27	7.37		6.48	4.8	5.1						7		7	5	4	5		1	8	4	6		5	2
FALSE	High	Master Protein	A0A088AM30	Uncharacterized protein OS=Apis mellifera OX=7460 GN=ATPsyn-Cf6 PE=4 SV=1		0	FALSE	6.28	3	3	3	3	1372	152.3	7.05						0									0											1
FALSE	High	Master Protein	A0A088AM52	Uncharacterized protein OS=Apis mellifera OX=7460 PE=4 SV=1		0	FALSE	11.718	12	4	8	4	324	35.4	7.17				6.5					6.65							0								2					4
FALSE	High	Master Protein	A0A088AM53	Uncharacterized protein OS=Apis mellifera OX=7460 PE=4 SV=1	PREDICTED: Apis mellifera monocarboxylate transporter 9 (LOC552202), transcript variant X3, mRNA	0	FALSE	15.147	9	6	17	6	696	78.9	6.25	1.62		6.19							7.35	4.56		1.92		12.15						2		3							3	2		1
FALSE	High	Master Protein	A0A088AM57	Uncharacterized protein OS=Apis mellifera OX=7460 PE=4 SV=1	Apis mellifera selenium-binding protein 1-like (LOC551434), mRNA	0	FALSE	477.467	38	92	1185	92	2718	314.8	5.71	7.11	224.37	140.55	65.61	82.56	48.55	114.06	83.48	9.79	40.07	216.9	126.78	260.85	61.24	73.94	3.99	270.85	340.08	64.27		7	47	43	33	31	43	27	35	9	18	63	37	59	42
FALSE	High	Master Protein	A0A088AMA7	Uncharacterized protein OS=Apis mellifera OX=7460 GN=LOC410539 PE=3 SV=1		0	FALSE	8.438	2	4	8	4	1695	189.8	8.28			5.89		1.89			1.81					1.72										3		2			2					1
FALSE	High	Master Protein	A0A087ZWF7	Uncharacterized protein OS=Apis mellifera OX=7460 PE=4 SV=1	PREDICTED: Apis mellifera alpha-actinin, sarcomeric (LOC725782), transcript variant X6, mRNA	0	FALSE	23.116	29	6	35	6	209	23.6	9.16	14.24			10.94		1.66			7.3	4.63	8.14		4.13			1.79		11.54			6			3		2			3	3	3		2
FALSE	High	Master Protein	A0A088AMC6	Uncharacterized protein OS=Apis mellifera OX=7460 PE=4 SV=1		0	FALSE	6.469	29	2	2	2	62	7.2	8.72			2.9		2.47																		1		1
FALSE	High	Master Protein	A0A088AMD5	Uncharacterized protein OS=Apis mellifera OX=7460 GN=SdhC PE=4 SV=1	PREDICTED: Apis mellifera succinate dehydrogenase cytochrome b560 subunit, mitochondrial (LOC409549), mRNA	0	FALSE	41.552	36	6	126	6	239	26.5	5.9	13.7		20.71	15.85	21.81	6.96		19.86	31.4	27.5	9.2		15.1	4.24	2.34	2.88			2.39		4		5	5	4	3		4	6	6	2		2	3
FALSE	High	Master Protein	A0A088AMG7	Uncharacterized protein OS=Apis mellifera OX=7460 GN=RpL22 PE=4 SV=1		0	FALSE	3.679	2	1	1	1	512	60.6	9.14											2.24																				1
FALSE	High	Master Protein	A0A087ZX89	Uncharacterized protein OS=Apis mellifera OX=7460 PE=4 SV=1	PREDICTED: Apis mellifera hemicentin-2 (LOC412893), transcript variant X1, mRNA	0.001	FALSE	3.312	4	1	19	1	207	21.6	9.03	2.01		3.75	0		1.69		1.64	1.93	0	2.07			0	2.17						1		1	1		1		1	1	1	1			1
FALSE	High	Master Protein	A0A087ZXC7	Uncharacterized protein OS=Apis mellifera OX=7460 PE=4 SV=1	PREDICTED: Apis mellifera pentatricopeptide repeat-containing protein 2, mitochondrial (LOC552071), mRNA	0	FALSE	5.777	7	3	9	3	537	62.4	9.74			0			1.71						0		1.64			0	1.85					1			1						1		2
FALSE	High	Master Protein	A0A088AMW9	Uncharacterized protein OS=Apis mellifera OX=7460 PE=4 SV=1	PREDICTED: Apis mellifera protein mesh (LOC408878), transcript variant X1, mRNA	0.001	FALSE	3.108	3	1	1	1	597	67.3	8.5			2.28																				1
FALSE	High	Master Protein	A0A087ZXG4	Uncharacterized protein OS=Apis mellifera OX=7460 PE=4 SV=1	PREDICTED: Apis mellifera mucin-19 (LOC102653655), transcript variant X1, mRNA	0	FALSE	119.475	43	18	95	18	570	60.4	5.83	27.79		60.04	23.61		18.38			12.47	4.19	32.48			0		2.79					9		12	8		10			7	2	11			2
FALSE	High	Master Protein	A0A087ZXX3	Uncharacterized protein OS=Apis mellifera OX=7460 PE=4 SV=1	PREDICTED: Apis mellifera thioredoxin-like protein 1 (LOC550734), mRNA	0.002	FALSE	2.85	2	1	3	1	493	56.6	7.24	0			0					2.03												1			1					1
FALSE	High	Master Protein	A0A087ZY95	Uncharacterized protein OS=Apis mellifera OX=7460 PE=4 SV=1	PREDICTED: Apis mellifera basement membrane-specific heparan sulfate proteoglycan core protein (LOC409722), transcript variant X13, mRNA	0	FALSE	13.015	8	3	4	3	534	57.9	6.64	2.28					2.09			5.15												1					1			2
FALSE	High	Master Protein	A0A088AN00	Uncharacterized protein OS=Apis mellifera OX=7460 PE=4 SV=1		0	FALSE	4.567	5	1	1	1	279	32.2	4.75			3.02																				1
FALSE	High	Master Protein	A0A088AN06	Uncharacterized protein OS=Apis mellifera OX=7460 GN=LOC552727 PE=4 SV=1		0	FALSE	21.1	8	2	4	2	406	43.9	8.9			10.24								0												2								1
FALSE	High	Master Protein	A0A088AN29	Uncharacterized protein OS=Apis mellifera OX=7460 GN=LOC551541 PE=4 SV=1		0	FALSE	30.375	16	6	9	6	506	56.9	5.83			24.06																				6
FALSE	High	Master Protein	A0A087ZYV1	Uncharacterized protein OS=Apis mellifera OX=7460 PE=4 SV=1	PREDICTED: Apis mellifera short stop (LOC408779), transcript variant X1, mRNA	0	FALSE	45.302	25	15	34	15	727	80.5	6.93	9.82		18.12	0		3.74			0		14.13			1.65		0					6		8	1		4			1		6			2
FALSE	High	Master Protein	A0A087ZZ55	Uncharacterized protein OS=Apis mellifera OX=7460 PE=4 SV=1	PREDICTED: Apis mellifera nidogen-2 (LOC408797), mRNA	0	FALSE	238.768	51	29	241	29	764	84.3	9.01	75.45		183.54	16.84	6.07	29.13		3.32	29.73	8.94	145.42		9.36	11.93	2.13	4.38					20		23	7	2	14		1	12	2	22		2	7
FALSE	High	Master Protein	A0A087ZZ70	Uncharacterized protein OS=Apis mellifera OX=7460 PE=4 SV=1	PREDICTED: Apis mellifera filamin-like (LOC409697), transcript variant X1, mRNA	0	FALSE	6.816	6	1	18	1	244	26.9	5.83	4.84	5.58	5.52	1.98	1.95	0		0		0	5.31	0	2.27	0							1	1	1	1	1	1		1		1	1	1	1	1
FALSE	High	Master Protein	A0A087ZZB0	Uncharacterized protein OS=Apis mellifera OX=7460 PE=4 SV=1	PREDICTED: Apis mellifera spectrin beta chain, non-erythrocytic 5 (LOC413332), transcript variant X1, mRNA	0	FALSE	10.286	10	3	4	3	327	37.3	9.31			7.49																				3
FALSE	High	Master Protein	A0A087ZZY4	Uncharacterized protein OS=Apis mellifera OX=7460 PE=4 SV=1	PREDICTED: Apis mellifera protein anoxia up-regulated-like (LOC113218812), transcript variant X1, mRNA	0	FALSE	15.07	15	4	15	4	317	36.1	9.28		0	5.69		0						1.74		2.6					8.08				1	2		1						2		2
FALSE	High	Master Protein	A0A088AN33	Uncharacterized protein OS=Apis mellifera OX=7460 GN=SCR-B6 PE=3 SV=1	PREDICTED: Apis mellifera protein croquemort (LOC410982), transcript variant X2, mRNA	0.009	FALSE	2.318	10	1	3	1	143	17.1	8.16		2.44						0														1						1
FALSE	High	Master Protein	A0A088A0K0	Uncharacterized protein OS=Apis mellifera OX=7460 PE=4 SV=1	PREDICTED: Apis mellifera basigin (LOC726060), mRNA	0.003	FALSE	2.669	1	1	1	1	1194	135.1	6.83				0																				1
FALSE	High	Master Protein	A0A088A174	Uncharacterized protein OS=Apis mellifera OX=7460 PE=4 SV=1	PREDICTED: Apis mellifera selenide, water dikinase (LOC410258), mRNA	0	FALSE	7.93	8	2	5	2	381	42	6.6				2.14		1.72			4.03															1		1			2
FALSE	High	Master Protein	A0A088AN57	Uncharacterized protein OS=Apis mellifera OX=7460 PE=4 SV=1		0	FALSE	3.715	8	1	1	1	131	15.5	9.99									1.91																				1
FALSE	High	Master Protein	A0A088AN65	Uncharacterized protein OS=Apis mellifera OX=7460 PE=3 SV=1		0	FALSE	21.927	25	6	15	6	330	37.5	9.92	2.42		8.56	2.83		0		2.96			6.01		5.63					3.68			2		2	2		2		1			2		2
FALSE	High	Master Protein	A0A088AN82	Uncharacterized protein OS=Apis mellifera OX=7460 PE=4 SV=1		0	FALSE	28.767	43	4	13	4	161	16.6	7.2	26.47																		7.28		4
FALSE	High	Master Protein	A0A088ANA7	Uncharacterized protein OS=Apis mellifera OX=7460 PE=4 SV=1	PREDICTED: Apis mellifera 28S ribosomal protein S31, mitochondrial (LOC727055), mRNA	0.006	FALSE	2.452	2	1	3	1	563	65.3	9.54				1.73					1.67															1					1
FALSE	High	Master Protein	A0A088A1H4	Uncharacterized protein OS=Apis mellifera OX=7460 PE=4 SV=1	PREDICTED: Apis mellifera fibrillin-2 (LOC100577456), transcript variant X2, mRNA	0	FALSE	4.813	12	2	2	2	200	22.5	9.85			4.1																				2
FALSE	High	Master Protein	A0A088AND1	Uncharacterized protein OS=Apis mellifera OX=7460 PE=4 SV=1	PREDICTED: Apis mellifera flocculation protein FLO11 (LOC727165), mRNA	0	FALSE	24.292	27	5	57	5	289	32.2	5.02			28.03	0	28.64	2.19		7.85	0	5.01	8.14		11.63		2.15								4	1	4	1		2	1	2	3		3
FALSE	High	Master Protein	A0A088AND4	Uncharacterized protein OS=Apis mellifera OX=7460 GN=Apd-2 PE=4 SV=1		0	FALSE	15.053	1	4	9	4	6182	662.9	6.27				9.52					4.85	1.6														3					3	1
FALSE	High	Master Protein	A0A088ANK4	Uncharacterized protein OS=Apis mellifera OX=7460 PE=4 SV=1		0.001	FALSE	3.866	0	1	2	1	6888	768.5	5.34				1.67					1.75															1					1
FALSE	High	Master Protein	A0A088ANM8	Uncharacterized protein OS=Apis mellifera OX=7460 GN=RpS17 PE=3 SV=1		0	FALSE	8.836	14	2	19	2	160	17.5	8.24	2.45		9.98	2.16	2.33	2.28		2.1	4.76	6.96	2.17		0	0	2.33						1		2	1	1	1		1	1	2	1		1	1
FALSE	High	Master Protein	A0A088ANN2	Uncharacterized protein OS=Apis mellifera OX=7460 GN=LOC412319 PE=4 SV=1	PREDICTED: Apis mellifera rhomboid-related protein 2 (LOC412319), transcript variant X1, mRNA	0	FALSE	38.103	3	10	41	10	4124	477.8	6.19	4.07	1.91	6.5	7.18		3.37			12.5	0	7.04		0	3.32	0		5.11	1.77			2	1	3	3		2			6	1	4		1	1
FALSE	High	Master Protein	A0A088ANT4	Uncharacterized protein OS=Apis mellifera OX=7460 PE=4 SV=1		0	FALSE	5.38	16	1	7	1	100	10.8	4.78		2.5						0		0		2.29	2.53									1						1		1		1	1
FALSE	High	Master Protein	A0A088ANZ0	Uncharacterized protein OS=Apis mellifera OX=7460 GN=LOC551093 PE=3 SV=1		0.008	FALSE	2.327	16	1	2	1	73	8	8				0					0															1					1
FALSE	High	Master Protein	A0A088A4B1	Uncharacterized protein OS=Apis mellifera OX=7460 PE=4 SV=1	PREDICTED: Apis mellifera sodium/potassium-transporting ATPase subunit beta-2 (LOC725991), mRNA	0	FALSE	9.481	14	2	2	2	187	21.7	6.77									2.64																				2
FALSE	High	Master Protein	A0A088A4K9	Uncharacterized protein OS=Apis mellifera OX=7460 PE=4 SV=1	Apis mellifera odorant binding protein 14 (Obp14), mRNA	0	FALSE	8.488	8	3	3	3	395	45.7	8.29			0								2.22												1								2
FALSE	High	Master Protein	A0A088ANZ8	Uncharacterized protein OS=Apis mellifera OX=7460 GN=SORL1 PE=4 SV=1	PREDICTED: Apis mellifera sortilin-related receptor (LOC408987), mRNA	0.003	FALSE	2.531	9	1	1	1	125	13.8	7.42								0																				1
FALSE	High	Master Protein	A0A088APP1	Uncharacterized protein OS=Apis mellifera OX=7460 PE=3 SV=1		0	FALSE	5.589	8	2	5	2	227	26.2	8.84				0					0								2.17	2.22						1					1
FALSE	High	Master Protein	A0A088APU4	Uncharacterized protein OS=Apis mellifera OX=7460 GN=551215 PE=4 SV=1		0.002	FALSE	2.938	2	1	4	1	581	63.3	9.7	0					0								0	1.7						1					1								1
FALSE	High	Master Protein	A0A088APV8	Uncharacterized protein OS=Apis mellifera OX=7460 GN=LOC552590 PE=4 SV=1		0	FALSE	5.225	13	1	4	1	97	10.3	4.89	2.49					2.81					2.3			2.34							1					1					1			1
FALSE	High	Master Protein	A0A088APW3	Uncharacterized protein OS=Apis mellifera OX=7460 GN=fax PE=4 SV=1		0	FALSE	20.467	23	5	10	5	341	40.3	6.92	4.58		3			0					12.62					0					2		2			1					4
FALSE	High	Master Protein	A0A088A5N6	Uncharacterized protein OS=Apis mellifera OX=7460 PE=4 SV=1	PREDICTED: Apis mellifera laminin subunit gamma-1 (LOC409474), mRNA	0	FALSE	197.354	61	20	554	1	376	41.8	5.48	117.9	6.39	175.28	106.13	16.31	81.55		21.84	66.28	87.82	80.34	6.26	39.45	42.01	44.36	209.39	33.61	23.13	26.47	12.39	15	2	14	14	5	13		7	12	12	10	3	7	11
FALSE	High	Master Protein	A0A088APW5	Uncharacterized protein OS=Apis mellifera OX=7460 GN=LOC726147 PE=4 SV=1		0	FALSE	25.457	31	6	11	6	326	39.2	5.6	2.17		1.71								10.99										4		1								4
FALSE	High	Master Protein	A0A088APY4	Uncharacterized protein OS=Apis mellifera OX=7460 PE=4 SV=1		0	FALSE	37.452	2	11	25	11	23421	2662.1	5.47		1.77		1.68		0						10.72				4.74	16.31	5.58				1		5		1						4
FALSE	High	Master Protein	A0A088A656	Uncharacterized protein OS=Apis mellifera OX=7460 PE=4 SV=1	PREDICTED: Apis mellifera papilin (LOC413021), transcript variant X1, mRNA	0	FALSE	4.52	5	2	2	2	206	21.9	9.41			4.12																				2
FALSE	High	Master Protein	A0A088AQ34	Uncharacterized protein OS=Apis mellifera OX=7460 GN=Cox6a1 PE=3 SV=1		0	FALSE	85.611	57	5	389	5	134	15	6.07	7.7	13.1	37.64			40.67		123.22		68.96	2.29	31.95		0	29.97	561.68	13.82		108.02		1	1	3			3		4		4	1	3		1
FALSE	High	Master Protein	A0A088A6M3	Uncharacterized protein OS=Apis mellifera OX=7460 PE=4 SV=1	PREDICTED: Apis mellifera translocon-associated protein subunit alpha (LOC551353), mRNA	0	FALSE	501.002	44	38	1953	38	824	93.7	6.27	424.1	31.66	517.37	271.4	374.88	295.04	10.24	237.11	338	184.92	342.61	15.81	243.06	169.38	164.79	166.86	31.11	60.2	250.64	51.14	34	7	34	33	34	32	3	30	35	26	30	7	22	27
FALSE	High	Master Protein	A0A088AQ38	Uncharacterized protein OS=Apis mellifera OX=7460 GN=LOC726158 PE=4 SV=1	PREDICTED: Apis mellifera glutathione hydrolase 1 proenzyme (LOC726158), transcript variant X1, mRNA	0	FALSE	48.472	21	12	26	12	650	76.2	8.97	3.4		7.02								14.69										3		7								10
FALSE	High	Master Protein	A0A088A763	Uncharacterized protein OS=Apis mellifera OX=7460 PE=4 SV=1	PREDICTED: Apis mellifera 39S ribosomal protein L42, mitochondrial (LOC102656685), transcript variant X1, mRNA	0	FALSE	82.972	67	14	124	14	252	28.1	8.37	25.9		36.09	26.59		12.93		4.09	26.25	17.53	38.53	0	8.25	4.72		13.82		7.02			8		9	9		7		1	11	7	9	1	4	4
FALSE	High	Master Protein	A0A088AQ52	Uncharacterized protein OS=Apis mellifera OX=7460 PE=4 SV=1		0	FALSE	6.161	2	2	4	2	859	96.6	9.31			3.78						0		1.78												2						1		1
FALSE	High	Master Protein	A0A088A7X2	Uncharacterized protein OS=Apis mellifera OX=7460 PE=4 SV=1	PREDICTED: Apis mellifera dynein heavy chain, cytoplasmic (LOC725068), transcript variant X1, mRNA	0	FALSE	14.384	31	6	15	6	249	24.5	9.26						1.7	0				1.63	0		3.41	3.85				0							4	1				1	1		2
FALSE	High	Master Protein	A0A088AQ74	Uncharacterized protein OS=Apis mellifera OX=7460 GN=726210 PE=4 SV=1		0.002	FALSE	2.788	12	1	1	1	109	12.9	9.79			0																				1
FALSE	High	Master Protein	A0A088AQ87	Uncharacterized protein OS=Apis mellifera OX=7460 GN=409768 PE=4 SV=1		0	FALSE	13.196	13	4	4	4	317	37.4	8.12											3.95																				4
FALSE	High	Master Protein	A0A088A9C6	Uncharacterized protein OS=Apis mellifera OX=7460 PE=4 SV=1	PREDICTED: Apis mellifera titin (LOC551259), transcript variant X21, mRNA	0	FALSE	19.916	16	6	27	6	528	60.1	8.62		4.46	5.05	2.07	7.04			4.72	1.66	0			4.53				3.81	5.15				2	2	1	3			2	1	1			2
FALSE	High	Master Protein	A0A088AQB0	Uncharacterized protein OS=Apis mellifera OX=7460 GN=LOC724779 PE=4 SV=1		0	FALSE	12.522	4	4	6	4	1265	139.5	7.06			2.15			0			0		1.96												1			1			1		3
FALSE	High	Master Protein	A0A088AQD9	Uncharacterized protein OS=Apis mellifera OX=7460 GN=LOC551812 PE=3 SV=1		0	FALSE	9.031	21	3	6	3	179	19.8	6.54	0		2.25								6.63										1		1								3
FALSE	High	Master Protein	A0A088A9Y9	Uncharacterized protein OS=Apis mellifera OX=7460 PE=4 SV=1	PREDICTED: Apis mellifera laminin subunit beta-1 (LOC726736), transcript variant X1, mRNA	0.004	FALSE	2.493	4	1	12	1	185	20.7	4.83		1.66	0	0	0	0		1.7		1.76	0		1.87		0							1	1	1	1	1		1		1	1		1
FALSE	High	Master Protein	A0A088AQG5	Uncharacterized protein OS=Apis mellifera OX=7460 PE=4 SV=1		0	FALSE	13.008	8	3	4	2	445	50.8	5.11	1.66										7.41										1										3
FALSE	High	Master Protein	A0A088AQG6	Uncharacterized protein OS=Apis mellifera OX=7460 PE=4 SV=1		0	FALSE	7.016	10	2	4	2	204	22.1	5.63																		8.14
FALSE	High	Master Protein	A0A088AQM9	Uncharacterized protein OS=Apis mellifera OX=7460 GN=LOC413551 PE=3 SV=1	PREDICTED: Apis mellifera mitochondrial coenzyme A transporter SLC25A42 (LOC413551), transcript variant X1, mRNA	0	FALSE	72.241	36	9	70	9	389	43.9	6.98		0	42.06	9.01	18.52		0	17.38	8.73	6.21	6.49		19.62		2.98		0	0		3.12		2	6	4	6		1	6	6	3	3		5
FALSE	High	Master Protein	A0A088ARA8	Uncharacterized protein OS=Apis mellifera OX=7460 GN=LOC725055 PE=4 SV=1	PREDICTED: Apis mellifera gamma-glutamylcyclotransferase (LOC725055), mRNA	0	FALSE	13.31	26	2	7	2	105	11.7	10.07	5.5		3.49						4.61		2.65										1		1						1		1
FALSE	High	Master Protein	A0A088ARF0	Uncharacterized protein OS=Apis mellifera OX=7460 PE=4 SV=1		0.001	FALSE	3.51	7	1	2	1	172	18.4	7.78	0										2.01										1										1
FALSE	High	Master Protein	A0A088ARH7	Uncharacterized protein OS=Apis mellifera OX=7460 PE=3 SV=1	PREDICTED: Apis mellifera pseudouridine-metabolizing bifunctional protein C1861.05 (LOC412233), mRNA	0	FALSE	5.914	5	1	16	1	227	26	6.65	4.31		3.24	0		0		4.64	1.63	2.15	5.39		2.95					5.09			1		1	1		1		1	1	1	1		1
FALSE	High	Master Protein	A0A088ARM3	Uncharacterized protein OS=Apis mellifera OX=7460 PE=4 SV=1		0	FALSE	5.247	22	1	2	1	96	11.6	9.07			7.28																				1
FALSE	High	Master Protein	A0A088ACB8	Uncharacterized protein OS=Apis mellifera OX=7460 PE=4 SV=1	PREDICTED: Apis mellifera estradiol 17-beta-dehydrogenase 8 (LOC552493), mRNA	0	FALSE	11.233	18	3	9	3	180	21.3	9.82	2.14		5.76			0					6.77		1.87								2		2			1					2		1
FALSE	High	Master Protein	A0A088ARM7	Uncharacterized protein OS=Apis mellifera OX=7460 GN=LOC724126 PE=4 SV=1		0	FALSE	15.056	6	4	21	4	781	85.6	6.57	0		11.34	1.79	2.14	2.67		2.29	0	2.34	2.58		0								1		3	2	1	1		1	1	2	2		1
FALSE	High	Master Protein	A0A088ARP9	Uncharacterized protein OS=Apis mellifera OX=7460 GN=LOC552637 PE=3 SV=1		0	FALSE	13.026	7	4	11	4	631	75.4	8.97			5.98		1.61				0		3.82				1.7			0					3		1				2		2
FALSE	High	Master Protein	A0A088AD15	Uncharacterized protein OS=Apis mellifera OX=7460 PE=4 SV=1	PREDICTED: Apis mellifera acetyl-CoA carboxylase (LOC552286), transcript variant X5, mRNA	0.002	FALSE	2.921	6	1	2	1	138	16	9.85			4.37																				1
FALSE	High	Master Protein	A0A088ARQ3	Uncharacterized protein OS=Apis mellifera OX=7460 GN=LOC552531 PE=3 SV=1		0.001	FALSE	3.136	0	1	2	1	2420	253	6.6										2.37						2.02														1
FALSE	High	Master Protein	A0A088ARQ4	Uncharacterized protein OS=Apis mellifera OX=7460 GN=mRpL20 PE=3 SV=1		0	FALSE	42.186	13	11	26	11	1141	129.8	9.01	0		46.62			0					1.95			1.62	2.62						1		11			1					1			1
FALSE	High	Master Protein	A0A088ARU2	Uncharacterized protein OS=Apis mellifera OX=7460 GN=LOC725315 PE=4 SV=1		0	FALSE	26.969	14	7	24	7	607	71.1	9.35	3.49		14.53			0					15.75		0								3		4			1					4		1
FALSE	High	Master Protein	A0A088AS35	Uncharacterized protein OS=Apis mellifera OX=7460 GN=LOC413043 PE=4 SV=1	PREDICTED: Apis mellifera UDP-glucuronosyltransferase 1-3 (LOC413043), mRNA	0	FALSE	144.068	29	31	167	30	1381	157.1	8.57	27.09		71.14	18.99	12.12	20.67	1.62	21.99	3.96	35.29	55.86	2.04	14.85	4.61	35.35	6.08	4.93	13.59	0	0	11		15	8	4	10	1	9	3	11	14	1	7	4
FALSE	High	Master Protein	A0A088ADZ2	Uncharacterized protein OS=Apis mellifera OX=7460 PE=4 SV=1	PREDICTED: Apis mellifera trichohyalin (LOC102654166), transcript variant X1, mRNA	0	FALSE	22.838	20	4	21	4	283	33	9.47	2		4.66	1.84		4.74		2.31	0		3.22			0		0			1.95		2		2	3		4		1	1		2			2
FALSE	High	Master Protein	A0A088AS36	Uncharacterized protein OS=Apis mellifera OX=7460 PE=3 SV=1		0	FALSE	13.378	10	3	6	3	417	47.5	8.9				0					10.54	1.97														1					2	1
FALSE	High	Master Protein	A0A088AEN1	Uncharacterized protein OS=Apis mellifera OX=7460 PE=4 SV=1	PREDICTED: Apis mellifera integrin alpha-PS2 (LOC724548), transcript variant X1, mRNA	0	FALSE	14.3	21	3	6	3	184	20.9	6.71			5.03	1.94	1.87								2.4				2.78						1	1	1								1
FALSE	High	Master Protein	A0A088AEP0	Uncharacterized protein OS=Apis mellifera OX=7460 PE=4 SV=1	PREDICTED: Apis mellifera laminin subunit alpha (LOC412663), mRNA	0	FALSE	14.433	22	4	13	4	215	24.4	6.01			5.05	3.6		0			2.33		5.23							2.58					2	2		1			2		2
FALSE	High	Master Protein	A0A088AS59	Uncharacterized protein OS=Apis mellifera OX=7460 GN=LOC411250 PE=3 SV=1	PREDICTED: Apis mellifera ATP-dependent RNA helicase p62-like (LOC102655407), transcript variant X2, mRNA	0	FALSE	6.928	31	2	6	2	72	8.2	9.77			2.37	0					2.05		2.38												1	1					2		1
FALSE	High	Master Protein	A0A088ASD3	Uncharacterized protein OS=Apis mellifera OX=7460 PE=4 SV=1		0	FALSE	43.651	37	12	32	12	431	49.1	7.55			38.18			0		0		3.73					1.64								12			2		2		2
FALSE	High	Master Protein	A0A088AEY8	Uncharacterized protein OS=Apis mellifera OX=7460 PE=4 SV=1	PREDICTED: Apis mellifera metal transporter CNNM4 (LOC552800), transcript variant X2, mRNA	0	FALSE	5.713	9	1	1	1	139	16.2	9.5											2.54																				1
FALSE	High	Master Protein	A0A088AFG1	Uncharacterized protein OS=Apis mellifera OX=7460 PE=4 SV=1	PREDICTED: Apis mellifera mitochondrial import inner membrane translocase subunit Tim16 (LOC102655673), mRNA	0	FALSE	49.259	16	13	107	13	887	100	5.5	17.89	14.55	7.39	7.26	7.23	12.43	4.77	8.84	5.25	8.07	14.25	4.78	9.6	5.05	9.32		5.51	18.24	0	1.74	5	4	3	3	2	3	2	5	4	3	4	3	6	3
FALSE	High	Master Protein	A0A088AFG4	Uncharacterized protein OS=Apis mellifera OX=7460 PE=4 SV=1	PREDICTED: Apis mellifera protein PTCD3 homolog, mitochondrial-like (LOC113218580), transcript variant X2, mRNA	0	FALSE	35.502	24	11	16	11	572	65.6	6.61	3.84		20.27		5.49				0	3.42											1		7		2				1	2
FALSE	High	Master Protein	A0A088ASH3	Uncharacterized protein OS=Apis mellifera OX=7460 GN=LOC725260 PE=4 SV=1		0	FALSE	6.985	1	1	5	1	957	105.1	7.12			5.38	0		0					2.54												1	1		1					1
FALSE	High	Master Protein	A0A088ASL0	Uncharacterized protein OS=Apis mellifera OX=7460 GN=LOC725201 PE=3 SV=1		0	FALSE	3.761	4	1	1	1	255	30.3	6.55			2.53																				1
FALSE	High	Master Protein	A0A088AGA1	Uncharacterized protein OS=Apis mellifera OX=7460 PE=4 SV=1	PREDICTED: Apis mellifera fibrillin-2 (LOC724421), mRNA	0	FALSE	103.826	37	19	53	19	693	79.5	8.32	10.88		22.27			6.45			0		53.06			0		0					7		8			6			1		18			1
FALSE	High	Master Protein	A0A088ASM8	Uncharacterized protein OS=Apis mellifera OX=7460 GN=mRpL35 PE=4 SV=1		0.009	FALSE	2.303	2	1	3	1	379	41.9	6.38		0	0								0											1	1								1
FALSE	High	Master Protein	A0A088ASM9	Uncharacterized protein OS=Apis mellifera OX=7460 PE=4 SV=1		0	FALSE	96.262	10	25	66	25	3498	389.4	5.17	5		13.43	29.1		7.74		0	5.82	16.48				2.25	20.79	3.98					4		9	8		6		1	4	11				3
FALSE	High	Master Protein	A0A088ASQ4	Uncharacterized protein OS=Apis mellifera OX=7460 GN=LOC552016 PE=3 SV=1		0.002	FALSE	2.916	1	1	1	1	945	106.8	6.02			2.05																				1
FALSE	High	Master Protein	A0A088ASR7	Uncharacterized protein OS=Apis mellifera OX=7460 PE=4 SV=1		0	FALSE	19.579	9	4	16	4	705	81.3	8.28			18.94		1.66			2.07	0	0			1.61										4		1			2	2	1			3
FALSE	High	Master Protein	A0A088AST4	Uncharacterized protein OS=Apis mellifera OX=7460 PE=4 SV=1		0	FALSE	18.653	35	3	6	3	139	15.8	6.13			12.51					0		1.88													3					1		1
FALSE	High	Master Protein	A0A088ASV9	Uncharacterized protein OS=Apis mellifera OX=7460 GN=LOC551533 PE=4 SV=1	PREDICTED: Apis mellifera pyridoxine/pyridoxamine 5'-phosphate oxidase (LOC551533), mRNA	0	FALSE	21.898	23	6	17	6	295	33.2	9.29	0		9.31	1.77	10.37	0				1.84					8.12						1		2	2	3	1				2
FALSE	High	Master Protein	A0A088AHE9	Uncharacterized protein OS=Apis mellifera OX=7460 PE=4 SV=1	PREDICTED: Apis mellifera prostaglandin E synthase 2 (LOC726977), transcript variant X1, mRNA	0	FALSE	10.746	18	3	6	3	350	38.7	6.93	0							2.45			1.88		2.29		1.72				0		1							1			1		1
FALSE	High	Master Protein	A0A088AHS6	Uncharacterized protein OS=Apis mellifera OX=7460 PE=4 SV=1	PREDICTED: Apis mellifera four and a half LIM domains protein 2 (LOC410211), transcript variant X1, mRNA	0	FALSE	4.144	10	2	2	2	177	20.1	9.19			4.38																				2
FALSE	High	Master Protein	A0A088ASW1	Uncharacterized protein OS=Apis mellifera OX=7460 PE=3 SV=1		0	FALSE	14.054	0	6	9	6	18830	2009.5	5.19		4.58	0				0															6	1				1
FALSE	High	Master Protein	A0A088ASW6	Uncharacterized protein OS=Apis mellifera OX=7460 GN=LOC408402 PE=4 SV=1	PREDICTED: Apis mellifera acetyl-coenzyme A transporter 1 (LOC408402), transcript variant X2, mRNA	0	FALSE	7.976	9	2	4	2	249	29.6	9.39			3.72								3.21												1								2
FALSE	High	Master Protein	A0A088AT27	Uncharacterized protein OS=Apis mellifera OX=7460 PE=4 SV=1	PREDICTED: Apis mellifera tumor suppressor candidate 3 (LOC412141), mRNA	0	FALSE	4.028	5	1	3	1	273	29.8	6.8									0																				1
FALSE	High	Master Protein	A0A088AIP6	Uncharacterized protein OS=Apis mellifera OX=7460 PE=4 SV=1	PREDICTED: Apis mellifera poly(ADP-ribose) glycohydrolase ARH3 (LOC411423), transcript variant X1, mRNA	0	FALSE	76.171	24	10	168	10	764	85.4	5.39	21.39	10.08	51.05	8.12	57.69	5.32	4.54	41.86	3.66	13.57	44.09	1.84	43.88		6.09	0	6.22	46.73		2.04	7	3	8	6	7	4	1	9	5	7	9	2	6
FALSE	High	Master Protein	A0A088ATB5	Uncharacterized protein OS=Apis mellifera OX=7460 GN=LOC409189 PE=3 SV=1		0	FALSE	4.37	19	1	6	1	47	5.6	8.44	0		1.64								2.05		1.73								1		1								1		1
FALSE	High	Master Protein	A0A088ATD6	Uncharacterized protein OS=Apis mellifera OX=7460 GN=Ndufb6 PE=4 SV=1		0	FALSE	40.709	49	8	47	8	216	22.9	9.61	28.25		10.53	1.62		11.06			11.98		29.88		1.65	3.56							6		3	2		5			4		6		2	2
FALSE	High	Master Protein	A0A088AIV3	Uncharacterized protein OS=Apis mellifera OX=7460 PE=4 SV=1	PREDICTED: Apis mellifera guanine nucleotide-binding protein G(o) subunit alpha (LOC102656465), transcript variant X2, mRNA	0	FALSE	7.106	2	1	6	1	970	108.9	9.22	2.06					2.99					3.1		2.81	4.64							1					1					1		1	1
FALSE	High	Master Protein	A0A088ATD9	Uncharacterized protein OS=Apis mellifera OX=7460 PE=4 SV=1		0	FALSE	6.277	10	1	4	1	130	14.9	5.91				2.76					1.96	2.16				0										1					1	1				1
FALSE	High	Master Protein	A0A088AJH7	Uncharacterized protein OS=Apis mellifera OX=7460 PE=4 SV=1	PREDICTED: Apis mellifera NADH dehydrogenase (ubiquinone) complex I, assembly factor 6 (LOC726383), mRNA	0	FALSE	52.382	47	8	33	8	262	28.7	7.49	0		32.27	0		0			0	4.92	6.86			2.62							2		7	2		1			2	4	3			2
FALSE	High	Master Protein	A0A088AJH8	Uncharacterized protein OS=Apis mellifera OX=7460 PE=4 SV=1	PREDICTED: Apis mellifera ubiquinol-cytochrome-c reductase complex assembly factor 1 (LOC726341), mRNA	0	FALSE	5.587	4	2	2	2	616	70.2	7.5			4.48																				2
FALSE	High	Master Protein	A0A088ATH2	Uncharacterized protein OS=Apis mellifera OX=7460 GN=LOC408642 PE=4 SV=1		0	FALSE	18.905	5	4	33	4	1057	118.9	6.28	4.1	5.67	6.07			8.76		3.92			4.27	0		6.3	8.98						3	3	1			3		2			2	2		2
FALSE	High	Master Protein	A0A088AJS0	Uncharacterized protein OS=Apis mellifera OX=7460 PE=4 SV=1	PREDICTED: Apis mellifera myosin light chain alkali (LOC410058), transcript variant X1, mRNA	0	FALSE	4.678	3	2	3	2	918	107	8.81			2																				2
FALSE	High	Master Protein	A0A088ATI7	Uncharacterized protein OS=Apis mellifera OX=7460 GN=LOC409126 PE=4 SV=1		0	FALSE	11.977	39	3	7	3	80	9.2	5.27			14.07	4.56				0															3	2				1
FALSE	High	Master Protein	A0A088ATK2	Uncharacterized protein OS=Apis mellifera OX=7460 PE=4 SV=1		0	FALSE	12.794	3	4	9	4	1208	136.8	4.93			0	0	2.14			0		2.38													1	1	2			1		3
FALSE	High	Master Protein	A0A088AKK2	Uncharacterized protein OS=Apis mellifera OX=7460 PE=4 SV=1	PREDICTED: Apis mellifera fasciclin-3 (LOC724243), transcript variant X4, mRNA	0	FALSE	7.869	13	2	5	2	170	19.9	10.56			2.68						0		4.27					0							1						1		2
FALSE	High	Master Protein	A0A088AKR9	Uncharacterized protein OS=Apis mellifera OX=7460 PE=4 SV=1	Apis mellifera cuticular protein 28 (CPR28), mRNA	0	FALSE	178.527	17	35	137	35	2885	316.3	4.72	2.07	5.86	87.04	20.66	73.75	0	3.36	10.98	20.79	52.26		8.94	0				3.92				1	1	25	5	21	1	1	5	10	20		5	1
FALSE	High	Master Protein	A0A088ATW6	Uncharacterized protein OS=Apis mellifera OX=7460 PE=3 SV=1	PREDICTED: Apis mellifera valine--tRNA ligase, mitochondrial (LOC727495), transcript variant X1, mRNA	0	FALSE	19.106	27	5	31	5	305	33.4	5.78	1.64	8.96			9.49		5.12	5.47			8.19		9.27		2.03			10.12		0	2	2			2		2	2			3		2
FALSE	High	Master Protein	A0A088AU27	Uncharacterized protein OS=Apis mellifera OX=7460 PE=4 SV=1		0	FALSE	12.748	19	1	7	1	75	8	7.56									5.43			8.94		3.7						0									1			1		1
FALSE	High	Master Protein	A0A088AUD4	Uncharacterized protein OS=Apis mellifera OX=7460 PE=3 SV=1		0	FALSE	5.61	1	1	1	1	2083	226.6	5.8																		3.37
FALSE	High	Master Protein	A0A088AUK1	Uncharacterized protein OS=Apis mellifera OX=7460 PE=4 SV=1		0	FALSE	11.1	1	3	5	3	5378	623.1	5.92				0					0															2					3
FALSE	High	Master Protein	A0A088AUM2	Uncharacterized protein OS=Apis mellifera OX=7460 GN=LOC408672 PE=4 SV=1		0	FALSE	30.601	7	8	20	8	1783	202.8	7.65			16.36					2.42		0	2.1		2.14			0	1.74	5.09					5					3		1	2		1
FALSE	High	Master Protein	A0A088AUM9	Uncharacterized protein OS=Apis mellifera OX=7460 GN=100577661 PE=4 SV=1		0	FALSE	3.661	1	1	1	1	1374	150	6.47			2.19																				1
FALSE	High	Master Protein	A0A088AUN7	Uncharacterized protein OS=Apis mellifera OX=7460 PE=4 SV=1		0.001	FALSE	3.042	3	2	2	2	640	75.3	7.25			1.81																				2
FALSE	High	Master Protein	A0A088AUP4	Uncharacterized protein OS=Apis mellifera OX=7460 GN=LOC724341 PE=4 SV=1		0	FALSE	32.433	18	4	77	4	392	40.5	4.75	17.8	8.5	13.41	4.72	5.37	17.76	2.74	11.17		11.64	10.67	12.78	7.49	16.69	20.74	0			6.46	0	3	1	3	2	1	4	1	3		4	4	3	2	4
FALSE	High	Master Protein	A0A088AUQ2	Uncharacterized protein OS=Apis mellifera OX=7460 PE=4 SV=1		0	FALSE	4.539	4	2	3	2	451	51.2	8.02			2.18								1.67												1								2
FALSE	High	Master Protein	A0A088AUT9	Uncharacterized protein OS=Apis mellifera OX=7460 GN=LOC410793 PE=4 SV=1		0	FALSE	7.138	23	2	37	2	86	9.7	5.21	5.81	1.7		4.07	1.74	5.78		1.85	1.65	3.62	4.19	3.85		1.92	6.69	0	0	2.14	0		2	1		2	2	2		2	2	2	2	2		2
FALSE	High	Master Protein	A0A088AUZ0	Uncharacterized protein OS=Apis mellifera OX=7460 GN=Ero1L PE=4 SV=1		0	FALSE	4.012	2	2	2	2	1362	152.3	5.27				0	0																			1	1
FALSE	High	Master Protein	A0A088AV14	Uncharacterized protein OS=Apis mellifera OX=7460 GN=Arc42 PE=3 SV=1		0.001	FALSE	3.028	0	1	2	1	2563	280.1	5.12	0			2.07																	1			1
FALSE	High	Master Protein	A0A088AV17	Uncharacterized protein OS=Apis mellifera OX=7460 PE=3 SV=1		0	FALSE	6.687	4	1	2	1	285	33.4	9.5			2.65																				1
FALSE	High	Master Protein	A0A088ANA5	Uncharacterized protein OS=Apis mellifera OX=7460 PE=4 SV=1	PREDICTED: Apis mellifera cleft lip and palate transmembrane protein 1 homolog (LOC727027), mRNA	0	FALSE	12.931	10	5	7	5	554	64.8	8.97	0		0								4.57										1		2								3
FALSE	High	Master Protein	A0A088AV36	Uncharacterized protein OS=Apis mellifera OX=7460 GN=GST-mic1 PE=4 SV=1		0	FALSE	7.253	2	2	24	2	904	91.4	4.92	0	7.75			0		9.2	4.18				4.2		0	7.45		7.22				2	2			1		2	2				1		1
FALSE	High	Master Protein	A0A088AV48	Uncharacterized protein OS=Apis mellifera OX=7460 PE=3 SV=1		0	FALSE	52.356	31	10	24	10	432	50.6	5.08			42.01	0	0			0	0				1.76					2.56					9	2	2			1	1				1
FALSE	High	Master Protein	A0A088ANE7	Uncharacterized protein OS=Apis mellifera OX=7460 PE=4 SV=1	PREDICTED: Apis mellifera multidrug resistance-associated protein 1 (LOC412217), transcript variant X1, mRNA	0.002	FALSE	2.98	7	1	1	1	200	22.5	9.91										2.14																				1
FALSE	High	Master Protein	A0A088ANE8	Uncharacterized protein OS=Apis mellifera OX=7460 PE=4 SV=1	PREDICTED: Apis mellifera multidrug resistance-associated protein 1 (LOC412217), transcript variant X1, mRNA	0	FALSE	21.173	13	6	12	6	642	74.3	7.78	2.03		2.05						0		9.94										2		3						1		5
FALSE	High	Master Protein	A0A088ANG3	Uncharacterized protein OS=Apis mellifera OX=7460 PE=4 SV=1	PREDICTED: Apis mellifera protein lap4 (LOC413669), transcript variant X8, mRNA	0	FALSE	23.324	5	4	6	4	1280	142.4	6.96			18.16																				4
FALSE	High	Master Protein	A0A088AV58	Uncharacterized protein OS=Apis mellifera OX=7460 GN=LOC552320 PE=4 SV=1		0	FALSE	18.017	14	4	8	4	327	36.1	6.54			13.53						4.36		1.9												4						2		1
FALSE	High	Master Protein	A0A088AV63	Uncharacterized protein OS=Apis mellifera OX=7460 GN=100576254 PE=4 SV=1		0	FALSE	7.848	22	2	14	2	83	8.7	6.52	4.33		4.48						2.05		6.31										2		2						2		2
FALSE	High	Master Protein	A0A088AV89	Uncharacterized protein OS=Apis mellifera OX=7460 GN=Oscp PE=3 SV=1		0	FALSE	6.334	3	2	3	1	735	83.6	8.82			2.46																				2
FALSE	High	Master Protein	A0A088AVA6	Uncharacterized protein OS=Apis mellifera OX=7460 GN=LOC410844 PE=4 SV=1	PREDICTED: Apis mellifera neuronal membrane glycoprotein M6-a (LOC410844), transcript variant X1, mRNA	0	FALSE	5.928	0	1	9	1	1899	210.9	5.44	0					1.79								4.15	0						1					1								1
FALSE	High	Master Protein	A0A088AVC8	Uncharacterized protein OS=Apis mellifera OX=7460 GN=LOC551742 PE=4 SV=1	PREDICTED: Apis mellifera MICOS complex subunit MIC25 (LOC551742), transcript variant X2, mRNA	0	FALSE	17.904	8	6	11	6	993	114.1	8.48	0		9.49								7.18										1		3								6
FALSE	High	Master Protein	A0A088AVD8	Uncharacterized protein OS=Apis mellifera OX=7460 GN=LOC409986 PE=4 SV=1		0	FALSE	30.182	42	2	87	2	108	10.6	9.16	26.78		36.44	30.53	16.38	30.87		22.34		16.48	25.69	4.67	4.68	25.07	28.81				0	6.93	2		2	2	2	2		2		2	2	1	2	2
FALSE	High	Master Protein	A0A088ARD8	Uncharacterized protein OS=Apis mellifera OX=7460 PE=4 SV=1	PREDICTED: Apis mellifera hypoxia up-regulated protein 1 (LOC551763), transcript variant X1, mRNA	0	FALSE	12.671	14	3	5	3	309	36.1	9.26			11.66								0												3								1
FALSE	High	Master Protein	A0A088AVG8	Uncharacterized protein OS=Apis mellifera OX=7460 GN=Y-x2 PE=4 SV=1	PREDICTED: Apis mellifera yellow-x2 (LOC727110), mRNA	0	FALSE	20.28	12	7	17	7	639	74	8.13	2.12		2.67	2.35		0			1.75		4.49		0			0		0			1		1	1		1			2		5		1
FALSE	High	Master Protein	A0A088ARI4	Uncharacterized protein OS=Apis mellifera OX=7460 PE=4 SV=1	PREDICTED: Apis mellifera exostosin-3 (LOC412055), transcript variant X3, mRNA	0	FALSE	17.709	16	4	8	4	418	47.8	7.43			8.75					5.61															4					1
FALSE	High	Master Protein	A0A088AVH5	Uncharacterized protein OS=Apis mellifera OX=7460 PE=4 SV=1		0	FALSE	8.754	6	2	6	2	438	50.7	7.75			8.49			1.82			4.41														2			1			1
FALSE	High	Master Protein	A0A088AS56	Uncharacterized protein OS=Apis mellifera OX=7460 PE=4 SV=1	PREDICTED: Apis mellifera apolipophorins (LOC408961), mRNA	0	FALSE	10.85	12	1	17	1	119	13.4	7.37	4.07	2.35	4.46		2.23	0		2.18					7.69		2.42			7.83			1	1	1		1	1		1					1
FALSE	High	Master Protein	A0A088AVI4	Uncharacterized protein OS=Apis mellifera OX=7460 GN=Myo1B PE=3 SV=1	PREDICTED: Apis mellifera myosin-IB (LOC410960), transcript variant X3, mRNA	0	FALSE	9.352	28	3	3	3	155	17.4	9.63			5.46												2.1								2
FALSE	High	Master Protein	A0A088ASL8	Uncharacterized protein OS=Apis mellifera OX=7460 PE=4 SV=1	PREDICTED: Apis mellifera vinculin (LOC552082), transcript variant X1, mRNA	0	FALSE	120.977	20	29	74	29	1840	205.5	5.35			59.9	10.34	9.25			3.14	3.75	37.54													19	8	6			2	7	17
FALSE	High	Master Protein	A0A088AVI5	Uncharacterized protein OS=Apis mellifera OX=7460 PE=3 SV=1		0.001	FALSE	3.201	4	1	1	1	456	51.8	5.01									2.24																				1
FALSE	High	Master Protein	A0A088AVK2	Uncharacterized protein OS=Apis mellifera OX=7460 PE=4 SV=1	PREDICTED: Apis mellifera cGMP-dependent protein kinase, isozyme 1 (LOC551714), mRNA	0	FALSE	98.303	36	22	87	22	850	98.1	5.74	7.03		13.66	46.78	0	9.31		0	18.54	10.49	5.21		4.78	3.49		15.64					3		4	18	1	3		1	12	5	1		1	3
FALSE	High	Master Protein	A0A088AVK6	Uncharacterized protein OS=Apis mellifera OX=7460 GN=RabGAP12 PE=4 SV=1		0	FALSE	23.827	32	3	9	3	122	13.7	9.91			13.75						3.31		1.86		4.34										3						1		1		1
FALSE	High	Master Protein	A0A088AVV0	Uncharacterized protein OS=Apis mellifera OX=7460 GN=LOC727651 PE=4 SV=1		0.002	FALSE	2.893	2	1	7	1	437	50.5	6.62			2.27		0			0		2.21					0			2.38		0			1		1			1		1
FALSE	High	Master Protein	A0A088AW19	Uncharacterized protein OS=Apis mellifera OX=7460 GN=LOC409833 PE=4 SV=1	PREDICTED: Apis mellifera hemK methyltransferase family member 1 (LOC409833), mRNA	0	FALSE	12.784	19	3	7	3	180	21.8	10.42			8.37	6.36																			2	3
FALSE	High	Master Protein	A0A088AW42	Uncharacterized protein OS=Apis mellifera OX=7460 PE=4 SV=1	PREDICTED: Apis mellifera dehydrogenase/reductase SDR family member 4 (LOC100577607), mRNA	0	FALSE	90.963	21	6	806	6	332	37.5	7.71	181.76	60.13	89.54	59.24	110.58	131.31	10.32	75.38	20.8	65.87	89	50.62	66.14	112.95	92.54	189.76	169.99	368.39	329.68	19.63	6	2	5	4	5	6	1	5	4	5	3	3	3	6
FALSE	High	Master Protein	A0A088AW43	Uncharacterized protein OS=Apis mellifera OX=7460 PE=4 SV=1		0	FALSE	6.85	41	2	15	2	64	7.6	4.61	4.57		9.01	1.71	1.71				1.73	1.9	1.81		1.64	0	0						2		2	1	1				2	1	1		1	1
FALSE	High	Master Protein	A0A088AUD1	Uncharacterized protein OS=Apis mellifera OX=7460 PE=4 SV=1	PREDICTED: Apis mellifera tropomyosin (LOC408583), transcript variant X5, mRNA	0	FALSE	4.472	10	2	3	2	210	25.4	8.78	0		1.72								0										1		1								1
FALSE	High	Master Protein	A0A088AW78	Uncharacterized protein OS=Apis mellifera OX=7460 PE=4 SV=1		0	FALSE	7.869	9	2	6	2	300	33	5.2		0	3.11	1.95		0					0		2.05									1	1	1		1					1		1
FALSE	High	Master Protein	A0A0B4J2M1	Uncharacterized protein OS=Apis mellifera OX=7460 GN=Rac PE=4 SV=1		0	FALSE	9.881	12	4	8	4	421	49.8	9.48	0		1.7								6.38										3		1								4
FALSE	High	Master Protein	A0A0B4J2M3	Uncharacterized protein OS=Apis mellifera OX=7460 GN=Cdc42 PE=4 SV=1		0.001	FALSE	3.072	3	1	3	1	513	57.9	7.84				0							0													1							1
FALSE	High	Master Protein	A0A088AUT2	Uncharacterized protein OS=Apis mellifera OX=7460 PE=4 SV=1	PREDICTED: Apis mellifera twitchin (LOC409821), transcript variant X34, mRNA	0	FALSE	5.34	1	1	1	1	2792	316.7	6.24									0																				1
FALSE	High	Master Protein	A0A0B4J2N2	Uncharacterized protein OS=Apis mellifera OX=7460 GN=Rho1 PE=4 SV=1		0	FALSE	6.935	5	1	5	1	361	35.2	5.16	0		2.99					2.62		2.03											1		1					1		1
FALSE	High	Master Protein	A0A0F9WNG7	Uncharacterized protein OS=Nosema ceranae OX=40302 GN=AAJ76_6000015274 PE=4 SV=1		0.001	FALSE	3.566	2	1	1	1	718	81.6	8.54			1.89																				1
FALSE	High	Master Protein	A0A088AVL7	Uncharacterized protein OS=Apis mellifera OX=7460 PE=4 SV=1	PREDICTED: Apis mellifera dumpy (LOC551170), transcript variant X1, mRNA	0	FALSE	8.002	27	2	4	2	75	8.5	10.35	2.06								0		5.29										1								1		2
FALSE	High	Master Protein	A0A0F9ZH36	Uncharacterized protein OS=Nosema ceranae OX=40302 GN=AAJ76_2000149161 PE=4 SV=1		0	FALSE	24.712	9	6	13	6	764	89.3	8			13.8		1.61			2.34	0	1.82													5		2			1	1	1
FALSE	High	Master Protein	A0A221DRY4	Uncharacterized protein OS=Serratia marcescens OX=615 GN=BVG97_12475 PE=4 SV=1		0	FALSE	4.296	5	1	1	1	164	19.2	9.83			2.13																				1
FALSE	High	Master Protein	C4V6M7	Uncharacterized protein OS=Nosema ceranae (strain BRL01) OX=578460 GN=NCER_100063 PE=4 SV=1		0	FALSE	7.363	2	2	12	2	982	111.4	5.6	0		2.87	4.62		2.13			0	2.11	5.51							2.03			1		1	1		1			1	1	1
FALSE	High	Master Protein	C4V6M8	Uncharacterized protein OS=Nosema ceranae (strain BRL01) OX=578460 GN=NCER_100064 PE=4 SV=1	Nosema ceranae isolate Thailand clone 9 hypothetical protein (NCER_100064) gene, partial cds	0	FALSE	248.155	25	69	271	69	3298	367.4	8.51	64.8		11.76	24.42		25.6		6.72	77.51	40.52	26.54	4.4	4.91	24.97	38.95	0	2.11	14.51	3.25		37		7	14		24		4	51	21	12	2	2	25
FALSE	High	Master Protein	C4V7X1	Uncharacterized protein OS=Nosema ceranae (strain BRL01) OX=578460 GN=NCER_100566 PE=4 SV=1	Nosema ceranae isolate Thailand clone 10 hypothetical protein (NCER_100566) gene, partial cds	0	FALSE	47.08	27	10	33	10	518	58.4	8.9	16.25		5.08	2.29		2.3			0		29.33										7		2	2		2			1		9
FALSE	High	Master Protein	C4V8J7	Uncharacterized protein OS=Nosema ceranae (strain BRL01) OX=578460 GN=NCER_100828 PE=4 SV=1		0	FALSE	21.837	28	6	14	6	254	30.3	8.38								7.5					13.86															4					5
FALSE	High	Master Protein	C4V9F5	Uncharacterized protein OS=Nosema ceranae (strain BRL01) OX=578460 GN=NCER_101194 PE=3 SV=1		0	FALSE	9.21	14	3	7	3	354	41.1	8.21								5.18					9.88					2.7										2					3
FALSE	High	Master Protein	H9JZY2	Uncharacterized protein OS=Apis mellifera OX=7460 GN=LOC725881 PE=4 SV=1		0.001	FALSE	3.812	6	1	1	1	292	34.1	5.24									0																				1
FALSE	High	Master Protein	H9KNB7	Uncharacterized protein OS=Apis mellifera OX=7460 GN=LOC551176 PE=3 SV=1		0	FALSE	15.296	17	5	7	5	341	41.2	8.43					0				0			1.92			2				0						1				2			1
FALSE	High	Master Protein	H9KQA6	Uncharacterized protein OS=Apis mellifera OX=7460 GN=LOC409613 PE=3 SV=1		0	FALSE	9.3	14	4	8	4	475	52.8	6.86					2.09				0			0													2				4			1
FALSE	High	Master Protein	L2GKX2	Uncharacterized protein OS=Vittaforma corneae (strain ATCC 50505) OX=993615 GN=VICG_01824 PE=3 SV=1		0.001	FALSE	3.594	2	1	1	1	679	77.8	5.14									1.84																				1
FALSE	High	Master Protein	L2GN42	Uncharacterized protein OS=Vittaforma corneae (strain ATCC 50505) OX=993615 GN=VICG_00645 PE=4 SV=1		0	FALSE	40.53	47	8	28	8	263	30	6.15					8.92				14.6			2.47			12.47										3				7			3
FALSE	High	Master Protein	T0LCY7	Uncharacterized protein OS=Nosema apis BRL 01 OX=1037528 GN=NAPIS_ORF00249 PE=4 SV=1		0.001	FALSE	3.444	5	1	1	1	236	26.4	9.55									2.02																				1
FALSE	High	Master Protein	T0LCZ1	Uncharacterized protein OS=Nosema apis BRL 01 OX=1037528 GN=NAPIS_ORF00254 PE=4 SV=1		0.009	FALSE	2.316	2	1	6	1	727	81.3	8.48			3.42	0		0					0			0									1	1		1					1			1
FALSE	High	Master Protein	T0MBQ4	Uncharacterized protein OS=Nosema apis BRL 01 OX=1037528 GN=NAPIS_ORF01820 PE=4 SV=1		0	FALSE	4.095	3	1	5	1	248	28.5	6.87			5.38	0					0														1	1					1
FALSE	High	Master Protein	U3KQX7	Uncharacterized protein OS=Apis mellifera OX=7460 PE=3 SV=1		0.001	FALSE	3.217	2	1	15	1	454	50.8	8.59		3.71	1.79		0		6.44	7.78				3.49					1.77					1	1		1		1	1				1
FALSE	High	Master Protein	A0A088ALS1	Uroporphyrinogen decarboxylase OS=Apis mellifera OX=7460 PE=3 SV=1		0.002	FALSE	2.693	2	1	2	1	346	39	8.91				0					0															1					1
FALSE	High	Master Protein	A0A087ZT35	UTP--glucose-1-phosphate uridylyltransferase OS=Apis mellifera OX=7460 GN=UGP PE=3 SV=1		0	FALSE	111.529	53	19	84	19	507	57.5	7.61	0		84.26	19.29	2	4.38		0	7.11	20.27			2.42	0	16.77			1.83			1		16	7	2	2		1	5	8			1	2
FALSE	High	Master Protein	A0A088ADH1	Vacuolar proton pump subunit B OS=Apis mellifera OX=7460 GN=LOC551721 PE=3 SV=1		0	FALSE	173.481	53	19	208	19	495	55.1	5.58	0		202.28	56.77		13.34		6.3	6.33	73.25	8.74			28.01	19.81	9.6			0		1		17	14		10		4	5	17	2			9
FALSE	High	Master Protein	A0A088A2E2	V-ATPase_H_C domain-containing protein OS=Apis mellifera OX=7460 GN=VhaSFD PE=4 SV=1		0	FALSE	93.978	42	18	67	18	516	59.7	6.21			71.29	3.88		0		0	1.6	2.21	2.03		2.19	2.08			4.72	0	0				15	7		2		2	3	6	3		1	2
FALSE	High	Master Protein	Q5BLY5	Venom acid phosphatase Acph-1 OS=Apis mellifera OX=7460 PE=1 SV=1		0	FALSE	24.829	20	5	8	5	388	45.4	5.9			14.34																				5
FALSE	High	Master Protein	B2D0J4	Venom dipeptidyl peptidase 4 OS=Apis mellifera OX=7460 PE=1 SV=1		0	FALSE	8.032	5	3	3	3	775	87.9	6.1																		6.19
FALSE	High	Master Protein	A0A087ZYX8	Venom serine protease 34 OS=Apis mellifera OX=7460 GN=SP28 PE=2 SV=1		0	FALSE	5.975	7	2	2	2	405	44.6	6.29								2.06																				2
FALSE	High	Master Protein	A0A088AM83	V-SNARE coiled-coil homology domain-containing protein OS=Apis mellifera OX=7460 PE=4 SV=1		0	FALSE	8.779	12	1	9	1	139	15.4	9.45			2.97					2.7					2.59		1.78		2.05	8.45	0				1					1					1
FALSE	High	Master Protein	Q7YU97	V-type proton ATPase proteolipid subunit OS=Apis mellifera OX=7460 GN=vha16 PE=2 SV=1		0	FALSE	29.721	31	2	59	2	156	16	7.4	8.86		19.23	21.04		8.13			20.43	8.14	5.78			9.17			11.78	28.25	0		1		1	1		1			1	1	1			1
FALSE	High	Master Protein	A0A088A741	V-type proton ATPase subunit a OS=Apis mellifera OX=7460 PE=3 SV=1		0	FALSE	49.173	48	8	60	7	155	18.3	5.08	9.72		42.55	9.22		17.47			13.99	11.59	4.5		2.26			0					4		7	6		5			6	5	3		1
FALSE	High	Master Protein	A0A087ZRG7	V-type proton ATPase subunit a OS=Apis mellifera OX=7460 PE=3 SV=1		0	FALSE	28.986	44	5	30	5	125	14.2	7.85	8.96		24.13		2.49	4.62		4.58	6.55	2.43	3.14				0				2.34		2		4		1	3		1	4	1	2
FALSE	High	Master Protein	A0A087ZRG8	V-type proton ATPase subunit a OS=Apis mellifera OX=7460 PE=3 SV=1		0	FALSE	24.38	11	5	58	4	484	55.1	6.58	6.4		22.75	12.98	6.34	9.17		3.72	11.91	6.65	3.81	1.64	2.56	0	3.51						3		5	4	2	4		2	4	4	2	1	1	1
FALSE	High	Master Protein	A0A087ZUG7	V-type proton ATPase subunit a OS=Apis mellifera OX=7460 PE=3 SV=1		0	FALSE	190.968	34	24	165	22	841	96.4	6.37	3.78	1.9	227.52	29.46	5.86	14.16		3.96	3.44	32.04	12.7		2.35	4.58	14.25	0	1.95				2	1	23	11	3	9		4	3	11	8		1	6
FALSE	High	Master Protein	A0A088A5Z4	V-type proton ATPase subunit C OS=Apis mellifera OX=7460 PE=3 SV=1		0	FALSE	88.856	28	15	98	15	581	66	6.95	6.41	3.73	100.14	20.4	4.42	10.57		9.42	14.41	18.09	12.53		2.23	11.88	4.02	0	1.78	2.07	0		2	1	15	8	1	4		3	3	8	2		1	3
FALSE	High	Master Protein	A0A087ZV69	V-type proton ATPase subunit F OS=Apis mellifera OX=7460 GN=LOC552476 PE=3 SV=1		0	FALSE	15.394	34	3	5	3	123	13.7	6.27			12.09							5													2							2
FALSE	High	Master Protein	A0A087ZYW3	V-type proton ATPase subunit G OS=Apis mellifera OX=7460 GN=Vha13 PE=3 SV=1		0	FALSE	22.714	35	3	31	3	118	13.8	8.84	0	2.69	13.02	6.9	0	4.44		5.92	0	4.08	5.37			2.19	0						1	1	2	2	1	1		1	1	2	1			1
FALSE	High	Master Protein	A0A088AFI1	V-type proton ATPase subunit OS=Apis mellifera OX=7460 GN=LOC552410 PE=3 SV=1		0	FALSE	6.232	24	2	13	2	89	10.2	8.35			13.2	4.07		2.05		2.15		4.37													2	1		2		1		1
FALSE	High	Master Protein	A0A088A285	V-type proton ATPase subunit OS=Apis mellifera OX=7460 GN=VhaAC39 PE=3 SV=1		0	FALSE	136.946	46	13	199	13	348	39.5	5.05	20.16	2.08	170.06	39.4	17.88	32.46		32.04	20.22	49.28	37.1	2.06	22.14	13.14	7.16					0	5	1	12	7	3	10		6	7	8	6	2	5	7
FALSE	High	Master Protein	A0A088AFJ2	VWFA domain-containing protein OS=Apis mellifera OX=7460 GN=Pros54 PE=4 SV=1		0.001	FALSE	3.049	4	1	1	1	399	44	5.03			2.6																				1
FALSE	High	Master Protein	A0A088AKS6	VWFA domain-containing protein OS=Apis mellifera OX=7460 PE=4 SV=1		0	FALSE	23.76	6	6	12	6	1595	179.8	7.14	1.72		5.99								8.52										3		2								5
FALSE	High	Master Protein	A0A087ZND5	W2 domain-containing protein OS=Apis mellifera OX=7460 PE=4 SV=1		0	FALSE	16.434	5	7	19	7	1730	201.1	6.52	0	0	2.14	0		0			1.65		1.74		1.62				0	9.11			1	1	1	1		1			4		2		1
FALSE	High	Master Protein	A0A088A0M7	WD_REPEATS_REGION domain-containing protein OS=Apis mellifera OX=7460 GN=flr PE=4 SV=1		0	FALSE	5.607	3	1	1	1	602	66.9	6.8																		4.13
FALSE	High	Master Protein	A0A088ATY3	WD_REPEATS_REGION domain-containing protein OS=Apis mellifera OX=7460 GN=LOC409348 PE=4 SV=1		0	FALSE	78.432	22	19	74	19	1139	124.7	5.99	10.35		51.36	9.84		0			8.01	8.06	13.91			1.74		0	4.96	7.39			8		17	9		5			7	6	7			1
FALSE	High	Master Protein	A0A088AR98	WD_REPEATS_REGION domain-containing protein OS=Apis mellifera OX=7460 GN=LOC410497 PE=4 SV=1		0	FALSE	55	44	10	35	10	341	37.3	6.18			41.11	2.13	1.91				1.77	3.95			0										10	4	3				2	4			1
FALSE	High	Master Protein	A0A088A2A0	WD_REPEATS_REGION domain-containing protein OS=Apis mellifera OX=7460 GN=Rack1 PE=4 SV=1		0	FALSE	14.158	17	4	4	4	317	35.7	7.71				5.52							0													3							1
FALSE	High	Master Protein	A0A088APX8	WD_REPEATS_REGION domain-containing protein OS=Apis mellifera OX=7460 PE=4 SV=1		0	FALSE	5.538	2	2	5	2	1279	142.3	6.44	0					0			0	0											1					1			2	1
FALSE	High	Master Protein	A0A088AHE2	zf-CHCC domain-containing protein OS=Apis mellifera OX=7460 GN=Ndufs6 PE=4 SV=1		0	FALSE	9.478	24	2	4	2	124	14	9.17			5.63						2.27				0										1						1				1
FALSE	High	Master Protein	A0A087ZR94	zf-Tim10_DDP domain-containing protein OS=Apis mellifera OX=7460 GN=LOC725705 PE=3 SV=1		0.001	FALSE	3.51	26	2	3	2	90	10.4	8.16	0										0										1										1
FALSE	High	Master Protein	A0A088A2P2	zf-Tim10_DDP domain-containing protein OS=Apis mellifera OX=7460 GN=Tim10 PE=4 SV=1		0	FALSE	3.661	16	2	4	2	91	10.4	7.8	0								0	0	0										1								1	1	1
FALSE	High	Master Protein	A0A088AI79	zf-Tim10_DDP domain-containing protein OS=Apis mellifera OX=7460 GN=Tim8 PE=3 SV=1		0	FALSE	4.13	13	1	5	1	86	9.8	4.84	2.09								0		2.31							0			1								1		1
FALSE	High	Master Protein	A0A087ZQZ7	ZnF_CDGSH domain-containing protein OS=Apis mellifera OX=7460 GN=LOC410636 PE=4 SV=1		0	FALSE	91.127	91	9	193	9	131	14.6	8.35	13.64	10.43	45.43	0	15.05	11.98	4.67	34.6	17.73	7.34	41.92	8.16	48.47	7.51	2.69	2.17	11.35	26.54	8.54	5.2	3	4	6	1	6	7	2	7	7	5	8	2	6	6
FALSE	High	Master Protein	A0A088AVW9	ZnMc domain-containing protein OS=Apis mellifera OX=7460 GN=LOC409868 PE=3 SV=1		0	FALSE	57.638	27	12	86	12	575	64.6	6.62	7.85		20.51	12.05	21.19	3.88		18.64	7.81	12.26	2.76		5.21	0	2.71					0	6		6	6	7	3		6	9	8	2		3	1
FALSE	High	Master Protein	A0A088ABL4	ZP domain-containing protein OS=Apis mellifera OX=7460 GN=dyl PE=4 SV=1		0	FALSE	85.966	13	9	161	7	631	68.1	7.23	24.55	22.38	38.72	0	16.45	62.7		28.49		6.84	14.33	44.53	7.98	52.1	35.74	0	3	3.25		2.5	5	5	4	1	3	8		5		1	3	7	2	8
FALSE	High	Master Protein	A0A088A3L7	ZP domain-containing protein OS=Apis mellifera OX=7460 GN=LOC725683 PE=4 SV=1		0	FALSE	55.425	16	8	143	8	650	70.6	5.67		66.19	44.4			5.14	44.85	56.84		8.97		40.78			2.39	30.43	8.84		12.15			6	7			4	5	7		4		5
FALSE	High	Master Protein	A0A087ZSD8	ZP domain-containing protein OS=Apis mellifera OX=7460 GN=LOC727081 PE=4 SV=1		0	FALSE	4.616	4	1	1	1	412	46.1	6.77		3.37																				1
FALSE	High	Master Protein	A0A088AFK7	ZP domain-containing protein OS=Apis mellifera OX=7460 GN=m PE=4 SV=1		0	FALSE	49.513	15	5	45	5	601	66.2	6.34	12.56					33.44		0			5.72	16.77		34.61	7.83						2					4		1			1	3		5
FALSE	High	Master Protein	A0A088AES3	ZP domain-containing protein OS=Apis mellifera OX=7460 PE=4 SV=1		0	FALSE	50.063	26	9	98	7	467	51.2	8.1	2.01	7.53	11		4.68	20.86	8.78	7.98		2.54	16.88	32.26	8.24	26.02	24.69	2.05	5	8.55	5.57		2	2	3		2	8	1	5		1	4	6	2	9
[truncated: 37 more columns]
